# Supplementary material for: High throughput microRNAs sequencing profile of serum exosomes in women with and without polycystic ovarian syndrome
Source: PeerJ journal article supplement (doi:10.7717/peerj.10998), 2021-03-12

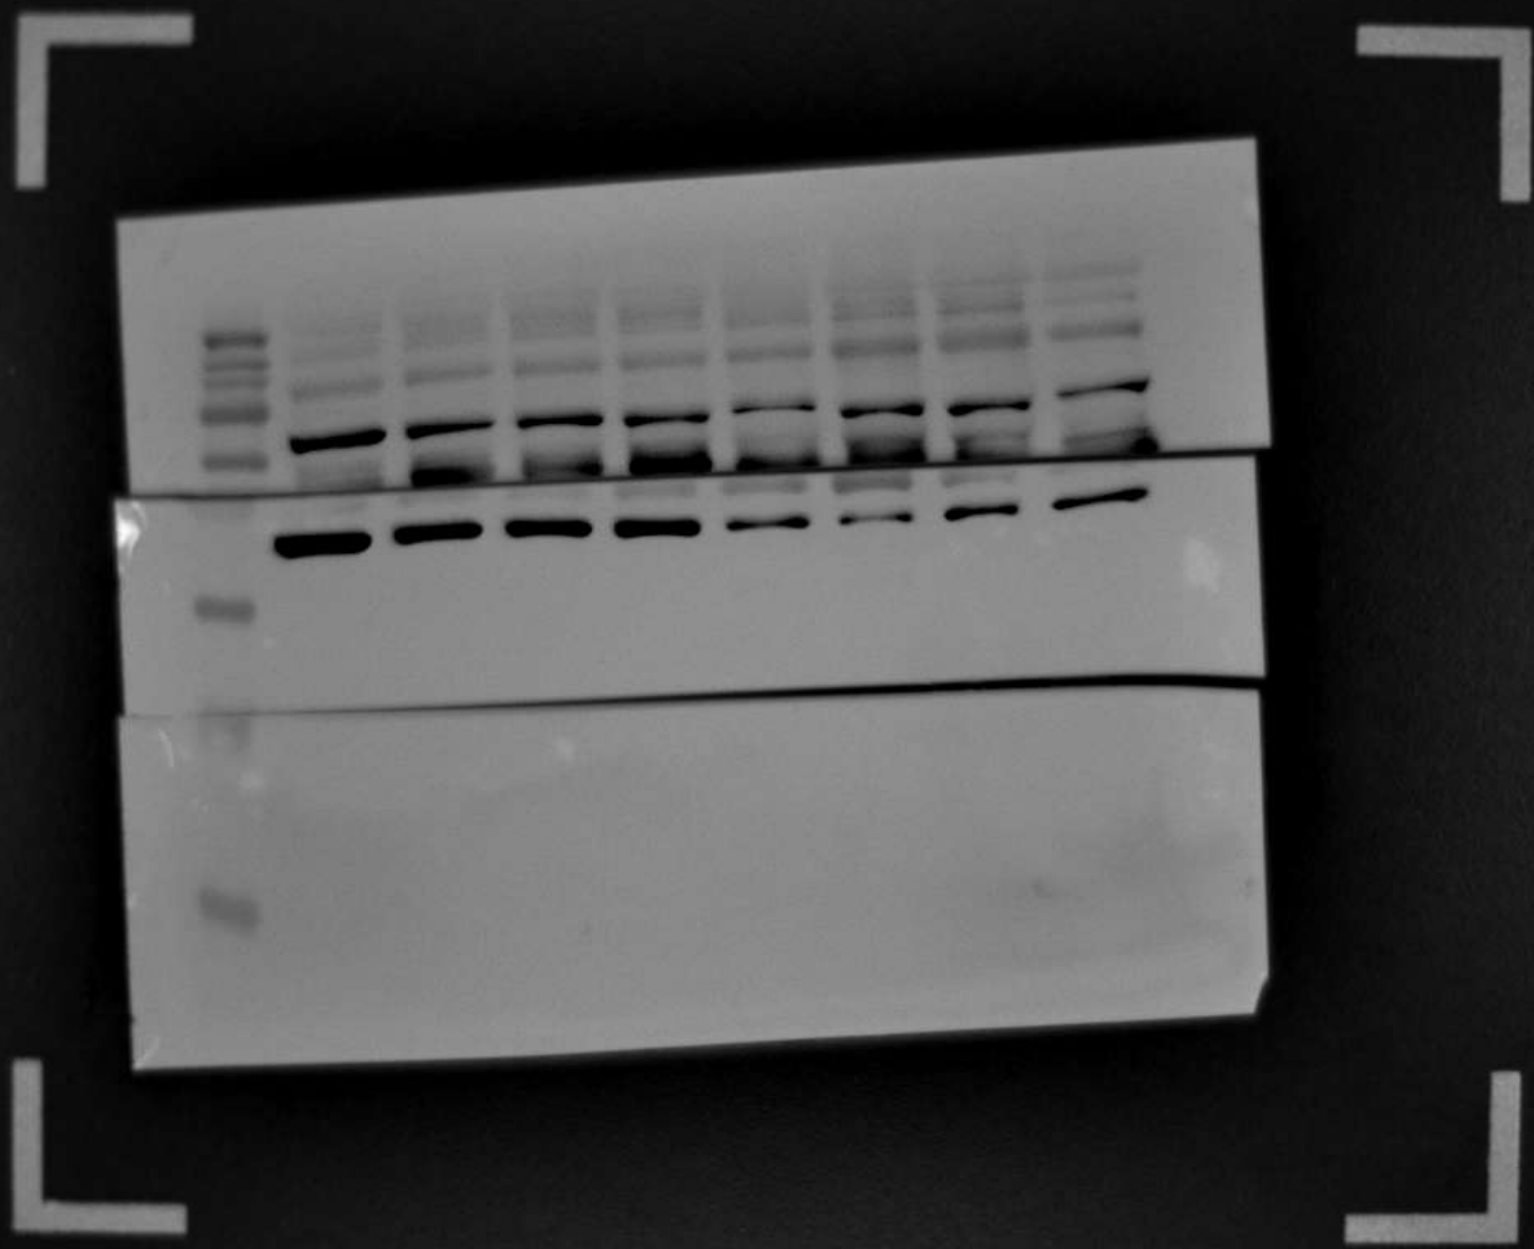

Supplement: Fig1_Raw_data.pdf [file Fig1_Raw_data.pdf]
