# Supplementary material for: High throughput microRNAs sequencing profile of serum exosomes in women with and without polycystic ovarian syndrome
Source: PeerJ. 2021 Mar 12;9:e10998. doi: 10.7717/peerj.10998 (PMC7958896; doi:10.7717/peerj.10998)
Supplement: Supplemental Information 2 [file peerj-09-10998-s002.xls]

## Sheet: U6
Block Type	384-Well Block
Chemistry	SYBR_GREEN
Experiment Name	2019-07-05 panhaitao
Experiment Run End Time	2019-07-06 02:11:50 AM CST
Experiment Type	Comparative Cт (ΔΔCт)
Instrument Type	QuantStudio(TM) 6 Flex System
Passive Reference	ROX
Quantification Cycle Method	Ct
Signal Smoothing On	true
Stage/ Cycle where Analysis is performed	Stage 2, Step 2
User Name
Well	Well Position	Sample Name	Target Name	Task	Reporter	Quencher	CT	Ct Mean	Ct SD	Tm1	Ct Threshold
1	A1	PCOS-T1	U6	UNKNOWN	SYBR	None	15.6412	15.7613	0.11073	76.8038	0.1
2	A2	PCOS-T1	U6	UNKNOWN	SYBR	None	15.8594	15.7613	0.11073	76.6718	0.1
3	A3	PCOS-T1	U6	UNKNOWN	SYBR	None	15.7832	15.7613	0.11073	76.8038	0.1
25	B1	PCOS-T2	U6	UNKNOWN	SYBR	None	14.6681	15.0161	0.411331	76.8038	0.1
26	B2	PCOS-T2	U6	UNKNOWN	SYBR	None	15.47	15.0161	0.411331	76.6718	0.1
27	B3	PCOS-T2	U6	UNKNOWN	SYBR	None	14.91	15.0161	0.411331	76.9357	0.1
49	C1	PCOS-T3	U6	UNKNOWN	SYBR	None	15.3036	15.3187	0.025424	76.8038	0.1
50	C2	PCOS-T3	U6	UNKNOWN	SYBR	None	15.3044	15.3187	0.025424	76.9357	0.1
51	C3	PCOS-T3	U6	UNKNOWN	SYBR	None	15.348	15.3187	0.025424	76.9357	0.1
73	D1	PCOS-T4	U6	UNKNOWN	SYBR	None	14.3718	14.5288	0.137543	76.6718	0.1
74	D2	PCOS-T4	U6	UNKNOWN	SYBR	None	14.628	14.5288	0.137543	76.8038	0.1
75	D3	PCOS-T4	U6	UNKNOWN	SYBR	None	14.5867	14.5288	0.137543	76.9357	0.1
97	E1	PCOS-T5	U6	UNKNOWN	SYBR	None	16.3499	16.3947	0.065318	76.8038	0.1
98	E2	PCOS-T5	U6	UNKNOWN	SYBR	None	16.4696	16.3947	0.065318	76.9357	0.1
99	E3	PCOS-T5	U6	UNKNOWN	SYBR	None	16.3645	16.3947	0.065318	76.9357	0.1
121	F1	PCOS-NC1	U6	UNKNOWN	SYBR	None	14.1474	14.5152	0.369206	76.9357	0.1
122	F2	PCOS-NC1	U6	UNKNOWN	SYBR	None	14.8858	14.5152	0.369206	76.9357	0.1
123	F3	PCOS-NC1	U6	UNKNOWN	SYBR	None	14.5124	14.5152	0.369206	76.9357	0.1
145	G1	PCOS-NC2	U6	UNKNOWN	SYBR	None	15.4254	15.4089	0.0531867	76.9357	0.1
146	G2	PCOS-NC2	U6	UNKNOWN	SYBR	None	15.4519	15.4089	0.0531867	77.0676	0.1
147	G3	PCOS-NC2	U6	UNKNOWN	SYBR	None	15.3495	15.4089	0.0531867	77.0676	0.1
169	H1	PCOS-NC3	U6	UNKNOWN	SYBR	None	14.8445	14.9349	0.216836	77.0676	0.1
170	H2	PCOS-NC3	U6	UNKNOWN	SYBR	None	14.7778	14.9349	0.216836	77.0676	0.1
171	H3	PCOS-NC3	U6	UNKNOWN	SYBR	None	15.1823	14.9349	0.216836	77.0676	0.1
193	I1	PCOS-NC4	U6	UNKNOWN	SYBR	None	15.7518	15.7423	0.139356	76.9357	0.1
194	I2	PCOS-NC4	U6	UNKNOWN	SYBR	None	15.5985	15.7423	0.139356	76.6718	0.1
195	I3	PCOS-NC4	U6	UNKNOWN	SYBR	None	15.8767	15.7423	0.139356	76.9357	0.1
217	J1	PCOS-NC5	U6	UNKNOWN	SYBR	None	15.7311	15.9812	0.256711	76.9357	0.1
218	J2	PCOS-NC5	U6	UNKNOWN	SYBR	None	15.9684	15.9812	0.256711	76.9357	0.1
219	J3	PCOS-NC5	U6	UNKNOWN	SYBR	None	16.2441	15.9812	0.256711	76.9357	0.1
361	P1		U6	NTC	SYBR	None	Undetermined			61.2761	0.1
Analysis Type	Singleplex
Endogenous Control
RQ Min/Max Confidence Level	95.0
Reference Sample
Sample Name	Target Name	Ct Mean
PCOS-T1	U6	15.7613
PCOS-T2	U6	15.0161
PCOS-T3	U6	15.3187
PCOS-T4	U6	14.5288
PCOS-T5	U6	16.3947
PCOS-NC1	U6	14.5152
PCOS-NC2	U6	15.4089
PCOS-NC3	U6	14.9349
PCOS-NC4	U6	15.7423
PCOS-NC5	U6	15.9812

## Sheet: miR-6818-5p 
Block Type	384-Well Block
Chemistry	SYBR_GREEN
Experiment Name	2019-07-05 panhaitao
Experiment Run End Time	2019-07-06 02:11:50 AM CST
Experiment Type	Comparative Cт (ΔΔCт)
Instrument Type	QuantStudio(TM) 6 Flex System
Passive Reference	ROX
Quantification Cycle Method	Ct
Signal Smoothing On	true
Stage/ Cycle where Analysis is performed	Stage 2, Step 2
User Name
Well	Well Position	Sample Name	Target Name	Task	Reporter	Quencher	CT	Ct Mean	Ct SD	Tm1	Ct Threshold
4	A4	PCOS-T1	miR-6818-5p	UNKNOWN	SYBR	None	22.4105	22.3623	0.102215	79.7059	0.1
5	A5	PCOS-T1	miR-6818-5p	UNKNOWN	SYBR	None	22.4315	22.3623	0.102215	79.7059	0.1
6	A6	PCOS-T1	miR-6818-5p	UNKNOWN	SYBR	None	22.2449	22.3623	0.102215	79.8379	0.1
28	B4	PCOS-T2	miR-6818-5p	UNKNOWN	SYBR	None	23.262	23.4107	0.230212	79.8379	0.1
29	B5	PCOS-T2	miR-6818-5p	UNKNOWN	SYBR	None	23.6758	23.4107	0.230212	79.8379	0.1
30	B6	PCOS-T2	miR-6818-5p	UNKNOWN	SYBR	None	23.2941	23.4107	0.230212	79.8379	0.1
52	C4	PCOS-T3	miR-6818-5p	UNKNOWN	SYBR	None	22.511	22.4989	0.0217746	79.8379	0.1
53	C5	PCOS-T3	miR-6818-5p	UNKNOWN	SYBR	None	22.4738	22.4989	0.0217746	79.8379	0.1
54	C6	PCOS-T3	miR-6818-5p	UNKNOWN	SYBR	None	22.512	22.4989	0.0217746	79.8379	0.1
76	D4	PCOS-T4	miR-6818-5p	UNKNOWN	SYBR	None	23.2944	23.2627	0.106446	79.8379	0.1
77	D5	PCOS-T4	miR-6818-5p	UNKNOWN	SYBR	None	23.3497	23.2627	0.106446	79.9698	0.1
78	D6	PCOS-T4	miR-6818-5p	UNKNOWN	SYBR	None	23.144	23.2627	0.106446	79.9698	0.1
100	E4	PCOS-T5	miR-6818-5p	UNKNOWN	SYBR	None	24.7475	24.9482	0.189501	79.8379	0.1
101	E5	PCOS-T5	miR-6818-5p	UNKNOWN	SYBR	None	25.124	24.9482	0.189501	79.7059	0.1
102	E6	PCOS-T5	miR-6818-5p	UNKNOWN	SYBR	None	24.973	24.9482	0.189501	79.8379	0.1
124	F4	PCOS-NC1	miR-6818-5p	UNKNOWN	SYBR	None	20.5386	20.5367	0.162977	79.8379	0.1
125	F5	PCOS-NC1	miR-6818-5p	UNKNOWN	SYBR	None	20.6988	20.5367	0.162977	79.8379	0.1
126	F6	PCOS-NC1	miR-6818-5p	UNKNOWN	SYBR	None	20.3728	20.5367	0.162977	79.9698	0.1
148	G4	PCOS-NC2	miR-6818-5p	UNKNOWN	SYBR	None	25.4722	25.6326	0.173244	79.8379	0.1
149	G5	PCOS-NC2	miR-6818-5p	UNKNOWN	SYBR	None	25.8163	25.6326	0.173244	79.8379	0.1
150	G6	PCOS-NC2	miR-6818-5p	UNKNOWN	SYBR	None	25.6093	25.6326	0.173244	79.9698	0.1
172	H4	PCOS-NC3	miR-6818-5p	UNKNOWN	SYBR	None	24.179	24.1051	0.401151	79.9698	0.1
173	H5	PCOS-NC3	miR-6818-5p	UNKNOWN	SYBR	None	24.4642	24.1051	0.401151	79.9698	0.1
174	H6	PCOS-NC3	miR-6818-5p	UNKNOWN	SYBR	None	23.6722	24.1051	0.401151	80.1017	0.1
196	I4	PCOS-NC4	miR-6818-5p	UNKNOWN	SYBR	None	23.9064	24.591	0.594741	80.2336	0.1
197	I5	PCOS-NC4	miR-6818-5p	UNKNOWN	SYBR	None	24.9811	24.591	0.594741	79.8379	0.1
198	I6	PCOS-NC4	miR-6818-5p	UNKNOWN	SYBR	None	24.8853	24.591	0.594741	79.9698	0.1
220	J4	PCOS-NC5	miR-6818-5p	UNKNOWN	SYBR	None	23.4545	23.5353	0.0870346	79.9698	0.1
221	J5	PCOS-NC5	miR-6818-5p	UNKNOWN	SYBR	None	23.6275	23.5353	0.0870346	79.8379	0.1
222	J6	PCOS-NC5	miR-6818-5p	UNKNOWN	SYBR	None	23.524	23.5353	0.0870346	79.9698	0.1
362	P2		miR-6818-5p	NTC	SYBR	None	Undetermined			61.7651	0.1
Analysis Type	Singleplex
Endogenous Control
RQ Min/Max Confidence Level	95.0
Reference Sample
Sample Name	Target Name	Ct Mean
PCOS-T1	miR-1299	22.3623
PCOS-T2	miR-1299	23.4107
PCOS-T3	miR-1299	22.4989
PCOS-T4	miR-1299	23.2627
PCOS-T5	miR-1299	24.9482
PCOS-NC1	miR-1299	20.5367
PCOS-NC2	miR-1299	25.6326
PCOS-NC3	miR-1299	24.1051
PCOS-NC4	miR-1299	24.591
PCOS-NC5	miR-1299	23.5353

## Sheet: miR-145-5p 
Block Type	384-Well Block
Chemistry	SYBR_GREEN
Experiment Name	2019-07-05 panhaitao
Experiment Run End Time	2019-07-06 02:11:50 AM CST
Experiment Type	Comparative Cт (ΔΔCт)
Instrument Type	QuantStudio(TM) 6 Flex System
Passive Reference	ROX
Quantification Cycle Method	Ct
Signal Smoothing On	true
Stage/ Cycle where Analysis is performed	Stage 2, Step 2
User Name
Well	Well Position	Sample Name	Target Name	Task	Reporter	Quencher	CT	Ct Mean	Ct SD	Tm1	Ct Threshold
7	A7	PCOS-T1	miR-145-5p	UNKNOWN	SYBR	None	27.1914	27.2551	0.0827517	77.991	0.1
8	A8	PCOS-T1	miR-145-5p	UNKNOWN	SYBR	None	27.2252	27.2551	0.0827517	77.991	0.1
9	A9	PCOS-T1	miR-145-5p	UNKNOWN	SYBR	None	27.3486	27.2551	0.0827517	77.991	0.1
31	B7	PCOS-T2	miR-145-5p	UNKNOWN	SYBR	None	27.1976	27.1865	0.0140097	77.8591	0.1
32	B8	PCOS-T2	miR-145-5p	UNKNOWN	SYBR	None	27.1911	27.1865	0.0140097	77.991	0.1
33	B9	PCOS-T2	miR-145-5p	UNKNOWN	SYBR	None	27.1708	27.1865	0.0140097	77.991	0.1
55	C7	PCOS-T3	miR-145-5p	UNKNOWN	SYBR	None	26.4983	26.4625	0.0430572	77.8591	0.1
56	C8	PCOS-T3	miR-145-5p	UNKNOWN	SYBR	None	26.4148	26.4625	0.0430572	77.991	0.1
57	C9	PCOS-T3	miR-145-5p	UNKNOWN	SYBR	None	26.4745	26.4625	0.0430572	77.991	0.1
79	D7	PCOS-T4	miR-145-5p	UNKNOWN	SYBR	None	28.3107	28.4953	0.165997	77.991	0.1
80	D8	PCOS-T4	miR-145-5p	UNKNOWN	SYBR	None	28.543	28.4953	0.165997	78.1229	0.1
81	D9	PCOS-T4	miR-145-5p	UNKNOWN	SYBR	None	28.6323	28.4953	0.165997	77.991	0.1
103	E7	PCOS-T5	miR-145-5p	UNKNOWN	SYBR	None	28.6462	28.3169	0.344299	77.991	0.1
104	E8	PCOS-T5	miR-145-5p	UNKNOWN	SYBR	None	27.9594	28.3169	0.344299	77.991	0.1
105	E9	PCOS-T5	miR-145-5p	UNKNOWN	SYBR	None	28.3451	28.3169	0.344299	77.991	0.1
127	F7	PCOS-NC1	miR-145-5p	UNKNOWN	SYBR	None	21.494	21.5806	0.105231	77.991	0.1
128	F8	PCOS-NC1	miR-145-5p	UNKNOWN	SYBR	None	21.6978	21.5806	0.105231	77.991	0.1
129	F9	PCOS-NC1	miR-145-5p	UNKNOWN	SYBR	None	21.5501	21.5806	0.105231	78.1229	0.1
151	G7	PCOS-NC2	miR-145-5p	UNKNOWN	SYBR	None	29.375	29.0048	0.325542	77.8591	0.1
152	G8	PCOS-NC2	miR-145-5p	UNKNOWN	SYBR	None	28.7631	29.0048	0.325542	77.991	0.1
153	G9	PCOS-NC2	miR-145-5p	UNKNOWN	SYBR	None	28.8763	29.0048	0.325542	77.991	0.1
175	H7	PCOS-NC3	miR-145-5p	UNKNOWN	SYBR	None	28.8167	28.6085	0.257015	78.1229	0.1
176	H8	PCOS-NC3	miR-145-5p	UNKNOWN	SYBR	None	28.6875	28.6085	0.257015	78.1229	0.1
177	H9	PCOS-NC3	miR-145-5p	UNKNOWN	SYBR	None	28.3212	28.6085	0.257015	78.1229	0.1
199	I7	PCOS-NC4	miR-145-5p	UNKNOWN	SYBR	None	25.2605	25.3047	0.18761	77.7272	0.1
200	I8	PCOS-NC4	miR-145-5p	UNKNOWN	SYBR	None	25.5105	25.3047	0.18761	77.991	0.1
201	I9	PCOS-NC4	miR-145-5p	UNKNOWN	SYBR	None	25.1432	25.3047	0.18761	78.1229	0.1
223	J7	PCOS-NC5	miR-145-5p	UNKNOWN	SYBR	None	24.6985	24.8691	0.237305	78.1229	0.1
224	J8	PCOS-NC5	miR-145-5p	UNKNOWN	SYBR	None	25.1401	24.8691	0.237305	77.991	0.1
225	J9	PCOS-NC5	miR-145-5p	UNKNOWN	SYBR	None	24.7688	24.8691	0.237305	78.1229	0.1
363	P3		miR-145-5p	NTC	SYBR	None	Undetermined			61.3694	0.1
Analysis Type	Singleplex
Endogenous Control
RQ Min/Max Confidence Level	95.0
Reference Sample
	27.2551
	27.1865
	26.4625
	28.4953
	28.3169
	21.5806
	29.0048
	28.6085
	25.3047
	24.8691

## Sheet: miR-192-5p
Block Type	384-Well Block
Chemistry	SYBR_GREEN
Experiment Name	2019-07-05 panhaitao
Experiment Run End Time	2019-07-06 02:11:50 AM CST
Experiment Type	Comparative Cт (ΔΔCт)
Instrument Type	QuantStudio(TM) 6 Flex System
Passive Reference	ROX
Quantification Cycle Method	Ct
Signal Smoothing On	true
Stage/ Cycle where Analysis is performed	Stage 2, Step 2
User Name
Well	Well Position	Sample Name	Target Name	Task	Reporter	Quencher	CT	Ct Mean	Ct SD	Tm1	Ct Threshold
16	A16	PCOS-T1	miR-192-5p	UNKNOWN	SYBR	None	27.498	27.3877	0.214933	79.574	0.1	27.3877
17	A17	PCOS-T1	miR-192-5p	UNKNOWN	SYBR	None	27.14	27.3877	0.214933	79.3102	0.1
18	A18	PCOS-T1	miR-192-5p	UNKNOWN	SYBR	None	27.525	27.3877	0.214933	79.574	0.1
40	B16	PCOS-T2	miR-192-5p	UNKNOWN	SYBR	None	26.9787	26.4697	0.441366	79.7059	0.1	26.4697
41	B17	PCOS-T2	miR-192-5p	UNKNOWN	SYBR	None	26.2363	26.4697	0.441366	79.0464	0.1
42	B18	PCOS-T2	miR-192-5p	UNKNOWN	SYBR	None	26.194	26.4697	0.441366	79.574	0.1
64	C16	PCOS-T3	miR-192-5p	UNKNOWN	SYBR	None	27.4522	27.4478	0.301987	79.574	0.1	27.4478
65	C17	PCOS-T3	miR-192-5p	UNKNOWN	SYBR	None	27.1437	27.4478	0.301987	79.3102	0.1
66	C18	PCOS-T3	miR-192-5p	UNKNOWN	SYBR	None	27.7476	27.4478	0.301987	79.4421	0.1
88	D16	PCOS-T4	miR-192-5p	UNKNOWN	SYBR	None	25.1182	25.1582	0.0900668	79.574	0.1	25.1582
89	D17	PCOS-T4	miR-192-5p	UNKNOWN	SYBR	None	25.0951	25.1582	0.0900668	79.574	0.1
90	D18	PCOS-T4	miR-192-5p	UNKNOWN	SYBR	None	25.2614	25.1582	0.0900668	79.574	0.1
112	E16	PCOS-T5	miR-192-5p	UNKNOWN	SYBR	None	26.7551	26.3546	0.571263	79.7059	0.1	26.3546
113	E17	PCOS-T5	miR-192-5p	UNKNOWN	SYBR	None	26.6082	26.3546	0.571263	79.7059	0.1
114	E18	PCOS-T5	miR-192-5p	UNKNOWN	SYBR	None	25.7004	26.3546	0.571263	79.7059	0.1
136	F16	PCOS-NC1	miR-192-5p	UNKNOWN	SYBR	None	24.3004	24.3492	0.179886	79.574	0.1
137	F17	PCOS-NC1	miR-192-5p	UNKNOWN	SYBR	None	24.5484	24.3492	0.179886	79.574	0.1
138	F18	PCOS-NC1	miR-192-5p	UNKNOWN	SYBR	None	24.1987	24.3492	0.179886	79.574	0.1
160	G16	PCOS-NC2	miR-192-5p	UNKNOWN	SYBR	None	26.1622	25.9996	0.258472	79.7059	0.1
161	G17	PCOS-NC2	miR-192-5p	UNKNOWN	SYBR	None	26.135	25.9996	0.258472	79.7059	0.1
162	G18	PCOS-NC2	miR-192-5p	UNKNOWN	SYBR	None	25.7015	25.9996	0.258472	79.7059	0.1
184	H16	PCOS-NC3	miR-192-5p	UNKNOWN	SYBR	None	22.565	22.4701	0.0967308	79.574	0.1
185	H17	PCOS-NC3	miR-192-5p	UNKNOWN	SYBR	None	22.4735	22.4701	0.0967308	79.7059	0.1
186	H18	PCOS-NC3	miR-192-5p	UNKNOWN	SYBR	None	22.3716	22.4701	0.0967308	79.8379	0.1
208	I16	PCOS-NC4	miR-192-5p	UNKNOWN	SYBR	None	26.0143	25.4415	0.525022	79.574	0.1
209	I17	PCOS-NC4	miR-192-5p	UNKNOWN	SYBR	None	24.9831	25.4415	0.525022	79.7059	0.1
210	I18	PCOS-NC4	miR-192-5p	UNKNOWN	SYBR	None	25.3272	25.4415	0.525022	79.574	0.1
232	J16	PCOS-NC5	miR-192-5p	UNKNOWN	SYBR	None	24.6866	24.5734	0.100947	79.3102	0.1
233	J17	PCOS-NC5	miR-192-5p	UNKNOWN	SYBR	None	24.5411	24.5734	0.100947	79.574	0.1
234	J18	PCOS-NC5	miR-192-5p	UNKNOWN	SYBR	None	24.4926	24.5734	0.100947	79.7059	0.1
366	P6		miR-192-5p	NTC	SYBR	None	Undetermined			61.3018	0.1
Analysis Type	Singleplex
Endogenous Control
RQ Min/Max Confidence Level	95.0
Reference Sample
		27.3877		27.3877
		26.4697		26.4697
		27.4478		27.4478
		25.1582		25.1582
		26.3546		26.3546
		24.3492
		25.9996
		22.4701
		25.4415
		24.5734

## Sheet: miR-1299 
Block Type	384-Well Block
Chemistry	SYBR_GREEN
Experiment Name	2019-07-09 panhaitao
Experiment Run End Time	2019-07-10 02:33:31 AM CST
Experiment Type	Comparative Cт (ΔΔCт)
Instrument Type	QuantStudio(TM) 6 Flex System
Passive Reference	ROX
Quantification Cycle Method	Ct
Signal Smoothing On	true
Stage/ Cycle where Analysis is performed	Stage 2, Step 2
User Name
Well	Well Position	Sample Name	Target Name	Task	Reporter	Quencher	CT	Ct Mean	Ct SD	Tm1	Ct Threshold
13	A13	PCOS-T1	miR-1299	UNKNOWN	SYBR	None	27.804	27.7535	0.112391	78.2432	0.1
14	A14	PCOS-T1	miR-1299	UNKNOWN	SYBR	None	27.6247	27.7535	0.112391	78.2432	0.1
15	A15	PCOS-T1	miR-1299	UNKNOWN	SYBR	None	27.8317	27.7535	0.112391	78.1114	0.1
37	B13	PCOS-T2	miR-1299	UNKNOWN	SYBR	None	26.8528	26.6028	0.217581	77.9796	0.1
38	B14	PCOS-T2	miR-1299	UNKNOWN	SYBR	None	26.4561	26.6028	0.217581	78.1114	0.1
39	B15	PCOS-T2	miR-1299	UNKNOWN	SYBR	None	26.4995	26.6028	0.217581	78.1114	0.1
61	C13	PCOS-T3	miR-1299	UNKNOWN	SYBR	None	26.6715	26.5549	0.186941	77.9796	0.1
62	C14	PCOS-T3	miR-1299	UNKNOWN	SYBR	None	26.3393	26.5549	0.186941	78.1114	0.1
63	C15	PCOS-T3	miR-1299	UNKNOWN	SYBR	None	26.6539	26.5549	0.186941	78.1114	0.1
85	D13	PCOS-T4	miR-1299	UNKNOWN	SYBR	None	24.917	24.8667	0.0537604	77.9796	0.1
86	D14	PCOS-T4	miR-1299	UNKNOWN	SYBR	None	24.8101	24.8667	0.0537604	77.9796	0.1
87	D15	PCOS-T4	miR-1299	UNKNOWN	SYBR	None	24.8729	24.8667	0.0537604	77.9796	0.1
109	E13	PCOS-T5	miR-1299	UNKNOWN	SYBR	None	27.869	27.8918	0.195926	78.1114	0.1
110	E14	PCOS-T5	miR-1299	UNKNOWN	SYBR	None	28.0982	27.8918	0.195926	78.1114	0.1
111	E15	PCOS-T5	miR-1299	UNKNOWN	SYBR	None	27.7083	27.8918	0.195926	78.1114	0.1
133	F13	PCOS-NC1	miR-1299	UNKNOWN	SYBR	None	28.9061	29.0887	0.17519	77.9796	0.1
134	F14	PCOS-NC1	miR-1299	UNKNOWN	SYBR	None	29.1046	29.0887	0.17519	77.9796	0.1
135	F15	PCOS-NC1	miR-1299	UNKNOWN	SYBR	None	29.2555	29.0887	0.17519	77.9796	0.1
157	G13	PCOS-NC2	miR-1299	UNKNOWN	SYBR	None	28.5624	28.6022	0.0824876	77.9796	0.1
158	G14	PCOS-NC2	miR-1299	UNKNOWN	SYBR	None	28.6971	28.6022	0.0824876	77.8477	0.1
159	G15	PCOS-NC2	miR-1299	UNKNOWN	SYBR	None	28.5472	28.6022	0.0824876	77.8477	0.1
181	H13	PCOS-NC3	miR-1299	UNKNOWN	SYBR	None	27.4703	27.8564	0.365311	78.1114	0.1
182	H14	PCOS-NC3	miR-1299	UNKNOWN	SYBR	None	28.1967	27.8564	0.365311	78.1114	0.1
183	H15	PCOS-NC3	miR-1299	UNKNOWN	SYBR	None	27.9021	27.8564	0.365311	78.1114	0.1
205	I13	PCOS-NC4	miR-1299	UNKNOWN	SYBR	None	29.1217	28.9611	0.254683	78.1114	0.1
206	I14	PCOS-NC4	miR-1299	UNKNOWN	SYBR	None	28.6675	28.9611	0.254683	78.1114	0.1
207	I15	PCOS-NC4	miR-1299	UNKNOWN	SYBR	None	29.0942	28.9611	0.254683	77.9796	0.1
229	J13	PCOS-NC5	miR-1299	UNKNOWN	SYBR	None	28.5004	28.4444	0.110783	78.1114	0.1
230	J14	PCOS-NC5	miR-1299	UNKNOWN	SYBR	None	28.3168	28.4444	0.110783	78.1114	0.1
231	J15	PCOS-NC5	miR-1299	UNKNOWN	SYBR	None	28.516	28.4444	0.110783	78.1114	0.1
275	L11		miR-1299	NTC	SYBR	None	Undetermined			61.3674	0.1
Analysis Type	Singleplex
Endogenous Control	tsRNA-23748
RQ Min/Max Confidence Level	95.0
Reference Sample	PCOS-T2
		27.7535
		26.6028
		26.5549
		24.8667
		27.8918
		29.0887
		28.6022
		27.8564
		28.9611
		28.4444

## Sheet: analysis
Sample Name	Target Name	Cт	Sample Name	Target Name	Cт	△CT	averagr ΔCт	△△CT	2^-△△CT	SD	TTEST
C1	miR-6818-5p	20.5367	C1	5S	14.5152	6.02152	8.36364	-2.34212	0.197221	1.61914	0.589662
C2	miR-6818-5p	25.6326	C2	5S	15.4089	10.2237		10.2237
C3	miR-6818-5p	24.1051	C3	5S	14.9349	9.17025		9.17025
C4	miR-6818-5p	24.591	C4	5S	15.7423	8.84861		8.84861
C5	miR-6818-5p	23.5353	C5	5S	15.9812	7.55412		7.55412
T1	miR-6818-5p	22.3623	T1	5S	15.7613	6.60101		6.60101	0.0103014	0.945002
T2	miR-6818-5p	23.4107	T2	5S	15.0161	8.39459		8.39459
T3	miR-6818-5p	22.4989	T3	5S	15.3187	7.18027		7.18027
T4	miR-6818-5p	23.2627	T4	5S	14.5288	8.73386		8.73386
T5	miR-6818-5p	24.9482	T5	5S	16.3947	8.5535		8.5535
Sample Name	Target Name	Cт	Sample Name	Target Name	Cт	△CT	averagr ΔCт	△△CT	2^-△△CT	SD	TTEST
C1	miR-145-5p	21.5806	C1	5S	14.5152	7.06542	10.557	0	1	2.95441	0.294016
C2	miR-145-5p	29.0048	C2	5S	15.4089	13.5959
C3	miR-145-5p	28.6085	C3	5S	14.9349	13.6736
C4	miR-145-5p	25.3047	C4	5S	15.7423	9.5624
C5	miR-145-5p	24.8691	C5	5S	15.9812	8.88794
T1	miR-145-5p	27.2551	T1	5S	15.7613	11.4938	12.1394	1.58233	0.333943	1.0948
T2	miR-145-5p	27.1865	T2	5S	15.0161	12.1705
T3	miR-145-5p	26.4625	T3	5S	15.3187	11.1439
T4	miR-145-5p	28.4953	T4	5S	14.5288	13.9665
T5	miR-145-5p	28.3169	T5	5S	16.3947	11.9222
Sample Name	Target Name	Cт	Sample Name	Target Name	Cт	△CT	averagr ΔCт	△△CT	2^-△△CT	SD	TTEST
C1	miR-192-5p	24.3492	C1	5S	14.5152	9.83397	9.25024	0	1	1.19513	0.01993
C2	miR-192-5p	25.9996	C2	5S	15.4089	10.5907
C3	miR-192-5p	22.4701	C3	5S	14.9349	7.5352
C4	miR-192-5p	25.4415	C4	5S	15.7423	9.69917
C5	miR-192-5p	24.5734	C5	5S	15.9812	8.59221
T1	miR-192-5p	27.3877	T1	5S	15.7613	11.6264	11.1597	1.90946	0.266193	0.860932
T2	miR-192-5p	26.4697	T2	5S	15.0161	11.4536
T3	miR-192-5p	27.4478	T3	5S	15.3187	12.1292
T4	miR-192-5p	25.1582	T4	5S	14.5288	10.6294
T5	miR-192-5p	26.3546	T5	5S	16.3947	9.9599
Sample Name	Target Name	Cт	Sample Name	Target Name	Cт	△CT	averagr ΔCт	△△CT	2^-△△CT	SD	TTEST
C1	miR-1299	29.0887	C1	5S	14.5152	14.5735	13.2741	0	1	0.787386	0.00246513
C2	miR-1299	28.6022	C2	5S	15.4089	13.1933
C3	miR-1299	27.8564	C3	5S	14.9349	12.9215
C4	miR-1299	28.9611	C4	5S	15.7423	13.2188
C5	miR-1299	28.4444	C5	5S	15.9812	12.4632
T1	miR-1299	27.7535	T1	5S	15.7613	11.9922	11.33	-1.94402	3.84777	0.617572
T2	miR-1299	26.6028	T2	5S	15.0161	11.5867
T3	miR-1299	26.5549	T3	5S	15.3187	11.2362
T4	miR-1299	24.8667	T4	5S	14.5288	10.3378
T5	miR-1299	27.8918	T5	5S	16.3947	11.4971
