# Supplementary material for: High throughput microRNAs sequencing profile of serum exosomes in women with and without polycystic ovarian syndrome
Source: PeerJ. 2021 Mar 12;9:e10998. doi: 10.7717/peerj.10998 (PMC7958896; doi:10.7717/peerj.10998)
Supplement: Supplemental Information 3 [file peerj-09-10998-s003.xls]

## Sheet: Sheet1
Table 1. Clinical characteristics of PCOS and normal patients
NO.	Age	BMI	FSH	LH	AMH	PRL	E2	Progesterone	Testosterone
PCOS-1	29	19.3	7.61	18.19	11.64	11.24	61.9	0.66	0.52
PCOS-2	29	20.2	8.97	13.96	11.05	19.13	49.39	0.81	0.74
PCOS-3	26	21.6	7.26	17.84	12.72	21.23	81.55	0.54	0.61
PCOS-4	30	22.3	7.83	15.52	9.8	13.32	63.59	0.88	0.98
CONTROL-1	27	20.5	5.58	8.75	5.39	12.54	53.16	0.63	0.36
CONTROL-2	26	21.3	5.22	6.55	4.86	18.17	68.64	0.25	0.49
CONTROL-3	28	19.9	5.45	10.96	7.71	13.26	43.8	0.34	0.39
CONTROL-4	29	20.1	5.99	7.93	6.86	19.36	49.73	0.87	0.26
average	28.5	20.85	7.9175	16.3775	11.3025	16.23	64.1075	0.7225	0.7125
STDEV	1.73205	1.35277	0.739882	2.00031	1.21717	4.71799	13.2412	0.152398	0.199896
average	27.5	20.45	5.56	8.5475	6.205	15.33	53.8325	0.5225	0.375
STDEV	1.29099	0.619139	0.323007	1.84684	1.31242	3.17866	10.6018	0.282769	0.0946925
P-value	0.390259	0.610111	0.00111063	0.0012022	0.00126516	0.741779	0.27125	0.259467	0.0224636
