# Supplementary material for: High throughput microRNAs sequencing profile of serum exosomes in women with and without polycystic ovarian syndrome
Source: PeerJ. 2021 Mar 12;9:e10998. doi: 10.7717/peerj.10998 (PMC7958896; doi:10.7717/peerj.10998)
Supplement: Supplemental Information 4 [file peerj-09-10998-s004.xlsx]

## Sheet: Supplemental Table S1
AccID	log2FC	Pvalue	FDR	Pcos1	Pcos2	Pcos3	Pcos4	NC1	NC2	NC3	NC4
hsa-miR-497-3p	4.39487	0.00100422	0.24369	13	3	6	5	0	0	0	0
hsa-miR-8089	4.07846	3.43815e-08	5.00594e-05	483	64	22	75	4	4	6	5
hsa-miR-128-2-5p	3.94635	0.245934	0.992536	0	12	0	1	0	0	0	0
hsa-miR-6505-3p	3.74403	0.0043575	0.576775	9	2	8	8	0	0	0	1
hsa-miR-4302	3.64442	0.284523	0.992536	14	4	0	0	0	0	0	0
hsa-miR-4436b-3p	3.63771	1	1	8	2	8	181	2	1	4	4
hsa-miR-4292	3.57594	0.0188565	0.930294	6	1	5	3	0	0	0	0
hsa-miR-4418	3.50417	0.00283752	0.516429	12	2	44	8	0	0	3	1
hsa-miR-4649-5p	3.35777	0.0152671	0.930294	14	2	3	4	0	1	0	0
hsa-miR-6824-5p	3.31624	0.0334033	0.943954	5	3	2	2	0	0	0	0
hsa-miR-6763-3p	3.29609	0.0789209	0.992536	0	3	6	1	0	0	0	0
hsa-miR-1193	3.2545	0.0825095	0.992536	11	2	1	0	0	0	0	0
hsa-miR-6781-5p	3.23401	0.021085	0.930294	4	2	4	8	0	0	1	0
hsa-miR-4768-3p	3.20117	0.0529799	0.943954	6	1	4	1	0	0	0	0
hsa-miR-4300	3.1561	8.12073e-05	0.0394126	23	24	50	12	1	3	1	3
hsa-miR-6856-3p	3.12901	0.0987822	0.992536	10	1	0	2	0	0	0	0
hsa-miR-4687-5p	3.12725	0.0253315	0.943954	3	4	4	5	0	0	1	0
hsa-miR-1183	3.06037	0.00415643	0.576775	23	4	9	8	1	0	1	1
hsa-miR-488-5p	3.00826	0.100869	0.992536	6	0	2	3	0	0	0	0
hsa-miR-449c-5p	2.88204	1	1	0	0	41	2	0	1	1	2
hsa-miR-4748	2.81517	0.151326	0.992536	7	1	0	2	0	0	0	0
hsa-miR-8069	2.77498	0.0123136	0.930294	10	6	11	5	0	0	1	2
hsa-miR-4727-5p	2.77495	0.135024	0.992536	15	0	3	0	0	0	0	1
hsa-miR-4487	2.6232	0.0549023	0.943954	4	4	7	3	0	0	2	0
hsa-miR-6774-3p	2.61903	0.126164	0.992536	3	1	8	0	0	0	0	1
hsa-miR-4693-3p	2.55094	1	1	54	11	20	479	7	13	29	18
hsa-miR-3691-3p	2.54047	0.11705	0.992536	7	0	2	4	1	0	0	0
hsa-miR-548d-3p	2.46193	0.0964646	0.992536	15	1	5	1	0	0	0	2
hsa-miR-3686	2.40151	0.0306854	0.943954	13	7	13	4	4	0	0	0
hsa-miR-6782-5p	2.3805	0.0152523	0.930294	16	5	9	6	1	1	0	2
hsa-miR-432-3p	2.30813	0.102148	0.992536	7	2	5	2	0	0	2	0
hsa-miR-4636	2.2513	0.0321201	0.943954	21	7	3	3	1	1	1	1
hsa-miR-5584-5p	2.23929	0.19229	0.992536	7	0	1	3	1	0	0	0
hsa-miR-3163	2.15871	0.166131	0.992536	7	6	1	0	0	0	1	1
hsa-miR-1200	2.10646	0.160203	0.992536	4	4	0	5	0	0	1	1
hsa-miR-6740-5p	2.09393	0.0435839	0.943954	11	7	3	6	1	1	2	0
hsa-miR-6134	2.07127	0.0339506	0.943954	22	8	8	5	0	0	1	5
hsa-miR-2682-3p	2.04926	0.248044	0.992536	5	1	0	3	0	0	1	0
hsa-miR-1255b-2-3p	2.00827	0.170072	0.992536	1	5	2	3	0	1	1	0
hsa-miR-1299	1.99191	0.000294608	0.107237	1184	73	466	529	74	78	112	45
hsa-miR-5572	1.98945	0.0862882	0.992536	21	2	3	5	0	1	0	3
hsa-miR-6744-5p	1.98245	0.132685	0.992536	5	3	20	0	0	0	3	2
hsa-miR-504-3p	1.94297	0.125001	0.992536	1	5	3	7	0	1	1	1
hsa-miR-4456	1.93657	0.181955	0.992536	9	0	3	9	0	3	0	0
hsa-miR-6746-3p	1.9268	0.0539182	0.943954	8	5	12	6	2	0	0	3
hsa-miR-6743-3p	1.88313	0.0787445	0.992536	2	5	7	18	0	1	1	4
hsa-miR-765	1.84077	0.0913566	0.992536	4	3	3	17	2	0	2	1
hsa-miR-6818-5p	1.83744	1.36875e-05	0.00996448	631	185	201	168	28	30	71	65
hsa-miR-1470	1.80171	0.100056	0.992536	8	1	8	6	0	1	1	2
hsa-miR-1910-3p	1.79888	0.152934	0.992536	4	5	4	2	0	1	2	0
hsa-miR-6731-5p	1.77382	0.0512155	0.943954	7	7	9	11	1	0	5	1
hsa-miR-3911	1.7672	0.0513272	0.943954	6	6	6	13	2	1	2	1
hsa-miR-631	1.76592	0.163947	0.992536	3	2	3	8	0	1	0	2
hsa-miR-6754-5p	1.76099	0.0987335	0.992536	13	4	4	3	2	1	1	0
hsa-miR-593-5p	1.75939	0.3986	0.992536	8	0	0	1	0	1	0	0
hsa-miR-1250-3p	1.71388	0.258471	0.992536	7	2	1	2	2	0	0	0
hsa-miR-7113-5p	1.71193	0.0295243	0.943954	26	12	5	64	2	8	6	5
hsa-miR-874-5p	1.70857	0.231764	0.992536	0	1	9	4	0	1	1	1
hsa-miR-6795-5p	1.67588	0.166468	0.992536	8	3	2	3	0	1	1	1
hsa-miR-5186	1.66914	0.297717	0.992536	1	5	1	2	0	2	0	0
hsa-miR-4489	1.63069	0.119347	0.992536	11	7	1	7	1	2	0	2
hsa-miR-3121-3p	1.62445	0.198553	0.992536	6	5	2	2	0	2	0	1
hsa-miR-3663-3p	1.59936	0.149419	0.992536	9	1	7	4	1	2	1	0
hsa-miR-6748-3p	1.57125	0.146184	0.992536	3	7	9	2	1	0	2	2
hsa-miR-520h	1.56444	0.328166	0.992536	7	0	3	1	0	0	1	1
hsa-miR-6730-3p	1.54463	0.19681	0.992536	6	2	4	3	1	1	0	1
hsa-miR-6849-5p	1.53614	0.15681	0.992536	10	1	3	15	0	1	1	4
hsa-miR-4778-3p	1.53011	0.338903	0.992536	1	1	2	5	0	0	0	2
hsa-miR-6869-3p	1.521	0.339814	0.992536	7	1	3	0	0	1	0	1
hsa-miR-3185	1.49142	0.145235	0.992536	11	2	4	7	0	1	1	3
hsa-miR-6720-5p	1.48354	0.281704	0.992536	5	0	4	5	0	2	1	0
hsa-miR-1233-5p	1.47284	0.113875	0.992536	9	3	7	8	1	3	2	0
hsa-miR-4306	1.46459	0.01476	0.930294	25	11	16	15	3	3	5	4
hsa-miR-5695	1.4628	0.0188089	0.930294	68	19	12	19	5	2	12	6
hsa-miR-615-3p	1.45719	0.0863182	0.992536	16	3	10	7	0	2	4	2
hsa-miR-4479	1.43796	0.164829	0.992536	8	2	9	3	1	0	2	2
hsa-miR-1909-5p	1.42287	0.011716	0.930294	326	139	71	361	68	57	52	21
hsa-miR-663b	1.42275	0.25799	0.992536	2	1	8	6	1	0	0	3
hsa-miR-585-5p	1.41796	0.369476	0.992536	6	1	2	1	0	0	0	2
hsa-miR-4504	1.40751	0.0326723	0.943954	58	38	15	11	5	3	16	6
hsa-miR-31-5p	1.39874	0.0374898	0.943954	69	37	174	28	7	9	45	21
hsa-miR-582-3p	1.37416	0.0706513	0.992536	5572	4077	736	582	1343	334	406	307
hsa-miR-449a	1.37314	0.293484	0.992536	6	0	19	4	0	0	1	6
hsa-miR-433-5p	1.37169	0.394519	0.992536	5	3	1	0	1	0	0	1
hsa-miR-6887-3p	1.36935	0.234735	0.992536	2	17	2	1	1	1	3	2
hsa-miR-4793-3p	1.36727	0.0696784	0.992536	26	24	5	71	10	4	14	5
hsa-miR-7852-3p	1.36283	0.401015	0.992536	6	0	7	0	1	0	2	0
hsa-miR-561-5p	1.35762	0.35244	0.992536	8	0	1	5	0	2	1	0
hsa-miR-4669	1.34673	0.111601	0.992536	23	21	16	6	0	4	14	1
hsa-miR-1229-5p	1.33559	0.0452904	0.943954	59	25	9	10	7	4	5	7
hsa-miR-6809-5p	1.30046	0.136959	0.992536	10	9	4	8	2	4	2	0
hsa-miR-101-5p	1.28906	0.113319	0.992536	11	8	34	8	1	2	12	3
hsa-miR-3614-5p	1.2837	0.343115	0.992536	3	2	5	1	1	0	2	0
hsa-miR-2277-3p	1.28024	0.0592457	0.947931	20	13	16	13	3	1	3	9
hsa-miR-1915-3p	1.26983	0.315916	0.992536	3	3	9	1	3	1	0	0
hsa-miR-4674	1.26731	0.219109	0.992536	5	3	5	6	1	0	1	3
hsa-miR-520a-3p	1.24757	0.307785	0.992536	8	0	3	6	1	2	1	0
hsa-miR-4690-3p	1.23204	0.0431761	0.943954	31	11	52	23	7	8	14	3
hsa-miR-648	1.2279	0.335835	0.992536	5	0	8	2	0	1	2	1
hsa-miR-636	1.22631	0.15697	0.992536	4	12	7	8	3	3	1	2
hsa-miR-124-5p	1.21634	0.305475	0.992536	12	2	1	3	1	2	0	1
hsa-miR-662	1.21053	0.453885	0.992536	3	0	2	5	0	0	3	0
hsa-miR-1289	1.20002	0.180705	0.992536	8	5	33	2	3	2	6	3
hsa-miR-8082	1.2	0.179877	0.992536	10	5	6	6	1	3	0	3
hsa-miR-31-3p	1.19696	0.268751	0.992536	3	6	53	7	0	1	18	5
hsa-miR-4638-5p	1.18665	0.274826	0.992536	10	8	1	2	1	0	3	2
hsa-miR-6085	1.18605	0.299641	0.992536	3	2	5	4	0	1	1	2
hsa-miR-3155b	1.18201	0.228095	0.992536	17	2	4	3	2	2	1	1
hsa-miR-542-3p	1.16959	0.0337846	0.943954	251	175	93	34	41	34	39	36
hsa-miR-6775-5p	1.16716	0.350084	0.992536	5	4	5	0	0	1	1	2
hsa-miR-337-5p	1.16697	0.055626	0.943954	30	11	19	8	4	5	5	4
hsa-miR-4500	1.15421	0.284061	0.992536	9	8	7	1	0	2	6	0
hsa-miR-5706	1.15262	0.286144	0.992536	9	4	3	4	0	0	5	1
hsa-miR-645	1.13924	0.365644	0.992536	3	4	5	1	0	0	1	3
hsa-miR-548t-5p	1.1373	0.191536	0.992536	9	6	6	7	4	0	3	1
hsa-miR-622	1.13601	0.0934419	0.992536	48	31	10	115	17	16	12	13
hsa-miR-3117-3p	1.13554	0.315986	0.992536	2	1	12	4	0	1	3	2
hsa-miR-6089	1.12345	0.18171	0.992536	7	8	16	9	1	2	1	8
hsa-miR-6130	1.12263	0.0132477	0.930294	80	29	38	24	10	12	12	12
hsa-miR-183-3p	1.11553	0.24683	0.992536	6	4	7	5	0	1	5	1
hsa-miR-6795-3p	1.10701	0.342296	0.992536	5	3	5	1	1	2	1	0
hsa-miR-4328	1.1025	0.557109	0.992536	8	0	1	0	0	0	1	1
hsa-miR-4784	1.10107	0.259983	0.992536	11	1	6	7	2	1	4	0
hsa-miR-5698	1.10102	0.230536	0.992536	7	4	4	9	2	3	2	0
hsa-miR-6800-5p	1.09722	0.392477	0.992536	11	0	2	3	1	0	2	1
hsa-miR-6842-5p	1.08199	0.182934	0.992536	30	15	3	13	7	4	6	0
hsa-miR-3169	1.07902	0.319939	0.992536	10	3	1	5	1	2	0	2
hsa-miR-6815-5p	1.07879	0.359533	0.992536	6	1	2	5	1	1	2	0
hsa-miR-4745-5p	1.07178	0.35918	0.992536	6	1	6	2	2	1	0	1
hsa-miR-3175	1.06775	0.358209	0.992536	6	0	4	12	1	0	5	1
hsa-miR-607	1.05732	0.293159	0.992536	10	5	4	7	5	2	0	0
hsa-miR-1538	1.0516	0.117437	0.992536	13	8	15	10	2	4	3	5
hsa-miR-4257	1.04978	0.191117	0.992536	24	2	9	7	3	4	3	1
hsa-miR-342-5p	1.04673	0.0536064	0.943954	1312	571	172	881	271	228	207	114
hsa-miR-668-3p	1.04481	0.43974	0.992536	6	2	2	1	0	2	0	1
hsa-miR-758-5p	1.04355	0.269986	0.992536	7	3	2	32	4	1	5	4
hsa-miR-4483	1.03956	0.421438	0.992536	3	1	6	2	0	0	3	1
hsa-miR-487b-5p	1.03518	0.572437	0.992536	6	0	2	0	0	0	1	1
hsa-miR-4804-5p	1.03459	0.257303	0.992536	15	3	7	4	4	1	3	0
hsa-miR-6735-5p	1.02465	0.269672	0.992536	14	1	3	11	2	3	2	1
hsa-miR-193b-5p	1.0226	0.145459	0.992536	110	28	23	57	3	36	19	4
hsa-miR-6860	1.01543	0.40626	0.992536	2	1	6	3	0	1	2	1
hsa-miR-5090	1.01137	0.47365	0.992536	2	1	6	1	1	2	0	0
hsa-let-7g-3p	1.01053	0.0899281	0.992536	24	36	79	36	18	6	19	16
hsa-miR-4268	1.01015	0.210783	0.992536	10	4	8	11	5	1	3	1
hsa-miR-4474-3p	1.00809	0.320488	0.992536	13	4	6	1	0	1	2	4
hsa-miR-6773-5p	1.00562	0.588763	0.992536	8	0	0	1	1	0	0	1
hsa-miR-6777-5p	0.997026	0.289381	0.992536	6	3	6	4	1	1	2	2
hsa-miR-4443	0.996864	0.103891	0.992536	72	69	323	197	34	26	93	79
hsa-miR-3972	0.98638	0.343469	0.992536	13	2	4	2	1	2	3	0
hsa-miR-6131	0.986225	0.101394	0.992536	5007	539	591	2667	819	542	367	502
hsa-miR-4675	0.984152	0.120739	0.992536	113	27	9	51	13	8	11	23
hsa-miR-3682-3p	0.983931	0.256745	0.992536	18	4	2	7	2	2	4	1
hsa-miR-675-3p	0.983256	0.341697	0.992536	10	8	4	3	0	6	2	0
hsa-miR-6750-5p	0.975243	0.263531	0.992536	10	4	2	10	2	2	2	2
hsa-miR-5708	0.971015	0.438699	0.992536	4	2	5	1	0	0	2	2
hsa-miR-15a-3p	0.968444	0.405949	0.992536	3	1	12	5	0	5	2	0
hsa-miR-4688	0.966954	0.216536	0.992536	15	5	6	6	2	1	5	2
hsa-miR-3179	0.961771	0.318799	0.992536	5	9	3	6	4	1	3	0
hsa-miR-590-5p	0.960813	0.421734	0.992536	1	3	11	1	0	1	3	2
hsa-miR-4787-5p	0.960247	0.105539	0.992536	61	14	16	15	3	5	10	13
hsa-miR-7854-3p	0.958937	0.487634	0.992536	8	1	1	1	1	0	1	1
hsa-miR-1247-3p	0.952585	0.145437	0.992536	55	31	202	188	27	17	87	43
hsa-miR-15a-5p	0.948032	0.0947437	0.992536	542	567	1994	538	163	210	554	406
hsa-let-7b-5p	0.947559	0.0185161	0.930294	152277	80152	45641	70344	29423	27180	37718	15613
hsa-miR-34b-3p	0.944103	0.492711	0.992536	5	2	6	0	0	1	0	3
hsa-miR-1199-5p	0.942156	0.334921	0.992536	6	3	13	2	0	3	2	3
hsa-miR-6821-5p	0.940276	0.324603	0.992536	4	2	11	4	2	1	2	2
hsa-miR-3653-3p	0.926144	0.178926	0.992536	137	113	18	18	11	18	45	27
hsa-miR-4772-5p	0.922113	0.160279	0.992536	39	18	7	7	5	5	7	5
hsa-miR-4322	0.915643	0.331776	0.992536	5	2	8	13	0	1	4	5
hsa-miR-7845-5p	0.912241	0.391131	0.992536	7	4	3	2	1	2	0	2
hsa-miR-4510	0.907601	0.247933	0.992536	43	3	7	7	4	6	4	2
hsa-miR-551b-3p	0.907033	0.419816	0.992536	4	1	15	1	1	1	1	4
hsa-miR-3189-5p	0.906488	0.276129	0.992536	11	5	5	4	2	2	2	2
hsa-miR-144-5p	0.898921	0.151574	0.992536	2380	3095	5548	1789	492	370	3299	1126
hsa-miR-6504-3p	0.892046	0.446239	0.992536	5	3	2	2	0	2	1	1
hsa-miR-5195-5p	0.888401	0.512471	0.992536	5	2	1	2	2	0	0	1
hsa-miR-4700-3p	0.88834	0.389368	0.992536	7	5	3	5	0	0	2	5
hsa-miR-675-5p	0.883916	0.246133	0.992536	9	5	9	27	1	6	6	5
hsa-miR-6128	0.883714	0.570079	0.992536	2	5	0	1	2	0	1	0
hsa-miR-7848-3p	0.87916	0.279665	0.992536	10	8	6	23	4	2	1	9
hsa-miR-4726-5p	0.877694	0.393353	0.992536	3	1	5	8	1	1	2	2
hsa-miR-329-5p	0.875986	0.325662	0.992536	18	4	2	11	2	5	4	0
hsa-miR-6802-5p	0.875028	0.202579	0.992536	17	5	8	21	2	5	4	6
hsa-miR-4799-5p	0.86628	0.267887	0.992536	22	10	2	22	6	4	8	1
hsa-miR-6873-3p	0.865147	0.49543	0.992536	1	3	1	6	1	1	0	2
hsa-miR-7153-3p	0.859216	0.574984	0.992536	7	1	0	8	0	0	0	5
hsa-miR-4455	0.842241	0.512723	0.992536	8	0	3	2	1	1	2	0
hsa-miR-6754-3p	0.840753	0.320502	0.992536	17	2	7	8	2	0	4	5
hsa-miR-579-3p	0.835742	0.40638	0.992536	7	3	7	1	2	1	1	2
hsa-miR-4671-5p	0.832091	0.498368	0.992536	6	2	2	2	2	0	2	0
hsa-miR-509-5p	0.823931	0.415799	0.992536	12	3	1	7	1	0	5	2
hsa-miR-372-3p	0.823794	0.432622	0.992536	4	3	2	5	1	1	1	2
hsa-miR-2113	0.822816	0.549194	0.992536	2	1	1	6	0	0	3	1
hsa-miR-193a-3p	0.819828	0.252264	0.992536	19	17	31	6	12	5	7	2
hsa-miR-16-5p	0.819226	0.0680709	0.992536	13996	12518	32106	11747	4796	5399	9831	7036
hsa-miR-4417	0.815101	0.440096	0.992536	2	1	8	5	1	1	2	2
hsa-miR-3619-3p	0.815094	0.427159	0.992536	11	3	2	6	1	1	0	5
hsa-miR-4283	0.81433	0.363922	0.992536	10	3	4	4	2	2	2	1
hsa-miR-4656	0.812152	0.387468	0.992536	9	2	4	6	1	1	1	4
hsa-miR-6785-5p	0.811511	0.278318	0.992536	11	12	6	10	4	3	1	6
hsa-miR-2117	0.811145	0.603182	0.992536	4	0	5	0	0	1	1	1
hsa-miR-6751-3p	0.808166	0.546818	0.992536	11	0	1	6	2	3	0	0
hsa-miR-6748-5p	0.80437	0.576997	0.992536	6	0	0	7	1	1	0	2
hsa-miR-450a-2-3p	0.798885	0.335558	0.992536	37	23	4	8	13	3	7	1
hsa-miR-4764-5p	0.795513	0.473167	0.992536	2	2	7	2	1	1	2	1
hsa-miR-6734-5p	0.793483	0.19127	0.992536	24	11	10	24	9	6	6	3
hsa-miR-106b-5p	0.792672	0.165942	0.992536	1804	1826	5077	1349	421	520	1998	1246
hsa-miR-33a-5p	0.788954	0.233837	0.992536	34	10	9	8	4	4	11	2
hsa-miR-7150	0.788701	0.375037	0.992536	10	3	5	7	3	0	5	1
hsa-miR-877-3p	0.787903	0.39105	0.992536	15	8	0	14	5	1	4	3
hsa-miR-5003-3p	0.786349	0.355348	0.992536	8	2	5	10	1	3	3	2
hsa-miR-3936	0.785686	0.474728	0.992536	9	1	5	2	0	1	4	1
hsa-miR-6809-3p	0.784164	0.59815	0.992536	1	6	0	2	2	0	2	0
hsa-miR-18a-5p	0.780795	0.136328	0.992536	103	99	213	64	28	25	74	65
hsa-miR-548b-3p	0.77754	0.503773	0.992536	2	1	10	2	0	2	3	1
hsa-miR-4652-3p	0.775747	0.462744	0.992536	5	4	1	9	2	0	1	4
hsa-miR-149-3p	0.773617	0.112819	0.992536	168	40	34	63	33	21	21	21
hsa-miR-3200-3p	0.770965	0.149036	0.992536	26	47	70	35	13	15	24	21
hsa-miR-150-3p	0.770822	0.0521579	0.943954	551	324	177	433	145	118	177	102
hsa-miR-624-5p	0.770234	0.0517098	0.943954	58	36	46	37	13	15	22	16
hsa-miR-500b-3p	0.767276	0.310911	0.992536	15	7	8	5	1	1	6	5
hsa-miR-1237-5p	0.766215	0.545739	0.992536	6	1	10	0	0	1	1	4
hsa-miR-6806-5p	0.764659	0.630459	0.992536	8	0	1	1	0	0	1	2
hsa-miR-4725-3p	0.762499	0.53053	0.992536	3	1	2	5	1	2	1	0
hsa-miR-4323	0.760158	0.55631	0.992536	1	7	7	1	0	0	1	6
hsa-miR-4763-3p	0.756088	0.311611	0.992536	8	3	15	11	4	2	5	3
hsa-miR-4505	0.747491	0.594378	0.992536	1	1	1	5	1	1	0	1
hsa-miR-32-5p	0.746754	0.044159	0.943954	914	621	1076	516	194	243	498	307
hsa-miR-7108-3p	0.745766	0.38764	0.992536	4	3	9	19	5	1	6	2
hsa-miR-4523	0.744541	0.377263	0.992536	23	3	2	25	1	4	7	7
hsa-miR-4739	0.741049	0.417269	0.992536	6	1	7	8	3	1	2	2
hsa-miR-451a	0.74012	0.0711495	0.992536	508856	482335	697699	429098	131890	183298	423704	154008
hsa-miR-4444	0.735251	0.264435	0.992536	15	8	14	9	7	2	5	3
hsa-miR-6801-5p	0.732531	0.45604	0.992536	2	3	5	8	3	1	1	2
hsa-miR-5187-3p	0.73202	0.430643	0.992536	4	7	5	5	0	1	4	4
hsa-miR-4732-5p	0.731601	0.141768	0.992536	271	136	55	182	66	42	103	31
hsa-miR-1273g-5p	0.73076	0.628191	0.992536	5	3	0	1	2	0	0	1
hsa-miR-6772-5p	0.729095	0.288726	0.992536	10	5	15	11	3	2	6	5
hsa-miR-6512-3p	0.728565	0.53963	0.992536	16	3	2	2	0	6	0	1
hsa-miR-943	0.724564	0.319364	0.992536	15	6	6	11	1	3	3	7
hsa-miR-3200-5p	0.722944	0.263595	0.992536	14	13	20	7	2	6	9	5
hsa-let-7a-5p	0.722684	0.11447	0.992536	205495	104284	53345	77374	56010	32646	42260	24257
hsa-miR-3165	0.721289	0.452855	0.992536	9	9	0	15	3	1	8	2
hsa-miR-509-3p	0.712036	0.183628	0.992536	53	12	20	23	6	4	15	14
hsa-miR-2278	0.711489	0.342701	0.992536	7	5	12	9	4	1	4	4
hsa-miR-8073	0.71146	0.648639	0.992536	5	2	0	1	0	1	2	0
hsa-miR-4515	0.711141	0.582905	0.992536	6	2	4	2	0	0	0	5
hsa-miR-6762-5p	0.7079	0.363041	0.992536	33	5	6	4	4	4	2	5
hsa-miR-182-5p	0.7079	0.130437	0.992536	16053	14909	15110	9449	2822	3102	13173	5396
hsa-miR-103a-2-5p	0.705123	0.202861	0.992536	21	25	55	23	9	12	14	16
hsa-miR-188-5p	0.702227	0.351439	0.992536	6	7	12	15	3	3	2	8
hsa-miR-4691-5p	0.701776	0.561115	0.992536	5	1	2	3	0	2	1	1
hsa-miR-2861	0.700762	0.264348	0.992536	28	12	21	68	10	12	25	6
hsa-miR-1255b-5p	0.700366	0.077719	0.992536	214	193	98	151	59	55	87	64
hsa-miR-665	0.698777	0.307862	0.992536	33	5	6	9	3	4	6	5
hsa-miR-4710	0.696815	0.488348	0.992536	5	3	2	9	1	0	5	2
hsa-miR-6741-5p	0.696173	0.274913	0.992536	95	25	8	59	15	26	14	9
hsa-miR-362-3p	0.694072	0.288541	0.992536	23	20	105	29	11	10	36	20
hsa-miR-7850-5p	0.692714	0.396011	0.992536	59	33	7	13	23	5	2	7
hsa-miR-410-5p	0.689263	0.438154	0.992536	6	5	6	4	4	1	1	2
hsa-miR-5009-5p	0.688692	0.321581	0.992536	21	21	5	8	7	3	7	5
hsa-miR-3162-5p	0.681189	0.416702	0.992536	9	12	2	7	5	2	2	3
hsa-miR-3934-3p	0.680399	0.521579	0.992536	7	3	5	1	0	2	1	3
hsa-miR-3145-3p	0.678681	0.601437	0.992536	6	0	2	3	0	1	2	1
hsa-miR-579-5p	0.676632	0.389657	0.992536	15	8	7	5	3	3	8	0
hsa-miR-548z	0.675089	0.474448	0.992536	3	3	7	4	1	2	2	2
hsa-miR-320b	0.668497	0.147449	0.992536	6066	2466	1408	4643	1405	1765	1465	765
hsa-miR-29b-3p	0.665032	0.201608	0.992536	322	395	820	294	105	117	391	222
hsa-miR-4637	0.664674	0.464439	0.992536	10	5	2	7	4	0	2	3
hsa-miR-320c	0.662863	0.0955962	0.992536	1062	530	338	932	274	302	323	205
hsa-miR-320d	0.661316	0.0675425	0.992536	236	142	118	206	69	77	73	56
hsa-miR-6513-5p	0.661266	0.161938	0.992536	64	38	62	22	19	17	16	20
hsa-miR-503-5p	0.650038	0.0576644	0.943954	166	89	84	102	43	31	64	38
hsa-miR-4769-5p	0.639205	0.423262	0.992536	119	215	547	185	19	36	450	65
hsa-miR-106a-5p	0.637545	0.2266	0.992536	311	213	603	198	62	82	312	145
hsa-miR-3150a-5p	0.637081	0.378972	0.992536	35	14	6	12	13	2	6	3
hsa-miR-548ai	0.636627	0.470836	0.992536	10	3	7	4	4	0	2	3
hsa-miR-6876-5p	0.636557	0.574588	0.992536	9	3	1	1	1	2	1	1
hsa-miR-2355-5p	0.633236	0.187167	0.992536	46	25	45	16	11	14	16	12
hsa-miR-3942-5p	0.632145	0.454774	0.992536	9	9	11	2	1	1	8	4
hsa-miR-653-3p	0.630839	0.556063	0.992536	8	2	0	18	1	6	2	2
hsa-miR-130b-3p	0.629756	0.0389357	0.943954	205	129	170	156	53	61	92	68
hsa-miR-219b-5p	0.62949	0.593074	0.992536	4	1	1	8	1	1	4	0
hsa-miR-6786-5p	0.628202	0.580886	0.992536	7	1	4	2	1	1	0	3
hsa-miR-6816-5p	0.627802	0.518367	0.992536	10	5	4	4	0	0	7	3
hsa-miR-5581-3p	0.626722	0.636266	0.992536	1	1	7	1	2	1	0	1
hsa-miR-3913-5p	0.625978	0.117618	0.992536	117	71	45	83	30	28	49	23
hsa-miR-627-5p	0.625815	0.525525	0.992536	11	3	2	4	0	1	5	2
hsa-miR-142-5p	0.624576	0.0799082	0.992536	53224	32645	20690	31041	15407	11233	17992	10803
hsa-miR-6090	0.624192	0.573742	0.992536	2	1	6	5	1	0	2	3
hsa-miR-6737-5p	0.622783	0.674989	0.992536	3	0	8	0	2	1	0	1
hsa-miR-20b-5p	0.621585	0.272053	0.992536	546	513	1291	381	126	144	666	351
hsa-miR-6820-5p	0.621487	0.581418	0.992536	6	0	3	9	3	1	3	0
hsa-miR-1255a	0.618556	0.255219	0.992536	53	80	34	54	27	11	27	33
hsa-miR-4436a	0.616604	0.563205	0.992536	2	2	4	9	3	3	1	0
hsa-miR-4429	0.615477	0.217468	0.992536	77	30	17	60	17	22	18	14
hsa-miR-5697	0.615221	0.490106	0.992536	18	3	3	4	1	5	3	1
hsa-miR-98-5p	0.613251	0.118429	0.992536	195	99	117	58	46	42	47	49
hsa-miR-6729-5p	0.612638	0.342058	0.992536	59	10	26	103	8	29	24	19
hsa-miR-183-5p	0.609978	0.145636	0.992536	4366	3103	3553	2577	679	1004	3217	1306
hsa-miR-3187-3p	0.605957	0.314231	0.992536	21	9	10	11	6	6	5	3
hsa-miR-7111-3p	0.604523	0.665338	0.992536	6	2	0	3	1	0	0	3
hsa-miR-202-5p	0.602823	0.163984	0.992536	106	55	32	60	25	15	32	30
hsa-miR-4677-5p	0.598129	0.370498	0.992536	9	8	11	9	4	3	6	3
hsa-miR-6763-5p	0.59513	0.350363	0.992536	17	10	5	14	4	5	6	4
hsa-miR-3913-3p	0.594024	0.113873	0.992536	100	59	60	91	23	26	56	29
hsa-let-7c-3p	0.591657	0.645686	0.992536	5	1	2	2	0	2	2	0
hsa-miR-514a-3p	0.591119	0.312913	0.992536	196	59	27	62	40	45	25	12
hsa-let-7g-5p	0.589946	0.0414567	0.943954	288763	144009	184044	116394	59810	65707	107706	70745
hsa-miR-4750-3p	0.588889	0.319315	0.992536	63	47	42	214	31	40	40	48
hsa-miR-548av-3p	0.5869	0.639111	0.992536	14	1	0	3	0	2	1	3
hsa-miR-3184-3p	0.585823	0.272998	0.992536	33887	8798	4567	13250	7970	5581	5172	2653
hsa-miR-27a-3p	0.585671	0.187184	0.992536	26695	13441	8440	7798	7630	4645	5445	3971
hsa-miR-4437	0.58326	0.325347	0.992536	276	211	49	437	121	85	82	117
hsa-miR-5094	0.583123	0.471853	0.992536	9	6	5	5	4	3	1	2
hsa-miR-1180-3p	0.57974	0.129446	0.992536	215	177	291	194	67	75	169	89
hsa-miR-3613-5p	0.57863	0.195644	0.992536	1131	790	2127	733	374	377	685	673
hsa-miR-4659b-5p	0.577595	0.501061	0.992536	14	5	2	12	5	4	4	0
hsa-miR-2115-5p	0.577566	0.392726	0.992536	40	37	17	11	19	11	4	8
hsa-miR-18b-5p	0.577447	0.415609	0.992536	8	9	14	9	1	4	5	8
hsa-miR-1207-5p	0.577352	0.543001	0.992536	4	4	8	5	2	0	7	1
hsa-miR-4311	0.573545	0.541024	0.992536	6	4	2	17	3	4	6	0
hsa-miR-548am-5p	0.571163	0.547118	0.992536	4	5	5	3	1	1	5	1
hsa-miR-6726-5p	0.571118	0.646136	0.992536	6	1	1	4	0	0	3	2
hsa-miR-423-5p	0.56964	0.288337	0.992536	33797	8697	4482	13466	8040	5675	5169	2695
hsa-miR-3158-5p	0.567528	0.182526	0.992536	427	269	166	336	85	123	257	74
hsa-miR-548u	0.567466	0.289402	0.992536	72	32	14	16	11	12	16	14
hsa-miR-4717-5p	0.565744	0.673489	0.992536	5	0	4	1	0	1	2	1
hsa-miR-1296-3p	0.557827	0.708317	0.992536	5	1	2	1	0	0	4	0
hsa-miR-6783-3p	0.557693	0.685176	0.992536	0	1	5	3	1	1	0	2
hsa-miR-6514-5p	0.555877	0.385734	0.992536	33	25	7	29	11	15	11	3
hsa-miR-6752-5p	0.553903	0.579304	0.992536	4	5	6	1	2	1	1	3
hsa-miR-516b-5p	0.551701	0.312657	0.992536	25	12	12	16	7	4	7	9
hsa-miR-642b-3p	0.551449	0.637509	0.992536	8	3	5	0	1	0	5	1
hsa-miR-570-5p	0.550936	0.541516	0.992536	9	4	4	3	4	1	2	1
hsa-miR-140-5p	0.550307	0.0704034	0.992536	665	421	441	336	185	182	236	194
hsa-miR-376c-5p	0.545852	0.675982	0.992536	5	0	3	2	1	0	2	1
hsa-let-7e-5p	0.543295	0.153252	0.992536	308	164	156	143	103	73	87	54
hsa-let-7i-3p	0.54181	0.203822	0.992536	82	86	112	110	28	31	72	54
hsa-miR-1468-5p	0.540819	0.506052	0.992536	15	3	5	10	5	4	4	0
hsa-miR-718	0.538768	0.608271	0.992536	11	3	3	1	3	0	3	1
hsa-miR-7112-3p	0.53678	0.686611	0.992536	2	0	1	8	0	1	2	2
hsa-miR-6806-3p	0.536051	0.493563	0.992536	17	3	4	10	2	4	7	1
hsa-miR-4653-3p	0.535135	0.577673	0.992536	2	3	9	7	0	2	3	5
hsa-miR-3140-3p	0.534372	0.481659	0.992536	14	7	5	9	5	6	1	2
hsa-miR-301a-3p	0.534146	0.432409	0.992536	10	5	12	9	2	3	6	5
hsa-miR-3664-3p	0.527937	0.627999	0.992536	7	3	7	1	0	4	4	0
hsa-miR-4446-3p	0.527227	0.35331	0.992536	580	147	73	179	106	138	70	41
hsa-miR-6804-3p	0.525174	0.51299	0.992536	3	7	5	14	3	3	5	3
hsa-miR-4467	0.522334	0.480591	0.992536	13	6	7	23	6	9	5	1
hsa-miR-450b-5p	0.520336	0.297878	0.992536	677	357	323	162	248	102	121	135
hsa-miR-451b	0.519499	0.189688	0.992536	187	66	154	147	48	37	115	48
hsa-miR-299-5p	0.518356	0.633505	0.992536	4	1	7	2	2	2	2	0
hsa-miR-1288-5p	0.517358	0.568421	0.992536	24	2	5	3	0	3	6	4
hsa-miR-182-3p	0.515457	0.466814	0.992536	10	3	9	15	4	3	4	5
hsa-miR-4482-5p	0.514653	0.674101	0.992536	5	3	1	2	0	2	3	0
hsa-miR-320a	0.514458	0.298409	0.992536	93999	32922	17627	59782	19563	31312	19820	11024
hsa-miR-3158-3p	0.512002	0.248935	0.992536	399	278	147	368	80	133	265	87
hsa-miR-217	0.508753	0.525454	0.992536	11	9	5	6	0	3	9	3
hsa-miR-6869-5p	0.508085	0.6034	0.992536	12	3	3	3	1	4	0	3
hsa-miR-6078	0.508067	0.642161	0.992536	2	2	6	3	0	2	1	3
hsa-miR-1288-3p	0.507124	0.619574	0.992536	8	1	3	3	2	1	2	1
hsa-miR-1278	0.50417	0.26298	0.992536	122	42	34	40	26	29	24	16
hsa-miR-6755-5p	0.503797	0.626783	0.992536	9	2	4	6	4	4	0	0
hsa-miR-4284	0.503345	0.596016	0.992536	30	2	4	2	2	7	3	1
hsa-miR-139-3p	0.500331	0.240553	0.992536	478	208	112	202	109	124	104	72
hsa-miR-508-3p	0.498784	0.543983	0.992536	16	8	2	20	5	9	1	4
hsa-let-7f-5p	0.496101	0.153165	0.992536	356523	223031	255077	142124	110817	79784	149617	96840
hsa-miR-3202	0.494211	0.581666	0.992536	5	9	2	5	4	2	3	1
hsa-miR-642a-3p	0.493255	0.492764	0.992536	22	16	5	5	7	5	7	2
hsa-miR-193a-5p	0.489589	0.309292	0.992536	607	245	164	197	193	101	118	70
hsa-miR-5187-5p	0.489288	0.342929	0.992536	48	26	19	39	14	21	8	13
hsa-miR-548f-3p	0.488832	0.26001	0.992536	136	61	39	43	33	25	36	23
hsa-miR-4738-5p	0.488651	0.653536	0.992536	4	2	1	12	4	2	0	2
hsa-miR-4533	0.487067	0.440385	0.992536	17	8	6	16	4	6	8	3
hsa-miR-3186-3p	0.48698	0.641808	0.992536	8	3	2	5	5	1	0	1
hsa-miR-1976	0.485522	0.441322	0.992536	22	12	5	18	5	4	6	10
hsa-miR-494-5p	0.483136	0.678279	0.992536	6	0	1	10	1	4	1	1
hsa-miR-660-3p	0.481489	0.439999	0.992536	28	11	13	31	1	13	14	10
hsa-miR-6808-3p	0.480587	0.501051	0.992536	31	86	36	19	13	8	64	16
hsa-miR-219a-5p	0.479097	0.550607	0.992536	6	4	7	8	4	3	1	3
hsa-miR-96-5p	0.477447	0.395252	0.992536	318	259	286	200	31	78	358	97
hsa-miR-328-5p	0.47704	0.701996	0.992536	5	1	1	3	1	1	0	2
hsa-miR-424-5p	0.476698	0.327354	0.992536	205	147	85	58	75	45	54	42
hsa-miR-29c-3p	0.476257	0.386325	0.992536	316	310	990	352	125	131	474	281
hsa-miR-363-3p	0.465511	0.161025	0.992536	10026	5925	7271	6519	2076	2613	6526	3148
hsa-miR-4448	0.463442	0.360104	0.992536	84	33	18	70	22	26	18	21
hsa-miR-3064-5p	0.463191	0.387678	0.992536	60	30	16	32	24	11	12	11
hsa-miR-499b-3p	0.463042	0.355994	0.992536	99	39	25	35	13	33	28	11
hsa-miR-6736-5p	0.461349	0.483533	0.992536	25	4	8	9	5	4	7	3
hsa-miR-6783-5p	0.46089	0.732201	0.994918	1	2	6	1	0	0	1	4
hsa-miR-3182	0.457419	0.641898	0.992536	11	12	404	61	28	14	64	138
hsa-let-7i-5p	0.456404	0.118735	0.992536	721389	294449	340947	261206	138360	154906	267744	158040
hsa-miR-935	0.455982	0.362205	0.992536	26	16	17	32	9	9	17	8
hsa-miR-450a-5p	0.455739	0.331718	0.992536	325	136	75	85	84	41	71	62
hsa-miR-4659b-3p	0.454606	0.464255	0.992536	24	7	6	16	6	3	8	6
hsa-miR-454-3p	0.44913	0.50518	0.992536	108	135	642	94	90	56	178	174
hsa-miR-1914-5p	0.447242	0.638771	0.992536	4	2	6	5	0	3	2	3
hsa-miR-374a-5p	0.44628	0.206054	0.992536	1470	1282	1877	1081	541	563	979	718
hsa-miR-10a-3p	0.446059	0.520773	0.992536	40	20	172	50	9	27	74	37
hsa-miR-6734-3p	0.445534	0.686111	0.992536	3	0	5	5	1	1	2	2
hsa-miR-6807-5p	0.445294	0.643749	0.992536	4	4	1	10	2	4	2	1
hsa-miR-3191-3p	0.444811	0.609047	0.992536	37	7	1	5	8	3	3	4
hsa-miR-16-1-3p	0.444793	0.42811	0.992536	26	7	13	18	3	7	12	7
hsa-miR-1247-5p	0.444594	0.614893	0.992536	7	3	71	25	3	6	31	17
hsa-miR-15b-5p	0.442627	0.187943	0.992536	1832	1150	1057	958	645	537	666	424
hsa-miR-541-3p	0.441304	0.604647	0.992536	30	3	2	7	1	7	4	4
hsa-miR-301b-3p	0.440574	0.514888	0.992536	15	5	9	7	5	3	6	2
hsa-miR-29b-2-5p	0.440416	0.524027	0.992536	10	11	31	9	3	7	17	5
hsa-miR-6756-3p	0.440267	0.592584	0.992536	4	3	6	14	2	3	3	5
hsa-miR-6816-3p	0.439361	0.615667	0.992536	4	5	5	5	4	1	2	2
hsa-miR-6803-5p	0.439091	0.711939	0.992536	2	1	5	4	0	3	3	0
hsa-miR-578	0.437838	0.638781	0.992536	5	1	5	7	2	2	1	3
hsa-miR-379-3p	0.436916	0.48262	0.992536	73	11	10	13	13	8	13	7
hsa-miR-1225-5p	0.43587	0.722943	0.992536	9	4	0	2	4	0	1	1
hsa-miR-6070	0.435239	0.770825	0.996844	6	1	2	0	0	0	3	1
hsa-miR-4758-5p	0.434212	0.406435	0.992536	30	21	17	43	6	12	18	18
hsa-miR-190a-5p	0.433902	0.658678	0.992536	5	4	26	5	1	1	19	2
hsa-miR-4999-5p	0.433652	0.480301	0.992536	17	4	18	15	3	6	9	7
hsa-miR-2115-3p	0.431902	0.585529	0.992536	77	55	15	8	38	10	7	9
hsa-miR-502-5p	0.431395	0.68771	0.992536	0	3	21	8	1	1	10	6
hsa-miR-590-3p	0.430338	0.385491	0.992536	76	43	97	27	22	20	29	42
hsa-miR-19a-3p	0.429542	0.193875	0.992536	729	454	351	397	213	218	310	162
hsa-miR-1197	0.429068	0.401103	0.992536	90	28	41	17	8	24	31	15
hsa-miR-1275	0.426733	0.485542	0.992536	42	13	43	52	5	7	33	29
hsa-miR-509-3-5p	0.42587	0.512183	0.992536	62	27	6	19	18	13	9	7
hsa-miR-4785	0.42401	0.34127	0.992536	56	31	56	84	26	29	25	26
hsa-miR-4734	0.42045	0.667383	0.992536	8	0	6	7	1	3	1	4
hsa-miR-4436b-5p	0.418807	0.633428	0.992536	3	2	8	23	6	3	7	2
hsa-miR-4435	0.417381	0.604515	0.992536	27	4	2	5	4	3	5	3
hsa-miR-196b-3p	0.416804	0.470954	0.992536	48	9	19	16	4	12	20	5
hsa-miR-1292-5p	0.415567	0.460922	0.992536	50	24	11	39	20	12	9	13
hsa-miR-548am-3p	0.414794	0.499033	0.992536	66	24	10	18	14	18	6	10
hsa-miR-1246	0.41459	0.467356	0.992536	5058	3595	2688	1376	2719	1003	1237	653
hsa-miR-3186-5p	0.410666	0.662762	0.992536	11	7	3	4	1	0	10	2
hsa-miR-6859-5p	0.410322	0.436912	0.992536	36	31	14	21	11	8	23	9
hsa-miR-6839-5p	0.406378	0.656543	0.992536	16	6	1	2	2	2	5	2
hsa-miR-4668-5p	0.404706	0.542676	0.992536	18	14	3	19	7	4	8	7
hsa-miR-4743-5p	0.404032	0.712276	0.992536	5	7	0	2	2	1	2	2
hsa-miR-3688-5p	0.403287	0.427539	0.992536	64	56	78	92	20	20	91	27
hsa-miR-9-3p	0.402574	0.352327	0.992536	43	30	26	32	14	14	25	11
hsa-miR-127-3p	0.39973	0.505443	0.992536	6875	711	578	1181	548	1255	1212	529
hsa-miR-3194-3p	0.399701	0.587912	0.992536	6	6	11	5	3	3	5	3
hsa-miR-92b-3p	0.397364	0.331683	0.992536	292	109	330	176	63	75	185	121
hsa-miR-1249-3p	0.397211	0.499963	0.992536	17	10	14	27	7	4	9	13
hsa-miR-3149	0.396873	0.531795	0.992536	16	16	8	9	8	5	8	3
hsa-miR-1294	0.39592	0.383369	0.992536	153	53	35	55	38	30	42	19
hsa-miR-1253	0.389946	0.787404	0.99817	0	1	2	6	0	0	2	3
hsa-miR-2355-3p	0.388063	0.24911	0.992536	311	139	127	169	64	101	84	92
hsa-miR-4258	0.383052	0.637963	0.992536	7	3	9	7	0	3	5	5
hsa-miR-4747-3p	0.381614	0.696263	0.992536	3	5	2	4	2	2	1	2
hsa-miR-6728-5p	0.379038	0.675809	0.992536	3	3	3	9	2	2	2	3
hsa-miR-6503-3p	0.376095	0.454154	0.992536	40	17	32	40	10	16	32	7
hsa-miR-598-5p	0.372333	0.691131	0.992536	6	3	2	6	1	2	1	4
hsa-miR-32-3p	0.37138	0.448538	0.992536	41	21	47	17	13	18	20	10
hsa-miR-8071	0.369769	0.738631	0.995351	6	1	5	1	0	2	2	2
hsa-miR-582-5p	0.369708	0.525762	0.992536	142	114	65	27	66	24	35	38
hsa-miR-363-5p	0.369108	0.639714	0.992536	10	3	4	10	2	1	5	5
hsa-miR-493-5p	0.368478	0.527567	0.992536	3266	688	338	677	426	848	477	229
hsa-miR-597-3p	0.368413	0.571078	0.992536	15	11	8	13	2	11	5	5
hsa-miR-3679-5p	0.368268	0.511836	0.992536	94	53	30	44	38	34	14	12
hsa-miR-1290	0.368118	0.375446	0.992536	356	165	327	183	164	117	122	73
hsa-miR-502-3p	0.365516	0.192114	0.992536	797	475	656	613	249	268	476	284
hsa-miR-4715-5p	0.365463	0.663864	0.992536	5	3	5	7	1	2	3	4
hsa-miR-6791-5p	0.365011	0.658356	0.992536	8	5	2	14	2	6	2	4
hsa-miR-618	0.364011	0.663386	0.992536	50	24	3	9	11	19	3	3
hsa-miR-3907	0.363666	0.762248	0.995585	4	4	6	0	1	0	1	5
hsa-miR-4762-3p	0.363294	0.596673	0.992536	16	7	6	6	6	3	4	3
hsa-miR-877-5p	0.362234	0.331387	0.992536	190	108	108	106	67	58	47	67
hsa-miR-6501-3p	0.362146	0.685436	0.992536	6	2	4	8	0	3	4	3
hsa-miR-1298-5p	0.360413	0.64086	0.992536	9	5	5	8	1	4	2	6
hsa-miR-1285-3p	0.359664	0.315236	0.992536	229	134	101	175	59	64	135	65
hsa-miR-516a-5p	0.357904	0.733205	0.994918	1	3	7	3	1	1	5	1
hsa-miR-4754	0.356629	0.649154	0.992536	7	2	8	9	3	2	6	2
hsa-miR-744-5p	0.356232	0.450743	0.992536	13308	3386	2241	4577	2519	3435	1945	1872
hsa-miR-664a-5p	0.356162	0.497811	0.992536	1013	406	156	310	270	245	200	103
hsa-miR-3154	0.355893	0.739811	0.995351	9	4	0	3	3	1	1	2
hsa-miR-497-5p	0.353578	0.402387	0.992536	66	48	61	74	18	21	58	35
hsa-miR-101-3p	0.352291	0.355349	0.992536	29962	15661	25366	12460	5819	8757	20046	8507
hsa-miR-5191	0.351023	0.53674	0.992536	20	17	10	14	8	6	6	10
hsa-miR-4787-3p	0.349918	0.664705	0.992536	6	3	7	13	3	5	1	5
hsa-miR-647	0.349528	0.49014	0.992536	43	22	16	40	9	11	15	24
hsa-miR-107	0.346234	0.326182	0.992536	1469	1146	1883	1243	491	593	1056	875
hsa-miR-4745-3p	0.34422	0.773063	0.996844	1	1	1	8	1	1	3	1
hsa-miR-424-3p	0.344012	0.439759	0.992536	129	67	39	72	46	37	30	29
hsa-miR-1295b-3p	0.343222	0.753456	0.995351	15	1	3	4	1	7	0	1
hsa-miR-340-5p	0.341467	0.259024	0.992536	14172	5836	8289	5029	2703	3716	5430	4214
hsa-miR-6866-5p	0.34109	0.547163	0.992536	103	33	12	34	20	26	13	19
hsa-miR-584-3p	0.340009	0.49732	0.992536	26	16	31	14	10	9	16	9
hsa-miR-5684	0.339838	0.546007	0.992536	60	29	21	26	18	27	11	6
hsa-miR-3143	0.338519	0.498905	0.992536	32	13	38	22	15	13	15	8
hsa-miR-130a-3p	0.338424	0.330613	0.992536	421	262	521	287	140	183	279	167
hsa-miR-335-5p	0.337541	0.325772	0.992536	638	358	368	262	133	252	230	182
hsa-miR-638	0.3375	0.653898	0.992536	6	7	5	10	4	2	7	2
hsa-miR-4707-3p	0.337012	0.617905	0.992536	23	7	9	5	2	7	4	7
hsa-miR-1908-5p	0.336923	0.569291	0.992536	49	7	10	24	5	12	17	7
hsa-miR-3688-3p	0.336666	0.473709	0.992536	61	58	71	91	23	19	73	41
hsa-miR-769-3p	0.3361	0.608937	0.992536	13	5	12	13	5	2	5	9
hsa-miR-5193	0.334456	0.573111	0.992536	34	5	15	14	8	5	6	11
hsa-miR-30e-5p	0.33294	0.214574	0.992536	21703	12247	16149	11895	5802	6767	10890	7890
hsa-miR-6892-3p	0.332432	0.784512	0.99817	6	3	1	3	1	0	0	5
hsa-miR-3667-5p	0.327026	0.720601	0.992536	5	1	4	8	1	3	3	2
hsa-miR-766-5p	0.325354	0.50928	0.992536	196	61	29	90	40	56	41	31
hsa-miR-654-5p	0.324952	0.591208	0.992536	1649	266	152	294	182	393	281	101
hsa-miR-4650-5p	0.324047	0.752852	0.995351	3	4	7	2	3	1	0	4
hsa-miR-6746-5p	0.323907	0.774522	0.996844	5	0	4	8	2	0	1	5
hsa-miR-3160-5p	0.323789	0.594192	0.992536	14	13	17	39	14	7	16	7
hsa-miR-628-3p	0.321127	0.576188	0.992536	257	99	46	55	80	53	40	24
hsa-let-7d-5p	0.320805	0.541513	0.992536	25507	13298	4950	11771	10431	5704	4784	4240
hsa-miR-3912-3p	0.320645	0.531393	0.992536	24	12	19	25	8	7	10	15
hsa-miR-6821-3p	0.318408	0.801687	0.99817	5	1	1	3	0	0	3	2
hsa-miR-432-5p	0.316128	0.581923	0.992536	3604	886	437	607	460	1005	562	295
hsa-miR-4714-5p	0.312189	0.795011	0.99817	2	0	3	5	1	1	1	2
hsa-miR-483-5p	0.310961	0.645964	0.992536	546	116	53	157	66	205	63	27
hsa-miR-185-5p	0.310023	0.346726	0.992536	61008	25276	18481	24050	11532	15418	21906	13695
hsa-miR-136-5p	0.309319	0.607067	0.992536	232	67	33	55	27	43	104	13
hsa-miR-550b-3p	0.308414	0.43722	0.992536	146	72	42	78	32	47	55	33
hsa-miR-6855-5p	0.30603	0.70103	0.992536	14	6	3	18	8	6	1	4
hsa-miR-493-3p	0.304458	0.593889	0.992536	2757	826	281	618	385	790	574	231
hsa-miR-144-3p	0.304207	0.606654	0.992536	2362	2345	2313	1968	489	403	3834	854
hsa-miR-760	0.304067	0.614489	0.992536	419	141	49	200	78	176	54	50
hsa-miR-380-3p	0.303188	0.719213	0.992536	13	3	2	6	3	4	3	1
hsa-miR-381-3p	0.301718	0.574211	0.992536	8914	2006	1109	1575	928	1964	2343	798
hsa-miR-25-5p	0.300547	0.415814	0.992536	144	50	54	103	41	37	51	41
hsa-miR-4738-3p	0.300423	0.625167	0.992536	26	7	6	19	7	8	5	7
hsa-miR-3134	0.300419	0.813149	0.99817	5	1	2	1	1	1	0	2
hsa-miR-1179	0.300364	0.803054	0.99817	6	1	2	4	0	0	6	1
hsa-miR-4749-5p	0.298289	0.802581	0.99817	5	3	2	0	1	1	2	1
hsa-miR-20a-5p	0.296642	0.560082	0.992536	6200	3392	10807	3018	1367	2026	5727	3811
hsa-miR-601	0.293668	0.63234	0.992536	175	52	140	55	22	20	38	123
hsa-miR-125a-3p	0.292538	0.59926	0.992536	153	42	18	78	34	45	22	28
hsa-miR-34c-5p	0.292087	0.571751	0.992536	124	32	69	18	27	15	43	30
hsa-miR-4695-3p	0.290185	0.701264	0.992536	8	2	20	10	2	5	6	8
hsa-miR-3620-5p	0.289935	0.655845	0.992536	17	6	16	45	5	14	16	10
hsa-miR-17-5p	0.289285	0.537876	0.992536	3819	2641	7396	2346	1242	1572	3267	2820
hsa-miR-6884-5p	0.287268	0.662915	0.992536	17	8	9	4	4	5	7	3
hsa-miR-499a-5p	0.28411	0.542612	0.992536	89	36	25	43	14	36	21	22
hsa-miR-548t-3p	0.279306	0.576233	0.992536	27	14	24	18	10	7	20	7
hsa-miR-4440	0.277082	0.769754	0.996844	2	12	1	6	2	4	4	3
hsa-miR-380-5p	0.273283	0.711077	0.992536	49	4	9	9	1	7	14	10
hsa-miR-4793-5p	0.272612	0.754429	0.995351	9	1	6	5	3	1	2	4
hsa-miR-3934-5p	0.271886	0.637747	0.992536	56	21	46	28	8	5	46	24
hsa-miR-3194-5p	0.267434	0.742603	0.995351	3	5	7	6	2	2	5	3
hsa-miR-141-5p	0.26592	0.761873	0.995585	10	4	25	8	1	2	23	3
hsa-miR-4758-3p	0.265837	0.805022	0.99817	5	1	5	1	1	1	2	2
hsa-miR-629-3p	0.265464	0.46082	0.992536	267	145	123	119	95	61	109	68
hsa-miR-1304-5p	0.2651	0.625576	0.992536	246	120	49	123	106	63	46	37
hsa-miR-296-3p	0.264207	0.686374	0.992536	74	51	10	61	27	23	51	6
hsa-miR-5680	0.263577	0.816783	0.99817	2	2	1	7	1	0	4	2
hsa-miR-24-2-5p	0.263283	0.50182	0.992536	655	437	316	350	300	171	258	172
hsa-miR-4516	0.262424	0.562033	0.992536	98	117	136	198	53	104	86	65
hsa-miR-6813-5p	0.262121	0.721811	0.992536	19	17	6	10	0	8	10	11
hsa-miR-6864-3p	0.258854	0.852217	0.99817	32	1	1	0	0	10	1	1
hsa-miR-491-5p	0.254008	0.653158	0.992536	43	35	103	29	22	19	25	48
hsa-miR-580-3p	0.253776	0.755927	0.995351	6	6	7	6	0	3	4	7
hsa-miR-3940-3p	0.252863	0.718537	0.992536	12	4	6	7	2	3	6	4
hsa-miR-3917	0.251236	0.820566	0.99817	1	1	8	5	1	0	5	3
hsa-miR-6873-5p	0.249663	0.84185	0.99817	11	1	3	0	3	1	0	2
hsa-miR-324-5p	0.249593	0.52146	0.992536	259	198	377	178	115	115	158	164
hsa-miR-937-3p	0.248254	0.775703	0.996844	5	6	8	6	1	0	8	6
hsa-miR-323b-3p	0.247814	0.679921	0.992536	104	18	13	33	10	34	17	14
hsa-miR-652-3p	0.246344	0.42344	0.992536	11842	7480	8682	8271	4626	5221	4489	4566
hsa-miR-6893-3p	0.245626	0.873081	0.99817	0	0	2	5	0	2	1	1
hsa-miR-660-5p	0.24267	0.608605	0.992536	743	501	1496	689	254	302	886	557
hsa-miR-6850-5p	0.240722	0.735395	0.995107	10	3	10	10	1	4	8	5
hsa-miR-148a-3p	0.239585	0.696991	0.992536	1586092	516612	169029	254926	317520	436750	278376	104788
hsa-miR-3174	0.238122	0.75584	0.995351	40	6	9	10	15	7	2	3
hsa-miR-148b-5p	0.237635	0.532561	0.992536	244	155	280	127	80	80	151	132
hsa-miR-33b-5p	0.235893	0.691596	0.992536	20	15	24	21	16	4	7	15
hsa-miR-1250-5p	0.23575	0.519852	0.992536	280	97	103	112	86	67	74	60
hsa-miR-1307-5p	0.235271	0.458068	0.992536	787	346	504	551	257	280	243	333
hsa-miR-4746-5p	0.23479	0.681924	0.992536	25	11	6	20	7	6	9	10
hsa-miR-374c-5p	0.233425	0.628413	0.992536	33	15	18	16	13	8	12	9
hsa-miR-140-3p	0.231921	0.458457	0.992536	145772	99497	77248	86024	51926	51087	74292	44278
hsa-miR-181b-3p	0.230431	0.664879	0.992536	47	23	27	13	6	8	27	19
hsa-miR-214-5p	0.227461	0.606686	0.992536	176	59	44	70	34	63	39	33
hsa-miR-26a-1-3p	0.225075	0.757535	0.995461	19	7	8	2	5	2	6	5
hsa-miR-4426	0.223349	0.892463	0.99817	2	0	1	5	0	4	0	0
hsa-miR-3190-5p	0.222844	0.827271	0.99817	28	0	3	3	6	3	2	2
hsa-miR-1-3p	0.222534	0.662323	0.992536	10455	1326	2399	1487	904	1770	3087	1482
hsa-miR-93-5p	0.22248	0.540677	0.992536	7787	6044	10951	5376	3375	3454	5680	4529
hsa-miR-615-5p	0.222118	0.807903	0.99817	7	2	7	3	2	4	4	0
hsa-miR-628-5p	0.221516	0.578048	0.992536	124	54	43	40	32	28	37	35
hsa-let-7c-5p	0.219957	0.712307	0.992536	14611	3686	1954	3118	2034	5190	2264	1026
hsa-miR-6722-3p	0.219269	0.845834	0.99817	2	2	12	0	2	1	2	4
hsa-miR-6515-5p	0.214489	0.672656	0.992536	107	49	21	59	29	44	24	21
hsa-miR-4511	0.212923	0.6757	0.992536	34	24	29	57	12	18	18	32
hsa-miR-22-5p	0.212905	0.560598	0.992536	660	227	222	357	187	220	198	126
hsa-miR-4677-3p	0.211346	0.661859	0.992536	67	17	14	27	14	14	17	16
hsa-miR-4676-3p	0.211293	0.760673	0.995585	21	4	4	12	7	4	6	3
hsa-miR-3940-5p	0.211046	0.801049	0.99817	5	5	6	3	1	3	5	2
hsa-miR-4756-3p	0.210771	0.839343	0.99817	8	0	6	7	1	0	4	6
hsa-miR-548f-5p	0.210005	0.564667	0.992536	142	89	73	91	41	41	97	44
hsa-miR-627-3p	0.209845	0.753537	0.995351	21	6	14	9	10	7	7	1
hsa-miR-1229-3p	0.207684	0.835441	0.99817	1	3	10	5	0	4	6	2
hsa-miR-3138	0.20742	0.719687	0.992536	59	28	12	42	20	29	13	9
hsa-miR-3944-3p	0.206013	0.848461	0.99817	2	1	14	2	0	4	3	4
hsa-miR-5703	0.205994	0.89324	0.99817	0	0	2	5	1	2	1	0
hsa-miR-550a-5p	0.205489	0.637011	0.992536	123	69	30	82	41	35	50	36
hsa-miR-190a-3p	0.203962	0.913208	0.99817	0	0	5	2	0	0	0	4
hsa-miR-3065-3p	0.202225	0.690605	0.992536	348	203	101	97	135	103	70	67
hsa-miR-3160-3p	0.200958	0.725755	0.994072	16	14	19	45	14	9	17	14
hsa-miR-6789-3p	0.199695	0.756562	0.995351	10	6	15	8	5	5	9	3
hsa-miR-2110	0.199537	0.656961	0.992536	580	211	116	302	191	133	187	95
hsa-miR-3127-5p	0.199399	0.691427	0.992536	41	13	13	22	13	9	17	7
hsa-miR-8053	0.199163	0.898513	0.99817	1	0	1	5	0	0	1	3
hsa-miR-921	0.197386	0.803299	0.99817	7	2	7	6	3	2	5	2
hsa-miR-1306-3p	0.194694	0.680987	0.992536	120	35	24	74	31	39	32	24
hsa-miR-548x-5p	0.193799	0.807565	0.99817	10	9	3	5	2	2	3	8
hsa-miR-126-5p	0.193434	0.55712	0.992536	6045	2915	5503	3157	2100	2252	2246	2774
hsa-miR-1185-1-3p	0.191512	0.712495	0.992536	82	24	19	26	7	23	35	14
hsa-miR-548j-3p	0.191059	0.724495	0.993281	83	44	22	27	14	12	57	18
hsa-miR-3135a	0.188229	0.759255	0.995585	14	7	11	18	2	9	8	9
hsa-miR-146a-3p	0.188209	0.679598	0.992536	171	43	43	123	36	64	58	36
hsa-miR-5189-5p	0.187074	0.73426	0.995107	44	12	8	21	5	12	16	11
hsa-miR-374b-3p	0.185943	0.727507	0.994763	31	13	20	22	18	10	12	5
hsa-miR-185-3p	0.185358	0.636236	0.992536	2719	757	678	1222	617	848	663	511
hsa-miR-4459	0.184984	0.730358	0.994763	66	27	17	88	29	27	30	20
hsa-miR-374a-3p	0.178839	0.704941	0.992536	538	393	1017	396	193	203	559	455
hsa-miR-3199	0.176881	0.827965	0.99817	7	6	5	3	2	1	4	5
hsa-miR-486-5p	0.17629	0.639641	0.992536	120566	77733	94485	166513	44218	59382	116464	53519
hsa-miR-4447	0.176191	0.893831	0.99817	2	1	8	0	0	1	5	1
hsa-miR-4280	0.174329	0.882316	0.99817	1	1	3	5	2	1	3	0
hsa-miR-6778-5p	0.172658	0.851619	0.99817	9	2	4	2	1	1	4	3
hsa-miR-486-3p	0.171561	0.64811	0.992536	121242	77794	94809	165993	44122	59902	117175	53563
hsa-miR-4672	0.169647	0.884049	0.99817	5	0	6	6	1	0	1	7
hsa-miR-498	0.168336	0.888972	0.99817	1	1	2	7	3	2	0	1
hsa-miR-150-5p	0.165403	0.704738	0.992536	4513	3360	8918	3258	2009	2387	4661	3002
hsa-miR-548q	0.165242	0.793347	0.99817	9	7	21	11	4	9	8	7
hsa-miR-331-5p	0.163079	0.663699	0.992536	136	64	51	76	34	54	60	31
hsa-miR-3663-5p	0.162776	0.806002	0.99817	18	3	9	15	3	3	12	7
hsa-miR-941	0.160093	0.71578	0.992536	2113	964	473	884	773	428	623	470
hsa-miR-6832-5p	0.15883	0.884856	0.99817	5	2	2	2	1	0	2	3
hsa-miR-411-3p	0.158065	0.795767	0.99817	41	9	9	11	6	14	11	4
hsa-miR-5588-5p	0.15639	0.767952	0.996844	64	23	126	106	29	35	60	62
hsa-let-7f-1-3p	0.154786	0.707281	0.992536	150	66	90	65	68	43	39	43
hsa-miR-142-3p	0.153289	0.706991	0.992536	1867	1617	2400	2029	977	574	2013	1302
hsa-miR-425-3p	0.152961	0.68756	0.992536	6064	3012	2677	3468	2496	2205	1528	1747
hsa-miR-324-3p	0.152278	0.657455	0.992536	447	331	599	393	192	243	344	268
hsa-miR-1269a	0.149925	0.895746	0.99817	7	1	1	64	2	26	14	2
hsa-miR-126-3p	0.147928	0.636237	0.992536	218194	120532	104004	131919	87538	70333	85191	72064
hsa-miR-939-5p	0.14725	0.79142	0.99817	24	6	17	14	8	4	10	11
hsa-miR-6805-5p	0.144557	0.829132	0.99817	13	6	8	9	6	1	6	7
hsa-miR-197-5p	0.14412	0.830842	0.99817	32	8	4	17	8	9	13	2
hsa-miR-4730	0.142298	0.880701	0.99817	9	10	3	2	6	4	0	3
hsa-miR-548o-3p	0.14195	0.778337	0.997368	723	318	98	224	202	182	214	113
hsa-miR-338-5p	0.141879	0.755423	0.995351	316	173	111	133	137	107	84	59
hsa-miR-24-1-5p	0.140269	0.824056	0.99817	36	5	7	11	6	10	8	5
hsa-miR-16-2-3p	0.140031	0.670021	0.992536	2659	1313	1844	2871	992	1253	1836	960
hsa-miR-642b-5p	0.139677	0.868666	0.99817	20	7	0	9	6	5	3	4
hsa-miR-6505-5p	0.13873	0.865486	0.99817	12	7	7	2	1	3	11	2
hsa-miR-206	0.138594	0.722217	0.992536	104	42	50	68	19	39	39	49
hsa-miR-186-5p	0.138591	0.620907	0.992536	16690	10243	13290	11357	5601	5807	11308	7735
hsa-miR-548ab	0.136875	0.872898	0.99817	8	6	9	1	5	1	6	2
hsa-miR-496	0.136677	0.870353	0.99817	11	4	16	6	1	13	6	1
hsa-miR-500a-3p	0.134891	0.611241	0.992536	1485	793	993	1084	511	570	929	516
hsa-miR-5091	0.134643	0.893729	0.99817	8	0	13	5	2	0	7	6
hsa-miR-3667-3p	0.133387	0.875861	0.99817	7	2	4	5	3	2	4	1
hsa-miR-4740-3p	0.132865	0.9053	0.99817	1	1	3	5	2	1	2	1
hsa-miR-4732-3p	0.132743	0.818218	0.99817	16	8	15	13	6	10	11	3
hsa-miR-6773-3p	0.131745	0.869319	0.99817	8	6	6	8	3	1	2	10
hsa-miR-1587	0.131221	0.927398	0.99817	2	1	0	5	0	2	3	0
hsa-miR-370-3p	0.129289	0.769191	0.996844	4114	1870	768	1905	944	1479	1517	791
hsa-miR-181c-5p	0.128734	0.789443	0.99817	63	44	112	32	25	32	56	39
hsa-miR-299-3p	0.127057	0.899108	0.99817	16	3	1	1	1	3	2	4
hsa-miR-3679-3p	0.125424	0.85598	0.99817	15	5	9	16	7	1	6	11
hsa-miR-4497	0.124467	0.806558	0.99817	19	16	18	24	8	7	18	14
hsa-miR-1273h-5p	0.123198	0.830337	0.99817	419	124	45	158	121	124	78	43
hsa-miR-629-5p	0.120109	0.748704	0.995351	6711	3735	2695	2921	2741	1613	2918	1726
hsa-miR-6891-5p	0.118969	0.925423	0.99817	5	2	0	2	0	2	2	1
hsa-miR-4635	0.114942	0.896061	0.99817	9	2	8	1	2	3	4	2
hsa-miR-651-5p	0.111754	0.742305	0.995351	305	163	282	166	103	108	228	110
hsa-miR-3187-5p	0.111568	0.914518	0.99817	1	1	4	7	1	2	2	3
hsa-miR-4772-3p	0.111512	0.883272	0.99817	32	15	1	10	12	6	6	6
hsa-miR-146b-5p	0.106806	0.707327	0.992536	1305	557	607	615	320	487	572	362
hsa-miR-6894-5p	0.106318	0.902522	0.99817	6	4	2	5	3	1	4	2
hsa-miR-296-5p	0.103629	0.854536	0.99817	36	13	13	38	15	21	12	7
hsa-miR-19b-3p	0.103479	0.782575	0.99817	1525	1133	1957	1077	573	605	1408	981
hsa-miR-431-5p	0.101412	0.853381	0.99817	335	102	73	39	65	102	61	46
hsa-miR-766-3p	0.100809	0.820926	0.99817	355	240	614	264	189	145	231	317
hsa-miR-3920	0.100499	0.838226	0.99817	37	21	14	19	9	19	14	10
hsa-miR-4458	0.0990875	0.915772	0.99817	6	2	2	4	1	2	3	2
hsa-miR-3150b-3p	0.0982432	0.90663	0.99817	31	16	3	6	16	5	7	1
hsa-miR-3648	0.098146	0.866284	0.99817	24	11	22	17	9	5	7	21
hsa-miR-202-3p	0.0977274	0.928677	0.99817	8	1	1	3	0	2	3	2
hsa-miR-7151-3p	0.094332	0.900675	0.99817	14	3	4	5	2	5	4	3
hsa-miR-1306-5p	0.091961	0.891578	0.99817	14	4	17	9	5	3	5	12
hsa-miR-6720-3p	0.0908339	0.922945	0.99817	10	2	2	4	0	2	4	4
hsa-miR-6887-5p	0.0904422	0.935263	0.99817	5	0	3	6	3	0	4	1
hsa-miR-3120-3p	0.0878687	0.839778	0.99817	148	59	39	78	39	63	41	34
hsa-miR-1908-3p	0.0870865	0.875721	0.99817	19	10	16	18	4	6	12	16
hsa-miR-1273f	0.0870618	0.829244	0.99817	92	48	71	118	52	43	48	49
hsa-miR-4296	0.0865153	0.934004	0.99817	6	2	5	1	1	4	3	0
hsa-miR-5096	0.0863608	0.81672	0.99817	139	88	127	189	65	77	92	94
hsa-miR-3198	0.0838321	0.909356	0.99817	36	17	5	10	15	13	4	3
hsa-miR-181b-5p	0.0836879	0.766179	0.996844	2729	1415	1329	1769	1014	864	1421	944
hsa-miR-1273h-3p	0.0834098	0.853692	0.99817	750	200	156	281	228	194	146	134
hsa-miR-92a-1-5p	0.0827824	0.901887	0.99817	14	4	16	10	1	9	8	8
hsa-miR-146a-5p	0.0796885	0.790609	0.99817	7201	3011	4930	3876	1887	3320	2847	2829
hsa-miR-3128	0.0774164	0.904125	0.99817	22	6	10	15	4	9	3	13
hsa-miR-450a-1-3p	0.0755096	0.922182	0.99817	10	6	5	7	5	1	2	8
hsa-miR-379-5p	0.0738673	0.860873	0.99817	3191	934	848	728	431	827	1326	591
hsa-miR-6724-5p	0.0735635	0.916862	0.99817	11	4	30	7	7	4	12	9
hsa-miR-103b	0.0724375	0.791108	0.99817	21856	12855	15621	12298	7426	8094	11393	10616
hsa-miR-6511a-3p	0.071905	0.929155	0.99817	5	10	17	7	1	2	11	13
hsa-miR-30c-1-3p	0.0689785	0.864273	0.99817	121	37	37	42	26	39	34	30
hsa-miR-7110-3p	0.0674541	0.915063	0.99817	37	35	44	174	42	29	41	70
hsa-miR-550a-3-5p	0.0662268	0.862102	0.99817	81	39	36	45	33	23	34	26
hsa-miR-29a-3p	0.0642091	0.844284	0.99817	9354	6175	7633	4370	3427	3183	6218	4227
hsa-miR-5001-5p	0.0635806	0.937325	0.99817	8	4	4	6	2	1	3	7
hsa-miR-4421	0.0617733	0.945315	0.99817	5	3	5	2	2	3	3	1
hsa-miR-6883-5p	0.0605663	0.921924	0.99817	13	10	12	18	12	3	13	5
hsa-miR-605-3p	0.0586618	0.943629	0.99817	25	7	4	3	9	5	1	4
hsa-miR-17-3p	0.0581066	0.923981	0.99817	29	28	53	23	8	7	40	35
hsa-miR-4665-5p	0.0579386	0.93395	0.99817	83	17	5	24	14	30	8	11
hsa-miR-5585-3p	0.0578549	0.943946	0.99817	20	1	4	12	2	2	6	10
hsa-miR-27b-3p	0.0577076	0.886058	0.99817	34254	9420	10792	11434	5374	13506	10638	6484
hsa-miR-3665	0.0573997	0.932016	0.99817	12	4	32	12	6	13	12	6
hsa-miR-25-3p	0.0571904	0.879235	0.99817	31035	13742	9304	15140	10825	9513	13151	6175
hsa-miR-4494	0.0546706	0.9763	0.99817	4	3	0	0	0	0	5	0
hsa-miR-548ap-3p	0.0534241	0.915168	0.99817	19	15	24	23	8	10	15	18
hsa-miR-548e-3p	0.0510093	0.867089	0.99817	442	270	250	270	164	189	190	193
hsa-miR-106b-3p	0.0481266	0.87442	0.99817	22764	10550	9094	12924	7430	7987	11361	5997
hsa-miR-6516-5p	0.0480548	0.912117	0.99817	72	25	31	41	25	25	16	28
hsa-miR-532-5p	0.0470483	0.871487	0.99817	7766	4143	3771	4936	2533	2701	4960	2502
hsa-miR-4763-5p	0.0452811	0.945254	0.99817	28	13	7	12	12	1	13	9
hsa-miR-548az-5p	0.0451576	0.948855	0.99817	33	12	6	6	8	14	4	4
hsa-miR-6721-5p	0.0429366	0.939959	0.99817	17	13	8	18	9	4	12	10
hsa-miR-92a-3p	0.0414751	0.899275	0.99817	66642	33206	77985	51547	24574	33460	49725	35441
hsa-miR-542-5p	0.0400933	0.963807	0.99817	6	5	4	3	4	0	3	4
hsa-miR-376c-3p	0.0397748	0.933387	0.99817	131	53	125	34	23	53	79	55
hsa-miR-654-3p	0.0384378	0.937555	0.99817	3088	790	581	893	494	1203	733	409
hsa-miR-103a-3p	0.0375957	0.891485	0.99817	21916	13260	16682	12872	8110	8412	12238	11149
hsa-miR-338-3p	0.0367949	0.95397	0.99817	13	5	11	7	2	5	8	7
hsa-miR-184	0.0351694	0.951568	0.99817	12	16	14	13	6	10	16	5
hsa-miR-6745	0.0351611	0.97658	0.99817	3	1	1	5	1	0	1	4
hsa-miR-501-3p	0.0327954	0.898407	0.99817	780	375	450	507	259	328	408	283
hsa-miR-137	0.0320479	0.966873	0.99817	12	2	3	8	3	4	3	4
hsa-miR-6827-5p	0.0319334	0.973508	0.99817	9	2	4	3	0	5	1	4
hsa-miR-377-3p	0.030779	0.965645	0.99817	20	5	10	3	2	8	9	3
hsa-miR-3130-3p	0.0285088	0.977762	0.99817	7	1	2	5	1	3	5	0
hsa-miR-3156-5p	0.0271572	0.974508	0.99817	10	8	3	14	0	4	17	4
hsa-miR-181d-5p	0.0216309	0.94081	0.99817	630	352	380	347	252	266	297	221
hsa-miR-92b-5p	0.0212383	0.961848	0.99817	47	14	27	39	15	14	33	16
hsa-miR-1185-5p	0.0199549	0.985292	0.99817	7	0	4	2	1	3	1	2
hsa-miR-191-3p	0.0196456	0.969156	0.99817	54	19	20	40	17	32	18	10
hsa-miR-204-3p	0.0162863	0.984011	0.99817	19	11	1	4	4	8	3	5
hsa-miR-323a-5p	0.0143291	0.99009	0.99817	10	4	0	2	1	0	7	2
hsa-miR-10b-3p	0.0141023	0.980239	0.99817	21	10	14	29	4	10	24	11
hsa-miR-20b-3p	0.0136746	0.98378	0.99817	14	3	13	6	4	5	10	3
hsa-miR-942-3p	0.0127601	0.986203	0.99817	7	4	8	11	3	1	10	6
hsa-miR-15b-3p	0.0120183	0.976239	0.99817	1108	727	1810	943	477	585	1295	719
hsa-let-7a-3p	0.0115612	0.969058	0.99817	387	179	256	274	160	178	170	151
hsa-miR-4797-3p	0.0109536	0.991361	0.99817	8	2	4	1	2	0	5	2
hsa-miR-6850-3p	0.0105597	0.993071	0.99817	1	0	5	3	1	1	3	1
hsa-miR-551a	0.0104284	0.986987	0.99817	26	21	15	10	22	6	9	6
hsa-let-7b-3p	0.0103496	0.976368	0.99817	113	78	91	85	63	51	72	45
hsa-miR-3122	0.0093329	0.994103	0.99817	7	2	2	1	5	1	0	0
hsa-miR-1296-5p	0.00927367	0.981692	0.99817	165	34	87	60	47	54	62	33
hsa-miR-7-1-3p	0.00836678	0.982121	0.99817	87	43	58	39	38	29	44	27
hsa-miR-197-3p	0.00759164	0.987928	0.99817	1660	1559	3682	819	950	1009	1505	1649
hsa-miR-576-3p	0.00751804	0.988698	0.99817	38	18	15	10	10	6	22	12
hsa-miR-3162-3p	0.00743344	0.995937	0.99817	0	1	7	1	0	0	5	2
hsa-miR-1303	0.00703632	0.985655	0.99817	77	22	44	44	17	28	45	24
hsa-miR-484	0.00584046	0.985032	0.99817	2481	876	1567	900	774	867	946	822
hsa-miR-574-5p	0.00494113	0.99202	0.99817	283	282	720	295	125	262	482	241
hsa-miR-500b-5p	0.0045528	0.996429	0.99817	6	0	18	5	0	7	8	4
hsa-miR-330-5p	0.00430453	0.990326	0.99817	159	86	73	112	75	54	79	55
hsa-miR-34a-5p	0.00363525	0.996177	0.99817	37	11	129	17	8	18	58	48
hsa-miR-421	0.00325625	0.992356	0.99817	524	246	235	250	157	239	170	177
hsa-miR-548ah-5p	0.00234481	0.99817	0.99817	9	1	3	3	1	5	3	0
hsa-miR-616-3p	0.00196792	0.997714	0.99817	25	8	3	6	4	8	8	4
hsa-miR-4454	0.00195625	0.995452	0.99817	160	91	187	122	66	89	115	88
hsa-miR-3188	0.00160933	0.99804	0.99817	20	7	3	10	6	6	5	6
hsa-miR-181a-5p	0.000789329	0.997959	0.99817	11592	7386	5780	7286	5034	4010	6436	4670
hsa-miR-589-5p	-0.00214681	0.994897	0.99817	485	177	195	242	187	140	195	122
hsa-miR-548p	-0.00251025	0.997511	0.99817	96	24	4	12	12	40	8	8
hsa-miR-223-5p	-0.00285776	0.996276	0.99817	12035	5601	2214	4260	6509	3166	1650	1636
hsa-miR-2116-3p	-0.0033085	0.997758	0.99817	4	0	5	2	0	2	4	1
hsa-miR-1827	-0.00410073	0.992641	0.99817	37	21	19	20	11	12	26	13
hsa-miR-3661	-0.00498994	0.996218	0.99817	15	1	3	1	4	3	3	0
hsa-miR-4419a	-0.00551325	0.989668	0.99817	86	50	59	105	57	27	60	46
hsa-miR-3180-5p	-0.0081266	0.992604	0.99817	18	5	6	3	0	6	2	10
hsa-miR-330-3p	-0.00888379	0.983789	0.99817	1090	404	262	353	327	377	233	239
hsa-miR-6868-3p	-0.00928528	0.993014	0.99817	9	4	0	3	0	3	5	2
hsa-miR-3159	-0.0108055	0.991046	0.99817	1	3	9	3	4	1	4	2
hsa-miR-5192	-0.0109731	0.991407	0.99817	6	2	0	10	1	5	2	3
hsa-miR-487a-3p	-0.011248	0.982537	0.99817	35	16	33	12	7	21	18	14
hsa-miR-152-3p	-0.0122123	0.974572	0.99817	11249	2853	3157	4243	1853	4001	4262	2337
hsa-miR-3605-3p	-0.013316	0.988237	0.99817	7	5	5	3	0	1	9	4
hsa-miR-3617-5p	-0.0133328	0.983622	0.99817	7	9	15	7	7	7	6	5
hsa-miR-4645-3p	-0.0139115	0.973763	0.99817	56	37	45	27	19	26	24	35
hsa-miR-939-3p	-0.016237	0.987311	0.99817	5	1	2	4	2	3	1	1
hsa-miR-181c-3p	-0.0165152	0.960723	0.99817	678	291	244	286	188	264	227	213
hsa-miR-3960	-0.0185579	0.96703	0.99817	100	72	90	196	51	57	121	84
hsa-miR-339-3p	-0.0200241	0.94584	0.99817	1139	395	467	685	325	438	514	349
hsa-miR-212-3p	-0.0203298	0.972304	0.99817	18	7	15	12	9	3	8	12
hsa-miR-152-5p	-0.020438	0.972325	0.99817	15	5	14	11	4	7	7	10
hsa-miR-3177-3p	-0.0209378	0.969974	0.99817	135	35	27	60	45	54	26	15
hsa-miR-548a-3p	-0.0213998	0.969402	0.99817	20	9	15	13	6	15	7	7
hsa-miR-3685	-0.0224463	0.982652	0.99817	6	1	4	1	2	2	2	1
hsa-miR-452-5p	-0.0228526	0.96669	0.99817	290	98	288	185	42	61	195	261
hsa-miR-4791	-0.0246475	0.968563	0.99817	83	34	42	9	10	13	31	49
hsa-miR-3147	-0.0258624	0.969886	0.99817	10	6	5	12	2	3	9	8
hsa-miR-6842-3p	-0.0263008	0.956217	0.99817	402	162	70	136	136	118	124	67
hsa-miR-199b-5p	-0.0264689	0.955721	0.99817	1638	1301	967	510	511	395	1582	611
hsa-miR-3074-5p	-0.0283548	0.944818	0.99817	335	145	113	123	131	114	92	80
hsa-miR-1285-5p	-0.0295585	0.937667	0.99817	132	55	63	130	53	62	63	58
hsa-miR-23a-3p	-0.0337466	0.935822	0.99817	34173	18702	17635	10843	16040	12476	9830	10247
hsa-miR-3928-3p	-0.0341309	0.93756	0.99817	136	49	30	69	33	56	45	35
hsa-miR-222-3p	-0.0363945	0.910978	0.99817	5686	3112	4788	3831	3070	2147	2685	3018
hsa-miR-770-5p	-0.0367211	0.976484	0.99817	8	0	1	2	0	2	2	2
hsa-miR-1301-3p	-0.0374613	0.9309	0.99817	701	216	160	316	199	252	144	193
hsa-miR-24-3p	-0.0389277	0.915368	0.99817	661	262	206	257	216	230	216	159
hsa-miR-329-3p	-0.0413325	0.924402	0.99817	203	49	76	65	41	75	89	29
hsa-miR-3909	-0.0417223	0.931833	0.99817	37	18	17	16	8	21	15	11
hsa-miR-382-5p	-0.0418726	0.94919	0.99817	4431	898	291	854	483	1640	1006	338
hsa-miR-369-5p	-0.04188	0.947513	0.99817	98	12	19	23	14	41	13	11
hsa-miR-4326	-0.0421792	0.900232	0.99817	236	102	83	116	75	87	93	74
hsa-miR-655-3p	-0.0426182	0.92045	0.99817	180	54	101	40	39	72	66	47
hsa-miR-190b	-0.0428788	0.926767	0.99817	45	46	56	27	35	21	31	29
hsa-miR-151a-3p	-0.0441772	0.925031	0.99817	342133	110176	54902	131028	98589	116422	93173	56043
hsa-miR-744-3p	-0.0444559	0.940277	0.99817	53	12	19	9	13	20	7	11
hsa-miR-769-5p	-0.044506	0.86299	0.99817	1934	1032	1368	1161	796	741	1094	900
hsa-miR-6831-5p	-0.0473609	0.976908	0.99817	0	1	7	0	0	0	2	4
hsa-miR-3614-3p	-0.0480413	0.976035	0.99817	5	0	3	0	2	2	0	0
hsa-miR-7108-5p	-0.0512259	0.919853	0.99817	16	10	18	16	8	9	14	9
hsa-miR-548l	-0.0534174	0.930664	0.99817	28	19	14	9	19	8	13	4
hsa-let-7f-2-3p	-0.0563327	0.867696	0.99817	133	66	63	66	47	56	55	48
hsa-miR-6502-5p	-0.058808	0.942396	0.99817	7	6	7	1	4	2	5	3
hsa-miR-874-3p	-0.0594377	0.885762	0.99817	108	56	142	65	45	42	84	77
hsa-miR-3675-5p	-0.0597967	0.914936	0.99817	39	14	10	17	15	12	18	4
hsa-miR-98-3p	-0.0605819	0.895336	0.99817	74	54	139	53	35	65	61	56
hsa-miR-191-5p	-0.0630032	0.840034	0.99817	33517	17904	22835	15663	15640	12414	15263	13687
hsa-miR-548k	-0.0639824	0.880146	0.99817	75	58	36	66	46	37	44	28
hsa-miR-376a-3p	-0.0645676	0.890673	0.99817	111	31	73	35	16	58	47	34
hsa-miR-218-5p	-0.0652482	0.930855	0.99817	63	30	248	47	17	61	193	28
hsa-miR-4538	-0.0660872	0.962167	0.99817	0	3	4	2	0	1	7	0
hsa-miR-4709-3p	-0.0672273	0.949126	0.99817	5	1	1	4	1	1	3	2
hsa-miR-1260b	-0.0672715	0.888172	0.99817	668	361	1492	524	413	394	601	646
hsa-miR-4660	-0.0673522	0.934472	0.99817	5	5	2	7	4	2	5	2
hsa-miR-4508	-0.0676048	0.845785	0.99817	353	135	143	227	115	109	131	178
hsa-miR-4747-5p	-0.0678341	0.954228	0.99817	4	2	0	6	0	1	2	5
hsa-miR-361-5p	-0.0683611	0.87564	0.99817	838	436	866	271	439	325	328	424
hsa-miR-224-3p	-0.0698081	0.944483	0.99817	6	0	8	4	1	3	1	6
hsa-miR-6126	-0.0700828	0.923374	0.99817	5	6	27	12	7	3	13	13
hsa-miR-10a-5p	-0.070322	0.926568	0.99817	87	21	299	64	18	34	197	102
hsa-miR-548aq-3p	-0.0719094	0.937353	0.99817	11	2	1	4	1	2	5	3
hsa-miR-223-3p	-0.0733069	0.870603	0.99817	29483	23408	19951	11260	17718	13013	9580	13568
hsa-miR-21-3p	-0.0735839	0.868551	0.99817	835	394	1130	397	244	327	746	579
hsa-miR-362-5p	-0.0740138	0.913002	0.99817	57	45	207	54	25	19	126	102
hsa-miR-548ah-3p	-0.077014	0.927654	0.99817	98	22	7	8	21	36	10	2
hsa-miR-139-5p	-0.0780334	0.831296	0.99817	1312	825	701	792	718	405	568	647
hsa-miR-132-3p	-0.0817496	0.826879	0.99817	223	127	147	74	96	83	103	87
hsa-miR-376b-3p	-0.0838224	0.938492	0.99817	5	2	3	1	3	1	3	0
hsa-miR-29a-5p	-0.0868957	0.89887	0.99817	6	7	11	8	6	2	10	5
hsa-miR-4433a-3p	-0.0875678	0.820603	0.99817	690	279	614	341	172	418	307	346
hsa-miR-3184-5p	-0.0887488	0.810652	0.99817	17128	5866	5355	7037	6262	5545	4798	4483
hsa-miR-23a-5p	-0.0904286	0.888948	0.99817	82	26	6	27	24	31	13	12
hsa-miR-4659a-5p	-0.0909098	0.891645	0.99817	32	7	5	8	7	4	6	13
hsa-miR-133b	-0.092501	0.871222	0.99817	63	8	22	17	5	22	19	19
hsa-miR-4430	-0.0946186	0.881306	0.99817	6	10	18	28	11	8	14	12
hsa-miR-4433a-5p	-0.0956571	0.870613	0.99817	542	185	79	236	203	237	86	70
hsa-miR-411-5p	-0.0965117	0.774868	0.996844	365	154	123	225	120	131	205	111
hsa-miR-6727-5p	-0.0982405	0.941686	0.99817	5	1	1	1	0	0	2	3
hsa-miR-548d-5p	-0.0993144	0.788084	0.99817	78	52	91	66	32	46	74	50
hsa-miR-550a-3p	-0.0993891	0.885181	0.99817	20	2	16	4	5	6	9	6
hsa-miR-4661-5p	-0.101203	0.882885	0.99817	9	4	6	8	3	3	5	7
hsa-miR-619-5p	-0.103534	0.808728	0.99817	69	29	47	79	27	28	41	54
hsa-miR-6500-3p	-0.104278	0.933117	0.99817	13	1	2	0	3	4	1	0
hsa-miR-3621	-0.104847	0.899627	0.99817	10	1	6	4	2	2	3	6
hsa-miR-337-3p	-0.105974	0.804214	0.99817	87	35	76	37	25	56	44	29
hsa-miR-3678-5p	-0.10598	0.907986	0.99817	9	7	1	1	3	2	4	3
hsa-miR-454-5p	-0.106845	0.823182	0.99817	76	13	21	26	14	23	31	15
hsa-miR-22-3p	-0.107183	0.749137	0.995351	3361	2153	2773	2324	1082	1819	3290	1438
hsa-miR-26b-5p	-0.107984	0.717659	0.992536	22728	10443	16527	10564	8239	11170	10282	9576
hsa-miR-1910-5p	-0.108008	0.904232	0.99817	2	1	8	6	3	2	4	3
hsa-miR-345-3p	-0.110035	0.898449	0.99817	8	1	8	2	2	4	3	3
hsa-miR-128-3p	-0.111014	0.742555	0.995351	2222	652	879	1043	794	803	709	617
hsa-miR-6877-5p	-0.111886	0.855101	0.99817	57	9	9	35	9	29	16	12
hsa-miR-548aa	-0.113182	0.732562	0.994918	93	47	80	77	44	46	65	47
hsa-miR-3131	-0.114057	0.862477	0.99817	8	10	5	10	3	5	8	8
hsa-miR-576-5p	-0.114783	0.796514	0.99817	132	80	246	97	62	86	152	99
hsa-miR-4687-3p	-0.116218	0.895775	0.99817	6	1	4	6	1	5	2	3
hsa-miR-3065-5p	-0.118434	0.836694	0.99817	16	7	14	8	6	5	8	11
hsa-miR-6847-5p	-0.118857	0.85401	0.99817	18	11	14	9	7	6	23	2
hsa-miR-6852-5p	-0.121654	0.805864	0.99817	1108	384	198	538	396	470	294	187
hsa-miR-1304-3p	-0.122502	0.720176	0.992536	563	242	193	233	187	215	199	183
hsa-miR-7110-5p	-0.124002	0.93487	0.99817	5	2	0	0	1	2	0	1
hsa-miR-5001-3p	-0.124494	0.835906	0.99817	10	6	16	9	6	5	11	7
hsa-miR-5010-5p	-0.125224	0.82434	0.99817	36	11	8	15	15	11	11	6
hsa-miR-138-5p	-0.125785	0.869076	0.99817	10	1	10	5	2	4	5	6
hsa-miR-410-3p	-0.125794	0.793501	0.99817	216	65	105	49	34	99	112	38
hsa-miR-423-3p	-0.125889	0.731926	0.994918	17025	5781	5306	7014	6269	5723	4942	4560
hsa-miR-1273a	-0.126464	0.728514	0.994763	159	84	84	150	66	53	114	98
hsa-miR-6880-3p	-0.126931	0.894501	0.99817	24	0	4	2	5	2	6	3
hsa-miR-539-5p	-0.127575	0.813319	0.99817	21	7	11	12	7	9	13	5
hsa-miR-151a-5p	-0.130472	0.765936	0.996844	653	332	1090	586	388	402	395	632
hsa-miR-641	-0.130747	0.772711	0.996844	123	92	69	91	91	43	47	69
hsa-miR-146b-3p	-0.132248	0.737267	0.995351	556	152	120	191	138	172	194	123
hsa-miR-3178	-0.132445	0.838706	0.99817	10	7	18	15	15	4	7	8
hsa-miR-5006-3p	-0.133381	0.864147	0.99817	4	6	12	3	4	7	4	3
hsa-miR-155-5p	-0.133419	0.650623	0.992536	1771	1013	929	1121	680	671	1350	705
hsa-miR-570-3p	-0.135408	0.889944	0.99817	3	5	3	1	2	2	4	1
hsa-miR-1273c	-0.136102	0.79298	0.99817	19	9	17	23	14	8	16	9
hsa-miR-3922-3p	-0.138103	0.794646	0.99817	26	13	13	12	7	5	21	12
hsa-miR-30b-3p	-0.13852	0.785451	0.99817	83	25	16	47	28	37	24	17
hsa-miR-4433b-3p	-0.139309	0.823936	0.99817	528	153	80	223	202	241	65	56
hsa-miR-345-5p	-0.139579	0.656662	0.992536	1089	475	740	531	482	516	518	354
hsa-miR-3916	-0.142125	0.771421	0.996844	20	23	18	30	16	12	22	17
hsa-miR-6087	-0.143507	0.818205	0.99817	17	10	26	9	8	3	23	12
hsa-miR-1271-5p	-0.144366	0.805665	0.99817	118	25	15	26	31	38	19	16
hsa-miR-485-3p	-0.144417	0.815799	0.99817	27	5	27	7	7	16	13	7
hsa-miR-181a-2-3p	-0.148008	0.585255	0.992536	751	348	370	497	297	319	430	292
hsa-miR-3615	-0.149095	0.611211	0.992536	727	281	328	291	222	218	409	246
hsa-miR-4498	-0.149184	0.844009	0.99817	6	5	5	5	5	2	6	2
hsa-miR-598-3p	-0.149345	0.681191	0.992536	194	57	170	102	73	92	100	82
hsa-miR-133a-5p	-0.150262	0.868703	0.99817	7	3	3	3	0	5	4	2
hsa-miR-4321	-0.150361	0.878222	0.99817	5	2	4	1	2	1	2	3
hsa-miR-940	-0.15697	0.755397	0.995351	30	13	14	23	8	14	11	21
hsa-miR-3130-5p	-0.157499	0.873657	0.99817	7	1	4	2	3	0	3	3
hsa-miR-221-3p	-0.157589	0.652332	0.992536	58580	19732	23520	29843	19968	26711	17251	19642
hsa-miR-4286	-0.159273	0.662902	0.992536	463	226	541	246	173	262	325	281
hsa-miR-6770-3p	-0.16302	0.856622	0.99817	4	2	2	7	1	3	5	2
hsa-miR-323a-3p	-0.164307	0.778809	0.997368	230	32	31	34	28	72	62	27
hsa-miR-671-5p	-0.164355	0.789211	0.99817	23	25	99	38	17	22	47	57
hsa-miR-1297	-0.164811	0.845788	0.99817	11	2	14	3	9	1	3	6
hsa-miR-4646-5p	-0.164894	0.838154	0.99817	8	2	4	7	2	7	3	2
hsa-miR-1270	-0.165273	0.801915	0.99817	15	3	8	8	7	3	5	7
hsa-miR-762	-0.165777	0.769596	0.996844	18	20	31	27	11	9	18	34
hsa-miR-653-5p	-0.166091	0.882638	0.99817	1	1	4	6	0	1	7	2
hsa-miR-758-3p	-0.167846	0.608012	0.992536	175	74	68	91	47	71	95	67
hsa-miR-1343-3p	-0.169559	0.812181	0.99817	14	3	10	8	2	7	3	11
hsa-miR-5582-3p	-0.170566	0.857536	0.99817	4	2	1	7	3	2	4	1
hsa-miR-656-3p	-0.171377	0.74947	0.995351	105	18	19	20	26	28	25	16
hsa-miR-26b-3p	-0.171934	0.715243	0.992536	88	47	84	29	43	57	32	35
hsa-miR-6512-5p	-0.173475	0.88707	0.99817	6	1	0	4	0	2	1	4
hsa-miR-342-3p	-0.175311	0.697017	0.992536	2229	2162	4655	1919	1583	1313	2806	2676
hsa-miR-4750-5p	-0.177134	0.703902	0.992536	69	36	20	78	27	34	44	39
hsa-miR-1260a	-0.179921	0.744686	0.995351	333	231	1160	427	360	217	556	492
hsa-miR-7705	-0.180625	0.875679	0.99817	6	1	1	2	2	2	0	2
hsa-miR-4638-3p	-0.183257	0.810635	0.99817	8	4	9	3	2	2	10	4
hsa-miR-365a-5p	-0.183301	0.755975	0.995351	25	8	13	18	3	16	21	6
hsa-miR-361-3p	-0.183781	0.645317	0.992536	6511	1931	1379	2542	1853	2237	2532	1336
hsa-miR-1268a	-0.186039	0.705599	0.992536	31	25	33	45	14	13	48	30
hsa-miR-6886-3p	-0.187498	0.851684	0.99817	3	2	5	1	2	2	3	1
hsa-miR-153-3p	-0.187764	0.881081	0.99817	5	1	3	0	2	0	3	1
hsa-miR-6786-3p	-0.188778	0.881876	0.99817	3	1	5	0	3	0	1	2
hsa-miR-548ay-5p	-0.189812	0.666495	0.992536	30	19	23	22	14	11	21	22
hsa-miR-151b	-0.190935	0.592301	0.992536	132	63	138	88	57	76	78	87
hsa-miR-584-5p	-0.192295	0.569868	0.992536	10290	3549	3498	5035	2694	4896	4314	3066
hsa-miR-128-1-5p	-0.194054	0.728548	0.994763	30	4	19	12	11	12	10	9
hsa-miR-21-5p	-0.194701	0.544627	0.992536	335651	147505	355803	225483	148786	159871	241294	213496
hsa-miR-1254	-0.194772	0.645257	0.992536	63	29	22	46	26	20	30	35
hsa-miR-219a-1-3p	-0.195329	0.704443	0.992536	252	159	222	497	107	350	171	196
hsa-miR-2276-5p	-0.197138	0.862714	0.99817	3	2	1	4	1	0	6	1
hsa-miR-134-5p	-0.199826	0.705373	0.992536	7036	1693	1403	1475	832	3169	2341	1006
hsa-miR-7849-3p	-0.200211	0.682933	0.992536	36	11	11	15	9	14	14	12
hsa-miR-409-3p	-0.200491	0.690912	0.992536	4341	883	691	986	597	1640	1365	676
hsa-miR-99b-3p	-0.200949	0.572253	0.992536	561	202	149	251	157	217	217	186
hsa-miR-212-5p	-0.201766	0.721008	0.992536	21	8	8	13	4	13	11	7
hsa-miR-7847-3p	-0.201866	0.809024	0.99817	5	2	8	6	7	1	5	2
hsa-miR-6820-3p	-0.20308	0.870691	0.99817	0	3	1	5	0	1	4	3
hsa-miR-7-5p	-0.20456	0.717586	0.992536	6656	4931	12888	5178	2434	1892	11448	8338
hsa-miR-29c-5p	-0.205556	0.615104	0.992536	121	53	146	68	40	78	105	63
hsa-miR-4659a-3p	-0.205803	0.751815	0.995351	15	8	5	9	9	6	9	2
hsa-miR-548ae-5p	-0.206104	0.677319	0.992536	20	11	21	13	9	8	18	13
hsa-miR-577	-0.207365	0.841026	0.99817	2	2	24	1	2	2	16	5
hsa-miR-3074-3p	-0.207694	0.722079	0.992536	35	9	12	14	6	21	15	5
hsa-miR-1284	-0.208316	0.777093	0.997368	8	6	9	2	6	4	5	3
hsa-miR-548al	-0.208726	0.805038	0.99817	9	1	11	5	5	2	11	1
hsa-miR-433-3p	-0.209829	0.735249	0.995107	231	30	26	38	37	79	52	20
hsa-miR-4781-3p	-0.210342	0.837523	0.99817	13	5	7	0	9	0	4	3
hsa-miR-320e	-0.211133	0.629871	0.992536	84	35	29	76	24	31	51	55
hsa-miR-495-3p	-0.214481	0.584808	0.992536	728	352	589	259	250	481	373	259
hsa-miR-30e-3p	-0.215545	0.61794	0.992536	11260	3400	2768	3471	3521	4528	2873	2299
hsa-miR-3529-3p	-0.217315	0.706745	0.992536	2174	1553	4277	1633	770	596	3792	2747
hsa-miR-3176	-0.218093	0.671601	0.992536	27	12	17	34	10	10	33	16
hsa-miR-3674	-0.218466	0.893892	0.99817	2	0	1	4	0	0	6	0
hsa-miR-1277-5p	-0.221114	0.551755	0.992536	58	24	37	49	25	25	42	30
hsa-miR-335-3p	-0.221889	0.505347	0.992536	409	160	281	143	144	185	198	165
hsa-miR-369-3p	-0.227822	0.582769	0.992536	528	115	206	117	90	192	215	143
hsa-miR-6862-5p	-0.228378	0.778851	0.997368	14	2	6	7	3	2	2	12
hsa-miR-4670-5p	-0.228958	0.866359	0.99817	6	1	1	0	0	2	1	2
hsa-miR-5693	-0.229157	0.829928	0.99817	14	2	1	2	1	0	4	7
hsa-miR-539-3p	-0.22916	0.67243	0.992536	87	12	47	28	8	34	40	36
hsa-miR-1268b	-0.22948	0.714601	0.992536	25	18	49	37	7	10	39	48
hsa-miR-4800-5p	-0.230856	0.760677	0.995585	10	7	1	10	7	4	4	5
hsa-miR-135a-3p	-0.231526	0.762177	0.995585	20	4	3	14	11	9	4	2
hsa-miR-93-3p	-0.233117	0.506145	0.992536	172	69	144	146	55	95	149	99
hsa-miR-671-3p	-0.233264	0.553463	0.992536	61	27	42	26	18	33	32	29
hsa-miR-4647	-0.235213	0.751866	0.995351	7	4	4	7	3	3	3	7
hsa-miR-548ag	-0.236689	0.592773	0.992536	44	24	41	41	34	19	23	32
hsa-miR-4655-5p	-0.238512	0.815414	0.99817	7	3	3	0	1	2	2	4
hsa-miR-6084	-0.239161	0.701117	0.992536	8	6	9	9	7	5	7	5
hsa-miR-6872-3p	-0.239342	0.643831	0.992536	112	9	54	47	31	23	59	36
hsa-miR-3691-5p	-0.239914	0.663045	0.992536	31	6	12	23	14	7	12	16
hsa-miR-1273g-3p	-0.240287	0.521774	0.992536	103	47	43	77	43	31	69	55
hsa-miR-27b-5p	-0.240347	0.57235	0.992536	245	79	269	122	66	158	169	130
hsa-miR-378b	-0.24153	0.699074	0.992536	15	5	12	9	2	5	14	10
hsa-miR-18a-3p	-0.241537	0.599644	0.992536	52	34	72	42	17	28	69	46
hsa-miR-205-5p	-0.244817	0.73884	0.995351	12	14	56	16	5	8	51	23
hsa-miR-3157-3p	-0.244996	0.746778	0.995351	14	3	5	6	8	3	7	1
hsa-miR-148b-3p	-0.245674	0.544213	0.992536	55406	17847	12727	18131	18807	19292	16594	13538
hsa-miR-382-3p	-0.245852	0.627275	0.992536	535	96	95	137	83	213	177	78
hsa-miR-1273e	-0.246667	0.522876	0.992536	119	73	124	177	80	73	133	96
hsa-miR-136-3p	-0.247854	0.583364	0.992536	502	152	340	161	77	265	348	156
hsa-miR-664b-3p	-0.250178	0.722106	0.992536	8	4	8	5	2	3	7	7
hsa-miR-221-5p	-0.250611	0.431121	0.992536	851	408	524	568	502	349	428	400
hsa-miR-3678-3p	-0.252663	0.822723	0.99817	6	3	0	1	1	2	2	2
hsa-miR-1226-3p	-0.255038	0.797617	0.99817	6	0	4	4	3	1	5	1
hsa-miR-494-3p	-0.255979	0.602702	0.992536	379	85	101	79	86	168	92	63
hsa-miR-181a-3p	-0.257145	0.497612	0.992536	213	167	175	245	169	108	156	176
hsa-miR-1181	-0.257947	0.671328	0.992536	14	13	20	17	8	11	31	4
hsa-miR-3190-3p	-0.259283	0.645713	0.992536	29	9	6	9	7	9	13	8
hsa-miR-6826-5p	-0.259893	0.756188	0.995351	7	2	2	6	4	3	3	2
hsa-miR-3687	-0.261083	0.678304	0.992536	14	6	5	14	3	7	8	11
hsa-miR-3135b	-0.261684	0.602935	0.992536	306	104	311	460	251	230	126	231
hsa-miR-7107-3p	-0.261742	0.826631	0.99817	6	1	0	2	1	2	2	1
hsa-let-7d-3p	-0.261875	0.417189	0.992536	1481	735	655	803	754	614	738	535
hsa-miR-4767	-0.262604	0.762416	0.995585	2	2	6	6	3	2	6	2
hsa-miR-4664-3p	-0.263227	0.646548	0.992536	21	10	5	19	7	7	13	14
hsa-miR-26a-5p	-0.264079	0.458393	0.992536	180516	68923	70672	83553	82773	74253	60074	58822
hsa-miR-4757-3p	-0.269607	0.756768	0.995351	7	3	6	1	1	2	6	4
hsa-miR-425-5p	-0.270395	0.414649	0.992536	4225	3039	4651	3486	3186	2369	3423	2868
hsa-miR-659-5p	-0.271064	0.569367	0.992536	28	15	20	13	14	15	20	8
hsa-miR-8485	-0.27261	0.656508	0.992536	11	12	49	19	15	14	32	15
hsa-miR-4492	-0.273355	0.59572	0.992536	22	16	30	39	15	14	44	16
hsa-miR-4727-3p	-0.274336	0.846337	0.99817	3	5	0	0	3	2	0	1
hsa-miR-505-5p	-0.275443	0.654597	0.992536	32	16	8	16	23	8	15	5
hsa-miR-4433b-5p	-0.276439	0.46512	0.992536	684	229	535	328	184	413	310	376
hsa-miR-326	-0.276456	0.472421	0.992536	1962	637	1576	1207	658	1337	796	1057
hsa-miR-6804-5p	-0.27663	0.784767	0.99817	3	0	4	5	2	3	3	1
hsa-miR-566	-0.27695	0.667965	0.992536	13	5	7	15	7	2	14	8
hsa-miR-106a-3p	-0.279193	0.662773	0.992536	13	5	14	12	3	5	21	7
hsa-miR-942-5p	-0.280367	0.344227	0.992536	169	74	85	89	60	75	106	70
hsa-miR-1261	-0.280625	0.642037	0.992536	133	96	53	107	153	37	48	38
hsa-miR-4532	-0.282875	0.651634	0.992536	24	18	63	12	23	10	46	18
hsa-miR-6796-5p	-0.284411	0.769706	0.996844	7	0	3	5	2	2	6	1
hsa-miR-3115	-0.285342	0.596722	0.992536	26	9	9	20	5	16	17	10
hsa-miR-30d-5p	-0.291449	0.393463	0.992536	121245	35126	41878	50072	35237	55999	47018	34610
hsa-miR-625-3p	-0.292771	0.450752	0.992536	1378	441	523	761	652	609	414	454
hsa-miR-6509-5p	-0.293732	0.710815	0.992536	10	5	2	4	4	3	2	6
hsa-miR-6761-5p	-0.295377	0.730281	0.994763	8	3	3	3	2	5	1	4
hsa-miR-1287-5p	-0.296526	0.386274	0.992536	174	66	79	99	42	71	110	93
hsa-miR-1307-3p	-0.297546	0.536828	0.992536	4697	1274	835	1292	1767	1463	1111	901
hsa-miR-625-5p	-0.297644	0.431251	0.992536	1409	440	558	808	633	644	426	519
hsa-miR-377-5p	-0.300465	0.516298	0.992536	50	19	35	24	13	31	42	13
hsa-miR-532-3p	-0.301219	0.515528	0.992536	53	31	85	42	21	38	77	39
hsa-miR-4716-3p	-0.304087	0.752246	0.995351	1	6	5	5	0	6	3	6
hsa-miR-4531	-0.304432	0.521708	0.992536	37	17	12	19	19	12	20	12
hsa-miR-132-5p	-0.310225	0.562415	0.992536	25	16	9	14	15	12	16	6
hsa-miR-6829-3p	-0.312188	0.842327	0.99817	8	0	0	3	5	0	0	1
hsa-miR-449b-5p	-0.313263	0.697199	0.992536	44	12	35	35	4	3	93	14
hsa-miR-3124-5p	-0.313541	0.517017	0.992536	27	10	12	24	13	15	16	11
hsa-miR-6785-3p	-0.313756	0.703291	0.992536	9	2	2	11	6	6	2	3
hsa-miR-3929	-0.317152	0.539611	0.992536	32	13	9	32	18	15	20	12
hsa-miR-490-3p	-0.317631	0.628939	0.992536	28	5	8	16	3	20	12	6
hsa-miR-4526	-0.319312	0.716764	0.992536	8	1	2	6	5	2	3	2
hsa-miR-141-3p	-0.321611	0.682242	0.992536	53	27	135	35	7	17	182	33
hsa-miR-383-5p	-0.323967	0.7752	0.996844	9	0	1	8	3	7	2	0
hsa-miR-3690	-0.32461	0.683598	0.992536	9	4	6	2	2	2	10	3
hsa-miR-374b-5p	-0.325709	0.410867	0.992536	1748	991	2566	1106	1127	1187	1246	1469
hsa-miR-374c-3p	-0.326887	0.409396	0.992536	1719	1017	2509	1063	1098	1147	1237	1488
hsa-miR-33a-3p	-0.329549	0.507319	0.992536	22	19	29	13	17	10	23	18
hsa-miR-8061	-0.329581	0.796761	0.99817	6	2	1	0	1	3	0	2
hsa-miR-556-5p	-0.329787	0.585092	0.992536	39	16	8	17	26	8	15	8
hsa-miR-154-3p	-0.330753	0.753045	0.995351	7	3	6	0	0	6	2	4
hsa-miR-30d-3p	-0.33254	0.327697	0.992536	125	49	65	48	37	53	68	60
hsa-miR-26a-2-3p	-0.333955	0.465582	0.992536	21	13	23	21	11	17	20	15
hsa-miR-4485-3p	-0.334714	0.618213	0.992536	10	2	7	11	4	5	6	8
hsa-miR-3132	-0.336263	0.767721	0.996844	5	0	1	6	3	0	4	2
hsa-miR-889-3p	-0.336548	0.552962	0.992536	965	154	166	156	109	418	284	139
hsa-miR-4765	-0.33863	0.687232	0.992536	6	2	7	3	1	3	3	7
hsa-miR-199a-3p	-0.338992	0.281838	0.992536	32174	11590	11785	12250	11834	13287	13233	11039
hsa-miR-6124	-0.343695	0.67002	0.992536	10	2	2	5	2	3	4	5
hsa-miR-933	-0.344673	0.646499	0.992536	6	4	5	7	6	3	2	6
hsa-miR-6770-5p	-0.345551	0.767606	0.996844	7	0	1	3	0	2	4	2
hsa-miR-589-3p	-0.347169	0.553744	0.992536	16	5	11	9	4	6	16	7
hsa-miR-28-3p	-0.34919	0.321374	0.992536	12244	4473	4742	3796	3791	5932	5481	3487
hsa-miR-1236-5p	-0.35037	0.678749	0.992536	3	2	3	8	3	3	3	4
hsa-miR-3168	-0.350958	0.528662	0.992536	26	7	6	17	7	11	17	8
hsa-miR-4644	-0.352042	0.667311	0.992536	5	3	3	4	3	2	4	3
hsa-miR-6812-5p	-0.353651	0.697169	0.992536	8	0	3	11	3	7	2	4
hsa-miR-199b-3p	-0.355392	0.275082	0.992536	16461	5571	5837	6127	6160	6719	6525	5389
hsa-miR-4724-5p	-0.355462	0.696425	0.992536	6	7	4	0	2	5	3	4
hsa-miR-3976	-0.35639	0.624697	0.992536	8	2	12	4	5	5	4	6
hsa-miR-1226-5p	-0.356401	0.74726	0.995351	3	2	2	3	1	0	7	1
hsa-miR-429	-0.356451	0.707403	0.992536	69	28	462	27	16	28	394	136
hsa-miR-3613-3p	-0.358416	0.518003	0.992536	17	19	28	14	18	6	24	19
hsa-miR-431-3p	-0.359436	0.490572	0.992536	62	15	12	17	11	27	22	16
hsa-miR-95-3p	-0.360663	0.365816	0.992536	455	126	250	200	88	140	331	255
hsa-miR-4513	-0.360787	0.63081	0.992536	8	5	2	16	4	9	10	3
hsa-miR-30a-5p	-0.3611	0.366831	0.992536	15560	6420	10626	9149	3341	11727	12520	6266
hsa-miR-6861-5p	-0.362658	0.749883	0.995351	5	0	1	4	3	1	1	2
hsa-miR-1469	-0.36557	0.642671	0.992536	12	5	22	7	11	0	15	12
hsa-miR-4802-5p	-0.365828	0.706299	0.992536	5	0	4	4	3	2	4	1
hsa-miR-154-5p	-0.368586	0.583507	0.992536	50	4	37	11	5	29	28	14
hsa-miR-8059	-0.369247	0.748405	0.995351	3	2	1	4	0	6	1	1
hsa-miR-19b-1-5p	-0.373464	0.719989	0.992536	4	1	11	1	0	2	8	5
hsa-miR-9-5p	-0.373816	0.404136	0.992536	178	89	126	114	49	60	253	86
hsa-miR-7843-5p	-0.377209	0.729633	0.994763	5	1	5	0	3	2	1	2
hsa-miR-8072	-0.378513	0.717058	0.992536	7	1	3	5	0	2	1	9
hsa-miR-8085	-0.380534	0.556762	0.992536	10	5	5	9	3	4	9	8
hsa-miR-3656	-0.381339	0.400162	0.992536	67	41	51	97	29	37	106	55
hsa-miR-199a-5p	-0.381899	0.248864	0.992536	17367	5786	5212	7108	6394	6880	7249	5883
hsa-miR-5189-3p	-0.38376	0.682778	0.992536	10	3	8	1	0	3	13	3
hsa-miR-5006-5p	-0.385267	0.665868	0.992536	10	3	2	1	2	2	4	4
hsa-miR-4470	-0.386503	0.485281	0.992536	14	9	12	8	7	12	9	7
hsa-miR-6511b-3p	-0.389077	0.618315	0.992536	4	4	13	2	4	4	7	5
hsa-miR-210-3p	-0.389479	0.431662	0.992536	349	178	367	241	74	130	494	317
hsa-miR-224-5p	-0.39202	0.396332	0.992536	1162	209	351	560	434	295	282	595
hsa-miR-4472	-0.392694	0.595302	0.992536	15	8	41	19	9	2	33	31
hsa-miR-339-5p	-0.393167	0.332083	0.992536	697	246	951	537	363	423	618	596
hsa-miR-4419b	-0.393847	0.528857	0.992536	8	6	9	12	3	6	14	8
hsa-miR-548i	-0.394116	0.566472	0.992536	4	6	9	8	6	3	9	6
hsa-miR-7156-5p	-0.395483	0.650557	0.992536	1	4	10	7	5	1	11	4
hsa-miR-2681-3p	-0.397395	0.697136	0.992536	11	1	3	1	0	2	6	4
hsa-miR-452-3p	-0.397641	0.599175	0.992536	7	3	20	9	2	4	15	14
hsa-miR-23c	-0.398358	0.604543	0.992536	12	3	17	6	8	15	4	2
hsa-miR-4775	-0.401221	0.666766	0.992536	2	2	5	3	4	2	2	2
hsa-miR-548ad-5p	-0.401732	0.429581	0.992536	18	13	26	21	8	14	32	16
hsa-miR-7706	-0.403358	0.410732	0.992536	60	25	13	19	13	28	34	18
hsa-miR-133a-3p	-0.403725	0.404302	0.992536	672	69	266	206	115	291	248	216
hsa-miR-130a-5p	-0.404653	0.427873	0.992536	32	23	70	27	24	24	36	47
hsa-miR-186-3p	-0.406614	0.623856	0.992536	7	2	7	3	2	8	3	2
hsa-miR-664b-5p	-0.408167	0.425891	0.992536	33	14	13	12	19	13	11	12
hsa-miR-1258	-0.411278	0.698364	0.992536	8	1	4	1	1	7	1	1
hsa-miR-148a-5p	-0.415045	0.319733	0.992536	1094	351	382	323	321	608	474	232
hsa-miR-28-5p	-0.416381	0.310494	0.992536	1293	334	360	371	371	609	427	316
hsa-miR-340-3p	-0.419578	0.324133	0.992536	100	42	120	61	71	67	53	68
hsa-miR-3681-5p	-0.42134	0.696832	0.992536	6	0	4	2	3	3	3	0
hsa-miR-6753-3p	-0.42229	0.493345	0.992536	10	8	8	6	5	6	6	10
hsa-miR-6516-3p	-0.422336	0.429981	0.992536	24	11	9	16	8	6	17	19
hsa-miR-643	-0.4225	0.619296	0.992536	5	6	2	2	3	4	4	2
hsa-miR-203a-5p	-0.424505	0.706593	0.992536	2	2	37	2	1	1	31	12
hsa-miR-4281	-0.426093	0.72327	0.992536	5	2	1	0	2	1	1	2
hsa-miR-483-3p	-0.426158	0.468419	0.992536	47	9	23	13	10	34	12	12
hsa-miR-708-3p	-0.430685	0.383487	0.992536	55	29	16	29	19	19	59	16
hsa-miR-6867-5p	-0.432132	0.648117	0.992536	2	2	4	5	0	4	5	3
hsa-miR-1185-2-3p	-0.43249	0.440201	0.992536	25	10	13	7	4	14	19	9
hsa-miR-193b-3p	-0.43315	0.495656	0.992536	177	58	236	84	18	201	97	143
hsa-miR-378i	-0.433765	0.389075	0.992536	1057	309	1389	453	269	621	1307	622
hsa-miR-4466	-0.43415	0.400487	0.992536	40	16	31	11	12	12	43	18
hsa-miR-30b-5p	-0.434856	0.37846	0.992536	3755	3234	10464	3861	2886	5005	5133	6088
hsa-miR-5188	-0.435196	0.697835	0.992536	6	1	1	2	1	0	4	3
hsa-miR-196b-5p	-0.435786	0.433459	0.992536	395	193	617	312	131	138	425	651
hsa-miR-548h-5p	-0.43688	0.613439	0.992536	40	5	4	7	3	26	3	5
hsa-miR-1224-5p	-0.444873	0.452451	0.992536	26	15	33	31	9	17	65	11
hsa-miR-610	-0.445065	0.658325	0.992536	9	3	2	0	3	2	5	1
hsa-miR-6880-5p	-0.446537	0.522439	0.992536	9	8	31	34	11	7	19	38
hsa-miR-378j	-0.449019	0.58618	0.992536	5	3	4	5	3	6	1	4
hsa-miR-4482-3p	-0.452636	0.560793	0.992536	26	1	5	10	7	13	8	2
hsa-miR-4744	-0.454622	0.708817	0.992536	5	2	2	2	0	0	1	8
hsa-miR-195-5p	-0.456425	0.451328	0.992536	32	8	38	11	8	12	45	15
hsa-miR-511-5p	-0.457445	0.474142	0.992536	12	10	5	6	7	8	11	3
hsa-miR-378c	-0.459067	0.366278	0.992536	1323	782	2050	778	368	947	2460	959
hsa-miR-1295a	-0.460671	0.712813	0.992536	6	0	1	2	1	2	4	0
hsa-miR-365b-3p	-0.462696	0.472072	0.992536	19	10	14	5	4	20	8	8
hsa-miR-2277-5p	-0.463537	0.25878	0.992536	32	26	32	36	26	23	32	31
hsa-miR-203b-5p	-0.466641	0.617968	0.992536	248	68	1319	90	61	115	1447	228
hsa-miR-30a-3p	-0.467077	0.355254	0.992536	1770	424	428	600	366	1160	594	320
hsa-miR-548j-5p	-0.468167	0.234624	0.992536	86	52	39	69	44	57	45	63
hsa-miR-6737-3p	-0.468867	0.65111	0.992536	4	1	9	0	1	4	3	4
hsa-miR-6859-3p	-0.469508	0.772952	0.996844	2	0	2	2	0	0	6	0
hsa-miR-27a-5p	-0.473327	0.251508	0.992536	302	185	326	307	128	166	522	254
hsa-miR-485-5p	-0.476005	0.312075	0.992536	260	61	60	77	61	137	104	50
hsa-miR-487b-3p	-0.476845	0.304066	0.992536	376	93	180	78	88	224	160	98
hsa-miR-4800-3p	-0.478369	0.379988	0.992536	26	11	44	27	9	18	45	29
hsa-miR-6836-3p	-0.478976	0.479043	0.992536	6	3	7	10	5	7	7	4
hsa-miR-4742-5p	-0.479459	0.635056	0.992536	4	3	0	7	6	1	3	2
hsa-miR-6882-5p	-0.479859	0.601452	0.992536	3	4	2	3	2	1	3	5
hsa-miR-378f	-0.481112	0.354203	0.992536	73	29	113	42	22	69	102	43
hsa-miR-6501-5p	-0.481704	0.478378	0.992536	11	3	3	11	4	6	9	5
hsa-miR-203a-3p	-0.481713	0.599531	0.992536	263	71	1321	115	63	115	1481	253
hsa-miR-3196	-0.485138	0.492377	0.992536	10	4	27	17	5	5	31	16
hsa-miR-4290	-0.486015	0.71269	0.992536	5	2	0	1	4	0	1	1
hsa-miR-6125	-0.486882	0.483017	0.992536	8	4	7	7	3	2	12	7
hsa-miR-3136-5p	-0.487593	0.526168	0.992536	7	4	14	3	2	3	15	7
hsa-miR-1265	-0.487904	0.712356	0.992536	6	0	1	1	2	0	3	1
hsa-miR-3662	-0.489005	0.633812	0.992536	4	1	5	2	1	0	6	4
hsa-miR-4713-5p	-0.489278	0.624786	0.992536	6	1	2	2	3	1	4	1
hsa-miR-203b-3p	-0.491259	0.621161	0.992536	4	1	35	3	3	3	30	9
hsa-miR-3170	-0.491703	0.343226	0.992536	32	15	10	25	13	8	25	26
hsa-miR-378g	-0.494085	0.301732	0.992536	122	39	108	52	29	76	143	43
hsa-miR-23b-5p	-0.494952	0.320922	0.992536	57	10	16	24	20	22	33	11
hsa-miR-135a-5p	-0.497246	0.491976	0.992536	11	7	16	5	6	1	13	16
hsa-miR-181b-2-3p	-0.497466	0.484968	0.992536	12	4	2	7	4	7	7	3
hsa-miR-4488	-0.499028	0.253975	0.992536	103	31	46	88	56	72	43	48
hsa-miR-1273d	-0.501888	0.325132	0.992536	34	16	14	32	31	16	20	14
hsa-miR-6878-5p	-0.511035	0.609194	0.992536	3	2	2	3	1	1	2	5
hsa-miR-6810-5p	-0.512483	0.649722	0.992536	9	0	4	0	1	3	4	2
hsa-miR-1291	-0.512514	0.443952	0.992536	8	5	10	13	4	3	12	15
hsa-miR-4463	-0.516082	0.453321	0.992536	8	4	4	12	2	7	10	7
hsa-miR-1277-3p	-0.517358	0.451552	0.992536	20	1	8	9	3	7	15	7
hsa-miR-616-5p	-0.519526	0.516398	0.992536	9	7	14	1	13	5	6	3
hsa-miR-711	-0.520155	0.714753	0.992536	1	0	0	12	0	5	1	6
hsa-miR-301a-5p	-0.521607	0.282474	0.992536	62	31	14	23	33	17	34	27
hsa-miR-595	-0.522063	0.449269	0.992536	10	2	7	5	3	4	8	6
hsa-miR-4278	-0.523121	0.633226	0.992536	1	0	8	3	2	2	7	1
hsa-miR-3191-5p	-0.525273	0.417435	0.992536	22	6	9	11	6	21	5	7
hsa-miR-8060	-0.526126	0.583353	0.992536	4	6	0	6	2	1	6	7
hsa-miR-581	-0.526364	0.388873	0.992536	40	13	6	10	15	20	14	6
hsa-miR-7976	-0.526821	0.303032	0.992536	50	17	13	27	17	19	49	11
hsa-miR-6752-3p	-0.52715	0.508142	0.992536	6	5	7	3	1	2	12	6
hsa-miR-6793-5p	-0.528148	0.556649	0.992536	27	2	4	5	6	16	1	3
hsa-miR-378d	-0.533463	0.284498	0.992536	1155	613	1545	648	290	941	1982	721
hsa-miR-365b-5p	-0.535107	0.464371	0.992536	12	2	10	3	6	7	3	6
hsa-miR-6767-5p	-0.53689	0.480823	0.992536	6	4	21	4	2	9	16	8
hsa-miR-409-5p	-0.536989	0.344919	0.992536	343	73	34	124	61	191	132	70
hsa-miR-375	-0.537983	1	1	2341	660	16723	1450	815	1629	21040	1211
hsa-miR-422a	-0.542111	0.219714	0.992536	60	20	28	20	14	29	29	38
hsa-miR-4449	-0.543246	0.286315	0.992536	17	7	14	19	9	9	20	15
hsa-miR-4778-5p	-0.543975	0.597612	0.992536	1	7	0	8	6	5	2	3
hsa-miR-5694	-0.547916	0.536948	0.992536	7	2	4	1	2	2	3	5
hsa-miR-6733-5p	-0.548937	0.553104	0.992536	6	2	5	1	3	1	2	6
hsa-miR-6819-5p	-0.550069	0.579889	0.992536	1	3	1	5	2	2	3	3
hsa-miR-885-3p	-0.552094	1	1	86	8	2	5	3	48	5	10
hsa-miR-4521	-0.552326	0.486862	0.992536	10	2	11	8	2	1	16	11
hsa-miR-378e	-0.553651	0.34555	0.992536	42	7	56	16	13	19	45	34
hsa-miR-125b-1-3p	-0.55995	0.467548	0.992536	38	6	2	13	2	16	25	7
hsa-miR-7851-3p	-0.560623	0.417257	0.992536	9	7	4	14	4	6	6	16
hsa-miR-4701-5p	-0.561084	0.470003	0.992536	6	5	20	2	6	7	5	13
hsa-miR-664a-3p	-0.563176	0.233453	0.992536	91	48	164	47	73	75	87	90
hsa-miR-6739-5p	-0.563383	0.615013	0.992536	9	0	1	5	2	0	3	7
hsa-miR-7855-5p	-0.563415	0.55381	0.992536	4	3	2	4	3	0	8	2
hsa-miR-5787	-0.564554	0.27359	0.992536	26	13	26	52	14	32	37	30
hsa-miR-124-3p	-0.576202	0.570585	0.992536	7	1	3	2	0	1	7	4
hsa-miR-5685	-0.583754	0.567262	0.992536	2	1	2	7	0	3	4	5
hsa-miR-5010-3p	-0.584465	0.335655	0.992536	21	9	42	13	10	11	46	20
hsa-miR-4503	-0.589108	0.635275	0.992536	1	1	5	1	0	1	7	1
hsa-miR-652-5p	-0.596794	0.392626	0.992536	8	12	34	12	12	5	18	33
hsa-miR-328-3p	-0.602196	0.0552328	0.943954	493	226	441	270	258	360	362	353
hsa-miR-3195	-0.602959	0.170749	0.992536	39	24	52	28	22	28	65	30
hsa-miR-210-5p	-0.603956	0.493723	0.992536	5	3	4	2	1	1	7	5
hsa-miR-4721	-0.608118	0.537909	0.992536	4	5	1	1	1	2	3	5
hsa-miR-378a-3p	-0.609378	0.197485	0.992536	25041	10208	28427	12665	6530	19212	37878	13913
hsa-miR-6780a-5p	-0.610936	0.363891	0.992536	17	4	5	6	8	3	14	4
hsa-miR-365a-3p	-0.612075	0.373555	0.992536	13	11	20	4	9	23	9	5
hsa-let-7e-3p	-0.613518	0.43029	0.992536	5	6	8	1	3	5	5	7
hsa-miR-4525	-0.614233	0.664114	0.992536	5	0	2	0	0	1	3	2
hsa-miR-145-3p	-0.614816	0.145008	0.992536	1156	688	480	593	638	963	812	331
hsa-miR-195-3p	-0.616896	0.294019	0.992536	44	8	16	18	8	23	42	7
hsa-miR-6760-5p	-0.620328	0.525902	0.992536	4	2	4	2	5	0	2	4
hsa-miR-125b-2-3p	-0.628142	1	1	657	69	60	131	43	489	97	52
hsa-miR-548n	-0.629041	0.330138	0.992536	14	9	15	6	11	2	13	17
hsa-miR-574-3p	-0.631636	0.196295	0.992536	628	183	583	220	153	607	445	301
hsa-miR-147b	-0.632116	1	1	93	56	194	70	34	42	376	37
hsa-miR-873-3p	-0.642441	0.291833	0.992536	14	8	6	15	13	10	5	12
hsa-miR-5000-3p	-0.642549	0.526305	0.992536	8	0	4	5	2	1	13	1
hsa-miR-3652	-0.645603	0.515641	0.992536	3	1	1	5	1	2	4	3
hsa-miR-5095	-0.645782	0.285886	0.992536	7	10	6	13	9	9	9	10
hsa-miR-1537-3p	-0.647037	0.56985	0.992536	2	1	5	0	2	1	3	2
hsa-miR-192-3p	-0.648687	0.407653	0.992536	21	7	53	6	3	22	54	16
hsa-miR-6772-3p	-0.651897	0.528961	0.992536	6	0	1	4	1	3	4	2
hsa-miR-2392	-0.653233	0.081499	0.992536	385	122	271	344	281	175	405	226
hsa-miR-504-5p	-0.661556	0.19102	0.992536	21	7	21	13	7	15	24	16
hsa-miR-3943	-0.661567	0.576398	0.992536	1	2	3	1	1	0	5	2
hsa-miR-548b-5p	-0.661804	0.345429	0.992536	20	4	3	5	3	11	7	7
hsa-miR-5088-5p	-0.667755	0.537134	0.992536	5	5	0	1	1	1	7	3
hsa-miR-3684	-0.674037	0.441105	0.992536	7	3	1	4	3	2	2	7
hsa-miR-3192-3p	-0.676065	0.303603	0.992536	15	8	6	11	18	3	10	7
hsa-miR-1227-5p	-0.679917	0.670932	0.992536	1	0	4	3	7	0	0	0
hsa-miR-6743-5p	-0.680449	0.525281	0.992536	0	1	6	3	1	3	3	4
hsa-miR-6787-5p	-0.683132	0.396733	0.992536	16	2	3	8	3	1	10	13
hsa-miR-378h	-0.684969	0.260189	0.992536	7	7	15	7	6	10	16	7
hsa-miR-1228-5p	-0.691669	0.355303	0.992536	4	2	7	7	5	2	8	6
hsa-miR-99b-5p	-0.695292	0.0247226	0.943954	4217	1022	2046	2204	1581	2097	2942	2409
hsa-miR-30c-5p	-0.698327	0.0576549	0.943954	4107	2517	6089	3253	3299	4488	4758	4020
hsa-miR-23b-3p	-0.699922	0.0569111	0.943954	6529	2605	4626	2865	3092	5789	3472	3565
hsa-miR-6837-3p	-0.702081	0.197381	0.992536	27	7	7	11	9	15	10	14
hsa-miR-370-5p	-0.707277	0.41925	0.992536	13	2	1	2	3	5	6	2
hsa-miR-548g-5p	-0.708038	0.431025	0.992536	10	4	0	2	4	3	5	3
hsa-miR-331-3p	-0.710553	0.115586	0.992536	175	59	246	101	85	131	188	193
hsa-miR-4678	-0.717062	0.50858	0.992536	0	2	3	4	1	1	6	3
hsa-miR-526a	-0.71803	0.392428	0.992536	5	3	3	3	3	1	8	3
hsa-miR-4792	-0.718288	0.0577005	0.943954	110	63	81	125	94	67	165	80
hsa-miR-187-3p	-0.722745	0.368179	0.992536	8	2	4	3	3	7	2	4
hsa-miR-18b-3p	-0.723855	0.35099	0.992536	6	5	2	3	3	4	7	3
hsa-miR-3157-5p	-0.725218	0.392442	0.992536	6	5	11	1	3	4	3	14
hsa-miR-216b-5p	-0.727881	0.574827	0.992536	6	2	0	1	1	6	1	0
hsa-miR-7641	-0.728281	0.0934215	0.992536	911	392	1000	1037	1069	430	1191	780
hsa-miR-650	-0.741907	0.581501	0.992536	5	0	2	1	0	0	5	3
hsa-miR-3164	-0.743892	0.394651	0.992536	15	5	1	1	2	8	8	3
hsa-miR-99a-5p	-0.746479	0.320116	0.992536	54536	5311	4813	10447	5267	38800	12357	4464
hsa-miR-548ap-5p	-0.754851	0.38751	0.992536	1	5	5	3	6	4	4	2
hsa-miR-219a-2-3p	-0.756805	0.401952	0.992536	3	2	2	4	3	1	5	3
hsa-miR-7704	-0.757416	0.166829	0.992536	56	28	25	88	71	31	82	27
hsa-miR-6758-5p	-0.75851	0.486185	0.992536	4	0	3	3	0	3	2	5
hsa-miR-130b-5p	-0.773402	0.259782	0.992536	19	3	47	14	26	19	13	26
hsa-miR-20a-3p	-0.785147	0.374746	0.992536	3	1	14	3	7	6	2	7
hsa-miR-1266-5p	-0.785287	0.327554	0.992536	7	4	12	8	2	1	18	16
hsa-miR-505-3p	-0.786536	0.0555748	0.943954	226	94	251	97	123	202	168	208
hsa-miR-6789-5p	-0.796898	0.181038	0.992536	9	5	10	10	10	4	15	9
hsa-miR-4473	-0.79882	0.273019	0.992536	12	1	7	3	3	6	7	7
hsa-miR-7977	-0.79894	0.0636359	0.98568	143	57	153	161	136	83	141	192
hsa-miR-8077	-0.803828	0.150016	0.992536	15	9	15	7	6	16	11	17
hsa-miR-663a	-0.806534	0.212809	0.992536	7	3	19	10	11	8	10	14
hsa-miR-4700-5p	-0.807105	0.0925043	0.992536	74	27	75	48	41	25	131	61
hsa-miR-887-3p	-0.807955	0.345309	0.992536	1	6	29	7	4	8	30	15
hsa-miR-143-3p	-0.808851	0.0590336	0.947931	107694	73938	77818	34750	47416	95828	142467	54941
hsa-miR-4657	-0.809728	0.276185	0.992536	5	6	2	8	3	6	5	10
hsa-miR-1281	-0.810625	0.405164	0.992536	3	1	8	2	1	1	5	9
hsa-miR-99a-3p	-0.811044	0.429461	0.992536	11	3	8	3	2	20	0	2
hsa-miR-543	-0.815791	0.113926	0.992536	66	19	22	23	30	54	30	14
hsa-miR-556-3p	-0.819689	0.215778	0.992536	11	4	12	3	4	11	7	10
hsa-miR-6852-3p	-0.820379	0.214422	0.992536	11	3	4	7	3	5	10	9
hsa-miR-4786-5p	-0.829487	0.40576	0.992536	8	0	1	4	5	3	2	2
hsa-miR-6856-5p	-0.832217	0.444982	0.992536	6	2	0	3	3	2	7	0
hsa-miR-6814-5p	-0.836109	0.406495	0.992536	7	1	2	3	0	1	6	7
hsa-miR-676-3p	-0.837973	0.412674	0.992536	10	0	6	7	2	0	20	5
hsa-miR-4706	-0.84235	0.0913275	0.992536	18	6	12	17	13	11	16	18
hsa-miR-216a-3p	-0.844087	0.406547	0.992536	4	1	2	4	7	2	1	1
hsa-miR-487a-5p	-0.855261	0.278183	0.992536	11	6	3	2	4	12	3	4
hsa-miR-501-5p	-0.858058	0.437233	0.992536	0	5	21	6	4	0	20	20
hsa-miR-6790-3p	-0.858219	0.251682	0.992536	9	6	5	5	0	9	13	8
hsa-miR-511-3p	-0.858561	0.343129	0.992536	4	2	3	2	1	3	7	2
hsa-miR-7846-3p	-0.863084	0.231974	0.992536	6	2	5	9	7	2	8	8
hsa-miR-632	-0.865711	0.370231	0.992536	1	2	3	4	1	5	2	4
hsa-miR-4755-3p	-0.873868	0.218851	0.992536	5	5	3	6	4	3	9	7
hsa-miR-944	-0.875121	0.270183	0.992536	4	3	8	2	3	3	5	9
hsa-miR-6723-5p	-0.875461	0.182043	0.992536	33	11	11	35	3	23	33	45
hsa-miR-3173-5p	-0.880419	0.234494	0.992536	5	6	5	2	7	5	5	4
hsa-miR-378a-5p	-0.88364	0.0198301	0.930294	100	42	89	52	50	91	131	59
hsa-miR-3611	-0.891751	0.0439848	0.943954	28	15	17	24	29	22	29	16
hsa-miR-4485-5p	-0.896462	0.373964	0.992536	6	1	2	1	4	2	1	3
hsa-miR-8058	-0.903245	0.321028	0.992536	3	2	7	7	1	3	3	16
hsa-miR-4279	-0.910743	0.279018	0.992536	2	3	3	4	3	2	5	5
hsa-miR-3141	-0.917407	0.253381	0.992536	7	3	3	7	2	1	13	9
hsa-miR-4685-3p	-0.920716	0.132784	0.992536	9	4	12	7	8	4	16	11
hsa-miR-6846-5p	-0.930076	0.485608	0.992536	7	0	3	0	0	1	2	7
hsa-miR-3591-3p	-0.932101	1	1	959871	81439	41414	83562	22394	896266	27817	24463
hsa-miR-122-5p	-0.932331	1	1	960104	81097	40823	83874	22172	896249	27828	24153
hsa-miR-4639-5p	-0.935966	0.377855	0.992536	3	1	1	4	6	1	2	1
hsa-miR-1262	-0.937077	0.111168	0.992536	15	7	5	5	10	6	13	8
hsa-miR-500a-5p	-0.939088	0.297152	0.992536	3	2	5	8	3	0	12	9
hsa-miR-222-5p	-0.944759	0.155491	0.992536	18	4	4	4	3	9	10	11
hsa-miR-127-5p	-0.948671	0.319456	0.992536	4	1	5	1	1	6	4	2
hsa-miR-4753-5p	-0.948967	0.413817	0.992536	1	6	0	2	4	6	1	1
hsa-miR-585-3p	-0.95199	0.399471	0.992536	2	0	5	4	0	4	10	1
hsa-miR-1292-3p	-0.952849	0.0833443	0.992536	25	24	50	43	21	30	46	87
hsa-miR-1911-3p	-0.953286	0.434972	0.992536	0	0	2	5	1	3	2	3
hsa-miR-637	-0.97093	0.68609	0.992536	5	5	0	2	0	0	0	15
hsa-miR-6503-5p	-0.976781	0.437125	0.992536	2	2	2	0	2	1	5	0
hsa-miR-548ay-3p	-0.983542	0.289312	0.992536	4	1	2	4	2	2	2	7
hsa-miR-1287-3p	-0.987906	0.447818	0.992536	0	2	1	3	5	0	2	1
hsa-miR-1343-5p	-0.996537	0.166644	0.992536	2	7	10	6	10	10	10	4
hsa-miR-125a-5p	-1.002	0.0258681	0.943954	347	101	308	232	117	217	573	371
hsa-miR-605-5p	-1.01078	0.531459	0.992536	2	0	4	0	0	1	0	6
hsa-miR-4728-3p	-1.01177	0.537779	0.992536	6	0	0	0	0	2	3	1
hsa-miR-10b-5p	-1.01392	0.0546367	0.943954	126	47	184	92	47	95	307	166
hsa-miR-204-5p	-1.02343	0.109601	0.992536	38	7	20	18	5	50	18	23
hsa-miR-200b-5p	-1.03341	0.24877	0.992536	32	11	168	14	13	18	216	95
hsa-miR-6716-3p	-1.04098	0.298496	0.992536	3	3	4	0	3	1	8	2
hsa-miR-6499-5p	-1.04541	0.239482	0.992536	4	4	2	1	3	4	2	5
hsa-miR-4713-3p	-1.04821	0.520247	0.992536	1	2	0	3	0	8	0	0
hsa-miR-129-5p	-1.05667	0.0572664	0.943954	27	11	10	21	9	19	54	13
hsa-miR-6717-5p	-1.05987	0.155119	0.992536	5	5	1	9	3	6	11	8
hsa-miR-873-5p	-1.07582	0.0238279	0.943954	46	25	38	28	28	24	46	83
hsa-miR-548w	-1.08651	0.223362	0.992536	6	3	2	1	4	6	4	1
hsa-miR-200c-3p	-1.09255	0.215814	0.992536	899	434	5313	529	500	516	8426	2362
hsa-miR-30c-2-3p	-1.09507	0.0567017	0.943954	90	18	47	30	17	112	66	32
hsa-miR-1972	-1.10226	0.155523	0.992536	8	2	2	9	2	8	5	12
hsa-miR-1909-3p	-1.10249	0.249093	0.992536	1	1	4	3	3	2	6	2
hsa-miR-194-5p	-1.10302	0.10778	0.992536	12673	2030	7799	2230	994	11478	16034	3555
hsa-miR-196a-5p	-1.10783	0.151922	0.992536	166	42	407	171	48	55	560	510
hsa-miR-3677-3p	-1.11515	0.415757	0.992536	0	1	2	2	1	5	0	1
hsa-miR-7107-5p	-1.12176	0.0475103	0.943954	18	12	8	27	27	20	13	26
hsa-miR-4724-3p	-1.13064	0.551201	0.992536	0	0	4	0	0	0	6	1
hsa-miR-4634	-1.13819	0.024082	0.943954	62	21	63	72	47	44	182	52
hsa-miR-135b-3p	-1.14495	0.321977	0.992536	4	1	8	0	1	0	9	9
hsa-miR-194-3p	-1.15622	0.0967803	0.992536	162	20	168	46	18	151	303	90
hsa-miR-4796-3p	-1.16393	0.375553	0.992536	11	0	0	2	0	2	2	10
hsa-miR-5100	-1.17135	0.0130895	0.930294	42	21	76	52	67	39	99	74
hsa-miR-4484	-1.17165	0.214785	0.992536	1	1	2	7	2	2	7	6
hsa-miR-4478	-1.17171	0.295813	0.992536	1	1	2	6	2	0	13	2
hsa-miR-767-5p	-1.17452	0.303762	0.992536	9	1	3	1	0	1	2	14
hsa-miR-548ar-3p	-1.18157	0.0890468	0.992536	27	12	15	44	52	42	36	4
hsa-miR-4686	-1.1931	0.662371	0.992536	21	1	0	0	1	19	0	0
hsa-miR-3125	-1.19963	0.227551	0.992536	3	2	1	4	2	9	2	1
hsa-miR-6823-3p	-1.20377	0.350367	0.992536	1	2	1	2	0	3	0	6
hsa-miR-4665-3p	-1.22222	0.0193467	0.930294	44	12	35	12	23	27	29	61
hsa-miR-4771	-1.22259	0.0709453	0.992536	18	4	8	18	3	15	16	34
hsa-miR-143-5p	-1.22629	0.0310756	0.943954	166	120	383	122	90	412	566	216
hsa-miR-455-5p	-1.22924	0.170814	0.992536	788	44	139	43	26	784	186	106
hsa-miR-4707-5p	-1.23171	0.0767397	0.992536	12	1	8	6	7	3	20	9
hsa-miR-548ax	-1.23285	0.184008	0.992536	4	2	6	0	3	8	3	3
hsa-miR-4528	-1.23335	0.25514	0.992536	7	0	4	1	0	8	6	2
hsa-miR-149-5p	-1.23788	0.0820739	0.992536	14	1	4	13	4	7	24	12
hsa-miR-517-5p	-1.24081	0.426482	0.992536	1	1	0	2	0	5	1	0
hsa-miR-200a-5p	-1.24869	0.0847907	0.992536	281	93	424	143	71	88	1210	267
hsa-miR-4507	-1.26573	0.217077	0.992536	1	1	5	1	1	2	5	5
hsa-miR-4499	-1.27335	0.28038	0.992536	3	0	3	2	3	0	1	7
hsa-miR-550b-2-5p	-1.27806	0.112069	0.992536	11	1	6	1	4	10	4	7
hsa-miR-6511a-5p	-1.28321	0.209796	0.992536	8	1	0	2	3	2	2	7
hsa-miR-1269b	-1.30413	1	1	7	2	10	49	4	5	9	91
hsa-miR-548aj-5p	-1.30603	0.126318	0.992536	10	1	2	2	1	7	8	5
hsa-miR-214-3p	-1.31139	0.0288307	0.943954	18	9	21	20	5	20	62	30
hsa-miR-548v	-1.33417	0.183334	0.992536	5	1	3	0	4	1	4	4
hsa-miR-6765-3p	-1.33722	0.0189192	0.930294	43	25	32	85	108	37	49	90
hsa-miR-215-5p	-1.34137	1	1	4591	1826	6368	3398	1113	2694	25735	1674
hsa-miR-4741	-1.35202	0.242599	0.992536	3	0	1	3	3	0	6	2
hsa-miR-4642	-1.35281	0.125402	0.992536	8	4	5	3	1	1	26	8
hsa-miR-4461	-1.37858	0.071007	0.992536	8	2	7	5	3	2	13	18
hsa-miR-192-5p	-1.38264	0.0452168	0.943954	125152	19627	80997	32182	10460	160688	189644	45450
hsa-miR-3144-3p	-1.38994	0.243106	0.992536	1	0	2	4	2	5	0	4
hsa-miR-6510-5p	-1.40179	0.160536	0.992536	2	0	5	2	1	3	4	7
hsa-miR-708-5p	-1.4055	0.114083	0.992536	5	3	11	0	4	2	16	12
hsa-miR-4709-5p	-1.41322	0.0331196	0.943954	18	2	4	4	12	8	15	6
hsa-miR-3133	-1.43181	0.119266	0.992536	2	2	3	1	2	4	5	3
hsa-miR-4736	-1.43509	0.106147	0.992536	5	5	1	4	1	5	4	16
hsa-miR-3653-5p	-1.43562	0.051683	0.943954	7	5	2	2	3	5	13	7
hsa-miR-6817-5p	-1.44577	0.286875	0.992536	0	1	2	2	1	1	0	7
hsa-miR-200b-3p	-1.46204	0.0865547	0.992536	2995	1285	13231	1660	1255	2073	27542	9209
hsa-miR-100-5p	-1.46461	0.0602848	0.954072	219	23	35	64	19	318	117	32
hsa-miR-122-3p	-1.50942	1	1	206	5	6	2	1	227	4	16
hsa-miR-376a-5p	-1.51258	0.131247	0.992536	4	1	3	0	1	3	6	4
hsa-miR-6738-3p	-1.5205	0.179519	0.992536	2	0	5	0	2	3	2	5
hsa-miR-885-5p	-1.53337	1	1	74	13	43	9	9	174	20	9
hsa-miR-125b-5p	-1.54037	0.0200585	0.930294	624	72	142	87	66	634	538	194
hsa-miR-4327	-1.54043	0.146802	0.992536	5	2	0	3	2	0	7	9
hsa-miR-6764-5p	-1.5447	0.276105	0.992536	5	1	0	0	1	6	2	0
hsa-miR-1911-5p	-1.58349	0.0187343	0.930294	24	5	9	14	4	15	22	51
hsa-miR-6068	-1.59035	0.0877669	0.992536	4	2	1	2	1	2	6	8
hsa-miR-3139	-1.59434	0.181154	0.992536	3	1	4	0	1	0	4	10
hsa-miR-3612	-1.61896	0.215657	0.992536	1	2	7	0	2	1	0	17
hsa-miR-105-5p	-1.62125	0.164049	0.992536	3	0	5	2	0	1	4	14
hsa-miR-4770	-1.62756	0.0381692	0.943954	10	2	10	3	2	19	24	4
hsa-miR-6766-5p	-1.6352	0.146223	0.992536	6	0	0	2	3	1	3	6
hsa-miR-200a-3p	-1.6538	0.0615504	0.963627	503	177	2334	521	239	389	6902	1203
hsa-miR-8074	-1.66184	0.0824425	0.992536	5	2	0	2	2	2	5	8
hsa-miR-1293	-1.68331	0.181357	0.992536	4	0	1	4	0	0	8	10
hsa-miR-455-3p	-1.75305	0.223854	0.992536	215	3	69	8	4	373	21	53
hsa-miR-3180-3p	-1.7554	1	1	6	3	6	27	1	1	2	87
hsa-miR-549a	-1.75934	0.124085	0.992536	2	5	1	2	0	1	4	19
hsa-miR-3660	-1.76164	0.0487823	0.943954	7	3	0	1	6	7	5	3
hsa-miR-551b-5p	-1.7677	0.174851	0.992536	2	2	0	0	1	2	5	1
hsa-miR-200c-5p	-1.77299	0.197749	0.992536	1	0	5	0	0	1	11	3
hsa-miR-4308	-1.80549	0.0567707	0.943954	5	2	1	1	1	2	11	6
hsa-miR-135b-5p	-1.80755	0.0495765	0.943954	8	3	28	7	2	4	43	62
hsa-miR-3142	-1.86259	0.116016	0.992536	1	1	4	0	2	0	7	6
hsa-miR-3591-5p	-1.86738	1	1	173	4	9	1	0	245	11	20
hsa-miR-4517	-1.87785	0.0234713	0.943954	4	5	0	3	4	4	9	12
hsa-miR-3120-5p	-1.88389	0.00272041	0.516429	21	9	18	7	5	32	74	25
hsa-miR-1257	-1.92462	0.0659066	0.992536	3	0	13	5	6	1	6	37
hsa-miR-145-5p	-1.92678	0.000475735	0.138534	698	526	1334	465	732	3297	2650	1002
hsa-miR-3609	-1.94568	0.190586	0.992536	1	0	1	1	0	1	1	5
hsa-miR-519c-3p	-1.94872	0.0445229	0.943954	3	2	1	3	0	3	9	11
hsa-miR-7974	-1.97344	0.0396421	0.943954	0	3	6	5	1	4	16	20
hsa-miR-563	-1.97485	0.0854173	0.992536	4	1	1	0	1	8	2	2
hsa-miR-1199-3p	-2.00624	0.0413662	0.943954	4	1	3	3	2	0	10	16
hsa-miR-3180	-2.01276	1	1	3	1	3	24	1	2	3	75
hsa-miR-5701	-2.01774	0.0210423	0.930294	9	1	22	19	6	5	91	47
hsa-miR-4684-3p	-2.08199	0.0518431	0.943954	2	2	1	2	1	1	3	14
hsa-miR-1248	-2.11909	0.00767017	0.784709	6	2	6	7	1	30	18	9
hsa-miR-4696	-2.12609	0.137293	0.992536	3	1	0	0	1	0	8	2
hsa-miR-34c-3p	-2.14277	0.114631	0.992536	1	1	2	0	7	2	0	1
hsa-miR-4685-5p	-2.14379	0.0280007	0.943954	3	0	2	2	1	3	7	8
hsa-miR-5088-3p	-2.20979	0.195494	0.992536	2	0	0	1	1	0	8	0
hsa-miR-215-3p	-2.23641	0.0388843	0.943954	3	1	1	7	1	4	37	1
hsa-miR-552-3p	-2.26919	0.00410788	0.576775	38	14	55	49	9	27	214	264
hsa-miR-1231	-2.30292	0.231979	0.992536	0	0	0	2	1	0	7	0
hsa-miR-5571-3p	-2.3373	0.0690964	0.992536	4	1	1	0	1	2	17	0
hsa-miR-552-5p	-2.40029	0.00808423	0.784709	3	9	22	4	3	9	49	87
hsa-miR-6832-3p	-2.42059	0.0417124	0.943954	2	0	0	2	3	1	6	3
hsa-miR-642a-5p	-2.46181	0.117028	0.992536	1	0	2	0	0	0	6	5
hsa-miR-3607-3p	-2.69103	0.00578905	0.702405	4	1	16	6	5	2	107	21
hsa-miR-514a-5p	-2.88832	0.327963	0.992536	4	0	0	0	0	11	0	1
hsa-miR-6715b-5p	-3.20626	1	1	6	0	3	1	0	44	1	0
hsa-miR-6511b-5p	-3.27567	0.0101076	0.919789	1	1	1	2	3	25	0	1
hsa-miR-6715a-3p	-3.44928	1	1	7	0	4	1	0	63	1	0
hsa-miR-592	-3.70629	0.00743867	0.784709	0	0	1	2	2	17	0	5
hsa-miR-3937	-5.38028	1	1	5	0	1	1	1	0	1	140

## Sheet: Supplemental Table S2
AccID	log2FC	Pvalue	FDR	Style	Pcos1	Pcos2	Pcos3	Pcos4	NC1	NC2	NC3	NC4
hsa-miR-497-3p	4.39487	0.00100422	0.24369	up	13	3	6	5	0	0	0	0
hsa-miR-8089	4.07846	3.43815e-08	5.00594e-05	up	483	64	22	75	4	4	6	5
hsa-miR-6505-3p	3.74403	0.0043575	0.576775	up	9	2	8	8	0	0	0	1
hsa-miR-4292	3.57594	0.0188565	0.930294	up	6	1	5	3	0	0	0	0
hsa-miR-4418	3.50417	0.00283752	0.516429	up	12	2	44	8	0	0	3	1
hsa-miR-4649-5p	3.35777	0.0152671	0.930294	up	14	2	3	4	0	1	0	0
hsa-miR-6824-5p	3.31624	0.0334033	0.943954	up	5	3	2	2	0	0	0	0
hsa-miR-6781-5p	3.23401	0.021085	0.930294	up	4	2	4	8	0	0	1	0
hsa-miR-4300	3.1561	8.12073e-05	0.0394126	up	23	24	50	12	1	3	1	3
hsa-miR-4687-5p	3.12725	0.0253315	0.943954	up	3	4	4	5	0	0	1	0
hsa-miR-1183	3.06037	0.00415643	0.576775	up	23	4	9	8	1	0	1	1
hsa-miR-8069	2.77498	0.0123136	0.930294	up	10	6	11	5	0	0	1	2
hsa-miR-3686	2.40151	0.0306854	0.943954	up	13	7	13	4	4	0	0	0
hsa-miR-6782-5p	2.3805	0.0152523	0.930294	up	16	5	9	6	1	1	0	2
hsa-miR-4636	2.2513	0.0321201	0.943954	up	21	7	3	3	1	1	1	1
hsa-miR-6740-5p	2.09393	0.0435839	0.943954	up	11	7	3	6	1	1	2	0
hsa-miR-6134	2.07127	0.0339506	0.943954	up	22	8	8	5	0	0	1	5
hsa-miR-1299	1.99191	0.000294608	0.107237	up	1184	73	466	529	74	78	112	45
hsa-miR-6818-5p	1.83744	1.36875e-05	0.00996448	up	631	185	201	168	28	30	71	65
hsa-miR-7113-5p	1.71193	0.0295243	0.943954	up	26	12	5	64	2	8	6	5
hsa-miR-4306	1.46459	0.01476	0.930294	up	25	11	16	15	3	3	5	4
hsa-miR-5695	1.4628	0.0188089	0.930294	up	68	19	12	19	5	2	12	6
hsa-miR-1909-5p	1.42287	0.011716	0.930294	up	326	139	71	361	68	57	52	21
hsa-miR-4504	1.40751	0.0326723	0.943954	up	58	38	15	11	5	3	16	6
hsa-miR-31-5p	1.39874	0.0374898	0.943954	up	69	37	174	28	7	9	45	21
hsa-miR-1229-5p	1.33559	0.0452904	0.943954	up	59	25	9	10	7	4	5	7
hsa-miR-4690-3p	1.23204	0.0431761	0.943954	up	31	11	52	23	7	8	14	3
hsa-miR-4665-3p	-1.22222	0.0193467	0.930294	down	44	12	35	12	23	27	29	61
hsa-miR-143-5p	-1.22629	0.0310756	0.943954	down	166	120	383	122	90	412	566	216
hsa-miR-214-3p	-1.31139	0.0288307	0.943954	down	18	9	21	20	5	20	62	30
hsa-miR-6765-3p	-1.33722	0.0189192	0.930294	down	43	25	32	85	108	37	49	90
hsa-miR-192-5p	-1.38264	0.0452168	0.943954	down	125152	19627	80997	32182	10460	160688	189644	45450
hsa-miR-4709-5p	-1.41322	0.0331196	0.943954	down	18	2	4	4	12	8	15	6
hsa-miR-125b-5p	-1.54037	0.0200585	0.930294	down	624	72	142	87	66	634	538	194
hsa-miR-1911-5p	-1.58349	0.0187343	0.930294	down	24	5	9	14	4	15	22	51
hsa-miR-4770	-1.62756	0.0381692	0.943954	down	10	2	10	3	2	19	24	4
hsa-miR-3660	-1.76164	0.0487823	0.943954	down	7	3	0	1	6	7	5	3
hsa-miR-135b-5p	-1.80755	0.0495765	0.943954	down	8	3	28	7	2	4	43	62
hsa-miR-4517	-1.87785	0.0234713	0.943954	down	4	5	0	3	4	4	9	12
hsa-miR-3120-5p	-1.88389	0.00272041	0.516429	down	21	9	18	7	5	32	74	25
hsa-miR-145-5p	-1.92678	0.000475735	0.138534	down	698	526	1334	465	732	3297	2650	1002
hsa-miR-519c-3p	-1.94872	0.0445229	0.943954	down	3	2	1	3	0	3	9	11
hsa-miR-7974	-1.97344	0.0396421	0.943954	down	0	3	6	5	1	4	16	20
hsa-miR-1199-3p	-2.00624	0.0413662	0.943954	down	4	1	3	3	2	0	10	16
hsa-miR-5701	-2.01774	0.0210423	0.930294	down	9	1	22	19	6	5	91	47
hsa-miR-1248	-2.11909	0.00767017	0.784709	down	6	2	6	7	1	30	18	9
hsa-miR-4685-5p	-2.14379	0.0280007	0.943954	down	3	0	2	2	1	3	7	8
hsa-miR-215-3p	-2.23641	0.0388843	0.943954	down	3	1	1	7	1	4	37	1
hsa-miR-552-3p	-2.26919	0.00410788	0.576775	down	38	14	55	49	9	27	214	264
hsa-miR-552-5p	-2.40029	0.00808423	0.784709	down	3	9	22	4	3	9	49	87
hsa-miR-6832-3p	-2.42059	0.0417124	0.943954	down	2	0	0	2	3	1	6	3
hsa-miR-3607-3p	-2.69103	0.00578905	0.702405	down	4	1	16	6	5	2	107	21
hsa-miR-6511b-5p	-3.27567	0.0101076	0.919789	down	1	1	1	2	3	25	0	1
hsa-miR-592	-3.70629	0.00743867	0.784709	down	0	0	1	2	2	17	0	5

## Sheet: Supplemental Table S3
QueryID	SubjectID	OverlapInfo	Energy_Miranda	Score_Miranda	StartSubject_Miranda	Endsubject_Miranda	Energy_RNAhybrid	P-Value_RNAhybrid	StartSubject_RNAhybrid	Endsubject_RNAhybrid
hsa-miR-4636	DMRT2	Miranda_RNAhybrid	-22.27	151	941	962	-25.9	0.538406	939	962
hsa-miR-4636	TPPP	Miranda_RNAhybrid	-20.81	154	3155	3177	-25	0.969151	2296	2314
hsa-miR-4636	TBCA	Miranda_RNAhybrid	-21.16	152	585	606	-27.2	0.365576	578	606
hsa-miR-4636	ZNF124	Miranda_RNAhybrid	-20.57	150	1214	1239	-25.1	0.706365	1201	1240
hsa-miR-6505-3p	PHF19	Miranda_RNAhybrid	-22.54	159	690	710	-25.6	0.677799	689	710
hsa-miR-6505-3p	SURF4	Miranda_RNAhybrid	-21.35	166	691	711	-26.4	0.498049	693	711
hsa-miR-6505-3p	SLC26A2	Miranda_RNAhybrid	-22.6	165	986	1006	-26.5	0.849406	989	1007
hsa-miR-6505-3p	LDLRAD2	Miranda_RNAhybrid	-20.25	156	2415	2435	-26	0.717015	501	519
hsa-miR-6505-3p	BMP8B	Miranda_RNAhybrid	-21.61	150	284	306	-26.1	0.574713	2094	2110
hsa-miR-6505-3p	PRPF38A	Miranda_RNAhybrid	-23.42	169	1097	1117	-26.8	0.354482	1100	1118
hsa-miR-6505-3p	OTUD7B	Miranda_RNAhybrid	-22.25	162	336	357	-26.1	0.759412	331	357
hsa-miR-6505-3p	SHC1	Miranda_RNAhybrid	-21.38	163	1237	1257	-25.4	0.538677	1242	1258
hsa-miR-6505-3p	C10orf55	Miranda_RNAhybrid	-20.06	155	161	181	-26.3	0.44529	1448	1466
hsa-miR-6505-3p	FAS	Miranda_RNAhybrid	-20.04	155	2079	2102	-26.5	0.579299	2074	2102
hsa-miR-6505-3p	SH3PXD2A	Miranda_RNAhybrid	-20.51	155	4512	4531	-25.2	0.987809	4716	4734
hsa-miR-6505-3p	GPR26	Miranda_RNAhybrid	-21.92	169	6255	6276	-25.6	0.986875	6257	6276
hsa-miR-6505-3p	TRIB2	Miranda_RNAhybrid	-20.02	152	702	723	-30.3	0.100376	1813	1831
hsa-miR-592	FOCAD	Miranda_RNAhybrid	-20.41	163	133	155	-25.1	0.108991	132	155
hsa-miR-592	CTSV	Miranda_RNAhybrid	-21.03	159	2924	2947	-25.4	0.838489	2923	2948
hsa-miR-592	FKTN	Miranda_RNAhybrid	-20.56	159	2073	2095	-25.2	0.968664	2072	2096
hsa-miR-592	SEMA5A	Miranda_RNAhybrid	-21.74	166	4799	4820	-26.3	0.942541	4806	4821
hsa-miR-592	C1orf95	Miranda_RNAhybrid	-22.52	157	2184	2209	-27.1	0.848468	2188	2210
hsa-miR-592	KIF5B	Miranda_RNAhybrid	-22.47	179	2143	2166	-26.7	0.538771	2144	2166
hsa-miR-7107-5p	GNE	Miranda_RNAhybrid	-27.23	157	379	399	-31.6	0.283027	2061	2083
hsa-miR-7107-5p	TJP2	Miranda_RNAhybrid	-30.28	158	47	67	-31.1	0.080936	49	67
hsa-miR-7107-5p	C9orf41	Miranda_RNAhybrid	-32.38	160	532	552	-36.5	0.043747	530	553
hsa-miR-7107-5p	NTRK2	Miranda_RNAhybrid	-21.28	152	5251	5272	-36.3	0.109986	20	52
hsa-miR-7107-5p	ISCA1	Miranda_RNAhybrid	-28.78	152	748	770	-32.5	0.097604	742	771
hsa-miR-7107-5p	C9orf47	Miranda_RNAhybrid	-32.62	161	1888	1909	-33.6	0.2035	1888	1910
hsa-miR-7107-5p	NUTM2G	Miranda_RNAhybrid	-24.75	150	587	608	-31.4	0.279847	575	609
hsa-miR-7107-5p	CORO2A	Miranda_RNAhybrid	-22.4	150	2756	2777	-28.4	0.778637	2729	2778
hsa-miR-7107-5p	PRPF4	Miranda_RNAhybrid	-29.84	158	1979	2003	-32	0.179069	1980	2004
hsa-miR-7107-5p	PRDM12	Miranda_RNAhybrid	-27.66	150	296	317	-35.4	0.025375	284	318
hsa-miR-7107-5p	ABL1	Miranda_RNAhybrid	-35.12	158	1330	1351	-38.1	0.015003	1316	1352
hsa-miR-7107-5p	PRRC2B	Miranda_RNAhybrid	-24.57	153	4167	4188	-36.3	0.081707	1552	1576
hsa-miR-7107-5p	GFI1B	Miranda_RNAhybrid	-28.68	159	538	560	-31.6	0.045862	538	560
hsa-miR-7107-5p	FCN2	Miranda_RNAhybrid	-22.49	150	1	10	-26.5	0.147145	1	11
hsa-miR-7107-5p	GPSM1	Miranda_RNAhybrid	-33.28	164	218	239	-40.4	0.003317	214	240
hsa-miR-7107-5p	PMPCA	Miranda_RNAhybrid	-25	157	512	533	-34.6	0.017131	482	514
hsa-miR-7107-5p	TMEM141	Miranda_RNAhybrid	-36.03	166	58	81	-39.8	0.000642	54	82
hsa-miR-7107-5p	LCNL1	Miranda_RNAhybrid	-25.64	153	270	291	-28.9	0.176978	234	265
hsa-miR-7107-5p	TOR4A	Miranda_RNAhybrid	-36.19	155	1123	1144	-35.2	0.069902	1124	1144
hsa-miR-7107-5p	ENTPD8	Miranda_RNAhybrid	-28.86	158	235	255	-34.5	0.009569	194	230
hsa-miR-7107-5p	AHRR	Miranda_RNAhybrid	-38.01	164	65	86	-36.1	0.067739	65	87
hsa-miR-7107-5p	PAPD7	Miranda_RNAhybrid	-29.82	155	792	813	-36.8	0.027242	789	813
hsa-miR-7107-5p	ADCY2	Miranda_RNAhybrid	-21.93	150	2913	2934	-31.3	0.339571	2318	2346
hsa-miR-7107-5p	PDZD2	Miranda_RNAhybrid	-39.29	162	188	214	-40	0.011448	188	215
hsa-miR-7107-5p	HCN1	Miranda_RNAhybrid	-24.63	151	5726	5748	-29.3	0.850152	1107	1135
hsa-miR-7107-5p	KIAA0825	Miranda_RNAhybrid	-33.31	162	2592	2615	-33.6	0.15294	2594	2616
hsa-miR-7107-5p	LNPEP	Miranda_RNAhybrid	-26.87	157	368	389	-31.1	0.087253	360	389
hsa-miR-7107-5p	2018-03-03	Miranda_RNAhybrid	-29.19	151	2096	2117	-31.8	0.264334	1707	1730
hsa-miR-7107-5p	2018-09-08	Miranda_RNAhybrid	-33.47	157	2509	2531	-38.7	0.019073	143	175
hsa-miR-7107-5p	CTNNA1	Miranda_RNAhybrid	-28.89	158	1	15	-30.8	0.108528	1	16
hsa-miR-7107-5p	DNAJC18	Miranda_RNAhybrid	-27.79	162	2943	2964	-34.4	0.146223	2938	2965
hsa-miR-7107-5p	NDST1	Miranda_RNAhybrid	-38.09	169	4336	4357	-37.7	0.056614	4337	4357
hsa-miR-7107-5p	ANXA6	Miranda_RNAhybrid	-34.2	160	467	490	-32.7	0.034509	470	490
hsa-miR-7107-5p	CCDC69	Miranda_RNAhybrid	-25.94	154	1104	1125	-29.7	0.436223	1852	1891
hsa-miR-7107-5p	MGAT4B	Miranda_RNAhybrid	-32.88	152	247	270	-34.4	0.007003	246	270
hsa-miR-7107-5p	TNFRSF18	Miranda_RNAhybrid	-34.24	165	42	63	-39.2	0.000399	36	63
hsa-miR-7107-5p	UBE2J2	Miranda_RNAhybrid	-34.65	162	684	705	-35.5	0.022081	684	706
hsa-miR-7107-5p	VWA1	Miranda_RNAhybrid	-28.55	156	2349	2369	-34.8	0.096496	2345	2369
hsa-miR-7107-5p	KCNAB2	Miranda_RNAhybrid	-32.03	161	1011	1032	-34.8	0.079171	1011	1032
hsa-miR-7107-5p	HES2	Miranda_RNAhybrid	-31.08	153	104	126	-32.7	0.242076	103	127
hsa-miR-7107-5p	RERE	Miranda_RNAhybrid	-30.18	152	1663	1687	-34.8	0.081509	1451	1473
hsa-miR-7107-5p	GPR157	Miranda_RNAhybrid	-29.26	158	940	961	-33.8	0.033437	612	646
hsa-miR-7107-5p	H6PD	Miranda_RNAhybrid	-27.08	157	4988	5009	-32	0.482854	816	841
hsa-miR-7107-5p	CTNNBIP1	Miranda_RNAhybrid	-29.76	151	965	988	-35.8	0.049364	2141	2168
hsa-miR-7107-5p	PTCHD2	Miranda_RNAhybrid	-30	156	186	209	-31	0.0936	187	210
hsa-miR-7107-5p	MTHFR	Miranda_RNAhybrid	-34.19	163	3180	3202	-39.1	0.034477	3204	3234
hsa-miR-7107-5p	EFHD2	Miranda_RNAhybrid	-38.27	168	388	410	-41.8	0.002392	386	410
hsa-miR-7107-5p	FAM43B	Miranda_RNAhybrid	-26.55	153	643	665	-27.7	0.400662	650	665
hsa-miR-7107-5p	ALPL	Miranda_RNAhybrid	-29.56	150	568	589	-34.6	0.015571	561	590
hsa-miR-7107-5p	ZBTB40	Miranda_RNAhybrid	-35.25	170	974	998	-39.3	0.030498	971	998
hsa-miR-7107-5p	PHACTR4	Miranda_RNAhybrid	-31.64	166	2615	2636	-34	0.162676	2612	2637
hsa-miR-7107-5p	ZCCHC17	Miranda_RNAhybrid	-33.08	158	1358	1383	-34.7	0.041274	1358	1383
hsa-miR-7107-5p	TRIM62	Miranda_RNAhybrid	-38.23	170	650	670	-39.9	0.006068	650	671
hsa-miR-7107-5p	DLGAP3	Miranda_RNAhybrid	-32.33	159	299	322	-34.9	0.010409	349	378
hsa-miR-7107-5p	NCDN	Miranda_RNAhybrid	-29.41	162	230	251	-32.9	0.056588	233	252
hsa-miR-7107-5p	EPHA10	Miranda_RNAhybrid	-28.42	159	673	694	-32.4	0.175215	632	658
hsa-miR-7107-5p	UTP11L	Miranda_RNAhybrid	-33.31	162	794	817	-34.7	0.029315	453	480
hsa-miR-7107-5p	BMP8A	Miranda_RNAhybrid	-27.73	155	3097	3118	-33.7	0.192738	2932	2956
hsa-miR-7107-5p	BMP8B	Miranda_RNAhybrid	-36.56	155	74	95	-37.7	0.020126	66	96
hsa-miR-7107-5p	LEPRE1	Miranda_RNAhybrid	-31.11	162	445	466	-33.3	0.017871	442	466
hsa-miR-7107-5p	ATP6V0B	Miranda_RNAhybrid	-25.94	152	738	759	-30.6	0.107621	704	760
hsa-miR-7107-5p	BTF3L4	Miranda_RNAhybrid	-30.2	162	2047	2068	-32	0.327902	2045	2069
hsa-miR-7107-5p	CYB561D1	Miranda_RNAhybrid	-33.13	162	2715	2735	-40	0.02326	993	1031
hsa-miR-7107-5p	SLC6A17	Miranda_RNAhybrid	-21.82	153	3563	3584	-35.6	0.091246	2444	2494
hsa-miR-7107-5p	APH1A	Miranda_RNAhybrid	-43.03	174	312	332	-45.3	0.000284	311	333
hsa-miR-7107-5p	TDRKH	Miranda_RNAhybrid	-23.87	153	437	458	-28.9	0.240999	412	458
hsa-miR-7107-5p	RORC	Miranda_RNAhybrid	-26.81	158	144	164	-28.9	0.339179	141	165
hsa-miR-7107-5p	NPR1	Miranda_RNAhybrid	-33.76	158	254	278	-34.2	0.011878	251	279
hsa-miR-7107-5p	PAQR6	Miranda_RNAhybrid	-34.38	172	138	159	-36.3	0.003013	130	160
hsa-miR-7107-5p	C1orf106	Miranda_RNAhybrid	-33.7	158	84	104	-37.8	0.018266	60	105
hsa-miR-7107-5p	PIGR	Miranda_RNAhybrid	-29.74	167	1521	1542	-34.1	0.065016	834	854
hsa-miR-7107-5p	ADCK3	Miranda_RNAhybrid	-28.88	153	2	24	-35	0.01416	445	474
hsa-miR-7107-5p	JMJD4	Miranda_RNAhybrid	-26.32	152	757	779	-35.5	0.02107	513	546
hsa-miR-7107-5p	ARF1	Miranda_RNAhybrid	-29.32	152	690	711	-31.8	0.09786	642	678
hsa-miR-7107-5p	GALNT2	Miranda_RNAhybrid	-37.46	173	221	242	-40.7	0.008133	214	243
hsa-miR-7107-5p	IRF2BP2	Miranda_RNAhybrid	-32.86	165	420	441	-34.5	0.098751	420	442
hsa-miR-7107-5p	AKR1E2	Miranda_RNAhybrid	-29.31	153	451	472	-35.8	0.00882	432	473
hsa-miR-7107-5p	KIN	Miranda_RNAhybrid	-33.31	162	4047	4070	-33.6	0.248923	4049	4071
hsa-miR-7107-5p	PRKG1	Miranda_RNAhybrid	-21.97	150	448	469	-29.7	0.657383	424	470
hsa-miR-7107-5p	PCBD1	Miranda_RNAhybrid	-27.85	161	274	295	-30	0.053317	278	295
hsa-miR-7107-5p	ENTPD1	Miranda_RNAhybrid	-33.3	158	6321	6345	-36.8	0.18128	8088	8118
hsa-miR-7107-5p	MORN4	Miranda_RNAhybrid	-25.34	152	1466	1488	-37.5	0.01535	1089	1118
hsa-miR-7107-5p	CALHM3	Miranda_RNAhybrid	-30.44	158	58	79	-32	0.018624	57	79
hsa-miR-7107-5p	NANOS1	Miranda_RNAhybrid	-27.75	159	2225	2246	-31.3	0.380143	2389	2419
hsa-miR-7107-5p	MGMT	Miranda_RNAhybrid	-28.05	158	341	362	-30.9	0.045875	324	362
hsa-miR-7107-5p	UTF1	Miranda_RNAhybrid	-39.15	172	16	36	-41.1	1e-05	13	37
hsa-miR-7107-5p	SPRN	Miranda_RNAhybrid	-32.92	158	650	673	-39.9	0.010489	2223	2257
hsa-miR-497-3p	BNC2	Miranda_RNAhybrid	-24.53	167	8658	8681	-27.5	0.91704	8658	8681
hsa-miR-497-3p	BAG1	Miranda_RNAhybrid	-20.36	154	1922	1943	-25.4	0.842207	1922	1944
hsa-miR-497-3p	CENPP	Miranda_RNAhybrid	-21.21	175	198	220	-26.4	0.573287	199	220
hsa-miR-497-3p	KIAA1958	Miranda_RNAhybrid	-21.35	172	1737	1758	-26.9	0.840995	1727	1758
hsa-miR-497-3p	AKNA	Miranda_RNAhybrid	-26.94	161	2136	2158	-31.5	0.127628	2136	2159
hsa-miR-497-3p	RAB14	Miranda_RNAhybrid	-20.96	151	1342	1360	-25.9	0.828553	1341	1361
hsa-miR-497-3p	TPPP	Miranda_RNAhybrid	-23.36	155	269	296	-25.9	0.938022	272	297
hsa-miR-497-3p	SUB1	Miranda_RNAhybrid	-23.28	157	1065	1090	-25.4	0.866416	1064	1091
hsa-miR-497-3p	CCNO	Miranda_RNAhybrid	-22.33	160	196	217	-29.2	0.007917	189	218
hsa-miR-497-3p	UTP15	Miranda_RNAhybrid	-26.09	164	2114	2135	-25.2	0.909521	2114	2136
hsa-miR-497-3p	C5orf63	Miranda_RNAhybrid	-22.17	155	244	266	-25	0.980724	245	267
hsa-miR-497-3p	CDC42SE2	Miranda_RNAhybrid	-22.71	161	1158	1180	-25.1	0.882119	1162	1181
hsa-miR-497-3p	CCNI2	Miranda_RNAhybrid	-22.62	155	940	961	-25	0.668782	934	962
hsa-miR-497-3p	SPRY4	Miranda_RNAhybrid	-23.75	159	243	264	-26.9	0.736489	245	265
hsa-miR-497-3p	NR3C1	Miranda_RNAhybrid	-20.99	169	129	150	-26.6	0.795283	133	150
hsa-miR-497-3p	SLIT3	Miranda_RNAhybrid	-21.94	167	4373	4394	-26.6	0.848055	4375	4394
hsa-miR-497-3p	NEURL1B	Miranda_RNAhybrid	-20.54	152	1631	1651	-25.8	0.923977	1634	1652
hsa-miR-497-3p	BTNL3	Miranda_RNAhybrid	-27.15	176	751	772	-28.6	0.097558	752	773
hsa-miR-497-3p	KCNAB2	Miranda_RNAhybrid	-20.85	157	75	96	-26.7	0.629225	68	97
hsa-miR-497-3p	SH2D5	Miranda_RNAhybrid	-28.18	165	879	902	-30.6	0.123483	879	903
hsa-miR-497-3p	SFPQ	Miranda_RNAhybrid	-20.86	164	3556	3577	-25.4	0.985264	3555	3577
hsa-miR-497-3p	AGO4	Miranda_RNAhybrid	-21.56	168	815	836	-27.5	0.690837	814	837
hsa-miR-497-3p	PPIE	Miranda_RNAhybrid	-22.57	163	2507	2527	-26.2	0.8028	2500	2528
hsa-miR-497-3p	SSX2IP	Miranda_RNAhybrid	-21.15	159	418	440	-26.2	0.82987	411	441
hsa-miR-497-3p	HS2ST1	Miranda_RNAhybrid	-25.76	166	2075	2096	-33.2	0.128258	2072	2097
hsa-miR-497-3p	SLC30A7	Miranda_RNAhybrid	-20.74	150	2015	2036	-26.3	0.951619	2017	2037
hsa-miR-497-3p	CSF1	Miranda_RNAhybrid	-22.44	157	352	373	-25	0.820736	352	374
hsa-miR-497-3p	HIST2H2BE	Miranda_RNAhybrid	-23.01	162	926	951	-26.7	0.480175	926	951
hsa-miR-497-3p	MCL1	Miranda_RNAhybrid	-22.1	161	2422	2442	-26	0.76777	2424	2443
hsa-miR-497-3p	THEM4	Miranda_RNAhybrid	-23.52	168	1797	1818	-27.8	0.620642	1793	1818
hsa-miR-497-3p	KIRREL	Miranda_RNAhybrid	-20.07	150	4346	4367	-26.1	0.922506	4329	4368
hsa-miR-497-3p	DDR2	Miranda_RNAhybrid	-21.75	164	481	503	-25.1	0.989932	485	503
hsa-miR-497-3p	SELE	Miranda_RNAhybrid	-25.23	168	1728	1749	-27.7	0.354744	1732	1750
hsa-miR-497-3p	CEP350	Miranda_RNAhybrid	-24.42	166	3571	3594	-28.9	0.427622	3573	3595
hsa-miR-497-3p	ZNF648	Miranda_RNAhybrid	-22.64	158	161	184	-27	0.420914	163	184
hsa-miR-497-3p	LAMC1	Miranda_RNAhybrid	-20.69	161	2346	2367	-27.9	0.467775	2342	2368
hsa-miR-497-3p	MYOG	Miranda_RNAhybrid	-20.86	167	665	688	-25.9	0.290256	665	688
hsa-miR-497-3p	RAB7B	Miranda_RNAhybrid	-27.41	178	701	722	-29.5	0.199784	705	722
hsa-miR-497-3p	FAM107B	Miranda_RNAhybrid	-21.48	167	2335	2356	-25	0.878558	2328	2356
hsa-miR-497-3p	ZFAND4	Miranda_RNAhybrid	-21.59	162	547	571	-26	0.337659	549	571
hsa-miR-497-3p	GPR26	Miranda_RNAhybrid	-22.72	164	5374	5395	-28.9	0.753201	5375	5396
hsa-miR-3607-3p	RFX3	Miranda_RNAhybrid	-24.98	173	2349	2368	-27.4	0.684516	2351	2368
hsa-miR-3607-3p	TPRG1L	Miranda_RNAhybrid	-20.65	171	658	676	-27.2	0.206483	1043	1064
hsa-miR-3607-3p	LEPR	Miranda_RNAhybrid	-21.74	170	1415	1434	-27.2	0.31482	1414	1435
hsa-miR-1299	MPDZ	Miranda_RNAhybrid	-22.41	159	799	823	-26.4	0.420367	794	824
hsa-miR-1299	BNC2	Miranda_RNAhybrid	-21.22	168	993	1014	-28.8	0.80742	8862	8906
hsa-miR-1299	FAM154A	Miranda_RNAhybrid	-24.58	152	113	132	-26.5	0.100222	114	133
hsa-miR-1299	BAG1	Miranda_RNAhybrid	-27.52	159	498	523	-31.1	0.156035	497	524
hsa-miR-1299	RGP1	Miranda_RNAhybrid	-24.01	159	1951	1973	-29.3	0.504689	1954	1974
hsa-miR-1299	SHB	Miranda_RNAhybrid	-21.54	159	1592	1614	-30.2	0.314301	1581	1615
hsa-miR-1299	LOC100996643	Miranda_RNAhybrid	-25.86	152	417	436	-29.5	0.23976	418	437
hsa-miR-1299	ISCA1	Miranda_RNAhybrid	-22.32	153	120	141	-26.1	0.534355	11	35
hsa-miR-1299	NINJ1	Miranda_RNAhybrid	-20.49	155	377	398	-27.1	0.181293	374	399
hsa-miR-1299	FANCC	Miranda_RNAhybrid	-22.2	166	839	862	-26.2	0.744762	840	862
hsa-miR-1299	PALM2	Miranda_RNAhybrid	-23.19	172	539	560	-29.4	0.666888	7674	7700
hsa-miR-1299	KIAA0368	Miranda_RNAhybrid	-22.86	167	1141	1162	-25	0.672338	1143	1163
hsa-miR-1299	PTBP3	Miranda_RNAhybrid	-21.52	159	4330	4352	-25.8	0.972677	4331	4353
hsa-miR-1299	TNFSF8	Miranda_RNAhybrid	-22.45	154	1186	1209	-28.3	0.439618	1186	1209
hsa-miR-1299	TOR2A	Miranda_RNAhybrid	-23.72	152	1579	1598	-25.9	0.617788	1580	1599
hsa-miR-1299	SLC27A4	Miranda_RNAhybrid	-20.43	150	157	177	-26.3	0.339985	9	44
hsa-miR-1299	C9orf114	Miranda_RNAhybrid	-23.15	151	1031	1052	-27	0.67592	1029	1053
hsa-miR-1299	C9orf78	Miranda_RNAhybrid	-21.26	159	416	437	-28.2	0.134696	719	747
hsa-miR-1299	GPR107	Miranda_RNAhybrid	-24.7	157	1143	1162	-28.5	0.631362	1142	1163
hsa-miR-1299	RAPGEF1	Miranda_RNAhybrid	-28.68	154	1168	1194	-30.9	0.167461	1168	1195
hsa-miR-1299	NACC2	Miranda_RNAhybrid	-21.81	154	2810	2832	-30.9	0.30728	3825	3847
hsa-miR-1299	MGC50722	Miranda_RNAhybrid	-20.63	154	59	79	-26.7	0.107593	54	80
hsa-miR-1299	SAPCD2	Miranda_RNAhybrid	-21.23	155	2276	2299	-29.8	0.236947	2269	2300
hsa-miR-1299	IRX4	Miranda_RNAhybrid	-22.82	163	55	77	-27	0.124147	57	78
hsa-miR-1299	UBE2QL1	Miranda_RNAhybrid	-20.82	164	1332	1353	-27	0.85903	3850	3878
hsa-miR-1299	PAPD7	Miranda_RNAhybrid	-21.2	155	1647	1669	-29.1	0.254878	432	461
hsa-miR-1299	RAI14	Miranda_RNAhybrid	-24.86	153	216	237	-27.9	0.350433	210	238
hsa-miR-1299	PRLR	Miranda_RNAhybrid	-23.38	159	146	169	-27.5	0.930521	143	170
hsa-miR-1299	GDNF	Miranda_RNAhybrid	-21.99	155	1562	1586	-29.3	0.332959	1559	1587
hsa-miR-1299	DAB2	Miranda_RNAhybrid	-22.05	159	919	941	-26.5	0.534647	917	942
hsa-miR-1299	PLCXD3	Miranda_RNAhybrid	-23.1	166	3977	3997	-27.7	0.836142	3976	3997
hsa-miR-1299	EMB	Miranda_RNAhybrid	-22.29	156	1987	2008	-29.8	0.287883	1986	2009
hsa-miR-1299	ELOVL7	Miranda_RNAhybrid	-21.1	159	989	1009	-29.6	0.285946	986	1009
hsa-miR-1299	ADAMTS6	Miranda_RNAhybrid	-22.62	162	1052	1073	-25.9	0.836851	1033	1073
hsa-miR-1299	GCNT4	Miranda_RNAhybrid	-22.42	158	1104	1124	-25	0.631373	1103	1125
hsa-miR-1299	SERINC5	Miranda_RNAhybrid	-22.08	159	3677	3699	-28.7	0.592856	392	418
hsa-miR-1299	DHFR	Miranda_RNAhybrid	-20.78	159	2092	2112	-25	0.916014	2096	2112
hsa-miR-1299	RASGRF2	Miranda_RNAhybrid	-23.82	165	675	696	-27.1	0.787539	678	696
hsa-miR-1299	LIX1	Miranda_RNAhybrid	-22.66	165	2527	2546	-26.9	0.666466	2524	2547
hsa-miR-1299	RIOK2	Miranda_RNAhybrid	-20.5	159	1804	1826	-25.4	0.796402	1803	1826
hsa-miR-1299	MAN2A1	Miranda_RNAhybrid	-22.32	155	588	610	-25.3	0.864542	588	611
hsa-miR-1299	WDR36	Miranda_RNAhybrid	-23.55	154	2426	2448	-26.1	0.857497	2428	2449
hsa-miR-1299	PRDM6	Miranda_RNAhybrid	-25.18	159	4116	4142	-27.4	0.883545	4117	4143
hsa-miR-1299	2018-03-03	Miranda_RNAhybrid	-21.36	163	1805	1827	-25.8	0.829121	1978	2023
hsa-miR-1299	JADE2	Miranda_RNAhybrid	-20.25	163	3801	3822	-26	0.888173	3800	3822
hsa-miR-1299	C5orf66	Miranda_RNAhybrid	-22.17	159	733	756	-26.2	0.434686	736	757
hsa-miR-1299	ETF1	Miranda_RNAhybrid	-23.35	158	88	114	-29.3	0.25206	585	615
hsa-miR-1299	PCDHGA8	Miranda_RNAhybrid	-22.55	150	525	545	-28.2	0.307228	67	89
hsa-miR-1299	PCDHGA7	Miranda_RNAhybrid	-22.55	150	525	545	-28.2	0.307228	67	89
hsa-miR-1299	PCDHGA6	Miranda_RNAhybrid	-22.55	150	525	545	-28.2	0.307228	67	89
hsa-miR-1299	PCDHGA5	Miranda_RNAhybrid	-22.55	150	525	545	-28.2	0.307228	67	89
hsa-miR-1299	PCDHGA4	Miranda_RNAhybrid	-22.55	150	525	545	-28.2	0.307228	67	89
hsa-miR-1299	PCDHGA3	Miranda_RNAhybrid	-22.55	150	525	545	-28.2	0.307228	67	89
hsa-miR-1299	PCDHGA2	Miranda_RNAhybrid	-22.55	150	525	545	-28.2	0.307228	67	89
hsa-miR-1299	PCDHGA1	Miranda_RNAhybrid	-22.55	150	525	545	-28.2	0.307228	67	89
hsa-miR-1299	PCDHGB1	Miranda_RNAhybrid	-22.55	150	525	545	-28.2	0.307228	67	89
hsa-miR-1299	PCDHGA9	Miranda_RNAhybrid	-22.55	150	525	545	-28.2	0.307228	67	89
hsa-miR-1299	PCDHGB7	Miranda_RNAhybrid	-22.55	150	525	545	-28.2	0.307566	67	89
hsa-miR-1299	PCDHGB6	Miranda_RNAhybrid	-22.55	150	525	545	-28.2	0.307228	67	89
hsa-miR-1299	PCDHGB5	Miranda_RNAhybrid	-22.55	150	525	545	-28.2	0.307228	67	89
hsa-miR-1299	PCDHGB4	Miranda_RNAhybrid	-22.55	150	525	545	-28.2	0.307228	67	89
hsa-miR-1299	PCDHGB3	Miranda_RNAhybrid	-22.55	150	525	545	-28.2	0.307228	67	89
hsa-miR-1299	PCDHGB2	Miranda_RNAhybrid	-22.55	150	525	545	-28.2	0.307228	67	89
hsa-miR-1299	PCDHGA10	Miranda_RNAhybrid	-22.55	150	525	545	-28.2	0.307228	67	89
hsa-miR-1299	PCDHGA11	Miranda_RNAhybrid	-22.55	150	525	545	-28.2	0.307228	67	89
hsa-miR-1299	PCDHGA12	Miranda_RNAhybrid	-22.55	150	525	545	-28.2	0.307228	67	89
hsa-miR-1299	PCDHGC5	Miranda_RNAhybrid	-22.55	150	525	545	-28.2	0.307228	67	89
hsa-miR-1299	PCDHGC4	Miranda_RNAhybrid	-22.55	150	525	545	-28.2	0.307228	67	89
hsa-miR-1299	PCDHGC3	Miranda_RNAhybrid	-22.55	150	525	545	-28.2	0.30689	67	89
hsa-miR-1299	SPRY4	Miranda_RNAhybrid	-25.69	154	797	822	-28.9	0.465148	796	823
hsa-miR-1299	SH3TC2	Miranda_RNAhybrid	-22.12	163	2433	2453	-28	0.989425	107	143
hsa-miR-1299	SLC26A2	Miranda_RNAhybrid	-20.18	157	1639	1660	-26.7	0.899415	1628	1661
hsa-miR-1299	TIGD6	Miranda_RNAhybrid	-23.27	152	1294	1312	-26.1	0.576751	1295	1313
hsa-miR-1299	NDST1	Miranda_RNAhybrid	-27.76	174	2937	2958	-31.2	0.271923	2934	2959
hsa-miR-1299	ATOX1	Miranda_RNAhybrid	-24.41	168	54	75	-27.9	0.013196	54	75
hsa-miR-1299	ATP10B	Miranda_RNAhybrid	-25.75	159	961	984	-27.8	0.445983	962	985
hsa-miR-1299	ATAD3C	Miranda_RNAhybrid	-20.28	155	511	534	-25.1	0.734273	509	534
hsa-miR-1299	CHD5	Miranda_RNAhybrid	-21.45	159	410	432	-28.7	0.484516	264	285
hsa-miR-1299	SLC2A5	Miranda_RNAhybrid	-26.61	150	448	474	-29.9	0.038802	448	475
hsa-miR-1299	H6PD	Miranda_RNAhybrid	-20.48	156	751	772	-29.9	0.516136	5499	5531
hsa-miR-1299	MIIP	Miranda_RNAhybrid	-20.92	153	142	163	-25	0.104395	132	164
hsa-miR-1299	TNFRSF1B	Miranda_RNAhybrid	-22.27	155	385	407	-28.5	0.333373	1200	1222
hsa-miR-1299	VPS13D	Miranda_RNAhybrid	-23.12	161	1053	1074	-27.4	0.608031	1039	1075
hsa-miR-1299	MINOS1	Miranda_RNAhybrid	-21.91	152	1526	1547	-27.9	0.580674	1516	1548
hsa-miR-1299	MINOS1-NBL1	Miranda_RNAhybrid	-29.38	163	917	939	-32.2	0.038494	916	940
hsa-miR-1299	NBL1	Miranda_RNAhybrid	-29.38	163	917	939	-32.2	0.038494	916	940
hsa-miR-1299	ASAP3	Miranda_RNAhybrid	-27.05	166	358	381	-30.1	0.095469	358	381
hsa-miR-1299	TCEB3	Miranda_RNAhybrid	-21.27	160	1493	1514	-27	0.593233	1484	1515
hsa-miR-1299	GPR3	Miranda_RNAhybrid	-26.19	177	25	47	-34.1	0.01073	22	48
hsa-miR-1299	KPNA6	Miranda_RNAhybrid	-21.7	155	443	466	-26.2	0.941754	426	467
hsa-miR-1299	ZBTB8A	Miranda_RNAhybrid	-24.9	164	263	284	-27	0.866101	263	285
hsa-miR-1299	ZNF362	Miranda_RNAhybrid	-20.22	150	109	129	-28.5	0.253463	68	91
hsa-miR-1299	RSPO1	Miranda_RNAhybrid	-21.62	156	295	317	-28.2	0.236365	280	318
hsa-miR-1299	C1orf109	Miranda_RNAhybrid	-22.03	164	486	507	-25.6	0.621695	486	508
hsa-miR-1299	RIMKLA	Miranda_RNAhybrid	-20.55	158	4483	4504	-26.5	0.980738	1590	1629
hsa-miR-1299	SLC2A1	Miranda_RNAhybrid	-25.72	162	1473	1496	-28.3	0.272538	1472	1497
hsa-miR-1299	RAB3B	Miranda_RNAhybrid	-22.53	162	10430	10450	-31.7	0.483229	10417	10451
hsa-miR-1299	SH3GLB1	Miranda_RNAhybrid	-26.94	171	3078	3101	-34.7	0.073535	3078	3102
hsa-miR-1299	LPPR5	Miranda_RNAhybrid	-23.87	173	1526	1547	-30.9	0.174247	1518	1547
hsa-miR-1299	CYB561D1	Miranda_RNAhybrid	-21.93	163	430	452	-28	0.677899	422	452
hsa-miR-1299	CTTNBP2NL	Miranda_RNAhybrid	-21.15	158	343	369	-27.4	0.688784	345	369
hsa-miR-1299	MAGI3	Miranda_RNAhybrid	-23.24	158	1791	1816	-26.6	0.797296	1790	1817
hsa-miR-1299	HAO2	Miranda_RNAhybrid	-23.8	170	642	662	-26.7	0.248562	642	663
hsa-miR-1299	SV2A	Miranda_RNAhybrid	-25.3	155	304	326	-29.5	0.172086	303	327
hsa-miR-1299	SEMA6C	Miranda_RNAhybrid	-23.62	151	661	683	-26.4	0.25555	661	683
hsa-miR-1299	SNX27	Miranda_RNAhybrid	-20.09	151	759	782	-26	0.950217	758	782
hsa-miR-1299	RORC	Miranda_RNAhybrid	-21.89	159	802	821	-28.3	0.219308	316	343
hsa-miR-1299	CHRNB2	Miranda_RNAhybrid	-23.09	154	1290	1310	-27.7	0.661534	615	640
hsa-miR-1299	KCNN3	Miranda_RNAhybrid	-20.8	163	4262	4283	-25.9	0.995721	8693	8722
hsa-miR-1299	SHC1	Miranda_RNAhybrid	-23.99	152	4	25	-27.3	0.358412	4	26
hsa-miR-1299	ISG20L2	Miranda_RNAhybrid	-20.6	160	1172	1193	-25.4	0.640387	1169	1194
hsa-miR-1299	CD84	Miranda_RNAhybrid	-26.12	162	3242	3262	-29.7	0.581409	3242	3262
hsa-miR-1299	PBX1	Miranda_RNAhybrid	-20.4	163	4015	4036	-27.6	0.770835	2030	2067
hsa-miR-1299	TIPRL	Miranda_RNAhybrid	-24.24	167	181	203	-28	0.375599	181	203
hsa-miR-1299	SELP	Miranda_RNAhybrid	-22.43	154	544	568	-27.9	0.119031	545	569
hsa-miR-1299	RC3H1	Miranda_RNAhybrid	-22.67	155	3822	3844	-25.6	0.990359	85	116
hsa-miR-1299	XPR1	Miranda_RNAhybrid	-20.05	156	4986	5007	-27.2	0.873791	4984	5008
hsa-miR-1299	RNASEL	Miranda_RNAhybrid	-21.82	151	481	503	-27.9	0.334283	507	535
hsa-miR-1299	RGS8	Miranda_RNAhybrid	-21.99	155	648	670	-26.7	0.692057	741	773
hsa-miR-1299	C1orf21	Miranda_RNAhybrid	-20.93	150	7824	7844	-30.4	0.580263	9167	9189
hsa-miR-1299	TNNI1	Miranda_RNAhybrid	-22.16	160	2130	2151	-27.4	0.816913	822	853
hsa-miR-1299	ELF3	Miranda_RNAhybrid	-22.88	160	1611	1630	-29.8	0.169728	543	576
hsa-miR-1299	SYT2	Miranda_RNAhybrid	-21.2	152	2903	2924	-25.9	0.968005	980	1023
hsa-miR-1299	ATP2B4	Miranda_RNAhybrid	-21.53	154	964	984	-26.6	0.858536	1	25
hsa-miR-1299	LOC101059976	Miranda_RNAhybrid	-20.11	154	455	475	-26.6	0.392994	432	475
hsa-miR-1299	YOD1	Miranda_RNAhybrid	-22.7	162	1350	1374	-30.7	0.339826	31	48
hsa-miR-1299	RD3	Miranda_RNAhybrid	-24.13	152	851	872	-27.5	0.519013	850	873
hsa-miR-1299	C1orf95	Miranda_RNAhybrid	-23.2	165	6880	6901	-32.6	0.240257	6872	6901
hsa-miR-1299	IBA57	Miranda_RNAhybrid	-20.36	163	3988	4009	-29.4	0.603488	1484	1508
hsa-miR-1299	TRIM11	Miranda_RNAhybrid	-21.85	152	285	306	-25.1	0.544442	277	307
hsa-miR-1299	RNF187	Miranda_RNAhybrid	-23.52	160	1533	1554	-26.7	0.611107	1995	2029
hsa-miR-1299	C1orf198	Miranda_RNAhybrid	-20.5	155	1356	1378	-32	0.10783	568	589
hsa-miR-1299	DISC1	Miranda_RNAhybrid	-22.43	157	2028	2051	-29.1	0.494833	2023	2052
hsa-miR-1299	B3GALNT2	Miranda_RNAhybrid	-23.75	166	98	118	-28.3	0.468506	97	118
hsa-miR-1299	KMO	Miranda_RNAhybrid	-22.21	157	481	501	-25.2	0.93649	2180	2204
hsa-miR-1299	C1orf229	Miranda_RNAhybrid	-21.87	167	851	872	-26.9	0.379501	833	873
hsa-miR-1299	LARP4B	Miranda_RNAhybrid	-20.24	155	1028	1051	-28.7	0.665335	5416	5446
hsa-miR-1299	ADARB2	Miranda_RNAhybrid	-20.4	154	2251	2275	-27	0.881422	4650	4687
hsa-miR-1299	C10orf67	Miranda_RNAhybrid	-20.76	164	1037	1058	-25.1	0.853892	1034	1059
hsa-miR-1299	GPR158	Miranda_RNAhybrid	-21.71	163	533	557	-25.8	0.836658	534	557
hsa-miR-1299	ZNF37A	Miranda_RNAhybrid	-20.93	158	1371	1394	-26.2	0.900811	1369	1394
hsa-miR-1299	BMS1	Miranda_RNAhybrid	-26.08	159	377	400	-29.2	0.429378	377	401
hsa-miR-1299	NPY4R	Miranda_RNAhybrid	-26.53	165	197	218	-28.4	0.040813	197	219
hsa-miR-1299	LOC100996758	Miranda_RNAhybrid	-26.53	165	197	218	-28.4	0.065104	197	219
hsa-miR-1299	C10orf128	Miranda_RNAhybrid	-22.76	156	242	263	-26.5	0.46281	241	263
hsa-miR-1299	VPS26A	Miranda_RNAhybrid	-20.67	150	578	598	-29.5	0.159861	1419	1454
hsa-miR-1299	EIF4EBP2	Miranda_RNAhybrid	-25.46	157	3462	3484	-29.7	0.566451	3461	3485
hsa-miR-1299	C10orf105	Miranda_RNAhybrid	-23.81	156	2973	2996	-29.3	0.449841	327	361
hsa-miR-1299	MSS51	Miranda_RNAhybrid	-24.72	151	532	555	-27.8	0.183297	532	556
hsa-miR-1299	SAMD8	Miranda_RNAhybrid	-24.47	172	4469	4490	-26.5	0.926202	4469	4491
hsa-miR-1299	KLLN	Miranda_RNAhybrid	-21.63	160	1008	1029	-27.3	0.590943	1427	1464
hsa-miR-1299	LIPN	Miranda_RNAhybrid	-22.3	152	515	536	-25.4	0.316804	515	537
hsa-miR-1299	FAS	Miranda_RNAhybrid	-20.28	151	1542	1568	-25.7	0.811414	443	462
hsa-miR-1299	HTR7	Miranda_RNAhybrid	-23.12	158	248	269	-26.2	0.561277	247	270
hsa-miR-1299	TNKS2	Miranda_RNAhybrid	-25.44	168	543	564	-28.6	0.359148	543	565
hsa-miR-1299	BTAF1	Miranda_RNAhybrid	-24.65	167	775	796	-27.4	0.458771	779	797
hsa-miR-1299	ENTPD1	Miranda_RNAhybrid	-20.13	152	926	948	-30.2	0.657472	7587	7618
hsa-miR-1299	ARHGAP19	Miranda_RNAhybrid	-23.69	159	2911	2937	-27.3	0.722552	2911	2938
hsa-miR-1299	MORN4	Miranda_RNAhybrid	-20.31	158	129	150	-27.1	0.431857	127	151
hsa-miR-1299	ENTPD7	Miranda_RNAhybrid	-20.44	155	1194	1218	-25.3	0.990596	500	524
hsa-miR-1299	SUFU	Miranda_RNAhybrid	-21.17	155	1229	1252	-29.3	0.370815	1208	1253
hsa-miR-1299	RPEL1	Miranda_RNAhybrid	-25.94	152	1049	1068	-28.5	0.197127	1049	1069
hsa-miR-1299	GPAM	Miranda_RNAhybrid	-22.16	167	2234	2257	-26.6	0.799305	2234	2257
hsa-miR-1299	ACADSB	Miranda_RNAhybrid	-21.34	160	2695	2717	-34.3	0.077597	2687	2718
hsa-miR-1299	KNDC1	Miranda_RNAhybrid	-25.69	172	10	31	-26.2	0.52325	5	31
hsa-miR-1299	PRAP1	Miranda_RNAhybrid	-21.87	162	163	186	-26.3	0.052832	161	186
hsa-miR-1299	LPIN1	Miranda_RNAhybrid	-26.59	151	2064	2091	-32.5	0.083266	1943	1968
hsa-miR-4517	ANKS6	Miranda_RNAhybrid	-21.38	156	1031	1064	-25.8	0.94976	1031	1065
hsa-miR-4517	QSOX2	Miranda_RNAhybrid	-25	187	1961	1985	-30.8	0.169292	1961	1985
hsa-miR-4517	MMACHC	Miranda_RNAhybrid	-23.86	184	381	404	-28.6	0.301273	376	404
hsa-miR-4517	DNAJC6	Miranda_RNAhybrid	-22.83	172	2135	2160	-26.5	0.7593	2135	2161
hsa-miR-4517	LRRC8B	Miranda_RNAhybrid	-20.82	167	4259	4283	-26.2	0.933303	4259	4284
hsa-miR-4517	NRAS	Miranda_RNAhybrid	-22.11	177	2973	2998	-25.5	0.938175	2975	2999
hsa-miR-4517	MAP10	Miranda_RNAhybrid	-22.58	170	603	628	-26	0.742254	603	629
hsa-miR-7974	ADAMTSL1	Miranda_RNAhybrid	-22.62	151	308	333	-33.6	0.114682	978	1009
hsa-miR-7974	SLC24A2	Miranda_RNAhybrid	-22.15	151	80	101	-31.8	0.621526	51	101
hsa-miR-7974	CDKN2B	Miranda_RNAhybrid	-23.6	150	266	292	-31.7	0.315401	254	292
hsa-miR-7974	UBAP2	Miranda_RNAhybrid	-25.82	161	297	320	-29.7	0.145882	296	321
hsa-miR-7974	FAM219A	Miranda_RNAhybrid	-20.01	153	1818	1843	-35	0.080531	1116	1146
hsa-miR-7974	KIAA1045	Miranda_RNAhybrid	-23.13	150	876	897	-37.2	0.061681	1723	1750
hsa-miR-7974	VCP	Miranda_RNAhybrid	-36.14	162	77	101	-38	0.006039	76	102
hsa-miR-7974	TLN1	Miranda_RNAhybrid	-21.54	152	311	335	-25.7	0.367003	311	336
hsa-miR-7974	RNF38	Miranda_RNAhybrid	-22.24	162	1775	1798	-28.9	0.676771	1271	1304
hsa-miR-7974	PAX5	Miranda_RNAhybrid	-27.61	159	3845	3868	-33.7	0.333717	3844	3868
hsa-miR-7974	POLR1E	Miranda_RNAhybrid	-24.98	164	21	43	-37.1	0.002469	18	43
hsa-miR-7974	SPATA31D3	Miranda_RNAhybrid	-24.83	154	1856	1882	-28	0.636256	1284	1332
hsa-miR-7974	S1PR3	Miranda_RNAhybrid	-24.28	155	2291	2312	-34.2	0.110488	82	117
hsa-miR-7974	CENPP	Miranda_RNAhybrid	-35.56	182	845	868	-40.6	0.005677	845	868
hsa-miR-7974	NINJ1	Miranda_RNAhybrid	-21.52	158	499	522	-27.2	0.353117	236	264
hsa-miR-7974	WNK2	Miranda_RNAhybrid	-22.46	160	773	797	-30.7	0.178596	765	797
hsa-miR-7974	ZNF169	Miranda_RNAhybrid	-20.12	161	390	413	-29.1	0.385195	379	413
hsa-miR-7974	GABBR2	Miranda_RNAhybrid	-29.75	155	543	572	-36.6	0.038106	539	572
hsa-miR-7974	STX17	Miranda_RNAhybrid	-25.8	164	5143	5167	-29.2	0.820281	5145	5168
hsa-miR-7974	ERP44	Miranda_RNAhybrid	-22.53	154	2348	2371	-30.3	0.488006	2539	2581
hsa-miR-7974	PALM2-AKAP2	Miranda_RNAhybrid	-24.54	159	2398	2425	-34.1	0.168446	382	404
hsa-miR-7974	AKAP2	Miranda_RNAhybrid	-24.54	159	2398	2425	-34.1	0.168446	382	404
hsa-miR-7974	SLC46A2	Miranda_RNAhybrid	-23.66	155	426	453	-32.7	0.042789	398	454
hsa-miR-7974	ALAD	Miranda_RNAhybrid	-26.49	150	291	316	-29.6	0.393905	275	317
hsa-miR-7974	ZNF618	Miranda_RNAhybrid	-22.6	150	1376	1397	-34.7	0.219121	1420	1450
hsa-miR-7974	C9orf91	Miranda_RNAhybrid	-20.93	150	1078	1105	-32.8	0.203754	48	72
hsa-miR-7974	PAPPA	Miranda_RNAhybrid	-25.49	157	1355	1377	-33.5	0.286964	1342	1378
hsa-miR-7974	NR5A1	Miranda_RNAhybrid	-25.85	156	1429	1450	-35.4	0.031751	39	69
hsa-miR-7974	NR6A1	Miranda_RNAhybrid	-21.67	153	1529	1552	-28.4	0.88412	4188	4209
hsa-miR-7974	OLFML2A	Miranda_RNAhybrid	-25.07	158	1701	1724	-36.1	0.093168	1474	1507
hsa-miR-7974	GOLGA1	Miranda_RNAhybrid	-24.08	161	1717	1739	-29.4	0.455672	996	1022
hsa-miR-7974	MVB12B	Miranda_RNAhybrid	-36.42	151	2040	2072	-37.3	0.049023	2036	2072
hsa-miR-7974	LMX1B	Miranda_RNAhybrid	-22.99	155	167	190	-34.8	0.151406	4056	4079
hsa-miR-7974	DNM1	Miranda_RNAhybrid	-34.6	165	413	437	-39	0.005282	412	437
hsa-miR-7974	LRRC8A	Miranda_RNAhybrid	-27.2	166	1351	1372	-35.4	0.035871	1349	1372
hsa-miR-7974	CRAT	Miranda_RNAhybrid	-24.97	155	8	35	-31.6	0.042952	7	35
hsa-miR-7974	GPR107	Miranda_RNAhybrid	-26.67	166	3182	3203	-33.7	0.241625	1263	1292
hsa-miR-7974	NCS1	Miranda_RNAhybrid	-22.56	153	2622	2644	-33.3	0.238423	1174	1203
hsa-miR-7974	NUP214	Miranda_RNAhybrid	-23.66	151	227	249	-28.9	0.303033	227	249
hsa-miR-7974	MED27	Miranda_RNAhybrid	-20.53	150	41	64	-29.8	0.118288	516	548
hsa-miR-7974	DDX31	Miranda_RNAhybrid	-24.97	161	122	143	-29.1	0.431092	125	143
hsa-miR-7974	GTF3C5	Miranda_RNAhybrid	-23.18	157	77	102	-28.2	0.19266	539	574
hsa-miR-7974	MED22	Miranda_RNAhybrid	-22.36	165	2655	2678	-35.1	0.091652	1243	1275
hsa-miR-7974	VAV2	Miranda_RNAhybrid	-26.39	165	1216	1239	-36.3	0.035528	1916	1941
hsa-miR-7974	LOC101928038	Miranda_RNAhybrid	-21.62	157	895	918	-31.9	0.074523	883	918
hsa-miR-7974	PPP1R26	Miranda_RNAhybrid	-23.5	157	311	334	-31.7	0.056368	299	334
hsa-miR-7974	SOHLH1	Miranda_RNAhybrid	-26.87	161	381	405	-38.1	0.004822	366	406
hsa-miR-7974	CAMSAP1	Miranda_RNAhybrid	-25.44	164	285	309	-39.7	0.013302	281	309
hsa-miR-7974	C9orf69	Miranda_RNAhybrid	-26.06	164	962	986	-31.8	0.175919	369	423
hsa-miR-7974	INPP5E	Miranda_RNAhybrid	-30.66	172	535	557	-32.7	0.059188	536	558
hsa-miR-7974	NOTCH1	Miranda_RNAhybrid	-23.5	157	977	1000	-30.2	0.263287	967	1001
hsa-miR-7974	TMEM141	Miranda_RNAhybrid	-26.68	153	32	57	-35.9	0.004168	28	58
hsa-miR-7974	TRAF2	Miranda_RNAhybrid	-26.76	158	617	640	-40.1	0.001229	112	142
hsa-miR-7974	C9orf139	Miranda_RNAhybrid	-29.71	155	1326	1352	-36.7	0.022178	1324	1353
hsa-miR-7974	ENTPD2	Miranda_RNAhybrid	-30.75	174	464	487	-37.9	0.002131	459	487
hsa-miR-7974	SAPCD2	Miranda_RNAhybrid	-23.4	152	1510	1536	-34	0.105252	738	767
hsa-miR-7974	TOR4A	Miranda_RNAhybrid	-22.86	157	423	446	-32	0.22918	546	585
hsa-miR-7974	NSMF	Miranda_RNAhybrid	-25.05	162	1700	1723	-37.4	0.018001	1636	1681
hsa-miR-7974	PLEKHG4B	Miranda_RNAhybrid	-25	152	4364	4393	-39.7	0.047419	422	448
hsa-miR-7974	TPPP	Miranda_RNAhybrid	-21.33	150	2875	2900	-32.7	0.341893	102	133
hsa-miR-7974	SLC6A19	Miranda_RNAhybrid	-30.9	165	2052	2076	-34.1	0.132794	2053	2077
hsa-miR-7974	ADAMTS16	Miranda_RNAhybrid	-21.62	154	867	890	-29.2	0.264842	483	546
hsa-miR-7974	PAPD7	Miranda_RNAhybrid	-28.51	165	1177	1197	-33.2	0.114596	1175	1197
hsa-miR-7974	ADCY2	Miranda_RNAhybrid	-23.99	160	1138	1160	-29.8	0.533008	2453	2496
hsa-miR-7974	CCT5	Miranda_RNAhybrid	-24.69	151	480	504	-30.1	0.269224	479	505
hsa-miR-7974	ANKRD33B	Miranda_RNAhybrid	-28.44	169	5389	5412	-35.5	0.200647	6521	6541
hsa-miR-7974	DAP	Miranda_RNAhybrid	-31.2	170	1320	1344	-33.8	0.07668	1322	1345
hsa-miR-7974	FBXL7	Miranda_RNAhybrid	-22.6	160	673	694	-30.7	0.348397	1921	1954
hsa-miR-7974	DNAJC21	Miranda_RNAhybrid	-33.65	161	3314	3343	-36.5	0.075888	3315	3343
hsa-miR-7974	SREK1IP1	Miranda_RNAhybrid	-21.1	158	82	105	-27.5	0.966454	1564	1597
hsa-miR-7974	PDE8B	Miranda_RNAhybrid	-21.68	157	537	560	-30.3	0.265034	618	658
hsa-miR-7974	CCNH	Miranda_RNAhybrid	-22.08	153	279	303	-28.9	0.172946	280	303
hsa-miR-7974	DCP2	Miranda_RNAhybrid	-20.49	153	4558	4580	-26.2	0.999199	4908	4943
hsa-miR-7974	C5orf63	Miranda_RNAhybrid	-30.27	167	4374	4395	-32.9	0.31498	4375	4396
hsa-miR-7974	FBN2	Miranda_RNAhybrid	-22.81	152	21	43	-30.6	0.215198	14	43
hsa-miR-7974	CSF2	Miranda_RNAhybrid	-23.94	158	84	107	-32.5	0.009965	82	107
hsa-miR-7974	PDLIM4	Miranda_RNAhybrid	-24.61	162	228	251	-32.6	0.074743	479	513
hsa-miR-7974	CXCL14	Miranda_RNAhybrid	-29.92	160	477	499	-37.6	0.008577	466	500
hsa-miR-7974	SMAD5	Miranda_RNAhybrid	-24.33	160	747	773	-28.5	0.866736	748	774
hsa-miR-7974	TRPC7	Miranda_RNAhybrid	-25.91	158	478	499	-30.8	0.070444	222	244
hsa-miR-7974	RELL2	Miranda_RNAhybrid	-39.6	187	147	169	-44.9	3.8e-05	145	169
hsa-miR-7974	FCHSD1	Miranda_RNAhybrid	-22.17	167	68	91	-34	0.08893	606	629
hsa-miR-7974	ARHGAP26	Miranda_RNAhybrid	-20.04	150	5089	5113	-33.3	0.344535	3010	3039
hsa-miR-7974	KCTD16	Miranda_RNAhybrid	-20.93	150	4245	4268	-28.5	0.82076	601	628
hsa-miR-7974	SH3TC2	Miranda_RNAhybrid	-23.32	153	538	557	-32.6	0.81193	16961	16984
hsa-miR-7974	PPARGC1B	Miranda_RNAhybrid	-23.37	158	6561	6584	-34.8	0.243613	3732	3757
hsa-miR-7974	CDX1	Miranda_RNAhybrid	-25.34	160	561	585	-33.3	0.035199	543	585
hsa-miR-7974	NDST1	Miranda_RNAhybrid	-23.32	164	3380	3403	-34.4	0.18525	2324	2356
hsa-miR-7974	CYFIP2	Miranda_RNAhybrid	-29.9	154	38	65	-33.4	0.13558	668	701
hsa-miR-7974	ADAM19	Miranda_RNAhybrid	-20.17	162	2059	2082	-31.4	0.373594	524	548
hsa-miR-7974	SH3PXD2B	Miranda_RNAhybrid	-26.15	151	209	228	-31.8	0.419342	1348	1376
hsa-miR-7974	UNC5A	Miranda_RNAhybrid	-26.21	163	457	483	-33.7	0.036347	443	483
hsa-miR-7974	FGFR4	Miranda_RNAhybrid	-28.83	153	42	66	-33.3	0.012382	35	67
hsa-miR-7974	N4BP3	Miranda_RNAhybrid	-25.41	152	2088	2116	-31.7	0.375291	2070	2117
hsa-miR-7974	RUFY1	Miranda_RNAhybrid	-28.59	155	7	25	-30.6	0.052193	9	26
hsa-miR-7974	RASGEF1C	Miranda_RNAhybrid	-20.7	154	34	57	-31.1	0.067695	561	593
hsa-miR-7974	C1orf159	Miranda_RNAhybrid	-30.23	159	489	511	-35.4	0.019192	488	512
hsa-miR-7974	PUSL1	Miranda_RNAhybrid	-25.94	160	170	192	-31.9	0.011847	163	192
hsa-miR-7974	SLC35E2B	Miranda_RNAhybrid	-21.52	153	3988	4010	-32	0.356989	333	372
hsa-miR-7974	SLC35E2	Miranda_RNAhybrid	-21.52	153	4754	4776	-29.2	0.775808	2392	2433
hsa-miR-7974	KIAA1751	Miranda_RNAhybrid	-32.34	171	279	304	-37.4	0.000974	278	305
hsa-miR-7974	PRKCZ	Miranda_RNAhybrid	-29.56	162	605	628	-34.1	0.046179	604	628
hsa-miR-7974	PRDM16	Miranda_RNAhybrid	-25.67	165	1257	1281	-38.1	0.048236	1236	1281
hsa-miR-7974	ARHGEF16	Miranda_RNAhybrid	-28.88	159	9	33	-32.9	0.019272	9	34
hsa-miR-7974	TP73	Miranda_RNAhybrid	-25.7	153	1535	1560	-35	0.092316	1943	1968
hsa-miR-7974	KCNAB2	Miranda_RNAhybrid	-24.58	163	2543	2565	-29.1	0.555926	1262	1300
hsa-miR-7974	ESPN	Miranda_RNAhybrid	-29.33	160	78	101	-35.8	0.010164	81	101
hsa-miR-7974	GPR157	Miranda_RNAhybrid	-24.84	153	562	584	-30.5	0.13772	549	584
hsa-miR-7974	H6PD	Miranda_RNAhybrid	-32.16	158	1310	1335	-39.2	0.046588	2365	2410
hsa-miR-7974	MTOR	Miranda_RNAhybrid	-21.79	157	377	401	-28.7	0.259678	615	652
hsa-miR-7974	VPS13D	Miranda_RNAhybrid	-23.95	151	995	1018	-28.4	0.710252	1764	1800
hsa-miR-7974	EPHA2	Miranda_RNAhybrid	-32.05	158	258	282	-33.4	0.033272	184	222
hsa-miR-7974	PAX7	Miranda_RNAhybrid	-29.34	169	473	497	-32.5	0.283201	473	497
hsa-miR-7974	HSPG2	Miranda_RNAhybrid	-24.89	159	624	646	-32.6	0.061727	129	173
hsa-miR-7974	WNT4	Miranda_RNAhybrid	-24.67	156	2457	2482	-30	0.449627	2447	2482
hsa-miR-7974	ZBTB40	Miranda_RNAhybrid	-24.19	151	3990	4008	-33.6	0.236259	3975	4008
hsa-miR-7974	C1orf234	Miranda_RNAhybrid	-23.84	160	40	66	-27.8	0.005774	42	67
hsa-miR-7974	ASAP3	Miranda_RNAhybrid	-26.87	164	713	737	-30.4	0.191411	1088	1130
hsa-miR-7974	PITHD1	Miranda_RNAhybrid	-33.31	151	160	190	-37.1	0.007461	160	191
hsa-miR-7974	MYOM3	Miranda_RNAhybrid	-24.9	153	52	75	-31.1	0.150022	465	500
hsa-miR-7974	STPG1	Miranda_RNAhybrid	-28.36	176	1302	1325	-34.5	0.046626	1305	1325
hsa-miR-7974	LDLRAP1	Miranda_RNAhybrid	-35.72	185	1789	1813	-39.9	0.014779	1790	1813
hsa-miR-7974	MAN1C1	Miranda_RNAhybrid	-21.61	154	899	921	-32.5	0.176799	879	921
hsa-miR-7974	SEPN1	Miranda_RNAhybrid	-27.35	164	128	152	-31.4	0.263428	1361	1413
hsa-miR-7974	ZDHHC18	Miranda_RNAhybrid	-24.03	151	626	649	-32.2	0.147184	580	607
hsa-miR-7974	GPATCH3	Miranda_RNAhybrid	-21.26	160	290	313	-34.8	0.007912	285	314
hsa-miR-7974	NR0B2	Miranda_RNAhybrid	-26.12	153	202	225	-29.7	0.047385	201	226
hsa-miR-7974	SLC9A1	Miranda_RNAhybrid	-22.97	153	117	139	-29.1	0.35507	434	466
hsa-miR-7974	CD164L2	Miranda_RNAhybrid	-28.17	155	408	432	-32.6	0.052456	407	433
hsa-miR-7974	GPR3	Miranda_RNAhybrid	-24.05	169	209	232	-28.7	0.280804	852	879
hsa-miR-7974	WASF2	Miranda_RNAhybrid	-21.29	153	712	735	-35.7	0.093694	1366	1390
hsa-miR-7974	EYA3	Miranda_RNAhybrid	-26.36	159	1652	1675	-34	0.179165	1637	1676
hsa-miR-7974	SDC3	Miranda_RNAhybrid	-30.86	156	2025	2050	-34.3	0.145919	2025	2051
hsa-miR-7974	SERINC2	Miranda_RNAhybrid	-20.75	160	1	16	-27.7	0.174647	1	17
hsa-miR-7974	PEF1	Miranda_RNAhybrid	-26.48	163	249	272	-36.5	0.006742	140	166
hsa-miR-7974	FNDC5	Miranda_RNAhybrid	-22.73	152	1105	1125	-32.1	0.195308	930	978
hsa-miR-7974	ZMYM4	Miranda_RNAhybrid	-20.32	151	816	842	-30.6	0.316746	807	843
hsa-miR-7974	COL8A2	Miranda_RNAhybrid	-28.03	152	235	256	-34.7	0.072949	664	700
hsa-miR-7974	GJA9	Miranda_RNAhybrid	-24.13	163	301	323	-30.8	0.044452	285	324
hsa-miR-7974	PPIE	Miranda_RNAhybrid	-27.6	156	2738	2766	-35.9	0.073294	415	457
hsa-miR-7974	RIMS3	Miranda_RNAhybrid	-22.92	157	1310	1333	-33.1	0.331853	1126	1159
hsa-miR-7974	NFYC	Miranda_RNAhybrid	-23.33	153	50	73	-27.3	0.351523	50	74
hsa-miR-7974	LEPRE1	Miranda_RNAhybrid	-28.47	157	327	353	-31.7	0.038454	328	354
hsa-miR-7974	SZT2	Miranda_RNAhybrid	-22.05	155	927	952	-32.4	0.280893	3251	3280
hsa-miR-7974	B4GALT2	Miranda_RNAhybrid	-22.05	155	37	60	-26.3	0.458961	14	61
hsa-miR-7974	NASP	Miranda_RNAhybrid	-20.23	150	1	15	-28	0.263217	527	562
hsa-miR-7974	CYP4A11	Miranda_RNAhybrid	-30.69	163	646	667	-33.4	0.03725	647	668
hsa-miR-7974	ZYG11B	Miranda_RNAhybrid	-24.01	154	5066	5089	-29.8	0.738589	5067	5090
hsa-miR-7974	GLIS1	Miranda_RNAhybrid	-26.1	158	81	107	-31.7	0.020422	77	107
hsa-miR-7974	DIO1	Miranda_RNAhybrid	-20.29	159	978	999	-28.4	0.33245	282	321
hsa-miR-7974	SSBP3	Miranda_RNAhybrid	-24.64	169	816	839	-31.5	0.171405	1337	1357
hsa-miR-7974	ROR1	Miranda_RNAhybrid	-27.75	155	807	832	-32	0.228367	808	833
hsa-miR-7974	NEGR1	Miranda_RNAhybrid	-21.53	158	3398	3421	-29	0.764897	4102	4132
hsa-miR-7974	DDAH1	Miranda_RNAhybrid	-20.04	151	484	507	-26.9	0.888261	489	507
hsa-miR-7974	SORT1	Miranda_RNAhybrid	-30.21	159	464	487	-33.9	0.201029	464	488
hsa-miR-7974	CYB561D1	Miranda_RNAhybrid	-20.68	155	2308	2331	-35.9	0.104761	1464	1496
hsa-miR-7974	CSF1	Miranda_RNAhybrid	-30.92	153	1750	1774	-35	0.058465	1749	1775
hsa-miR-7974	DCLRE1B	Miranda_RNAhybrid	-26.79	153	890	912	-30.8	0.248491	881	913
hsa-miR-7974	SYT6	Miranda_RNAhybrid	-20.36	152	2782	2805	-32.9	0.178583	2363	2408
hsa-miR-7974	VANGL1	Miranda_RNAhybrid	-23.81	154	4886	4911	-28.3	0.935524	4881	4911
hsa-miR-7974	CD2	Miranda_RNAhybrid	-22.63	152	109	133	-29.8	0.06223	115	133
hsa-miR-7974	TNFAIP8L2	Miranda_RNAhybrid	-25.1	157	318	342	-27.7	0.18273	324	342
hsa-miR-7974	PI4KB	Miranda_RNAhybrid	-27.65	153	565	591	-31.3	0.105151	564	591
hsa-miR-7974	POGZ	Miranda_RNAhybrid	-22.79	157	1843	1865	-26.8	0.800466	1833	1866
hsa-miR-7974	THEM4	Miranda_RNAhybrid	-22.43	157	737	761	-31.6	0.381672	2796	2833
hsa-miR-7974	SNAPIN	Miranda_RNAhybrid	-23.35	155	162	187	-31.8	0.034278	160	187
hsa-miR-7974	IL6R	Miranda_RNAhybrid	-32.71	178	813	836	-37.3	0.053683	811	837
hsa-miR-7974	CHRNB2	Miranda_RNAhybrid	-23.43	153	592	617	-32.4	0.293066	3069	3097
hsa-miR-7974	PYGO2	Miranda_RNAhybrid	-23.88	152	978	1004	-32.2	0.136092	1434	1455
hsa-miR-7974	MUC1	Miranda_RNAhybrid	-34.99	173	104	129	-41	0.000147	102	130
hsa-miR-7974	SYT11	Miranda_RNAhybrid	-20.94	153	3275	3295	-28.4	0.775562	1190	1222
hsa-miR-7974	MEX3A	Miranda_RNAhybrid	-30.28	159	1770	1794	-36.3	0.088471	1769	1794
hsa-miR-7974	SEMA4A	Miranda_RNAhybrid	-24.08	153	46	70	-29.8	0.127761	37	70
hsa-miR-7974	FCRL5	Miranda_RNAhybrid	-25.29	165	479	501	-35.1	0.061402	1812	1849
hsa-miR-7974	CADM3	Miranda_RNAhybrid	-28.14	158	1482	1507	-29.9	0.389377	1483	1508
hsa-miR-7974	NOS1AP	Miranda_RNAhybrid	-26.28	158	1070	1094	-30.6	0.353073	1075	1094
hsa-miR-7974	C1orf111	Miranda_RNAhybrid	-20.62	151	5	29	-26	0.098844	37	62
hsa-miR-7974	GPR161	Miranda_RNAhybrid	-22.99	150	800	825	-36.6	0.10701	1	31
hsa-miR-7974	PRDX6	Miranda_RNAhybrid	-21.47	160	77	100	-26.8	0.495966	80	100
hsa-miR-7974	CENPL	Miranda_RNAhybrid	-23.8	154	174	198	-27.4	0.391157	176	198
hsa-miR-7974	TNR	Miranda_RNAhybrid	-20.36	153	371	394	-27.4	0.237677	361	395
hsa-miR-7974	TOR1AIP2	Miranda_RNAhybrid	-20.68	152	5745	5769	-30.5	0.667811	5733	5769
hsa-miR-7974	LHX4	Miranda_RNAhybrid	-25.62	171	417	442	-29.9	0.064993	416	442
hsa-miR-7974	MR1	Miranda_RNAhybrid	-20.3	153	5811	5835	-31.6	0.551094	5804	5835
hsa-miR-7974	SMG7	Miranda_RNAhybrid	-25.3	157	846	872	-31.1	0.266814	848	873
hsa-miR-7974	NR5A2	Miranda_RNAhybrid	-26.1	175	2781	2804	-36.1	0.062538	2771	2804
hsa-miR-7974	KIF21B	Miranda_RNAhybrid	-26.74	153	1405	1432	-33.3	0.25787	1592	1622
hsa-miR-7974	NAV1	Miranda_RNAhybrid	-27.57	154	5958	5986	-31.6	0.56954	6397	6425
hsa-miR-7974	PTPN7	Miranda_RNAhybrid	-27.42	158	1455	1483	-37.3	0.015428	1443	1483
hsa-miR-7974	CNTN2	Miranda_RNAhybrid	-20.52	151	1309	1331	-33.8	0.199182	4053	4075
hsa-miR-7974	TMEM81	Miranda_RNAhybrid	-25.99	163	98	125	-31.1	0.03154	99	125
hsa-miR-7974	SRGAP2	Miranda_RNAhybrid	-23.43	157	1464	1492	-30.5	0.418623	1461	1492
hsa-miR-7974	FAIM3	Miranda_RNAhybrid	-26.02	158	1043	1067	-36	0.029638	353	382
hsa-miR-7974	PLXNA2	Miranda_RNAhybrid	-21.9	159	4313	4335	-30.9	0.542942	4302	4335
hsa-miR-7974	HHAT	Miranda_RNAhybrid	-20.22	158	143	166	-33.7	0.084697	1435	1466
hsa-miR-7974	RD3	Miranda_RNAhybrid	-27.85	158	470	496	-35.3	0.062812	572	613
hsa-miR-7974	NSL1	Miranda_RNAhybrid	-26.69	161	11695	11716	-35.1	0.344867	6810	6842
hsa-miR-7974	C1orf95	Miranda_RNAhybrid	-23.54	150	3338	3361	-34.8	0.234979	3334	3362
hsa-miR-7974	WNT3A	Miranda_RNAhybrid	-24.94	166	1428	1451	-35	0.046889	442	466
hsa-miR-7974	ARF1	Miranda_RNAhybrid	-26.53	154	668	690	-38.4	0.006305	665	690
hsa-miR-7974	TTC13	Miranda_RNAhybrid	-22.7	164	503	525	-35.6	0.008189	491	525
hsa-miR-7974	DISC1	Miranda_RNAhybrid	-24.45	163	4022	4047	-27.9	0.885553	4026	4048
hsa-miR-7974	TOMM20	Miranda_RNAhybrid	-22.61	157	1417	1440	-34.9	0.080675	1785	1831
hsa-miR-7974	EDARADD	Miranda_RNAhybrid	-26.27	152	1066	1090	-32.5	0.145981	1414	1443
hsa-miR-7974	DESI2	Miranda_RNAhybrid	-29.58	158	528	554	-34.7	0.107797	527	554
hsa-miR-7974	TRIM58	Miranda_RNAhybrid	-23.31	166	3331	3354	-25.7	0.985517	2921	2963
hsa-miR-7974	SH3BP5L	Miranda_RNAhybrid	-21.97	156	156	178	-32.7	0.088848	1319	1349
hsa-miR-7974	LARP4B	Miranda_RNAhybrid	-31.88	155	5088	5112	-34.8	0.198965	5088	5113
hsa-miR-7974	LOC102723422	Miranda_RNAhybrid	-27.56	168	1541	1567	-33.2	0.080844	1542	1568
hsa-miR-7974	ADARB2	Miranda_RNAhybrid	-21.13	150	2732	2753	-34.4	0.222081	3638	3664
hsa-miR-7974	KLF6	Miranda_RNAhybrid	-21.56	156	1827	1853	-25.2	0.993182	2000	2046
hsa-miR-7974	AKR1C4	Miranda_RNAhybrid	-20.78	151	69	93	-25.6	0.1254	73	94
hsa-miR-7974	RBM17	Miranda_RNAhybrid	-22.96	153	59	83	-29.7	0.362511	51	84
hsa-miR-7974	C10orf126	Miranda_RNAhybrid	-21.35	151	1225	1246	-25.5	0.852786	1229	1246
hsa-miR-7974	CCNY	Miranda_RNAhybrid	-29.25	159	1700	1723	-32	0.298886	1699	1724
hsa-miR-7974	CXCL12	Miranda_RNAhybrid	-26.79	160	53	79	-32.6	0.223011	341	369
hsa-miR-7974	SYT15	Miranda_RNAhybrid	-24.88	151	260	281	-33.4	0.218094	246	281
hsa-miR-7974	LOC102724488	Miranda_RNAhybrid	-24.88	151	260	281	-33.4	0.043376	246	281
hsa-miR-7974	VSTM4	Miranda_RNAhybrid	-28.49	166	4692	4716	-34.3	0.21108	4679	4716
hsa-miR-7974	AIFM2	Miranda_RNAhybrid	-26.93	161	267	287	-35.8	0.036661	265	287
hsa-miR-7974	PALD1	Miranda_RNAhybrid	-28.63	164	167	190	-32.6	0.113824	168	190
hsa-miR-7974	ADAMTS14	Miranda_RNAhybrid	-24.94	158	447	471	-35.8	0.028358	438	471
hsa-miR-7974	C10orf54	Miranda_RNAhybrid	-21.62	151	2032	2055	-34.1	0.153417	2568	2616
hsa-miR-7974	DNAJB12	Miranda_RNAhybrid	-24.24	160	1836	1861	-31.6	0.293651	1825	1861
hsa-miR-7974	USP54	Miranda_RNAhybrid	-23.67	163	924	948	-27.4	0.458932	794	845
hsa-miR-7974	DUSP13	Miranda_RNAhybrid	-22.92	158	266	288	-33.5	0.047235	456	492
hsa-miR-7974	KCNMA1	Miranda_RNAhybrid	-23.41	157	4800	4821	-32.4	0.520955	7609	7640
hsa-miR-7974	RGR	Miranda_RNAhybrid	-22.75	151	173	198	-34.3	0.01085	33	64
hsa-miR-7974	GRID1	Miranda_RNAhybrid	-21.39	163	1631	1655	-30.2	0.420677	1670	1692
hsa-miR-7974	OPN4	Miranda_RNAhybrid	-22.48	158	120	142	-27.5	0.298198	121	142
hsa-miR-7974	IFIT1	Miranda_RNAhybrid	-22.12	157	534	557	-28.6	0.650228	531	557
hsa-miR-7974	ANKRD1	Miranda_RNAhybrid	-26.19	161	383	408	-32.5	0.041643	365	408
hsa-miR-7974	IDE	Miranda_RNAhybrid	-25.62	156	2117	2145	-31.8	0.255343	2117	2145
hsa-miR-7974	FFAR4	Miranda_RNAhybrid	-22.03	162	669	690	-32.3	0.191007	1120	1150
hsa-miR-7974	ENTPD1	Miranda_RNAhybrid	-22.93	159	7634	7656	-31.3	0.753723	7864	7892
hsa-miR-7974	FRAT1	Miranda_RNAhybrid	-26.5	157	1105	1126	-33.8	0.066006	280	311
hsa-miR-7974	ZFYVE27	Miranda_RNAhybrid	-29.24	159	1423	1446	-34	0.059841	1412	1446
hsa-miR-7974	COX15	Miranda_RNAhybrid	-25.42	175	1452	1476	-34.6	0.206624	1448	1476
hsa-miR-7974	SCD	Miranda_RNAhybrid	-21.79	152	1880	1899	-29.1	0.702674	1223	1253
hsa-miR-7974	SEC31B	Miranda_RNAhybrid	-30.49	160	687	708	-35	0.019542	675	709
hsa-miR-7974	TLX1	Miranda_RNAhybrid	-24.89	166	94	119	-33.7	0.041818	91	119
hsa-miR-7974	PITX3	Miranda_RNAhybrid	-30.66	153	26	52	-35.1	0.00291	27	53
hsa-miR-7974	WBP1L	Miranda_RNAhybrid	-27.66	171	2279	2302	-35.2	0.079589	2278	2302
hsa-miR-7974	CALHM1	Miranda_RNAhybrid	-20.83	152	506	530	-35.8	0.036318	888	923
hsa-miR-7974	SH3PXD2A	Miranda_RNAhybrid	-25.86	158	1644	1667	-31.4	0.6313	1644	1667
hsa-miR-7974	COL17A1	Miranda_RNAhybrid	-20.2	159	97	119	-27.5	0.39592	72	119
hsa-miR-7974	GSTO2	Miranda_RNAhybrid	-22.62	154	2655	2676	-35.5	0.139042	1727	1751
hsa-miR-7974	ITPRIP	Miranda_RNAhybrid	-21.68	160	3850	3875	-30.4	0.589749	1163	1184
hsa-miR-7974	HABP2	Miranda_RNAhybrid	-20.94	152	997	1019	-31.6	0.113103	36	67
hsa-miR-7974	GFRA1	Miranda_RNAhybrid	-22.84	164	4803	4825	-32.3	0.495858	5974	6010
hsa-miR-7974	HSPA12A	Miranda_RNAhybrid	-21.28	159	1309	1332	-29.2	0.659071	2626	2657
hsa-miR-7974	KIAA1598	Miranda_RNAhybrid	-22.89	156	2742	2765	-30.9	0.365834	2734	2766
hsa-miR-7974	ACADSB	Miranda_RNAhybrid	-23	157	1686	1707	-33.4	0.240444	1919	1947
hsa-miR-7974	CHST15	Miranda_RNAhybrid	-24	155	1543	1566	-31	0.301197	1479	1508
hsa-miR-7974	FAM53B	Miranda_RNAhybrid	-29.48	162	2035	2057	-38.7	0.030601	19	48
hsa-miR-7974	BCCIP	Miranda_RNAhybrid	-22.58	161	961	984	-35.3	0.03076	946	984
hsa-miR-7974	MGMT	Miranda_RNAhybrid	-28.29	158	256	278	-32.5	0.022885	256	278
hsa-miR-7974	DPYSL4	Miranda_RNAhybrid	-22.11	155	546	569	-31.2	0.082309	537	569
hsa-miR-7974	MTG1	Miranda_RNAhybrid	-24.3	158	118	141	-29	0.10635	119	142
hsa-miR-7974	SPRN	Miranda_RNAhybrid	-24.5	165	519	546	-33.9	0.110685	1553	1590
hsa-miR-7974	LOC100996637	Miranda_RNAhybrid	-21.17	159	259	281	-34.2	0.009912	7	31
hsa-miR-7974	KIDINS220	Miranda_RNAhybrid	-26.58	163	442	464	-40.4	0.00546	437	465
hsa-miR-552-3p	CNTLN	Miranda_RNAhybrid	-24.22	166	1108	1128	-28.3	0.152154	1110	1129
hsa-miR-552-3p	PCSK5	Miranda_RNAhybrid	-22.63	157	2538	2558	-25.8	0.807699	2538	2559
hsa-miR-552-3p	GCNT1	Miranda_RNAhybrid	-23.36	151	2723	2747	-27.6	0.562485	2726	2747
hsa-miR-552-3p	TLE1	Miranda_RNAhybrid	-20.17	155	165	185	-26.1	0.130858	160	185
hsa-miR-552-3p	STX17	Miranda_RNAhybrid	-20.04	155	5450	5470	-27.7	0.714591	5450	5470
hsa-miR-552-3p	RNF20	Miranda_RNAhybrid	-20.8	159	74	93	-25.3	0.375408	77	93
hsa-miR-552-3p	TMEM38B	Miranda_RNAhybrid	-22.9	169	1957	1978	-26.4	0.601722	1959	1978
hsa-miR-552-3p	ZNF462	Miranda_RNAhybrid	-22.66	167	503	523	-25.6	0.682954	511	524
hsa-miR-552-3p	FKBP15	Miranda_RNAhybrid	-26.47	173	254	274	-31.2	0.010867	259	274
hsa-miR-552-3p	NR6A1	Miranda_RNAhybrid	-20.06	163	1136	1156	-25.1	0.968984	1141	1156
hsa-miR-552-3p	ODF2	Miranda_RNAhybrid	-24	164	190	211	-27.2	0.193179	193	212
hsa-miR-552-3p	AIF1L	Miranda_RNAhybrid	-20.95	159	646	664	-26.7	0.596968	648	664
hsa-miR-552-3p	AHRR	Miranda_RNAhybrid	-23.69	163	1966	1986	-27.9	0.48552	1966	1986
hsa-miR-552-3p	MYO10	Miranda_RNAhybrid	-21.97	170	1173	1194	-26.1	0.867351	1174	1194
hsa-miR-552-3p	MAP1B	Miranda_RNAhybrid	-22.75	166	3586	3606	-26.1	0.840103	3588	3606
hsa-miR-552-3p	CAST	Miranda_RNAhybrid	-22.46	165	184	205	-26.9	0.442253	186	205
hsa-miR-552-3p	DCP2	Miranda_RNAhybrid	-20.76	151	5418	5438	-27.9	0.815262	21	45
hsa-miR-552-3p	DTWD2	Miranda_RNAhybrid	-24.92	163	2328	2348	-28.3	0.484091	2328	2349
hsa-miR-552-3p	CAMK2A	Miranda_RNAhybrid	-21.99	159	971	991	-27.6	0.501046	958	991
hsa-miR-552-3p	SGCD	Miranda_RNAhybrid	-20.25	156	5552	5570	-25	0.994999	5552	5571
hsa-miR-552-3p	GABRB2	Miranda_RNAhybrid	-20.68	154	1798	1821	-25.6	0.946044	1803	1821
hsa-miR-552-3p	CHD5	Miranda_RNAhybrid	-20.74	156	518	541	-25.9	0.818014	521	541
hsa-miR-552-3p	THAP3	Miranda_RNAhybrid	-22.94	160	433	453	-27.7	0.238307	433	453
hsa-miR-552-3p	ERRFI1	Miranda_RNAhybrid	-20.91	154	663	687	-25.9	0.470049	663	687
hsa-miR-552-3p	ENO1	Miranda_RNAhybrid	-22.77	157	13	33	-26.1	0.077535	14	34
hsa-miR-552-3p	WASF2	Miranda_RNAhybrid	-22.03	159	954	977	-26.3	0.785223	957	977
hsa-miR-552-3p	GJA4	Miranda_RNAhybrid	-21.99	163	328	348	-26.6	0.107799	328	348
hsa-miR-552-3p	CAP1	Miranda_RNAhybrid	-20.48	158	785	805	-25.9	0.359791	783	805
hsa-miR-552-3p	RIMKLA	Miranda_RNAhybrid	-21.48	165	1028	1051	-25.8	0.984431	1030	1051
hsa-miR-552-3p	SZT2	Miranda_RNAhybrid	-20.71	159	1599	1619	-25.4	0.885099	2263	2290
hsa-miR-552-3p	EIF2B3	Miranda_RNAhybrid	-24.08	152	46	67	-26.6	0.078036	47	68
hsa-miR-552-3p	TOE1	Miranda_RNAhybrid	-26.24	169	169	188	-30.2	0.005092	170	188
hsa-miR-552-3p	CYP4A11	Miranda_RNAhybrid	-23.75	167	834	854	-27.4	0.156746	834	854
hsa-miR-552-3p	INADL	Miranda_RNAhybrid	-21.22	157	308	328	-27.2	0.536479	303	329
hsa-miR-552-3p	RBMXL1	Miranda_RNAhybrid	-23.76	168	1989	2009	-29.7	0.240923	1985	2010
hsa-miR-552-3p	KIAA1324	Miranda_RNAhybrid	-20.66	152	2824	2845	-26.8	0.691984	2790	2809
hsa-miR-552-3p	S100A14	Miranda_RNAhybrid	-21.29	159	84	103	-26.1	0.171338	81	103
hsa-miR-552-3p	SMG5	Miranda_RNAhybrid	-20.7	157	59	78	-26.7	0.322332	64	78
hsa-miR-552-3p	FCRL5	Miranda_RNAhybrid	-22.97	161	160	180	-26.1	0.617702	139	181
hsa-miR-552-3p	POGK	Miranda_RNAhybrid	-21.24	158	1179	1200	-25.8	0.585932	1178	1200
hsa-miR-552-3p	TBX19	Miranda_RNAhybrid	-21.31	161	1110	1131	-27.2	0.276592	1104	1131
hsa-miR-552-3p	KIAA0040	Miranda_RNAhybrid	-24.06	170	689	709	-28.1	0.483655	691	709
hsa-miR-552-3p	LHX9	Miranda_RNAhybrid	-20.85	161	1580	1600	-27.7	0.522273	1567	1600
hsa-miR-552-3p	LEMD1	Miranda_RNAhybrid	-26.9	179	171	191	-32	0.001897	171	191
hsa-miR-552-3p	CD34	Miranda_RNAhybrid	-20.09	156	1139	1160	-25.4	0.573333	1133	1160
hsa-miR-552-3p	LOC100506571	Miranda_RNAhybrid	-21.21	159	157	175	-26.2	0.502101	159	176
hsa-miR-552-3p	C1orf229	Miranda_RNAhybrid	-20.54	155	742	762	-26.3	0.372494	739	762
hsa-miR-552-3p	STAM	Miranda_RNAhybrid	-24.07	171	1588	1608	-30.2	0.118711	1588	1608
hsa-miR-552-3p	ZMIZ1	Miranda_RNAhybrid	-20.52	157	3280	3302	-25.6	0.862618	3280	3302
hsa-miR-552-3p	SNCG	Miranda_RNAhybrid	-20.01	156	186	207	-25.8	0.077817	173	207
hsa-miR-6130	BNC2	Miranda_RNAhybrid	-20.63	155	9013	9032	-27.3	0.842506	8304	8320
hsa-miR-6130	ADAMTSL1	Miranda_RNAhybrid	-20.24	155	1195	1215	-25.2	0.686445	1186	1215
hsa-miR-6130	SLC24A2	Miranda_RNAhybrid	-22.69	151	2700	2719	-25.8	0.958575	2698	2720
hsa-miR-6130	KIF24	Miranda_RNAhybrid	-25.35	151	1315	1332	-27.3	0.294423	179	198
hsa-miR-6130	KIAA1045	Miranda_RNAhybrid	-20.88	158	31	48	-26.1	0.770458	4225	4244
hsa-miR-6130	SIT1	Miranda_RNAhybrid	-23.19	151	287	305	-26.9	0.068501	294	306
hsa-miR-6130	PAX5	Miranda_RNAhybrid	-20.95	151	906	924	-26.9	0.817612	5764	5788
hsa-miR-6130	PRKACG	Miranda_RNAhybrid	-20.76	156	174	192	-25.6	0.119435	174	193
hsa-miR-6130	CDK20	Miranda_RNAhybrid	-25.23	162	742	759	-28.8	0.065167	744	760
hsa-miR-6130	BICD2	Miranda_RNAhybrid	-22.9	150	333	352	-27.1	0.550871	337	353
hsa-miR-6130	SNX30	Miranda_RNAhybrid	-22.3	154	2204	2221	-26.5	0.81933	2206	2221
hsa-miR-6130	MEGF9	Miranda_RNAhybrid	-20.51	158	1281	1297	-25.5	0.842564	1282	1298
hsa-miR-6130	MVB12B	Miranda_RNAhybrid	-22.6	156	355	373	-27	0.565587	355	373
hsa-miR-6130	STXBP1	Miranda_RNAhybrid	-21.05	157	1677	1695	-25.3	0.585225	1672	1696
hsa-miR-6130	PTGES	Miranda_RNAhybrid	-20.82	153	298	314	-25.1	0.441572	300	314
hsa-miR-6130	USP20	Miranda_RNAhybrid	-20.65	153	1355	1374	-25.6	0.443084	1359	1374
hsa-miR-6130	GPR107	Miranda_RNAhybrid	-20.59	151	3274	3293	-25.8	0.852147	1955	1970
hsa-miR-6130	AIF1L	Miranda_RNAhybrid	-20.01	154	191	209	-27.2	0.424187	192	209
hsa-miR-6130	GBGT1	Miranda_RNAhybrid	-20.9	150	504	525	-25.5	0.168386	506	526
hsa-miR-6130	SAPCD2	Miranda_RNAhybrid	-20.93	151	877	896	-26.9	0.427465	949	968
hsa-miR-6130	TOR4A	Miranda_RNAhybrid	-21.49	150	193	214	-25.1	0.745371	198	214
hsa-miR-6130	NSMF	Miranda_RNAhybrid	-26.54	163	25	43	-28.7	0.14706	25	43
hsa-miR-6130	TPPP	Miranda_RNAhybrid	-21.25	151	1168	1187	-26.2	0.810982	1427	1445
hsa-miR-6130	NPR3	Miranda_RNAhybrid	-25.79	156	3017	3038	-29.1	0.384515	3016	3039
hsa-miR-6130	MCTP1	Miranda_RNAhybrid	-27.42	167	590	607	-31	0.1309	590	608
hsa-miR-6130	NREP	Miranda_RNAhybrid	-20.3	155	1390	1408	-26.2	0.365903	1387	1408
hsa-miR-6130	ETF1	Miranda_RNAhybrid	-24.51	164	573	592	-26.3	0.467991	576	593
hsa-miR-6130	PPARGC1B	Miranda_RNAhybrid	-22.77	158	1213	1232	-26.3	0.893949	1214	1233
hsa-miR-6130	FAT2	Miranda_RNAhybrid	-23.74	157	1228	1245	-27	0.239806	1231	1245
hsa-miR-6130	UBTD2	Miranda_RNAhybrid	-21.83	155	1201	1220	-25.4	0.613283	1203	1221
hsa-miR-6130	RNF44	Miranda_RNAhybrid	-27.79	158	307	325	-32.3	0.039566	303	326
hsa-miR-6130	PDLIM7	Miranda_RNAhybrid	-21.45	159	154	172	-25.4	0.043447	161	172
hsa-miR-6130	ADAMTS2	Miranda_RNAhybrid	-24.75	168	2832	2851	-28.2	0.313256	2833	2851
hsa-miR-6130	CNOT6	Miranda_RNAhybrid	-22.21	160	385	403	-25.6	0.821141	386	403
hsa-miR-6130	VWA1	Miranda_RNAhybrid	-26.39	157	1383	1400	-28.5	0.286692	1386	1401
hsa-miR-6130	SLC35E2B	Miranda_RNAhybrid	-24.46	161	2697	2715	-28.8	0.350852	2696	2715
hsa-miR-6130	SLC35E2	Miranda_RNAhybrid	-24.46	161	3460	3478	-28.8	0.404497	3459	3478
hsa-miR-6130	TMEM201	Miranda_RNAhybrid	-23.74	156	1184	1202	-28.4	0.256587	1186	1203
hsa-miR-6130	NECAP2	Miranda_RNAhybrid	-20.52	150	30	48	-25	0.433377	606	629
hsa-miR-6130	PLA2G2D	Miranda_RNAhybrid	-21.36	152	820	838	-26.6	0.281682	818	838
hsa-miR-6130	ECE1	Miranda_RNAhybrid	-21.14	159	480	498	-25.1	0.749233	484	498
hsa-miR-6130	LDLRAD2	Miranda_RNAhybrid	-21.89	160	1564	1582	-26.1	0.623887	1564	1582
hsa-miR-6130	HSPG2	Miranda_RNAhybrid	-23.62	151	644	661	-27.7	0.118226	645	662
hsa-miR-6130	C1QC	Miranda_RNAhybrid	-23.82	151	26	45	-27.1	0.026247	28	46
hsa-miR-6130	LUZP1	Miranda_RNAhybrid	-20.28	150	3903	3922	-25	0.927223	217	238
hsa-miR-6130	C1orf172	Miranda_RNAhybrid	-21.51	161	335	353	-26.1	0.092004	334	353
hsa-miR-6130	WDTC1	Miranda_RNAhybrid	-25.69	160	1214	1232	-28.2	0.231799	1220	1233
hsa-miR-6130	GMEB1	Miranda_RNAhybrid	-23.66	155	145	163	-28.6	0.053189	140	164
hsa-miR-6130	SDC3	Miranda_RNAhybrid	-20.49	155	3381	3400	-25.6	0.787189	3383	3400
hsa-miR-6130	KPNA6	Miranda_RNAhybrid	-21.17	150	685	702	-25.1	0.944875	684	702
hsa-miR-6130	GJB3	Miranda_RNAhybrid	-24.19	161	618	637	-27.7	0.077605	622	638
hsa-miR-6130	ZMYM4	Miranda_RNAhybrid	-29.9	163	1277	1297	-31.7	0.05019	1276	1298
hsa-miR-6130	EVA1B	Miranda_RNAhybrid	-21.48	155	191	209	-31.2	0.001629	186	209
hsa-miR-6130	RIMS3	Miranda_RNAhybrid	-21.01	151	4425	4445	-25	0.955262	3628	3648
hsa-miR-6130	KCNQ4	Miranda_RNAhybrid	-21.67	158	87	105	-27.1	0.30711	83	106
hsa-miR-6130	C1orf210	Miranda_RNAhybrid	-20.98	155	14	32	-25.4	0.274565	21	32
hsa-miR-6130	ERI3	Miranda_RNAhybrid	-21.72	152	51	69	-26	0.091588	50	70
hsa-miR-6130	PTCH2	Miranda_RNAhybrid	-21.13	152	515	533	-27.7	0.085586	90	107
hsa-miR-6130	HECTD3	Miranda_RNAhybrid	-20.52	155	859	876	-25.4	0.288974	860	877
hsa-miR-6130	PIK3R3	Miranda_RNAhybrid	-22.14	159	2847	2866	-26	0.70379	2849	2866
hsa-miR-6130	RAB3B	Miranda_RNAhybrid	-21.53	155	1431	1451	-28.3	0.782176	1433	1451
hsa-miR-6130	C1orf123	Miranda_RNAhybrid	-21.11	154	210	227	-26.7	0.078104	212	227
hsa-miR-6130	TCEANC2	Miranda_RNAhybrid	-25.55	168	1997	2016	-28.8	0.2699	1997	2016
hsa-miR-6130	GBP2	Miranda_RNAhybrid	-20.64	154	19	38	-26.2	0.452791	19	38
hsa-miR-6130	SLC6A17	Miranda_RNAhybrid	-20.32	164	943	961	-25.3	0.830739	945	961
hsa-miR-6130	KCND3	Miranda_RNAhybrid	-21.97	158	67	85	-25.6	0.037344	74	85
hsa-miR-6130	CD58	Miranda_RNAhybrid	-24.49	177	372	390	-27.9	0.037778	373	390
hsa-miR-6130	OTUD7B	Miranda_RNAhybrid	-23.8	163	3342	3361	-27.7	0.431151	3344	3361
hsa-miR-6130	TARS2	Miranda_RNAhybrid	-20.92	152	33	52	-25.7	0.125404	28	53
hsa-miR-6130	PRUNE	Miranda_RNAhybrid	-21.53	156	1152	1170	-27.1	0.230851	1154	1170
hsa-miR-6130	CDC42SE1	Miranda_RNAhybrid	-20.86	156	156	174	-25.2	0.681591	162	174
hsa-miR-6130	SNX27	Miranda_RNAhybrid	-23.4	156	1309	1331	-26.2	0.824634	1310	1332
hsa-miR-6130	THEM4	Miranda_RNAhybrid	-22.04	160	58	76	-27.7	0.479578	60	77
hsa-miR-6130	NPR1	Miranda_RNAhybrid	-22.26	152	311	329	-26.1	0.111278	312	330
hsa-miR-6130	PYGO2	Miranda_RNAhybrid	-20.18	158	1632	1650	-27.4	0.24577	1631	1650
hsa-miR-6130	SEMA4A	Miranda_RNAhybrid	-21.57	158	475	493	-29.9	0.023573	471	493
hsa-miR-6130	MEF2D	Miranda_RNAhybrid	-21.48	159	3069	3087	-25.8	0.773365	3076	3087
hsa-miR-6130	SH2D2A	Miranda_RNAhybrid	-20.5	150	51	69	-25.5	0.066642	49	69
hsa-miR-6130	CD5L	Miranda_RNAhybrid	-21.94	151	99	117	-25.2	0.352014	106	118
hsa-miR-6130	KCNJ10	Miranda_RNAhybrid	-23.22	160	100	118	-27.5	0.501117	106	118
hsa-miR-6130	CD84	Miranda_RNAhybrid	-26.49	160	6352	6371	-28.3	0.60347	6355	6372
hsa-miR-6130	B4GALT3	Miranda_RNAhybrid	-21.89	153	123	141	-25.4	0.131528	123	142
hsa-miR-6130	PBX1	Miranda_RNAhybrid	-20.95	158	2986	3006	-25.5	0.891755	2989	3006
hsa-miR-6130	ILDR2	Miranda_RNAhybrid	-26.37	159	5321	5340	-30.5	0.26488	5323	5341
hsa-miR-6130	NR5A2	Miranda_RNAhybrid	-20.83	164	471	491	-25.2	0.794572	472	491
hsa-miR-6130	PPFIA4	Miranda_RNAhybrid	-20.95	153	1369	1387	-25	0.71089	1166	1181
hsa-miR-6130	IKBKE	Miranda_RNAhybrid	-21.55	155	329	347	-28.8	0.040772	325	347
hsa-miR-6130	MAPKAPK2	Miranda_RNAhybrid	-21.43	152	2008	2026	-25.8	0.546627	2002	2027
hsa-miR-6130	PLXNA2	Miranda_RNAhybrid	-22.93	161	4467	4485	-28.2	0.485044	4467	4485
hsa-miR-6130	TATDN3	Miranda_RNAhybrid	-20.82	154	467	485	-25.7	0.452577	468	486
hsa-miR-6130	ENAH	Miranda_RNAhybrid	-23.11	157	10823	10840	-26	0.972371	1512	1531
hsa-miR-6130	RNF187	Miranda_RNAhybrid	-20.84	156	2068	2088	-26	0.532835	1986	2002
hsa-miR-6130	ERO1LB	Miranda_RNAhybrid	-24.65	155	1809	1827	-27.7	0.417579	1816	1828
hsa-miR-6130	AKR1C2	Miranda_RNAhybrid	-20.11	151	478	500	-25.7	0.568624	480	500
hsa-miR-6130	CELF2	Miranda_RNAhybrid	-20.41	153	5623	5641	-27.7	0.718707	6071	6095
hsa-miR-6130	DHTKD1	Miranda_RNAhybrid	-21.96	159	1835	1853	-26.2	0.50627	373	386
hsa-miR-6130	MCU	Miranda_RNAhybrid	-21.7	155	778	798	-26	0.450156	780	798
hsa-miR-6130	SCD	Miranda_RNAhybrid	-20.32	151	2972	2990	-25.2	0.854479	1665	1687
hsa-miR-6130	HIF1AN	Miranda_RNAhybrid	-21.51	158	3280	3297	-25.7	0.897589	3282	3297
hsa-miR-6130	SFXN3	Miranda_RNAhybrid	-21.11	155	10	28	-25.7	0.44949	9	29
hsa-miR-6130	GSTO2	Miranda_RNAhybrid	-20.18	159	3463	3481	-25	0.942319	3467	3481
hsa-miR-6130	GFRA1	Miranda_RNAhybrid	-21.92	160	4291	4309	-27.2	0.784823	4297	4309
hsa-miR-6130	GPR123	Miranda_RNAhybrid	-20.75	151	1083	1103	-25.1	0.661458	1081	1103
hsa-miR-3660	DOCK8	Miranda_RNAhybrid	-22.96	154	853	874	-25.2	0.428997	855	874
hsa-miR-3660	RFX3	Miranda_RNAhybrid	-20.46	160	4959	4979	-25	0.986529	4965	4979
hsa-miR-3660	C9orf170	Miranda_RNAhybrid	-20.32	158	2566	2589	-25.1	0.849993	2564	2589
hsa-miR-3660	PPP3R2	Miranda_RNAhybrid	-22.26	158	2700	2721	-33.4	0.042467	2694	2722
hsa-miR-3660	EPB41L4B	Miranda_RNAhybrid	-22.47	156	2040	2064	-27.5	0.427776	2045	2065
hsa-miR-3660	DAB2IP	Miranda_RNAhybrid	-22.98	158	2606	2630	-27.5	0.487842	2606	2631
hsa-miR-3660	GARNL3	Miranda_RNAhybrid	-25.3	157	80	106	-28.3	0.016151	80	107
hsa-miR-3660	C9orf114	Miranda_RNAhybrid	-21.84	156	2807	2826	-27.3	0.524082	2813	2826
hsa-miR-3660	SH3GLB2	Miranda_RNAhybrid	-22.66	159	647	667	-26.8	0.183158	647	667
hsa-miR-3660	USP20	Miranda_RNAhybrid	-23.26	164	466	487	-26.6	0.375321	469	487
hsa-miR-3660	NDOR1	Miranda_RNAhybrid	-23.25	153	1425	1448	-27.3	0.507529	1431	1449
hsa-miR-3660	EHMT1	Miranda_RNAhybrid	-21.79	160	493	513	-30.1	0.058144	489	513
hsa-miR-3660	PLEKHG4B	Miranda_RNAhybrid	-21.95	159	5575	5595	-25.1	0.990042	5575	5595
hsa-miR-3660	ADAMTS16	Miranda_RNAhybrid	-27.13	169	195	214	-29.5	0.07592	195	214
hsa-miR-3660	ANKRD33B	Miranda_RNAhybrid	-20.5	155	3806	3826	-25.6	0.977112	4015	4036
hsa-miR-3660	ANKRA2	Miranda_RNAhybrid	-24.14	174	443	464	-25.7	0.187821	443	465
hsa-miR-3660	VCAN	Miranda_RNAhybrid	-21.59	154	485	508	-26	0.536217	485	508
hsa-miR-3660	ST8SIA4	Miranda_RNAhybrid	-22.12	165	297	319	-26	0.87936	296	319
hsa-miR-3660	G3BP1	Miranda_RNAhybrid	-21.61	150	6986	7006	-25.8	0.963185	6990	7007
hsa-miR-3660	GEMIN5	Miranda_RNAhybrid	-26.92	166	537	558	-31.4	0.01706	536	558
hsa-miR-3660	GABRP	Miranda_RNAhybrid	-21.8	161	1436	1456	-26.2	0.485989	1421	1456
hsa-miR-3660	ZNF354A	Miranda_RNAhybrid	-24.17	165	164	186	-28.5	0.040214	165	186
hsa-miR-3660	SNIP1	Miranda_RNAhybrid	-21.23	153	1274	1293	-25.6	0.817055	1280	1294
hsa-miR-3660	BMP8A	Miranda_RNAhybrid	-20.41	153	118	137	-26.7	0.727473	113	137
hsa-miR-3660	SMAP2	Miranda_RNAhybrid	-20.58	155	316	336	-27.9	0.168876	313	336
hsa-miR-3660	SZT2	Miranda_RNAhybrid	-21.97	164	1186	1205	-26.2	0.77535	1188	1205
hsa-miR-3660	RAB3B	Miranda_RNAhybrid	-22.89	162	1407	1427	-27.5	0.924545	1413	1427
hsa-miR-3660	MRPL37	Miranda_RNAhybrid	-21.69	155	709	730	-25.1	0.537531	711	731
hsa-miR-3660	LPAR3	Miranda_RNAhybrid	-23.92	158	237	262	-28.4	0.270112	238	263
hsa-miR-3660	GBP5	Miranda_RNAhybrid	-21.43	155	457	477	-26.5	0.431738	459	477
hsa-miR-3660	GSTM5	Miranda_RNAhybrid	-23.09	165	255	276	-28	0.099453	260	277
hsa-miR-3660	KCNC4	Miranda_RNAhybrid	-21.71	162	1103	1124	-25.7	0.557793	1104	1124
hsa-miR-3660	CGN	Miranda_RNAhybrid	-21.08	158	582	601	-26.6	0.323618	583	602
hsa-miR-3660	ZBTB7B	Miranda_RNAhybrid	-20.47	156	1171	1190	-25.1	0.682254	1170	1190
hsa-miR-3660	PRCC	Miranda_RNAhybrid	-21.05	161	248	267	-26.3	0.066688	253	267
hsa-miR-3660	CRP	Miranda_RNAhybrid	-23.37	158	856	876	-26	0.374806	859	876
hsa-miR-3660	COLGALT2	Miranda_RNAhybrid	-20.71	163	2233	2253	-25.1	0.847331	2238	2253
hsa-miR-3660	CSRP1	Miranda_RNAhybrid	-20.16	158	78	99	-25.2	0.481224	78	99
hsa-miR-3660	ELK4	Miranda_RNAhybrid	-23.84	150	7707	7734	-27	0.903995	7708	7734
hsa-miR-3660	C1orf116	Miranda_RNAhybrid	-22.58	163	3074	3094	-25.7	0.816251	3074	3095
hsa-miR-3660	LPGAT1	Miranda_RNAhybrid	-23.66	162	1113	1134	-27.5	0.767824	1112	1134
hsa-miR-3660	GALNT2	Miranda_RNAhybrid	-22.9	164	2002	2022	-26.7	0.564947	2008	2022
hsa-miR-3660	AKR1E2	Miranda_RNAhybrid	-21.96	166	93	114	-26.8	0.152005	94	114
hsa-miR-3660	TMEM236	Miranda_RNAhybrid	-23.28	156	370	389	-27.3	0.65935	376	389
hsa-miR-3660	ERCC6	Miranda_RNAhybrid	-20.47	160	1419	1438	-28.7	0.442967	1411	1438
hsa-miR-3660	C10orf54	Miranda_RNAhybrid	-28.87	175	456	476	-32.3	0.096833	455	476
hsa-miR-3660	ANXA11	Miranda_RNAhybrid	-21.9	152	602	621	-27.3	0.114246	600	622
hsa-miR-3660	LCOR	Miranda_RNAhybrid	-20.77	167	6731	6751	-26.1	0.965384	6730	6751
hsa-miR-3660	VTI1A	Miranda_RNAhybrid	-20.17	158	1646	1664	-26	0.765685	1635	1664
hsa-miR-3660	ECHS1	Miranda_RNAhybrid	-23.62	156	39	58	-26.4	0.071144	41	59
hsa-miR-3660	GEN1	Miranda_RNAhybrid	-22.98	161	3053	3072	-28.1	0.444192	3058	3072
hsa-miR-6782-5p	IFNA1	Miranda_RNAhybrid	-28.69	157	67	90	-34.7	0.00307	48	91
hsa-miR-6782-5p	LINGO2	Miranda_RNAhybrid	-20.96	150	1	13	-28.2	0.314086	616	636
hsa-miR-6782-5p	NFX1	Miranda_RNAhybrid	-25.67	164	1024	1046	-31.9	0.12683	873	901
hsa-miR-6782-5p	UBE2R2	Miranda_RNAhybrid	-24.49	159	2875	2898	-33.3	0.224711	1699	1720
hsa-miR-6782-5p	DCAF12	Miranda_RNAhybrid	-22.57	152	796	820	-30.5	0.357152	783	821
hsa-miR-6782-5p	FAM219A	Miranda_RNAhybrid	-26.1	150	1618	1642	-38.5	0.029511	88	110
hsa-miR-6782-5p	KIAA1045	Miranda_RNAhybrid	-23.68	151	374	400	-35	0.178827	362	400
hsa-miR-6782-5p	FAM214B	Miranda_RNAhybrid	-29.72	154	686	711	-34.9	0.034763	553	580
hsa-miR-6782-5p	LOC100996643	Miranda_RNAhybrid	-30.68	150	1561	1581	-34.3	0.112136	938	963
hsa-miR-6782-5p	FAM189A2	Miranda_RNAhybrid	-23.9	151	306	330	-28.6	0.227747	312	330
hsa-miR-6782-5p	PCSK5	Miranda_RNAhybrid	-27.52	154	530	556	-31.1	0.468195	525	557
hsa-miR-6782-5p	SPIN1	Miranda_RNAhybrid	-23.9	160	1113	1139	-38.9	0.033302	1131	1154
hsa-miR-6782-5p	LOC101929748	Miranda_RNAhybrid	-32.21	173	339	364	-34.8	0.065124	341	364
hsa-miR-6782-5p	WNK2	Miranda_RNAhybrid	-30.48	167	663	687	-35	0.044044	1062	1099
hsa-miR-6782-5p	HIATL1	Miranda_RNAhybrid	-26.58	150	39	65	-35	0.051222	30	66
hsa-miR-6782-5p	LOC158434	Miranda_RNAhybrid	-27.01	154	522	546	-32.4	0.20019	182	201
hsa-miR-6782-5p	CCDC180	Miranda_RNAhybrid	-35.88	178	87	111	-37.8	0.001899	79	112
hsa-miR-6782-5p	NCBP1	Miranda_RNAhybrid	-34.7	167	1461	1485	-36.6	0.054061	1477	1506
hsa-miR-6782-5p	GRIN3A	Miranda_RNAhybrid	-37.46	162	1575	1597	-40	0.02547	1576	1598
hsa-miR-6782-5p	SLC44A1	Miranda_RNAhybrid	-30.1	152	5056	5080	-35.5	0.272735	6112	6139
hsa-miR-6782-5p	ACTL7A	Miranda_RNAhybrid	-25.09	150	87	113	-30.9	0.005726	82	124
hsa-miR-6782-5p	IKBKAP	Miranda_RNAhybrid	-38.24	170	45	70	-38.2	0.015474	45	70
hsa-miR-6782-5p	ZNF618	Miranda_RNAhybrid	-24.36	156	1857	1882	-34.1	0.328949	1837	1882
hsa-miR-6782-5p	AKNA	Miranda_RNAhybrid	-30.11	157	742	766	-34.9	0.11788	731	767
hsa-miR-6782-5p	TNFSF15	Miranda_RNAhybrid	-32.82	159	4449	4474	-37.3	0.108873	4443	4474
hsa-miR-6782-5p	TNFSF8	Miranda_RNAhybrid	-36.56	165	593	616	-37.2	0.047871	593	617
hsa-miR-6782-5p	RAB14	Miranda_RNAhybrid	-25.53	152	831	855	-33.9	0.187138	815	855
hsa-miR-6782-5p	DAB2IP	Miranda_RNAhybrid	-37.33	164	1718	1738	-42.2	0.008188	1366	1391
hsa-miR-6782-5p	TTLL11	Miranda_RNAhybrid	-32.75	158	3809	3830	-38.2	0.099765	3986	4015
hsa-miR-6782-5p	LHX6	Miranda_RNAhybrid	-30.65	152	1104	1128	-39	0.017602	1096	1129
hsa-miR-6782-5p	OLFML2A	Miranda_RNAhybrid	-22.61	151	2101	2127	-36	0.128462	692	735
hsa-miR-6782-5p	ARPC5L	Miranda_RNAhybrid	-30.97	160	583	605	-34.1	0.030252	579	606
hsa-miR-6782-5p	GAPVD1	Miranda_RNAhybrid	-29.23	170	1805	1829	-33.3	0.161167	1782	1829
hsa-miR-6782-5p	MVB12B	Miranda_RNAhybrid	-28.44	151	3462	3486	-41.6	0.013892	3478	3502
hsa-miR-6782-5p	LMX1B	Miranda_RNAhybrid	-31.48	166	465	490	-35.9	0.136125	960	1002
hsa-miR-6782-5p	GOLGA2	Miranda_RNAhybrid	-30.42	160	650	676	-35.4	0.033428	668	690
hsa-miR-6782-5p	URM1	Miranda_RNAhybrid	-39.36	176	2417	2440	-46.4	0.002652	2413	2441
hsa-miR-6782-5p	GLE1	Miranda_RNAhybrid	-33.48	158	368	392	-39.2	0.006061	365	393
hsa-miR-6782-5p	SPTAN1	Miranda_RNAhybrid	-38.33	176	3	26	-40.5	0.000351	2	26
hsa-miR-6782-5p	SH3GLB2	Miranda_RNAhybrid	-31.04	175	155	179	-39.1	0.004206	109	134
hsa-miR-6782-5p	DOLPP1	Miranda_RNAhybrid	-31.26	168	1138	1163	-34.5	0.058281	677	713
hsa-miR-6782-5p	ASB6	Miranda_RNAhybrid	-36.4	167	2848	2871	-39.3	0.026098	2849	2872
hsa-miR-6782-5p	FNBP1	Miranda_RNAhybrid	-31.48	160	77	102	-38.9	0.03243	94	119
hsa-miR-6782-5p	GPR107	Miranda_RNAhybrid	-28.75	151	1344	1365	-38.6	0.059275	3956	3988
hsa-miR-6782-5p	NCS1	Miranda_RNAhybrid	-27.45	154	3480	3507	-37.7	0.068296	1783	1812
hsa-miR-6782-5p	ABL1	Miranda_RNAhybrid	-28.35	152	1465	1489	-40.3	0.009441	1444	1489
hsa-miR-6782-5p	LAMC3	Miranda_RNAhybrid	-27.52	158	209	233	-35.6	0.032006	201	234
hsa-miR-6782-5p	AIF1L	Miranda_RNAhybrid	-26.23	171	2168	2192	-32.8	0.237761	522	556
hsa-miR-6782-5p	CACFD1	Miranda_RNAhybrid	-37.09	153	1335	1365	-42.3	0.004506	611	646
hsa-miR-6782-5p	ADAMTSL2	Miranda_RNAhybrid	-27.43	150	202	226	-39.7	0.001959	190	227
hsa-miR-6782-5p	FAM163B	Miranda_RNAhybrid	-30.5	159	890	914	-36.5	0.040255	869	915
hsa-miR-6782-5p	RXRA	Miranda_RNAhybrid	-35.51	162	1841	1865	-36.9	0.082142	770	804
hsa-miR-6782-5p	C9orf62	Miranda_RNAhybrid	-26.21	153	1054	1079	-37.9	0.013166	544	577
hsa-miR-6782-5p	LCN1	Miranda_RNAhybrid	-29	160	71	95	-34.9	0.00185	49	96
hsa-miR-6782-5p	NACC2	Miranda_RNAhybrid	-34.47	157	1844	1865	-40.8	0.026616	2417	2448
hsa-miR-6782-5p	GPSM1	Miranda_RNAhybrid	-23.44	155	446	470	-40	0.00605	23	43
hsa-miR-6782-5p	LCN8	Miranda_RNAhybrid	-31.42	156	23	49	-36.5	0.000215	32	55
hsa-miR-6782-5p	ENTPD2	Miranda_RNAhybrid	-43.42	184	88	110	-44.7	0.000157	88	110
hsa-miR-6782-5p	SSNA1	Miranda_RNAhybrid	-27.84	153	394	416	-31.3	0.045153	300	331
hsa-miR-6782-5p	TPRN	Miranda_RNAhybrid	-32.1	173	97	122	-35.4	0.008162	96	122
hsa-miR-6782-5p	NDOR1	Miranda_RNAhybrid	-32.86	164	1367	1389	-37	0.055642	1302	1330
hsa-miR-6782-5p	RNF224	Miranda_RNAhybrid	-34.53	165	1	22	-34.3	0.015919	14	52
hsa-miR-6782-5p	TOR4A	Miranda_RNAhybrid	-32.31	161	472	497	-36.2	0.067749	469	497
hsa-miR-6782-5p	NRARP	Miranda_RNAhybrid	-27.1	162	1431	1455	-41.7	0.005198	843	871
hsa-miR-6782-5p	LOC101928853	Miranda_RNAhybrid	-39.7	183	570	594	-41.3	0.001421	571	594
hsa-miR-6782-5p	PLEKHG4B	Miranda_RNAhybrid	-28.95	152	7336	7358	-41.4	0.036246	5141	5176
hsa-miR-6782-5p	TERT	Miranda_RNAhybrid	-31.06	154	321	351	-33	0.029683	300	351
hsa-miR-6782-5p	MED10	Miranda_RNAhybrid	-25.85	152	98	118	-36.4	0.006759	99	126
hsa-miR-6782-5p	NSUN2	Miranda_RNAhybrid	-25.61	153	9	33	-32	0.060437	4	33
hsa-miR-6782-5p	PAPD7	Miranda_RNAhybrid	-31.87	165	10	34	-42.2	0.004769	2	34
hsa-miR-6782-5p	SEMA5A	Miranda_RNAhybrid	-21.63	159	5776	5801	-33.5	0.455758	3452	3485
hsa-miR-6782-5p	MYO10	Miranda_RNAhybrid	-39.52	167	2783	2804	-41.5	0.019664	2784	2805
hsa-miR-6782-5p	GOLPH3	Miranda_RNAhybrid	-33.42	164	676	700	-36	0.034013	676	701
hsa-miR-6782-5p	UGT3A1	Miranda_RNAhybrid	-31.48	161	57	80	-38.6	0.007591	29	80
hsa-miR-6782-5p	MAP1B	Miranda_RNAhybrid	-27.58	162	1573	1597	-33.7	0.265715	1567	1597
hsa-miR-6782-5p	IQGAP2	Miranda_RNAhybrid	-30.67	156	664	688	-34.3	0.029259	664	688
hsa-miR-6782-5p	ARSB	Miranda_RNAhybrid	-30.73	160	488	510	-40.4	0.017562	755	807
hsa-miR-6782-5p	RHOBTB3	Miranda_RNAhybrid	-23.96	157	2198	2224	-28.3	0.818224	896	921
hsa-miR-6782-5p	EFNA5	Miranda_RNAhybrid	-38.6	187	220	244	-41.9	0.01509	221	244
hsa-miR-6782-5p	GRAMD3	Miranda_RNAhybrid	-30.96	164	349	376	-35.2	0.034923	348	376
hsa-miR-6782-5p	PDLIM4	Miranda_RNAhybrid	-32.23	164	810	840	-40.1	0.004783	807	840
hsa-miR-6782-5p	SLC22A5	Miranda_RNAhybrid	-32.07	174	373	396	-42.6	0.001982	357	396
hsa-miR-6782-5p	IL13	Miranda_RNAhybrid	-27.14	159	243	270	-35.2	0.020252	240	270
hsa-miR-6782-5p	2018-09-08	Miranda_RNAhybrid	-28.63	150	172	199	-34.3	0.14056	163	199
hsa-miR-6782-5p	FSTL4	Miranda_RNAhybrid	-25.45	154	1771	1799	-33.4	0.180266	1637	1661
hsa-miR-6782-5p	TCF7	Miranda_RNAhybrid	-24.13	175	1778	1802	-31.8	0.236879	1776	1802
hsa-miR-6782-5p	JADE2	Miranda_RNAhybrid	-29.89	167	1709	1734	-36.2	0.103442	1135	1166
hsa-miR-6782-5p	H2AFY	Miranda_RNAhybrid	-32.36	174	1647	1671	-37.4	0.033876	1642	1672
hsa-miR-6782-5p	C5orf20	Miranda_RNAhybrid	-30.34	161	1753	1777	-37.2	0.034816	1348	1368
hsa-miR-6782-5p	CTNNA1	Miranda_RNAhybrid	-33.54	160	6	30	-39.1	0.004752	2	30
hsa-miR-6782-5p	TMEM173	Miranda_RNAhybrid	-26.58	159	670	692	-36.4	0.010026	589	614
hsa-miR-6782-5p	PCDH1	Miranda_RNAhybrid	-27.7	157	64	86	-32.6	0.073281	44	86
hsa-miR-6782-5p	SH3TC2	Miranda_RNAhybrid	-26.16	154	13044	13069	-35.9	0.510352	14206	14233
hsa-miR-6782-5p	GRPEL2	Miranda_RNAhybrid	-29.98	151	554	579	-31.7	0.385963	1057	1082
hsa-miR-6782-5p	HMGXB3	Miranda_RNAhybrid	-38.4	173	373	399	-42	0.001411	374	400
hsa-miR-6782-5p	CSF1R	Miranda_RNAhybrid	-29.31	155	536	557	-33.1	0.045165	526	557
hsa-miR-6782-5p	SLC6A7	Miranda_RNAhybrid	-23.6	154	380	404	-34.2	0.067137	543	576
hsa-miR-6782-5p	DCTN4	Miranda_RNAhybrid	-30.01	154	173	197	-33.4	0.162228	169	198
hsa-miR-6782-5p	GPX3	Miranda_RNAhybrid	-28.9	160	776	801	-40.3	0.002456	764	801
hsa-miR-6782-5p	SLC36A1	Miranda_RNAhybrid	-24.58	153	2315	2339	-34.6	0.18946	2779	2810
hsa-miR-6782-5p	GRIA1	Miranda_RNAhybrid	-30.35	166	436	462	-34.9	0.10598	1982	2011
hsa-miR-6782-5p	GALNT10	Miranda_RNAhybrid	-30.21	162	1266	1290	-34.2	0.210414	1259	1291
hsa-miR-6782-5p	LARP1	Miranda_RNAhybrid	-40.58	167	366	387	-42.6	0.008663	365	388
hsa-miR-6782-5p	SGCD	Miranda_RNAhybrid	-30.94	168	3403	3427	-33.1	0.525189	3394	3428
hsa-miR-6782-5p	NIPAL4	Miranda_RNAhybrid	-30.98	152	675	703	-33	0.133885	675	703
hsa-miR-6782-5p	ADAM19	Miranda_RNAhybrid	-27.44	162	444	469	-35.2	0.135916	575	607
hsa-miR-6782-5p	EBF1	Miranda_RNAhybrid	-23	150	580	607	-27.8	0.8728	1281	1314
hsa-miR-6782-5p	SH3PXD2B	Miranda_RNAhybrid	-28.64	161	3116	3141	-41.5	0.02004	3025	3060
hsa-miR-6782-5p	NEURL1B	Miranda_RNAhybrid	-21.04	151	721	745	-33.7	0.281424	1281	1308
hsa-miR-6782-5p	BNIP1	Miranda_RNAhybrid	-23.36	153	74	97	-34.9	0.00924	306	343
hsa-miR-6782-5p	C5orf47	Miranda_RNAhybrid	-25.4	151	1838	1862	-30.9	0.302053	656	683
hsa-miR-6782-5p	SFXN1	Miranda_RNAhybrid	-25.63	150	2321	2345	-34.3	0.151467	2412	2439
hsa-miR-6782-5p	CPLX2	Miranda_RNAhybrid	-32.2	163	856	880	-40.2	0.024797	2071	2099
hsa-miR-6782-5p	GPRIN1	Miranda_RNAhybrid	-34.15	165	916	945	-35.7	0.02196	919	945
hsa-miR-6782-5p	GRK6	Miranda_RNAhybrid	-24.82	150	371	397	-40	0.003775	388	433
hsa-miR-6782-5p	DBN1	Miranda_RNAhybrid	-28.6	151	245	268	-37	0.009266	358	388
hsa-miR-6782-5p	RMND5B	Miranda_RNAhybrid	-28.11	160	310	335	-33.4	0.022905	382	422
hsa-miR-6782-5p	MAML1	Miranda_RNAhybrid	-38.16	161	1817	1841	-42.1	0.006093	1822	1842
hsa-miR-6782-5p	FLT4	Miranda_RNAhybrid	-30.33	167	473	497	-37.2	0.024924	205	229
hsa-miR-6782-5p	TRIM41	Miranda_RNAhybrid	-34.46	168	337	361	-37.8	0.009503	331	362
hsa-miR-6782-5p	AGRN	Miranda_RNAhybrid	-25.23	156	203	227	-36	0.02321	275	304
hsa-miR-6782-5p	ACAP3	Miranda_RNAhybrid	-31.65	166	246	271	-41.4	0.002661	1115	1148
hsa-miR-6782-5p	MXRA8	Miranda_RNAhybrid	-31.46	162	172	197	-42	0.001346	151	198
hsa-miR-6782-5p	ATAD3C	Miranda_RNAhybrid	-33.11	167	31	55	-39.4	0.010022	1386	1430
hsa-miR-6782-5p	ATAD3A	Miranda_RNAhybrid	-33.11	167	32	56	-39.1	0.00228	48	72
hsa-miR-6782-5p	TMEM240	Miranda_RNAhybrid	-30.96	153	528	551	-35.2	0.011648	527	551
hsa-miR-6782-5p	C1orf233	Miranda_RNAhybrid	-33.9	161	1237	1261	-38.6	0.010029	1230	1262
hsa-miR-6782-5p	SKI	Miranda_RNAhybrid	-39.07	183	1601	1625	-42.7	0.008136	1602	1625
hsa-miR-6782-5p	MEGF6	Miranda_RNAhybrid	-39.37	160	897	926	-39.4	0.019042	896	927
hsa-miR-6782-5p	KCNAB2	Miranda_RNAhybrid	-37.73	173	1409	1435	-41	0.010506	1408	1435
hsa-miR-6782-5p	GPR153	Miranda_RNAhybrid	-24.22	157	83	107	-37	0.033798	1238	1266
hsa-miR-6782-5p	TNFRSF25	Miranda_RNAhybrid	-33.84	155	119	143	-36.9	0.001424	105	144
hsa-miR-6782-5p	PLEKHG5	Miranda_RNAhybrid	-32.1	150	338	367	-40.5	0.005425	969	1002
hsa-miR-6782-5p	ZBTB48	Miranda_RNAhybrid	-31.46	159	16	39	-34.7	0.000169	18	39
hsa-miR-6782-5p	PER3	Miranda_RNAhybrid	-22.01	156	1242	1265	-28.7	0.678732	1190	1228
hsa-miR-6782-5p	TMEM201	Miranda_RNAhybrid	-26.37	156	2221	2245	-34.5	0.123897	493	512
hsa-miR-6782-5p	CTNNBIP1	Miranda_RNAhybrid	-26.19	162	1907	1931	-36.6	0.051243	1213	1243
hsa-miR-6782-5p	MTOR	Miranda_RNAhybrid	-27.58	151	453	477	-31.4	0.118582	450	478
hsa-miR-6782-5p	FBXO44	Miranda_RNAhybrid	-34.2	155	858	882	-38.9	0.01681	864	883
hsa-miR-6782-5p	MTHFR	Miranda_RNAhybrid	-27.16	154	3118	3144	-39	0.049575	2571	2598
hsa-miR-6782-5p	CLCN6	Miranda_RNAhybrid	-27.26	150	250	274	-38.8	0.028112	1936	1964
hsa-miR-6782-5p	AADACL3	Miranda_RNAhybrid	-23.37	152	1854	1878	-30.6	0.46408	1844	1885
hsa-miR-6782-5p	LRRC38	Miranda_RNAhybrid	-36.47	170	700	726	-38.9	0.004519	701	726
hsa-miR-6782-5p	PRDM2	Miranda_RNAhybrid	-27.4	155	454	476	-34.7	0.079361	1599	1627
hsa-miR-6782-5p	EFHD2	Miranda_RNAhybrid	-38.05	174	243	269	-43	0.002304	412	440
hsa-miR-6782-5p	FAM131C	Miranda_RNAhybrid	-37.29	162	564	585	-37.9	0.004471	566	586
hsa-miR-6782-5p	RCC2	Miranda_RNAhybrid	-36.17	164	317	349	-37.9	0.029484	319	349
hsa-miR-6782-5p	ALDH4A1	Miranda_RNAhybrid	-33.62	164	66	88	-36.2	0.029133	387	413
hsa-miR-6782-5p	OTUD3	Miranda_RNAhybrid	-26.75	163	1377	1401	-36.2	0.140311	4645	4670
hsa-miR-6782-5p	CDA	Miranda_RNAhybrid	-26.31	157	135	157	-33.4	0.010764	190	209
hsa-miR-6782-5p	KIF17	Miranda_RNAhybrid	-30.55	164	482	505	-33.3	0.026181	477	506
hsa-miR-6782-5p	SH2D5	Miranda_RNAhybrid	-35.08	162	57	82	-38.9	0.016879	56	82
hsa-miR-6782-5p	RAP1GAP	Miranda_RNAhybrid	-36.9	169	299	324	-36	0.021452	301	325
hsa-miR-6782-5p	EPHA8	Miranda_RNAhybrid	-31.02	157	994	1021	-34.4	0.083895	1654	1673
hsa-miR-6782-5p	C1QB	Miranda_RNAhybrid	-27.22	153	53	73	-31.3	0.017148	43	73
hsa-miR-6782-5p	LUZP1	Miranda_RNAhybrid	-36.36	173	3698	3722	-36.3	0.126743	3694	3723
hsa-miR-6782-5p	E2F2	Miranda_RNAhybrid	-23.33	159	1109	1133	-32.7	0.293265	1943	1980
hsa-miR-6782-5p	CNR2	Miranda_RNAhybrid	-35.33	169	848	873	-37.2	0.074863	847	874
hsa-miR-6782-5p	MYOM3	Miranda_RNAhybrid	-24.7	152	377	401	-29.9	0.300194	374	401
hsa-miR-6782-5p	FAM110D	Miranda_RNAhybrid	-28.61	157	379	405	-35.4	0.009059	19	59
hsa-miR-6782-5p	SFN	Miranda_RNAhybrid	-39.74	182	195	221	-43.4	0.00022	189	222
hsa-miR-6782-5p	WDTC1	Miranda_RNAhybrid	-34.54	162	1435	1461	-40.7	0.009491	6	29
hsa-miR-6782-5p	GPR3	Miranda_RNAhybrid	-28.16	155	919	943	-32.3	0.09084	902	943
hsa-miR-6782-5p	FAM76A	Miranda_RNAhybrid	-35.3	160	924	946	-36.5	0.050276	925	946
hsa-miR-6782-5p	XKR8	Miranda_RNAhybrid	-26.38	157	355	379	-33.8	0.040896	610	647
hsa-miR-6782-5p	PHACTR4	Miranda_RNAhybrid	-23.74	158	291	316	-32.4	0.354399	1812	1843
hsa-miR-6782-5p	SDC3	Miranda_RNAhybrid	-33.69	160	1884	1908	-38.9	0.037172	2737	2761
hsa-miR-6782-5p	NKAIN1	Miranda_RNAhybrid	-32.61	169	1048	1073	-39.3	0.013431	1768	1794
hsa-miR-6782-5p	SERINC2	Miranda_RNAhybrid	-38.05	168	92	114	-41.3	0.000533	91	115
hsa-miR-6782-5p	TMEM234	Miranda_RNAhybrid	-35.53	168	1647	1670	-36.9	0.043849	1640	1671
hsa-miR-6782-5p	MARCKSL1	Miranda_RNAhybrid	-37.24	166	268	292	-38.7	0.004002	274	293
hsa-miR-6782-5p	BSDC1	Miranda_RNAhybrid	-24.37	150	1466	1490	-33.5	0.214405	1482	1514
hsa-miR-6782-5p	PHC2	Miranda_RNAhybrid	-31.16	150	762	793	-36	0.026109	761	793
hsa-miR-6782-5p	CSMD2	Miranda_RNAhybrid	-32.38	160	2029	2053	-39.1	0.021621	2017	2053
hsa-miR-6782-5p	NCDN	Miranda_RNAhybrid	-33.85	167	866	893	-37.1	0.014316	860	894
hsa-miR-6782-5p	AGO1	Miranda_RNAhybrid	-36.38	176	198	222	-40.8	0.061029	188	222
hsa-miR-6782-5p	EPHA10	Miranda_RNAhybrid	-34.75	165	1928	1957	-38.3	0.026203	1927	1957
hsa-miR-6782-5p	HEYL	Miranda_RNAhybrid	-24.27	152	1462	1484	-39.6	0.022274	1351	1382
hsa-miR-6782-5p	PPIE	Miranda_RNAhybrid	-32.65	165	2082	2108	-35.1	0.131159	2081	2109
hsa-miR-6782-5p	COL9A2	Miranda_RNAhybrid	-29.18	160	574	597	-35.5	0.013754	353	399
hsa-miR-6782-5p	SMAP2	Miranda_RNAhybrid	-36.19	157	45	70	-38.9	0.007781	40	71
hsa-miR-6782-5p	KCNQ4	Miranda_RNAhybrid	-32.23	167	1441	1465	-37	0.032381	1432	1465
hsa-miR-6782-5p	SLFNL1	Miranda_RNAhybrid	-41.1	175	432	455	-43.6	0.000211	433	456
hsa-miR-6782-5p	HIVEP3	Miranda_RNAhybrid	-31.53	156	470	499	-36.3	0.104825	862	886
hsa-miR-6782-5p	SLC2A1	Miranda_RNAhybrid	-29.85	158	1309	1333	-39	0.011974	1477	1513
hsa-miR-6782-5p	IPO13	Miranda_RNAhybrid	-31.28	159	4	27	-35.6	0.003823	5	27
hsa-miR-6782-5p	ERI3	Miranda_RNAhybrid	-33.15	159	204	225	-37.3	0.00337	205	225
hsa-miR-6782-5p	HECTD3	Miranda_RNAhybrid	-26.33	153	827	852	-33.1	0.059034	106	128
hsa-miR-6782-5p	GPBP1L1	Miranda_RNAhybrid	-35.22	165	341	364	-37.4	0.009897	342	365
hsa-miR-6782-5p	LURAP1	Miranda_RNAhybrid	-27.64	153	767	790	-31	0.154051	751	790
hsa-miR-6782-5p	DMBX1	Miranda_RNAhybrid	-32.92	164	428	453	-40.1	0.008145	586	626
hsa-miR-6782-5p	EFCAB14	Miranda_RNAhybrid	-24.59	156	2152	2176	-30	0.604111	1757	1793
hsa-miR-6782-5p	TRABD2B	Miranda_RNAhybrid	-30.59	159	4398	4422	-38.5	0.065973	5231	5253
hsa-miR-6782-5p	CC2D1B	Miranda_RNAhybrid	-25.05	152	266	290	-35	0.11465	623	653
hsa-miR-6782-5p	PODN	Miranda_RNAhybrid	-32.2	163	150	174	-36.4	0.016594	127	174
hsa-miR-6782-5p	CDCP2	Miranda_RNAhybrid	-28.13	163	1	21	-40	0.001139	13	52
hsa-miR-6782-5p	CYB5RL	Miranda_RNAhybrid	-32.59	167	830	854	-40.1	0.012233	1786	1820
hsa-miR-6782-5p	SSBP3	Miranda_RNAhybrid	-28.6	164	246	270	-34.3	0.078413	916	940
hsa-miR-6782-5p	ACOT11	Miranda_RNAhybrid	-34.77	159	128	150	-39.6	0.005841	121	151
hsa-miR-6782-5p	PARS2	Miranda_RNAhybrid	-28.04	170	48	74	-33.8	0.037237	1	21
hsa-miR-6782-5p	USP24	Miranda_RNAhybrid	-28.33	153	1927	1951	-31.8	0.312347	1933	1952
hsa-miR-6782-5p	INADL	Miranda_RNAhybrid	-25.23	152	1270	1294	-29.2	0.677704	1260	1294
hsa-miR-6782-5p	ROR1	Miranda_RNAhybrid	-29.62	163	928	952	-31.3	0.360884	928	952
hsa-miR-6782-5p	RAVER2	Miranda_RNAhybrid	-23.64	150	2125	2149	-30.1	0.450226	694	733
hsa-miR-6782-5p	LEPROT	Miranda_RNAhybrid	-39.08	166	1239	1260	-40.6	0.022283	1241	1261
hsa-miR-6782-5p	SERBP1	Miranda_RNAhybrid	-24.74	150	2212	2239	-31.4	0.59112	14	42
hsa-miR-6782-5p	GNG12	Miranda_RNAhybrid	-30.9	156	3482	3506	-34.8	0.171116	3481	3506
hsa-miR-6782-5p	HHLA3	Miranda_RNAhybrid	-29.76	162	310	336	-41.7	0.000325	238	262
hsa-miR-6782-5p	DDAH1	Miranda_RNAhybrid	-34.44	158	608	632	-36.3	0.072673	611	633
hsa-miR-6782-5p	SH3GLB1	Miranda_RNAhybrid	-30.59	159	3284	3311	-36.7	0.111514	2097	2138
hsa-miR-6782-5p	GBP1	Miranda_RNAhybrid	-27.36	158	1	26	-30.9	0.162816	2	27
hsa-miR-6782-5p	LRRC8C	Miranda_RNAhybrid	-24.54	162	3191	3215	-30	0.718156	2852	2877
hsa-miR-6782-5p	BARHL2	Miranda_RNAhybrid	-33.85	173	181	205	-39.6	0.000414	176	206
hsa-miR-6782-5p	ARHGAP29	Miranda_RNAhybrid	-28.22	166	720	745	-32.7	0.401578	4610	4636
hsa-miR-6782-5p	LOC102723542	Miranda_RNAhybrid	-25	157	26	54	-30.5	0.087374	5	54
hsa-miR-6782-5p	TMEM56	Miranda_RNAhybrid	-24.04	153	3127	3153	-29.2	0.876696	3979	4001
hsa-miR-6782-5p	SORT1	Miranda_RNAhybrid	-28.19	156	1096	1122	-36.6	0.104145	3382	3420
hsa-miR-6782-5p	CYB561D1	Miranda_RNAhybrid	-28.7	154	3319	3348	-36.9	0.099779	3307	3348
hsa-miR-6782-5p	CSF1	Miranda_RNAhybrid	-26.38	152	52	76	-34.7	0.091268	1557	1607
hsa-miR-6782-5p	UBL4B	Miranda_RNAhybrid	-25.14	157	85	111	-31.1	0.122913	472	504
hsa-miR-6782-5p	SLC6A17	Miranda_RNAhybrid	-32.61	161	796	819	-43.6	0.006566	3015	3041
hsa-miR-6782-5p	DCLRE1B	Miranda_RNAhybrid	-28.52	163	857	881	-33.2	0.135104	845	881
hsa-miR-6782-5p	VANGL1	Miranda_RNAhybrid	-33.31	162	621	647	-39.6	0.059291	2901	2924
hsa-miR-6782-5p	PTGFRN	Miranda_RNAhybrid	-33.75	155	2475	2499	-37.1	0.063407	2480	2500
hsa-miR-6782-5p	WDR3	Miranda_RNAhybrid	-26.48	153	756	780	-30.5	0.174799	763	781
hsa-miR-6782-5p	SV2A	Miranda_RNAhybrid	-33.53	163	1550	1573	-35.9	0.041955	1552	1574
hsa-miR-6782-5p	GOLPH3L	Miranda_RNAhybrid	-26.9	156	1085	1109	-31.8	0.247533	786	815
hsa-miR-6782-5p	ARNT	Miranda_RNAhybrid	-37.13	178	91	115	-38.6	0.022283	92	116
hsa-miR-6782-5p	FAM63A	Miranda_RNAhybrid	-35.18	157	60	80	-38.1	0.002912	59	81
hsa-miR-6782-5p	LCE6A	Miranda_RNAhybrid	-26.26	162	162	187	-32.1	0.009251	163	187
hsa-miR-6782-5p	S100A3	Miranda_RNAhybrid	-28.15	154	203	226	-34.3	0.007421	49	82
hsa-miR-6782-5p	IL6R	Miranda_RNAhybrid	-24.73	150	331	355	-32.3	0.380046	373	435
hsa-miR-6782-5p	SHE	Miranda_RNAhybrid	-32.88	161	3863	3888	-35.8	0.143716	3869	3888
hsa-miR-6782-5p	KCNN3	Miranda_RNAhybrid	-24.52	165	6430	6453	-39.3	0.105318	3363	3402
hsa-miR-6782-5p	PBXIP1	Miranda_RNAhybrid	-34.83	166	753	778	-41	0.002128	757	779
hsa-miR-6782-5p	PYGO2	Miranda_RNAhybrid	-29.1	155	357	380	-33.5	0.110377	349	381
hsa-miR-6782-5p	SLC50A1	Miranda_RNAhybrid	-28.58	163	545	570	-35.3	0.010972	537	571
hsa-miR-6782-5p	ASH1L	Miranda_RNAhybrid	-26.07	156	847	874	-33.5	0.157466	591	613
hsa-miR-6782-5p	SSR2	Miranda_RNAhybrid	-28.42	155	331	355	-31.4	0.048569	335	356
hsa-miR-6782-5p	RAB25	Miranda_RNAhybrid	-28.93	162	155	179	-36.5	0.001002	9	45
hsa-miR-6782-5p	MEX3A	Miranda_RNAhybrid	-33.78	168	340	366	-39.4	0.039514	861	880
hsa-miR-6782-5p	LMNA	Miranda_RNAhybrid	-39.62	162	573	595	-41	0.002282	574	596
hsa-miR-6782-5p	MEF2D	Miranda_RNAhybrid	-34.29	170	3492	3516	-37.5	0.065377	2149	2174
hsa-miR-6782-5p	IQGAP3	Miranda_RNAhybrid	-31.7	164	109	131	-33.2	0.067902	388	427
hsa-miR-6782-5p	HAPLN2	Miranda_RNAhybrid	-27.01	155	46	72	-30	0.052463	64	114
hsa-miR-6782-5p	ETV3L	Miranda_RNAhybrid	-26.82	153	403	427	-37.8	0.00395	419	451
hsa-miR-6782-5p	KIRREL	Miranda_RNAhybrid	-30.08	157	315	338	-36	0.148355	1603	1631
hsa-miR-6782-5p	DUSP23	Miranda_RNAhybrid	-31.15	173	114	138	-33.7	0.003599	99	139
hsa-miR-6782-5p	NCSTN	Miranda_RNAhybrid	-36.21	167	351	372	-39.7	0.002101	352	373
hsa-miR-6782-5p	NHLH1	Miranda_RNAhybrid	-35.53	177	1502	1527	-43.6	0.001981	1490	1528
hsa-miR-6782-5p	VANGL2	Miranda_RNAhybrid	-33.36	163	1099	1123	-35	0.13093	1100	1123
hsa-miR-6782-5p	DEDD	Miranda_RNAhybrid	-28.24	166	143	167	-33.1	0.048303	56	85
hsa-miR-6782-5p	TOMM40L	Miranda_RNAhybrid	-36.78	178	272	299	-38.5	0.014427	272	299
hsa-miR-6782-5p	MPZ	Miranda_RNAhybrid	-30.89	152	349	373	-34.9	0.035992	365	408
hsa-miR-6782-5p	ATF6	Miranda_RNAhybrid	-27.03	154	4334	4360	-32.6	0.440931	4315	4361
hsa-miR-6782-5p	C1orf226	Miranda_RNAhybrid	-28.16	157	397	421	-39.3	0.025843	412	460
hsa-miR-6782-5p	ILDR2	Miranda_RNAhybrid	-28.38	155	2743	2767	-35.6	0.201833	2758	2788
hsa-miR-6782-5p	POU2F1	Miranda_RNAhybrid	-29.62	172	9329	9351	-35.9	0.319484	2127	2156
hsa-miR-6782-5p	MPZL1	Miranda_RNAhybrid	-33.27	168	2566	2588	-35.2	0.14988	2567	2589
hsa-miR-6782-5p	SELP	Miranda_RNAhybrid	-23.53	157	225	248	-36.3	0.010128	240	263
hsa-miR-6782-5p	PRRX1	Miranda_RNAhybrid	-24.38	157	873	896	-28.3	0.833724	1643	1667
hsa-miR-6782-5p	TNFSF4	Miranda_RNAhybrid	-35.49	160	132	156	-39.4	0.021044	135	156
hsa-miR-6782-5p	QSOX1	Miranda_RNAhybrid	-33.4	157	58	86	-41.5	0.001885	51	86
hsa-miR-6782-5p	XPR1	Miranda_RNAhybrid	-28.67	165	5717	5740	-33.3	0.404534	3658	3681
hsa-miR-6782-5p	COLGALT2	Miranda_RNAhybrid	-28.46	151	858	882	-33.6	0.187759	1115	1143
hsa-miR-6782-5p	C1orf21	Miranda_RNAhybrid	-26.58	161	7958	7983	-34.7	0.380776	8870	8912
hsa-miR-6782-5p	C1orf106	Miranda_RNAhybrid	-36.4	170	40	65	-38.4	0.021161	39	66
hsa-miR-6782-5p	PKP1	Miranda_RNAhybrid	-29.96	152	1544	1568	-38.2	0.035692	1601	1627
hsa-miR-6782-5p	CSRP1	Miranda_RNAhybrid	-33.68	165	983	1012	-36.3	0.0217	984	1013
hsa-miR-6782-5p	LMOD1	Miranda_RNAhybrid	-32.07	169	1341	1367	-38.1	0.020868	62	90
hsa-miR-6782-5p	ARL8A	Miranda_RNAhybrid	-32.21	158	47	74	-46.5	0.00026	261	291
hsa-miR-6782-5p	PPP1R12B	Miranda_RNAhybrid	-31.51	170	4857	4884	-35.6	0.256881	32	57
hsa-miR-6782-5p	SYT2	Miranda_RNAhybrid	-32.2	155	4336	4360	-36.6	0.145123	3635	3665
hsa-miR-6782-5p	FMOD	Miranda_RNAhybrid	-32.14	159	633	657	-34.8	0.065701	616	658
hsa-miR-6782-5p	PRELP	Miranda_RNAhybrid	-38.9	172	4296	4320	-41.3	0.019373	4297	4321
hsa-miR-6782-5p	ATP2B4	Miranda_RNAhybrid	-32.44	168	2057	2081	-38.5	0.053827	2040	2081
hsa-miR-6782-5p	SOX13	Miranda_RNAhybrid	-28.04	154	379	404	-44.1	0.001464	997	1021
hsa-miR-6782-5p	ETNK2	Miranda_RNAhybrid	-32.45	156	258	283	-35.4	0.02911	255	284
hsa-miR-6782-5p	LRRN2	Miranda_RNAhybrid	-30.9	150	317	346	-34.7	0.018537	310	346
hsa-miR-6782-5p	CNTN2	Miranda_RNAhybrid	-33.17	170	828	852	-39.3	0.03788	1919	1942
hsa-miR-6782-5p	DSTYK	Miranda_RNAhybrid	-32.61	165	1496	1521	-36.6	0.11898	1482	1522
hsa-miR-6782-5p	TMCC2	Miranda_RNAhybrid	-34.05	162	545	572	-38.1	0.010824	552	572
hsa-miR-6782-5p	NUAK2	Miranda_RNAhybrid	-25.32	155	451	475	-32.4	0.127006	448	476
hsa-miR-6782-5p	ELK4	Miranda_RNAhybrid	-32.27	169	3784	3809	-33	0.545651	3786	3810
hsa-miR-6782-5p	SLC45A3	Miranda_RNAhybrid	-27.85	156	936	963	-34.8	0.04947	31	62
hsa-miR-6782-5p	SLC41A1	Miranda_RNAhybrid	-36.83	166	2037	2064	-36.7	0.049292	2024	2065
hsa-miR-6782-5p	RAB7B	Miranda_RNAhybrid	-31.54	154	391	416	-34.2	0.105277	276	306
hsa-miR-6782-5p	SRGAP2	Miranda_RNAhybrid	-29.57	153	2517	2541	-32.9	0.243082	2276	2312
hsa-miR-6782-5p	MAPKAPK2	Miranda_RNAhybrid	-32.74	166	348	372	-39	0.017725	364	393
hsa-miR-6782-5p	PFKFB2	Miranda_RNAhybrid	-32.36	159	98	120	-35.4	0.191481	48	71
hsa-miR-6782-5p	CD34	Miranda_RNAhybrid	-38.06	170	68	92	-39.9	0.007611	68	93
hsa-miR-6782-5p	CAMK1G	Miranda_RNAhybrid	-29.1	156	863	887	-34.1	0.038619	860	887
hsa-miR-6782-5p	DIEXF	Miranda_RNAhybrid	-32.25	165	4858	4882	-37.4	0.111037	4170	4199
hsa-miR-6782-5p	KCNH1	Miranda_RNAhybrid	-36.14	165	38	64	-37.2	0.094959	38	65
hsa-miR-6782-5p	ATF3	Miranda_RNAhybrid	-34.67	154	143	172	-37.9	0.018658	144	173
hsa-miR-6782-5p	PTPN14	Miranda_RNAhybrid	-28.67	160	555	582	-38.1	0.134285	4445	4475
hsa-miR-6782-5p	KCNK2	Miranda_RNAhybrid	-39.04	170	520	544	-41.1	0.006561	526	545
hsa-miR-6782-5p	USH2A	Miranda_RNAhybrid	-25.87	150	2444	2468	-33.5	0.191447	1250	1275
hsa-miR-6782-5p	RRP15	Miranda_RNAhybrid	-27.98	160	2289	2313	-38.3	0.093041	2628	2660
hsa-miR-6782-5p	MARK1	Miranda_RNAhybrid	-26.86	154	996	1020	-34.3	0.111968	86	121
hsa-miR-6782-5p	FAM177B	Miranda_RNAhybrid	-36.38	159	238	262	-38.1	0.003358	238	263
hsa-miR-6782-5p	CAPN8	Miranda_RNAhybrid	-26.59	162	35	60	-33.9	0.004117	22	60
hsa-miR-6782-5p	WDR26	Miranda_RNAhybrid	-31.48	163	3286	3307	-34.9	0.194888	3287	3307
hsa-miR-6782-5p	SRP9	Miranda_RNAhybrid	-27.48	158	935	964	-29.6	0.312855	936	965
hsa-miR-6782-5p	EPHX1	Miranda_RNAhybrid	-30.42	156	118	142	-34.4	0.002831	117	142
hsa-miR-6782-5p	C1orf95	Miranda_RNAhybrid	-32.26	157	3428	3454	-35.6	0.232848	4910	4935
hsa-miR-6782-5p	ITPKB	Miranda_RNAhybrid	-25.45	154	2860	2884	-35	0.115399	2762	2792
hsa-miR-6782-5p	CDC42BPA	Miranda_RNAhybrid	-27.85	154	2156	2181	-36.6	0.102484	2795	2823
hsa-miR-6782-5p	JMJD4	Miranda_RNAhybrid	-27.37	154	362	388	-35	0.037795	80	107
hsa-miR-6782-5p	WNT3A	Miranda_RNAhybrid	-41.13	175	787	815	-42.3	0.003631	787	816
hsa-miR-6782-5p	GJC2	Miranda_RNAhybrid	-25.38	156	258	283	-36.6	0.009499	248	284
hsa-miR-6782-5p	CCSAP	Miranda_RNAhybrid	-24.19	150	985	1009	-32	0.426437	980	1010
hsa-miR-6782-5p	GALNT2	Miranda_RNAhybrid	-30.9	161	1453	1481	-38.8	0.024992	2123	2143
hsa-miR-6782-5p	TOMM20	Miranda_RNAhybrid	-21.76	152	649	674	-32.3	0.270179	643	675
hsa-miR-6782-5p	GNG4	Miranda_RNAhybrid	-25.95	155	3897	3918	-31.2	0.547311	1010	1050
hsa-miR-6782-5p	NID1	Miranda_RNAhybrid	-27.59	161	204	227	-40.7	0.008208	193	228
hsa-miR-6782-5p	ERO1LB	Miranda_RNAhybrid	-21.59	159	1420	1444	-33	0.264972	754	787
hsa-miR-6782-5p	LGALS8	Miranda_RNAhybrid	-25.42	157	3182	3206	-37.9	0.071927	4330	4365
hsa-miR-6782-5p	ZMYND11	Miranda_RNAhybrid	-25.24	156	1697	1722	-27.7	0.770938	1675	1723
hsa-miR-6782-5p	LARP4B	Miranda_RNAhybrid	-34.31	162	5666	5691	-36.5	0.147297	5670	5692
hsa-miR-6782-5p	ADARB2	Miranda_RNAhybrid	-40.48	167	353	374	-39.8	0.046111	349	375
hsa-miR-6782-5p	SFMBT2	Miranda_RNAhybrid	-32.83	170	2222	2246	-35.2	0.193382	3111	3136
hsa-miR-6782-5p	ITIH5	Miranda_RNAhybrid	-31.77	162	99	127	-36.4	0.093691	89	128
hsa-miR-6782-5p	CELF2	Miranda_RNAhybrid	-31.94	152	416	440	-35	0.294215	3298	3327
hsa-miR-6782-5p	CCDC3	Miranda_RNAhybrid	-25.33	153	1713	1736	-30.8	0.297236	1697	1737
hsa-miR-6782-5p	FAM107B	Miranda_RNAhybrid	-26.44	156	2227	2251	-32.9	0.213975	2243	2276
hsa-miR-6782-5p	PLXDC2	Miranda_RNAhybrid	-30.35	157	5136	5159	-32.4	0.673022	9786	9813
hsa-miR-6782-5p	PIP4K2A	Miranda_RNAhybrid	-33.21	166	720	742	-44.1	0.002727	712	742
hsa-miR-6782-5p	MSRB2	Miranda_RNAhybrid	-30.87	155	10	35	-33.7	0.060279	13	35
hsa-miR-6782-5p	ANKRD26	Miranda_RNAhybrid	-24.83	157	610	638	-30.9	0.238921	630	661
hsa-miR-6782-5p	RAB18	Miranda_RNAhybrid	-40.61	161	3773	3793	-42.6	0.011035	3773	3794
hsa-miR-6782-5p	KIAA1462	Miranda_RNAhybrid	-35.59	158	1207	1229	-38.4	0.06411	1208	1229
hsa-miR-6782-5p	FZD8	Miranda_RNAhybrid	-30.94	165	73	96	-38.6	0.007466	738	760
hsa-miR-6782-5p	CSGALNACT2	Miranda_RNAhybrid	-23.99	152	564	588	-31	0.273239	402	443
hsa-miR-6782-5p	C10orf10	Miranda_RNAhybrid	-34.1	158	654	684	-35	0.034691	657	685
hsa-miR-6782-5p	ANXA8L1	Miranda_RNAhybrid	-29.25	154	690	712	-36.5	0.012231	689	712
hsa-miR-6782-5p	ANXA8	Miranda_RNAhybrid	-29.25	154	690	712	-36.5	0.012231	689	712
hsa-miR-6782-5p	ASCC1	Miranda_RNAhybrid	-34.39	159	1192	1213	-38.3	0.012423	1193	1214
hsa-miR-6782-5p	DNAJB12	Miranda_RNAhybrid	-36.63	175	2131	2155	-39.8	0.019806	2131	2156
hsa-miR-6782-5p	MCU	Miranda_RNAhybrid	-30.83	154	1494	1514	-32	0.205729	1494	1514
hsa-miR-6782-5p	CAMK2G	Miranda_RNAhybrid	-23.92	151	1233	1258	-38.9	0.016323	143	177
hsa-miR-6782-5p	SAMD8	Miranda_RNAhybrid	-34.27	164	1864	1891	-35.3	0.212411	1864	1892
hsa-miR-6782-5p	KCNMA1	Miranda_RNAhybrid	-27.89	159	767	790	-36.6	0.194495	5810	5849
hsa-miR-6782-5p	PPIF	Miranda_RNAhybrid	-27.01	168	301	325	-35.6	0.042694	1435	1461
hsa-miR-6782-5p	ZCCHC24	Miranda_RNAhybrid	-42.03	170	1183	1211	-43.8	0.006705	1183	1212
hsa-miR-6782-5p	SFTPA2	Miranda_RNAhybrid	-32.36	157	1273	1297	-36.8	0.020733	1273	1298
hsa-miR-6782-5p	ANXA11	Miranda_RNAhybrid	-29.4	160	120	141	-33.7	0.032398	105	141
hsa-miR-6782-5p	TSPAN14	Miranda_RNAhybrid	-26.63	157	1973	1998	-38.9	0.048532	2861	2888
hsa-miR-6782-5p	SH2D4B	Miranda_RNAhybrid	-28.93	157	2226	2252	-38.5	0.025372	2222	2253
hsa-miR-6782-5p	CCSER2	Miranda_RNAhybrid	-24.05	152	1086	1107	-29.3	0.830828	660	687
hsa-miR-6782-5p	HTR7	Miranda_RNAhybrid	-36.42	169	1094	1115	-37.7	0.020066	1096	1116
hsa-miR-6782-5p	ENTPD1	Miranda_RNAhybrid	-24.58	156	5613	5637	-38.3	0.148093	8296	8337
hsa-miR-6782-5p	CC2D2B	Miranda_RNAhybrid	-31.27	161	141	165	-34.6	0.071444	141	166
hsa-miR-6782-5p	MARVELD1	Miranda_RNAhybrid	-26.55	158	894	915	-38.4	0.027309	424	464
hsa-miR-6782-5p	ZFYVE27	Miranda_RNAhybrid	-37.47	179	49	73	-39.7	0.008521	50	74
hsa-miR-6782-5p	CNNM1	Miranda_RNAhybrid	-31.09	170	114	138	-31.8	0.326708	2612	2640
hsa-miR-6782-5p	ABCC2	Miranda_RNAhybrid	-29.5	151	207	229	-33.3	0.007586	181	229
hsa-miR-6782-5p	SCD	Miranda_RNAhybrid	-27.21	151	1763	1791	-31.5	0.464557	1761	1792
hsa-miR-6782-5p	HIF1AN	Miranda_RNAhybrid	-31.74	159	1655	1676	-38.4	0.074262	4191	4214
hsa-miR-6782-5p	SFXN3	Miranda_RNAhybrid	-23.74	153	44	69	-31.7	0.201011	590	612
hsa-miR-6782-5p	KCNIP2	Miranda_RNAhybrid	-31.88	166	1176	1201	-38.4	0.011529	319	357
hsa-miR-6782-5p	LDB1	Miranda_RNAhybrid	-29.81	162	26	49	-37.2	0.021774	300	343
hsa-miR-6782-5p	NFKB2	Miranda_RNAhybrid	-33.85	152	67	91	-36.9	0.000384	71	91
hsa-miR-6782-5p	SUFU	Miranda_RNAhybrid	-27.38	161	2574	2598	-33	0.258219	1189	1213
hsa-miR-6782-5p	ARL3	Miranda_RNAhybrid	-36.31	166	663	685	-38.8	0.031209	662	686
hsa-miR-6782-5p	WBP1L	Miranda_RNAhybrid	-38.98	173	1246	1272	-39.8	0.019389	1248	1272
hsa-miR-6782-5p	SH3PXD2A	Miranda_RNAhybrid	-34.59	160	1786	1810	-38.1	0.113129	1793	1811
hsa-miR-6782-5p	ITPRIP	Miranda_RNAhybrid	-36.12	177	4369	4393	-41	0.023104	4365	4394
hsa-miR-6782-5p	GPAM	Miranda_RNAhybrid	-28.96	162	817	842	-31.6	0.433382	817	842
hsa-miR-6782-5p	C10orf118	Miranda_RNAhybrid	-28.43	170	1426	1452	-33.6	0.27165	1077	1112
hsa-miR-6782-5p	LHPP	Miranda_RNAhybrid	-45.53	186	28	53	-46.5	0.000141	28	54
hsa-miR-6782-5p	STK32C	Miranda_RNAhybrid	-38.06	161	5	28	-39.5	0.001391	6	28
hsa-miR-6782-5p	GPR123	Miranda_RNAhybrid	-25.95	151	126	148	-41.3	0.007095	114	154
hsa-miR-6782-5p	SPRN	Miranda_RNAhybrid	-33.27	174	1624	1649	-41.4	0.008722	1608	1649
hsa-miR-6782-5p	SOX11	Miranda_RNAhybrid	-37.37	163	3468	3490	-40.5	0.047094	3465	3491
hsa-miR-6782-5p	FAM49A	Miranda_RNAhybrid	-28.23	162	857	883	-30.9	0.501256	849	883
hsa-miR-6824-5p	SPATA6L	Miranda_RNAhybrid	-25.74	152	1755	1775	-29.4	0.438862	1756	1776
hsa-miR-6824-5p	NFIB	Miranda_RNAhybrid	-38.99	174	2894	2914	-42.7	0.010183	2894	2914
hsa-miR-6824-5p	ZDHHC21	Miranda_RNAhybrid	-25.97	156	2119	2140	-34.7	0.226573	2103	2140
hsa-miR-6824-5p	BNC2	Miranda_RNAhybrid	-21.51	151	3087	3108	-33.2	0.415535	6011	6037
hsa-miR-6824-5p	ADAMTSL1	Miranda_RNAhybrid	-22.11	151	932	953	-34	0.081534	916	953
hsa-miR-6824-5p	KIAA1161	Miranda_RNAhybrid	-25.88	153	1531	1554	-34.9	0.109316	1528	1555
hsa-miR-6824-5p	FAM214B	Miranda_RNAhybrid	-31.81	159	569	592	-36.1	0.011516	558	593
hsa-miR-6824-5p	PAX5	Miranda_RNAhybrid	-24.28	152	6139	6158	-37.5	0.080637	1954	1974
hsa-miR-6824-5p	RFK	Miranda_RNAhybrid	-20.03	154	1346	1367	-35.4	0.03394	718	745
hsa-miR-6824-5p	GNA14	Miranda_RNAhybrid	-32.74	165	1	25	-35.7	0.009997	3	26
hsa-miR-6824-5p	S1PR3	Miranda_RNAhybrid	-23.94	151	1396	1418	-33.9	0.102546	673	709
hsa-miR-6824-5p	SHC3	Miranda_RNAhybrid	-33.67	162	2969	2990	-37.7	0.079585	4925	4948
hsa-miR-6824-5p	CDC14B	Miranda_RNAhybrid	-27.93	156	2720	2744	-36.5	0.051516	2706	2745
hsa-miR-6824-5p	ANKS6	Miranda_RNAhybrid	-23.84	153	1492	1511	-36.9	0.057705	1477	1512
hsa-miR-6824-5p	FAM206A	Miranda_RNAhybrid	-29.14	160	576	596	-33.4	0.045585	575	597
hsa-miR-6824-5p	PALM2	Miranda_RNAhybrid	-27.52	150	7062	7082	-34.9	0.217007	394	423
hsa-miR-6824-5p	RAB14	Miranda_RNAhybrid	-25.55	153	2873	2897	-30.7	0.36698	11	43
hsa-miR-6824-5p	PTGS1	Miranda_RNAhybrid	-31.37	168	1550	1571	-36.3	0.04679	1548	1572
hsa-miR-6824-5p	ST6GALNAC6	Miranda_RNAhybrid	-36	161	632	651	-36.9	0.010282	632	652
hsa-miR-6824-5p	PIP5KL1	Miranda_RNAhybrid	-22.82	155	102	124	-35.7	0.0111	500	523
hsa-miR-6824-5p	ASB6	Miranda_RNAhybrid	-29.4	155	1881	1903	-36.3	0.047295	1470	1496
hsa-miR-6824-5p	BARHL1	Miranda_RNAhybrid	-26.5	154	289	309	-37.1	0.003749	100	120
hsa-miR-6824-5p	AK8	Miranda_RNAhybrid	-29.39	165	62	83	-33.8	0.000396	43	83
hsa-miR-6824-5p	FAM163B	Miranda_RNAhybrid	-29.06	160	1017	1036	-36.1	0.026675	1657	1690
hsa-miR-6824-5p	RXRA	Miranda_RNAhybrid	-24.86	155	2772	2793	-35	0.100809	75	98
hsa-miR-6824-5p	FAM69B	Miranda_RNAhybrid	-25.37	156	701	723	-34.7	0.016799	695	723
hsa-miR-6824-5p	LCN12	Miranda_RNAhybrid	-30.11	157	438	457	-37	0.003859	431	457
hsa-miR-6824-5p	CCT5	Miranda_RNAhybrid	-35.14	169	968	991	-43.4	0.000935	964	992
hsa-miR-6824-5p	MYO10	Miranda_RNAhybrid	-23.03	156	2638	2659	-31.7	0.374233	1993	2027
hsa-miR-6824-5p	DNAJC21	Miranda_RNAhybrid	-25	155	2896	2918	-36.1	0.072494	2660	2692
hsa-miR-6824-5p	PRLR	Miranda_RNAhybrid	-23.9	155	1926	1949	-34.9	0.249781	3791	3821
hsa-miR-6824-5p	NADK2	Miranda_RNAhybrid	-22.54	160	1609	1630	-33	0.128824	1739	1765
hsa-miR-6824-5p	LIFR	Miranda_RNAhybrid	-22.46	150	2239	2261	-32	0.442946	1824	1844
hsa-miR-6824-5p	C5orf51	Miranda_RNAhybrid	-29.76	153	1444	1463	-39.5	0.020518	1436	1463
hsa-miR-6824-5p	RPS23	Miranda_RNAhybrid	-25.23	158	2622	2642	-32.6	0.164835	1600	1622
hsa-miR-6824-5p	LOC101929747	Miranda_RNAhybrid	-20.72	159	255	276	-36.1	0.014725	477	507
hsa-miR-6824-5p	STARD4	Miranda_RNAhybrid	-24.24	160	3456	3477	-28.7	0.698666	3450	3477
hsa-miR-6824-5p	SEMA6A	Miranda_RNAhybrid	-21.58	155	2911	2932	-28.5	0.642672	1611	1646
hsa-miR-6824-5p	NEUROG1	Miranda_RNAhybrid	-24.87	156	18	37	-35	0.008987	191	216
hsa-miR-6824-5p	KLHL3	Miranda_RNAhybrid	-20.13	160	2863	2884	-33.6	0.194664	3472	3500
hsa-miR-6824-5p	PCDH12	Miranda_RNAhybrid	-25.72	152	571	592	-33.9	0.058816	994	1016
hsa-miR-6824-5p	PRELID2	Miranda_RNAhybrid	-30.28	161	3863	3888	-35	0.10716	3862	3888
hsa-miR-6824-5p	SH3RF2	Miranda_RNAhybrid	-21.71	160	516	537	-30.2	0.437765	500	537
hsa-miR-6824-5p	DPYSL3	Miranda_RNAhybrid	-24.1	153	597	616	-36.1	0.051727	2524	2563
hsa-miR-6824-5p	CSF1R	Miranda_RNAhybrid	-34.08	159	220	241	-37.1	0.004178	219	242
hsa-miR-6824-5p	CAMK2A	Miranda_RNAhybrid	-29.82	163	515	539	-34.4	0.100588	580	622
hsa-miR-6824-5p	G3BP1	Miranda_RNAhybrid	-24.44	153	7150	7172	-35.7	0.150385	2765	2790
hsa-miR-6824-5p	SGCD	Miranda_RNAhybrid	-26.31	151	4837	4859	-36.5	0.132851	1228	1259
hsa-miR-6824-5p	TENM2	Miranda_RNAhybrid	-27.81	166	253	274	-28.4	0.352615	253	274
hsa-miR-6824-5p	SLIT3	Miranda_RNAhybrid	-23.42	150	518	539	-33.3	0.224347	3320	3360
hsa-miR-6824-5p	CPLX2	Miranda_RNAhybrid	-26.56	154	3393	3413	-35.8	0.074115	3603	3645
hsa-miR-6824-5p	N4BP3	Miranda_RNAhybrid	-27.21	153	1864	1888	-47.6	0.000823	2529	2551
hsa-miR-6824-5p	SLC35E2B	Miranda_RNAhybrid	-27.34	156	3059	3080	-32.8	0.239525	736	760
hsa-miR-6824-5p	SLC35E2	Miranda_RNAhybrid	-27.34	156	3825	3846	-32.9	0.270327	1506	1527
hsa-miR-6824-5p	NADK	Miranda_RNAhybrid	-27.18	158	420	440	-35.4	0.028466	1246	1292
hsa-miR-6824-5p	TP73	Miranda_RNAhybrid	-28.02	152	1479	1500	-37.2	0.032452	1474	1501
hsa-miR-6824-5p	CHD5	Miranda_RNAhybrid	-26.75	155	500	521	-36	0.063545	2197	2221
hsa-miR-6824-5p	CTNNBIP1	Miranda_RNAhybrid	-28.86	164	1644	1667	-37.5	0.020612	84	113
hsa-miR-6824-5p	CLCN6	Miranda_RNAhybrid	-23.72	154	2104	2125	-35.5	0.057859	3	23
hsa-miR-6824-5p	ATP13A2	Miranda_RNAhybrid	-22.49	152	153	174	-31.8	0.007596	143	175
hsa-miR-6824-5p	KLHDC7A	Miranda_RNAhybrid	-32.38	151	123	146	-36	0.042726	122	146
hsa-miR-6824-5p	HTR6	Miranda_RNAhybrid	-23.68	159	1529	1550	-37.6	0.010746	1187	1218
hsa-miR-6824-5p	PLA2G2D	Miranda_RNAhybrid	-24.54	157	1143	1162	-39.1	0.004967	1168	1201
hsa-miR-6824-5p	HP1BP3	Miranda_RNAhybrid	-20.62	150	91	112	-33.5	0.085086	637	668
hsa-miR-6824-5p	GALE	Miranda_RNAhybrid	-31.93	163	87	109	-39.5	0.000283	71	110
hsa-miR-6824-5p	CNR2	Miranda_RNAhybrid	-20.07	150	810	833	-32.6	0.239898	849	875
hsa-miR-6824-5p	IFNLR1	Miranda_RNAhybrid	-24.89	155	464	486	-38.7	0.016629	449	486
hsa-miR-6824-5p	CLIC4	Miranda_RNAhybrid	-41.35	173	197	216	-44.7	0.001897	197	217
hsa-miR-6824-5p	RUNX3	Miranda_RNAhybrid	-25.98	157	810	831	-41.3	0.004926	453	476
hsa-miR-6824-5p	LDLRAP1	Miranda_RNAhybrid	-23.31	154	729	751	-36.7	0.041061	1036	1062
hsa-miR-6824-5p	LIN28A	Miranda_RNAhybrid	-31.07	163	1557	1580	-33.6	0.135874	1557	1580
hsa-miR-6824-5p	LOC101928728	Miranda_RNAhybrid	-22.12	151	2437	2460	-37.2	0.032791	1797	1819
hsa-miR-6824-5p	SFN	Miranda_RNAhybrid	-28.9	156	69	94	-33.7	0.009343	197	223
hsa-miR-6824-5p	XKR8	Miranda_RNAhybrid	-27.55	156	369	390	-36.4	0.007223	660	683
hsa-miR-6824-5p	PHACTR4	Miranda_RNAhybrid	-23.3	153	298	323	-33.1	0.191925	1869	1898
hsa-miR-6824-5p	HCRTR1	Miranda_RNAhybrid	-23.02	152	135	156	-34.1	0.003834	10	46
hsa-miR-6824-5p	KPNA6	Miranda_RNAhybrid	-27.32	155	3670	3693	-36.7	0.081164	1550	1571
hsa-miR-6824-5p	RBBP4	Miranda_RNAhybrid	-21.54	151	2254	2276	-34.2	0.223132	4017	4042
hsa-miR-6824-5p	AGO4	Miranda_RNAhybrid	-21.15	150	741	763	-26	0.977238	3036	3063
hsa-miR-6824-5p	STK40	Miranda_RNAhybrid	-23.14	158	922	944	-34.4	0.060129	436	460
hsa-miR-6824-5p	SNIP1	Miranda_RNAhybrid	-28.9	157	2930	2949	-32.2	0.22654	2930	2949
hsa-miR-6824-5p	DNALI1	Miranda_RNAhybrid	-28.44	167	115	137	-36.9	0.017116	105	137
hsa-miR-6824-5p	SLFNL1	Miranda_RNAhybrid	-36.8	172	245	266	-38.5	0.000999	245	266
hsa-miR-6824-5p	C1orf210	Miranda_RNAhybrid	-24.33	156	283	304	-32.8	0.03643	266	305
hsa-miR-6824-5p	KDM4A	Miranda_RNAhybrid	-21.16	150	650	670	-37.5	0.006674	465	491
hsa-miR-6824-5p	SPATA6	Miranda_RNAhybrid	-24.64	150	1874	1894	-28.2	0.718469	1878	1894
hsa-miR-6824-5p	USP24	Miranda_RNAhybrid	-30.68	163	1737	1760	-41.5	0.004744	2456	2482
hsa-miR-6824-5p	KANK4	Miranda_RNAhybrid	-21.97	152	914	935	-29.5	0.369189	40	66
hsa-miR-6824-5p	DPH5	Miranda_RNAhybrid	-31.23	160	204	222	-34.1	0.016471	205	223
hsa-miR-6824-5p	GSTM4	Miranda_RNAhybrid	-24.95	157	148	167	-34.6	0.005206	224	253
hsa-miR-6824-5p	UBL4B	Miranda_RNAhybrid	-24.06	153	201	223	-36	0.008557	56	77
hsa-miR-6824-5p	FAM212B	Miranda_RNAhybrid	-22.6	151	4574	4597	-33.4	0.222059	1189	1217
hsa-miR-6824-5p	PTPN22	Miranda_RNAhybrid	-27.67	163	876	897	-32.4	0.056658	878	897
hsa-miR-6824-5p	CASQ2	Miranda_RNAhybrid	-22.39	151	305	327	-25.5	0.749251	305	327
hsa-miR-6824-5p	CD101	Miranda_RNAhybrid	-33.46	157	261	281	-36.3	0.002057	260	282
hsa-miR-6824-5p	GDAP2	Miranda_RNAhybrid	-28.5	158	6215	6238	-33.4	0.310595	1243	1265
hsa-miR-6824-5p	LIX1L	Miranda_RNAhybrid	-28.81	152	747	768	-34.6	0.080721	1807	1833
hsa-miR-6824-5p	NOTCH2NL	Miranda_RNAhybrid	-30.59	163	205	227	-31.5	0.35986	205	227
hsa-miR-6824-5p	SV2A	Miranda_RNAhybrid	-28.73	159	756	779	-38	0.00994	1568	1599
hsa-miR-6824-5p	UBE2Q1	Miranda_RNAhybrid	-26.88	150	1492	1513	-35.2	0.036332	1483	1514
hsa-miR-6824-5p	KCNN3	Miranda_RNAhybrid	-28.47	153	3276	3302	-32.3	0.559469	7244	7270
hsa-miR-6824-5p	MEX3A	Miranda_RNAhybrid	-23.7	150	3546	3569	-38	0.038122	4102	4139
hsa-miR-6824-5p	SEMA4A	Miranda_RNAhybrid	-22.44	154	164	185	-31.4	0.051956	486	506
hsa-miR-6824-5p	PMF1-BGLAP	Miranda_RNAhybrid	-27.15	150	33	53	-32.1	0.010274	25	54
hsa-miR-6824-5p	CRABP2	Miranda_RNAhybrid	-30.07	160	164	185	-34.1	0.005733	158	186
hsa-miR-6824-5p	CRP	Miranda_RNAhybrid	-29.43	156	114	135	-34.6	0.026262	112	136
hsa-miR-6824-5p	KCNJ9	Miranda_RNAhybrid	-27.78	162	2331	2355	-37.1	0.028489	2032	2056
hsa-miR-6824-5p	ZBTB37	Miranda_RNAhybrid	-28.52	161	17	37	-31.3	0.11596	19	38
hsa-miR-6824-5p	ASTN1	Miranda_RNAhybrid	-32.85	159	2043	2066	-33.4	0.143773	2434	2461
hsa-miR-6824-5p	C1orf21	Miranda_RNAhybrid	-28.97	161	3782	3801	-35.2	0.228868	7158	7192
hsa-miR-6824-5p	KDM5B	Miranda_RNAhybrid	-34.71	155	747	772	-37.4	0.012065	746	773
hsa-miR-6824-5p	ATP2B4	Miranda_RNAhybrid	-25.38	160	3305	3326	-35.8	0.086792	1735	1758
hsa-miR-6824-5p	ETNK2	Miranda_RNAhybrid	-32.49	158	2	24	-35.7	0.014136	399	429
hsa-miR-6824-5p	LRRN2	Miranda_RNAhybrid	-36.39	171	300	322	-38.6	0.001646	301	323
hsa-miR-6824-5p	SLC45A3	Miranda_RNAhybrid	-29.92	162	1034	1056	-36.7	0.012643	1050	1074
hsa-miR-6824-5p	SLC26A9	Miranda_RNAhybrid	-26.54	159	1730	1751	-34.7	0.058926	250	279
hsa-miR-6824-5p	SRGAP2	Miranda_RNAhybrid	-23.14	150	778	798	-37.2	0.031014	522	548
hsa-miR-6824-5p	CD34	Miranda_RNAhybrid	-27.55	159	662	683	-35.3	0.027406	227	251
hsa-miR-6824-5p	PLXNA2	Miranda_RNAhybrid	-22.83	150	3534	3555	-35	0.128658	4487	4523
hsa-miR-6824-5p	KCNH1	Miranda_RNAhybrid	-23.97	157	4509	4530	-34.8	0.137099	780	828
hsa-miR-6824-5p	C1orf198	Miranda_RNAhybrid	-34.66	174	1104	1124	-38.1	0.019015	1092	1124
hsa-miR-6824-5p	GNG4	Miranda_RNAhybrid	-24.3	150	1181	1204	-33.3	0.20764	1690	1712
hsa-miR-6824-5p	ADARB2	Miranda_RNAhybrid	-22.74	152	4374	4396	-33.7	0.238207	4360	4396
hsa-miR-6824-5p	GATA3	Miranda_RNAhybrid	-25.65	158	212	232	-31	0.114149	2	44
hsa-miR-6824-5p	CELF2	Miranda_RNAhybrid	-33.77	158	146	167	-35.6	0.163339	147	168
hsa-miR-6824-5p	TMEM236	Miranda_RNAhybrid	-21.15	150	814	834	-33.5	0.191127	878	904
hsa-miR-6824-5p	MYO3A	Miranda_RNAhybrid	-29.79	158	270	290	-31.8	0.028743	270	290
hsa-miR-6824-5p	CUL2	Miranda_RNAhybrid	-28.68	155	907	929	-34.9	0.038038	854	878
hsa-miR-6824-5p	VSTM4	Miranda_RNAhybrid	-24.04	151	1243	1269	-34.5	0.168086	1993	2017
hsa-miR-6824-5p	CSTF2T	Miranda_RNAhybrid	-25.12	151	1990	2011	-36.2	0.030551	1983	2012
hsa-miR-6824-5p	TSPAN15	Miranda_RNAhybrid	-29.57	159	169	191	-34.5	0.011343	152	191
hsa-miR-6824-5p	SGPL1	Miranda_RNAhybrid	-28.76	158	1629	1649	-36.9	0.047644	1616	1650
hsa-miR-6824-5p	C10orf54	Miranda_RNAhybrid	-32.2	155	802	824	-38.3	0.026392	3310	3339
hsa-miR-6824-5p	CHCHD1	Miranda_RNAhybrid	-25.42	156	218	239	-30.2	0.043276	213	239
hsa-miR-6824-5p	KCNMA1	Miranda_RNAhybrid	-27.76	155	2334	2356	-31.6	0.568903	2322	2345
hsa-miR-6824-5p	GHITM	Miranda_RNAhybrid	-21.18	151	1085	1106	-29.1	0.245061	1100	1127
hsa-miR-6824-5p	LOC102723625	Miranda_RNAhybrid	-25.01	150	152	176	-30.5	0.013415	26	65
hsa-miR-6824-5p	SLC16A12	Miranda_RNAhybrid	-22.59	152	1457	1478	-33.1	0.135947	1446	1479
hsa-miR-6824-5p	ENTPD1	Miranda_RNAhybrid	-23.26	160	1436	1457	-34.7	0.305074	8580	8618
hsa-miR-6824-5p	ZNF518A	Miranda_RNAhybrid	-27.25	158	1667	1686	-37	0.033126	1662	1686
hsa-miR-6824-5p	GOLGA7B	Miranda_RNAhybrid	-30.18	160	1271	1289	-40	0.024875	1897	1933
hsa-miR-6824-5p	HIF1AN	Miranda_RNAhybrid	-32.35	164	3047	3068	-40.5	0.02047	3043	3069
hsa-miR-6824-5p	BTRC	Miranda_RNAhybrid	-30.75	154	646	669	-34.5	0.128743	644	670
hsa-miR-6824-5p	KCNIP2	Miranda_RNAhybrid	-29.69	150	351	378	-33.3	0.053076	350	378
hsa-miR-6824-5p	PPRC1	Miranda_RNAhybrid	-28.83	156	49	70	-36.5	0.000932	29	71
hsa-miR-6824-5p	C10orf95	Miranda_RNAhybrid	-34.79	167	412	434	-35.9	0.004884	412	435
hsa-miR-6824-5p	CALHM1	Miranda_RNAhybrid	-26.13	159	88	109	-33.5	0.07305	329	355
hsa-miR-6824-5p	SH3PXD2A	Miranda_RNAhybrid	-25.08	154	3980	4001	-33.9	0.288152	1830	1867
hsa-miR-6824-5p	RBM20	Miranda_RNAhybrid	-23.85	157	1500	1520	-36.7	0.045466	482	507
hsa-miR-6824-5p	ATE1	Miranda_RNAhybrid	-26.47	155	626	650	-29.4	0.535946	626	650
hsa-miR-6824-5p	GPR26	Miranda_RNAhybrid	-21.22	155	3721	3743	-33.5	0.374612	1956	1978
hsa-miR-6824-5p	ADAM12	Miranda_RNAhybrid	-23.4	150	3226	3246	-30.5	0.532094	4303	4329
hsa-miR-6824-5p	MKI67	Miranda_RNAhybrid	-24.48	154	1926	1944	-34.8	0.063592	2095	2118
hsa-miR-6824-5p	MYT1L	Miranda_RNAhybrid	-26.65	160	880	901	-31.6	0.233056	2139	2162
hsa-miR-6824-5p	TRIB2	Miranda_RNAhybrid	-23.96	152	1780	1801	-30.4	0.250006	231	264
hsa-miR-6824-5p	FAM84A	Miranda_RNAhybrid	-20.18	156	3575	3596	-32.5	0.31352	3	28
hsa-miR-6824-5p	OSR1	Miranda_RNAhybrid	-25.66	154	181	204	-36.4	0.005889	164	194
hsa-miR-4418	RCL1	Miranda_RNAhybrid	-29.37	170	470	487	-32.1	0.008346	473	488
hsa-miR-4418	RANBP6	Miranda_RNAhybrid	-21.4	154	492	510	-25.2	0.422122	486	511
hsa-miR-4418	NOL6	Miranda_RNAhybrid	-21.74	150	746	764	-25.8	0.345427	739	765
hsa-miR-4418	DCAF12	Miranda_RNAhybrid	-21.05	153	1209	1224	-26.1	0.452253	1210	1224
hsa-miR-4418	HRCT1	Miranda_RNAhybrid	-25.28	157	193	209	-26	0.095617	195	210
hsa-miR-4418	GNE	Miranda_RNAhybrid	-20.82	154	2523	2542	-25.5	0.711803	2525	2542
hsa-miR-4418	DCAF10	Miranda_RNAhybrid	-21.63	150	2706	2722	-25.6	0.919424	2707	2723
hsa-miR-4418	KLF9	Miranda_RNAhybrid	-25.7	157	1751	1769	-28.7	0.272659	1752	1770
hsa-miR-4418	PPP3R2	Miranda_RNAhybrid	-21.85	151	891	911	-26.6	0.510751	892	912
hsa-miR-4418	FKTN	Miranda_RNAhybrid	-22.64	158	5217	5233	-27.4	0.669448	5218	5234
hsa-miR-4418	GPR107	Miranda_RNAhybrid	-23.89	159	2259	2277	-27	0.677252	2260	2278
hsa-miR-4418	NCS1	Miranda_RNAhybrid	-23.06	153	3768	3784	-29.4	0.284165	3761	3785
hsa-miR-4418	C9orf9	Miranda_RNAhybrid	-21.95	156	637	654	-26.1	0.332407	636	654
hsa-miR-4418	TSC1	Miranda_RNAhybrid	-20.28	155	4099	4116	-26.6	0.728036	4101	4116
hsa-miR-4418	EDF1	Miranda_RNAhybrid	-25.75	158	70	86	-29.6	0.006817	71	87
hsa-miR-4418	LCN12	Miranda_RNAhybrid	-24.7	157	315	331	-27.1	0.091951	314	332
hsa-miR-4418	ENTPD8	Miranda_RNAhybrid	-22.44	150	498	514	-26.6	0.079317	494	515
hsa-miR-4418	TPPP	Miranda_RNAhybrid	-24.01	160	1037	1054	-27.1	0.675395	1042	1055
hsa-miR-4418	RAI14	Miranda_RNAhybrid	-31.07	163	337	357	-34.9	0.00833	337	358
hsa-miR-4418	LOC101928448	Miranda_RNAhybrid	-22.81	162	310	327	-27	0.027552	313	328
hsa-miR-4418	SREK1	Miranda_RNAhybrid	-21.49	162	2818	2836	-25	0.921703	2820	2836
hsa-miR-4418	UTP15	Miranda_RNAhybrid	-24.19	167	2176	2193	-27.2	0.478969	2178	2193
hsa-miR-4418	UBE2B	Miranda_RNAhybrid	-25.27	154	1541	1557	-27.8	0.207329	1542	1558
hsa-miR-4418	SH3TC2	Miranda_RNAhybrid	-21.91	154	1181	1197	-26.7	0.992983	1182	1197
hsa-miR-4418	STC2	Miranda_RNAhybrid	-27.8	164	2110	2127	-31.3	0.091225	2111	2128
hsa-miR-4418	N4BP3	Miranda_RNAhybrid	-20.18	150	3501	3517	-26.6	0.661022	3489	3518
hsa-miR-4418	MRPL20	Miranda_RNAhybrid	-22.02	150	538	554	-26.1	0.111859	539	555
hsa-miR-4418	PRKCZ	Miranda_RNAhybrid	-26.57	163	368	385	-29.6	0.065972	370	386
hsa-miR-4418	SKI	Miranda_RNAhybrid	-23.14	150	2145	2161	-26.4	0.627416	2146	2162
hsa-miR-4418	MORN1	Miranda_RNAhybrid	-22.47	160	462	479	-27.3	0.147619	458	480
hsa-miR-4418	KCNAB2	Miranda_RNAhybrid	-27.14	163	1874	1891	-33.7	0.024583	1860	1892
hsa-miR-4418	PHF13	Miranda_RNAhybrid	-25.26	159	209	228	-29.2	0.163575	210	229
hsa-miR-4418	THAP3	Miranda_RNAhybrid	-20.86	152	675	692	-26.2	0.337608	676	693
hsa-miR-4418	TMEM201	Miranda_RNAhybrid	-25.52	157	1652	1668	-26.8	0.461782	1654	1669
hsa-miR-4418	MTHFR	Miranda_RNAhybrid	-25.27	154	4155	4171	-27.8	0.542434	4156	4172
hsa-miR-4418	ARHGEF19	Miranda_RNAhybrid	-24.69	153	52	69	-30.3	0.008816	51	70
hsa-miR-4418	PADI4	Miranda_RNAhybrid	-28.61	163	40	59	-32.9	0.000495	41	60
hsa-miR-4418	LDLRAD2	Miranda_RNAhybrid	-22.45	160	1980	1997	-27.5	0.402329	1981	1997
hsa-miR-4418	ZBTB40	Miranda_RNAhybrid	-21.71	154	3319	3335	-26	0.807715	3320	3336
hsa-miR-4418	EPHB2	Miranda_RNAhybrid	-21.17	153	819	835	-25.2	0.555828	809	836
hsa-miR-4418	TCEB3	Miranda_RNAhybrid	-24.7	167	114	131	-28.8	0.20178	118	131
hsa-miR-4418	WDTC1	Miranda_RNAhybrid	-26.57	163	1731	1748	-29.7	0.122231	1731	1749
hsa-miR-4418	GJB3	Miranda_RNAhybrid	-21.51	159	483	500	-26.9	0.114516	482	501
hsa-miR-4418	PPIE	Miranda_RNAhybrid	-20.85	154	1431	1447	-25	0.840566	1432	1447
hsa-miR-4418	GBP2	Miranda_RNAhybrid	-24.96	154	1261	1281	-28	0.22611	1261	1282
hsa-miR-4418	CYB561D1	Miranda_RNAhybrid	-23.68	155	4488	4507	-28.9	0.364381	4489	4507
hsa-miR-4418	AMPD2	Miranda_RNAhybrid	-24.82	156	829	846	-27.7	0.093393	829	847
hsa-miR-4418	TTF2	Miranda_RNAhybrid	-25.27	154	546	562	-27.8	0.150955	547	563
hsa-miR-4418	CDC42SE1	Miranda_RNAhybrid	-22.85	158	1450	1467	-26.6	0.447282	1444	1468
hsa-miR-4418	ATP8B2	Miranda_RNAhybrid	-22.26	150	651	667	-25.7	0.56042	652	668
hsa-miR-4418	RIT1	Miranda_RNAhybrid	-21.02	151	20	37	-25.2	0.707884	35	68
hsa-miR-4418	MEX3A	Miranda_RNAhybrid	-22.02	151	692	709	-25.6	0.847788	688	710
hsa-miR-4418	C1orf226	Miranda_RNAhybrid	-20.02	156	1824	1842	-26.3	0.606101	1824	1842
hsa-miR-4418	UHMK1	Miranda_RNAhybrid	-22.67	164	2136	2153	-28.3	0.59958	2137	2153
hsa-miR-4418	TBX19	Miranda_RNAhybrid	-25.27	154	837	853	-27.8	0.161849	838	854
hsa-miR-4418	FAM129A	Miranda_RNAhybrid	-23.72	155	2008	2025	-28	0.428912	2932	2948
hsa-miR-4418	RGS2	Miranda_RNAhybrid	-22.88	152	565	582	-25.8	0.160287	565	583
hsa-miR-4418	KDM5B	Miranda_RNAhybrid	-20.89	152	1398	1415	-25.3	0.502143	1380	1416
hsa-miR-4418	PFKFB2	Miranda_RNAhybrid	-20.44	150	589	606	-25.7	0.882862	592	607
hsa-miR-4418	DEGS1	Miranda_RNAhybrid	-21.63	150	510	526	-25.6	0.269275	511	527
hsa-miR-4418	ENAH	Miranda_RNAhybrid	-24.15	161	1380	1397	-26	0.972265	1380	1397
hsa-miR-4418	LOC100506571	Miranda_RNAhybrid	-29.72	162	446	462	-33.2	0.018278	446	463
hsa-miR-4418	IBA57	Miranda_RNAhybrid	-25.27	154	2996	3012	-27.8	0.659383	2997	3013
hsa-miR-4418	TRIM67	Miranda_RNAhybrid	-24.96	152	5080	5098	-26.7	0.790854	5075	5099
hsa-miR-4418	MTR	Miranda_RNAhybrid	-23.04	151	157	177	-27.5	0.683136	158	178
hsa-miR-4418	OPN3	Miranda_RNAhybrid	-20.06	155	1128	1147	-25.5	0.378713	1128	1147
hsa-miR-4418	GATA3	Miranda_RNAhybrid	-21.2	156	29	47	-27.2	0.167903	29	47
hsa-miR-4418	UCMA	Miranda_RNAhybrid	-24.2	155	102	119	-27.1	0.026601	102	120
hsa-miR-4418	ACBD7	Miranda_RNAhybrid	-22.4	158	2934	2950	-27.5	0.40807	2927	2951
hsa-miR-4418	MTPAP	Miranda_RNAhybrid	-21.63	150	1855	1871	-25.8	0.767937	1839	1872
hsa-miR-4418	BMS1	Miranda_RNAhybrid	-25.27	154	1257	1273	-27.8	0.447491	1258	1274
hsa-miR-4418	CAMK2G	Miranda_RNAhybrid	-22.02	152	1659	1676	-25.2	0.61303	1656	1677
hsa-miR-4418	VDAC2	Miranda_RNAhybrid	-28.84	171	191	209	-33.8	0.001171	191	209
hsa-miR-4418	KCNMA1	Miranda_RNAhybrid	-24.89	156	1840	1857	-28.9	0.56512	1841	1858
hsa-miR-4418	ENTPD1	Miranda_RNAhybrid	-26.32	159	10214	10231	-27.4	0.866757	10214	10232
hsa-miR-4418	GOLGA7B	Miranda_RNAhybrid	-20.9	156	2864	2881	-25.1	0.949518	2865	2882
hsa-miR-4418	GBF1	Miranda_RNAhybrid	-21.72	150	291	307	-25.9	0.117481	291	308
hsa-miR-4418	SUFU	Miranda_RNAhybrid	-29.96	168	4	21	-34	0.029859	5	22
hsa-miR-4418	RBM20	Miranda_RNAhybrid	-24.22	159	512	533	-29.4	0.228532	513	533
hsa-miR-4418	ADAM12	Miranda_RNAhybrid	-21.35	156	3684	3701	-27.1	0.647932	3984	4010
hsa-miR-4418	FOXI2	Miranda_RNAhybrid	-22.55	151	534	550	-28.5	0.201515	533	551
hsa-miR-4418	VENTX	Miranda_RNAhybrid	-30.27	159	869	887	-32.6	0.020431	869	888
hsa-miR-4418	TMEM18	Miranda_RNAhybrid	-21.04	152	49	66	-25.7	0.43588	48	67
hsa-miR-6781-5p	C9orf24	Miranda_RNAhybrid	-31.53	157	41	62	-31.3	0.001078	41	63
hsa-miR-6781-5p	FAM219A	Miranda_RNAhybrid	-26.14	150	82	100	-36.3	0.038268	490	508
hsa-miR-6781-5p	LOC100996643	Miranda_RNAhybrid	-24.36	154	302	322	-32.1	0.154876	835	855
hsa-miR-6781-5p	OSTF1	Miranda_RNAhybrid	-25.11	157	1033	1053	-30.5	0.162457	1034	1053
hsa-miR-6781-5p	BICD2	Miranda_RNAhybrid	-28.16	159	1711	1732	-35	0.092152	1704	1732
hsa-miR-6781-5p	KIAA1958	Miranda_RNAhybrid	-26.5	158	3168	3188	-31.9	0.370894	85	111
hsa-miR-6781-5p	TRAF1	Miranda_RNAhybrid	-30.82	157	257	280	-33.8	0.094749	258	280
hsa-miR-6781-5p	MVB12B	Miranda_RNAhybrid	-25.81	153	461	484	-32.5	0.226932	336	360
hsa-miR-6781-5p	LMX1B	Miranda_RNAhybrid	-30.79	156	3220	3241	-37	0.054755	3223	3241
hsa-miR-6781-5p	FAM129B	Miranda_RNAhybrid	-25.33	155	757	775	-32.1	0.093968	790	824
hsa-miR-6781-5p	PIP5KL1	Miranda_RNAhybrid	-30.39	156	497	518	-37.4	0.004972	490	518
hsa-miR-6781-5p	ZER1	Miranda_RNAhybrid	-26.27	155	1338	1358	-32.5	0.084184	363	396
hsa-miR-6781-5p	SH3GLB2	Miranda_RNAhybrid	-31.82	161	738	761	-37.3	0.004445	739	761
hsa-miR-6781-5p	USP20	Miranda_RNAhybrid	-31.26	162	144	167	-35.4	0.02518	145	167
hsa-miR-6781-5p	NCS1	Miranda_RNAhybrid	-27.31	154	3776	3796	-37.7	0.039256	122	150
hsa-miR-6781-5p	PRDM12	Miranda_RNAhybrid	-33.93	157	77	96	-36.9	0.010425	69	97
hsa-miR-6781-5p	FAM78A	Miranda_RNAhybrid	-25.56	150	1131	1151	-41	0.005744	219	245
hsa-miR-6781-5p	PRRC2B	Miranda_RNAhybrid	-24.07	153	2032	2053	-38	0.034874	4206	4226
hsa-miR-6781-5p	RAPGEF1	Miranda_RNAhybrid	-25.9	157	2569	2591	-32	0.193985	2359	2385
hsa-miR-6781-5p	FAM163B	Miranda_RNAhybrid	-26.91	157	1637	1658	-38.5	0.009507	1627	1658
hsa-miR-6781-5p	WDR5	Miranda_RNAhybrid	-26.77	154	1480	1502	-34.9	0.042702	398	424
hsa-miR-6781-5p	RXRA	Miranda_RNAhybrid	-26.36	154	2843	2866	-34.7	0.109	2902	2920
hsa-miR-6781-5p	LCN12	Miranda_RNAhybrid	-23.68	151	636	653	-35.1	0.008736	94	122
hsa-miR-6781-5p	FUT7	Miranda_RNAhybrid	-24.61	154	55	75	-28.8	0.098197	59	75
hsa-miR-6781-5p	RNF208	Miranda_RNAhybrid	-30.91	169	93	113	-36.5	0.00027	79	113
hsa-miR-6781-5p	TOR4A	Miranda_RNAhybrid	-24.69	155	1365	1385	-40.7	0.006255	1353	1385
hsa-miR-6781-5p	NRARP	Miranda_RNAhybrid	-32.83	160	10	29	-36.2	0.024304	1	29
hsa-miR-6781-5p	CCT5	Miranda_RNAhybrid	-30.81	160	553	572	-38	0.008751	544	566
hsa-miR-6781-5p	CD180	Miranda_RNAhybrid	-25	153	285	305	-30.5	0.173792	287	305
hsa-miR-6781-5p	RASGRF2	Miranda_RNAhybrid	-26.47	158	3942	3963	-31.6	0.350313	3942	3963
hsa-miR-6781-5p	LOC101929747	Miranda_RNAhybrid	-28.73	156	514	533	-37.2	0.008767	114	135
hsa-miR-6781-5p	JADE2	Miranda_RNAhybrid	-27.25	152	3812	3831	-32.4	0.242971	3812	3831
hsa-miR-6781-5p	PITX1	Miranda_RNAhybrid	-34.2	155	918	936	-38.6	0.003351	904	937
hsa-miR-6781-5p	NEUROG1	Miranda_RNAhybrid	-28.95	155	175	195	-35.4	0.007108	167	195
hsa-miR-6781-5p	FCHSD1	Miranda_RNAhybrid	-31.96	165	1270	1289	-37.6	0.016436	1258	1289
hsa-miR-6781-5p	PCDH1	Miranda_RNAhybrid	-31.79	156	1	24	-37.1	0.005594	1	24
hsa-miR-6781-5p	DPYSL3	Miranda_RNAhybrid	-20.59	150	2419	2439	-27.8	0.751393	2507	2537
hsa-miR-6781-5p	NDST1	Miranda_RNAhybrid	-28.02	158	4528	4550	-33.6	0.200692	4528	4550
hsa-miR-6781-5p	GM2A	Miranda_RNAhybrid	-29.37	159	412	432	-38.6	0.016601	408	432
hsa-miR-6781-5p	SNCB	Miranda_RNAhybrid	-29.34	150	454	474	-36.1	0.004002	451	475
hsa-miR-6781-5p	DBN1	Miranda_RNAhybrid	-25.4	152	105	124	-37.9	0.003025	517	550
hsa-miR-6781-5p	SCGB3A1	Miranda_RNAhybrid	-27.26	159	84	102	-31.3	0.00208	63	102
hsa-miR-6781-5p	SDF4	Miranda_RNAhybrid	-27.29	152	489	508	-31.9	0.040363	481	508
hsa-miR-6781-5p	UBE2J2	Miranda_RNAhybrid	-28.46	152	907	926	-35.5	0.017194	896	927
hsa-miR-6781-5p	ACAP3	Miranda_RNAhybrid	-24.5	156	1005	1023	-36.4	0.010766	65	87
hsa-miR-6781-5p	VWA1	Miranda_RNAhybrid	-28.55	152	121	140	-34	0.106435	113	140
hsa-miR-6781-5p	ATAD3A	Miranda_RNAhybrid	-27.58	161	48	69	-33.1	0.016771	49	69
hsa-miR-6781-5p	CDK11B	Miranda_RNAhybrid	-25.12	153	426	446	-36.5	0.002703	419	446
hsa-miR-6781-5p	SKI	Miranda_RNAhybrid	-26.49	156	3001	3019	-32.4	0.214455	2926	2943
hsa-miR-6781-5p	MORN1	Miranda_RNAhybrid	-26.24	153	1056	1075	-32.6	0.050445	807	826
hsa-miR-6781-5p	DNAJC11	Miranda_RNAhybrid	-22.06	152	610	628	-34.6	0.033392	710	744
hsa-miR-6781-5p	TMEM201	Miranda_RNAhybrid	-26.47	150	541	563	-35.9	0.042548	280	303
hsa-miR-6781-5p	PEX14	Miranda_RNAhybrid	-27.69	155	453	471	-31.3	0.053643	63	82
hsa-miR-6781-5p	CLCN6	Miranda_RNAhybrid	-29.18	158	2468	2489	-40	0.009404	1936	1962
hsa-miR-6781-5p	EFHD2	Miranda_RNAhybrid	-34.01	158	17	34	-37.7	0.010055	17	34
hsa-miR-6781-5p	MINOS1-NBL1	Miranda_RNAhybrid	-22.68	150	462	482	-31.8	0.090402	1206	1227
hsa-miR-6781-5p	NBL1	Miranda_RNAhybrid	-22.68	150	462	482	-31.8	0.090402	1206	1227
hsa-miR-6781-5p	FAM43B	Miranda_RNAhybrid	-37.24	161	80	99	-38.7	0.003284	80	100
hsa-miR-6781-5p	LDLRAD2	Miranda_RNAhybrid	-26.41	157	1539	1561	-35.3	0.062512	1115	1137
hsa-miR-6781-5p	OPRD1	Miranda_RNAhybrid	-25.84	153	1	17	-33.2	0.008137	213	233
hsa-miR-6781-5p	CCDC28B	Miranda_RNAhybrid	-28.29	160	283	302	-36.2	0.003673	277	302
hsa-miR-6781-5p	HPCA	Miranda_RNAhybrid	-23.89	150	24	41	-29.6	0.115339	36	52
hsa-miR-6781-5p	ZNF362	Miranda_RNAhybrid	-29.58	157	1264	1283	-34.9	0.034105	1264	1283
hsa-miR-6781-5p	DLGAP3	Miranda_RNAhybrid	-25.06	154	108	129	-35	0.007465	94	129
hsa-miR-6781-5p	KIAA0319L	Miranda_RNAhybrid	-34.52	161	848	870	-35.4	0.021524	847	871
hsa-miR-6781-5p	FOXO6	Miranda_RNAhybrid	-25.62	154	569	589	-32.7	0.036399	699	730
hsa-miR-6781-5p	SZT2	Miranda_RNAhybrid	-30.96	153	3085	3106	-36.4	0.054114	3083	3107
hsa-miR-6781-5p	HIST2H2AA3	Miranda_RNAhybrid	-26.36	162	1	17	-36.1	5.3e-05	12	38
hsa-miR-6781-5p	HIST2H2AA4	Miranda_RNAhybrid	-26.36	162	1	17	-36.1	5.3e-05	12	38
hsa-miR-6781-5p	CELF3	Miranda_RNAhybrid	-29.06	152	52	71	-35.2	0.075491	40	71
hsa-miR-6781-5p	IGSF8	Miranda_RNAhybrid	-27.59	158	49	69	-33.2	0.004628	194	212
hsa-miR-6781-5p	CD244	Miranda_RNAhybrid	-23.65	152	373	396	-30.3	0.145138	370	396
hsa-miR-6781-5p	TOMM40L	Miranda_RNAhybrid	-27.61	164	604	623	-32.2	0.101122	602	623
hsa-miR-6781-5p	FAM163A	Miranda_RNAhybrid	-25.68	152	1864	1885	-30.1	0.278962	1862	1885
hsa-miR-6781-5p	ASCL5	Miranda_RNAhybrid	-23.33	153	25	46	-34.3	0.01475	4	27
hsa-miR-6781-5p	ARL8A	Miranda_RNAhybrid	-38.44	158	282	306	-39.2	0.00266	282	307
hsa-miR-6781-5p	SYT2	Miranda_RNAhybrid	-34.65	173	6011	6030	-40.3	0.023072	6012	6030
hsa-miR-6781-5p	WNT3A	Miranda_RNAhybrid	-25.95	152	1516	1534	-33.8	0.059364	1447	1468
hsa-miR-6781-5p	RNF187	Miranda_RNAhybrid	-29.33	161	987	1010	-36.2	0.031005	988	1010
hsa-miR-6781-5p	OR2C3	Miranda_RNAhybrid	-29.77	154	575	596	-35.2	0.023747	348	376
hsa-miR-6781-5p	LARP4B	Miranda_RNAhybrid	-28.01	157	803	822	-36.1	0.104078	804	822
hsa-miR-6781-5p	SFMBT2	Miranda_RNAhybrid	-27.18	152	932	952	-33.9	0.19101	933	952
hsa-miR-6781-5p	UCMA	Miranda_RNAhybrid	-22.76	150	69	89	-27.2	0.103997	71	89
hsa-miR-6781-5p	GPRIN2	Miranda_RNAhybrid	-34.45	167	149	169	-40.6	0.001055	150	169
hsa-miR-6781-5p	C10orf55	Miranda_RNAhybrid	-30.69	150	420	441	-37.2	0.013539	405	442
hsa-miR-6781-5p	ZMIZ1	Miranda_RNAhybrid	-27.96	159	1707	1725	-33.2	0.177343	1707	1725
hsa-miR-6781-5p	ZCCHC24	Miranda_RNAhybrid	-26.54	157	1874	1893	-34.1	0.13754	1872	1893
hsa-miR-6781-5p	SLIT1	Miranda_RNAhybrid	-23.69	150	2328	2345	-36.2	0.045314	378	396
hsa-miR-6781-5p	LBX1	Miranda_RNAhybrid	-28.11	160	110	129	-31.9	0.008369	104	129
hsa-miR-6781-5p	ACSL5	Miranda_RNAhybrid	-25.82	152	5	29	-29.2	0.188904	6	29
hsa-miR-6781-5p	VAX1	Miranda_RNAhybrid	-25.4	153	633	654	-31.2	0.341275	632	654
hsa-miR-6781-5p	LOC102724724	Miranda_RNAhybrid	-28.87	156	169	188	-34.5	0.02802	450	474
hsa-miR-6781-5p	SPRN	Miranda_RNAhybrid	-31.36	158	20	40	-38.7	0.0131	39	68
hsa-miR-6781-5p	SOX11	Miranda_RNAhybrid	-26.88	151	3394	3412	-34.5	0.220623	2765	2789
hsa-miR-6781-5p	FAM84A	Miranda_RNAhybrid	-31.71	154	1	22	-35.5	0.109733	1	22
hsa-miR-6511b-5p	BNC2	Miranda_RNAhybrid	-25.01	160	386	410	-33.8	0.390061	383	410
hsa-miR-6511b-5p	C9orf72	Miranda_RNAhybrid	-20.76	158	1030	1055	-31.5	0.165279	567	593
hsa-miR-6511b-5p	ANKRD18B	Miranda_RNAhybrid	-29.49	176	240	264	-35.3	0.009423	244	264
hsa-miR-6511b-5p	UBAP2	Miranda_RNAhybrid	-24.64	165	299	324	-30.9	0.085374	300	324
hsa-miR-6511b-5p	LOC100996482	Miranda_RNAhybrid	-22.14	153	32	51	-33.5	0.036865	92	111
hsa-miR-6511b-5p	TJP2	Miranda_RNAhybrid	-25.61	162	13	36	-32.2	0.05037	1	36
hsa-miR-6511b-5p	PCSK5	Miranda_RNAhybrid	-22.31	153	3111	3136	-30.2	0.491174	3114	3136
hsa-miR-6511b-5p	GCNT1	Miranda_RNAhybrid	-26.78	154	3386	3407	-29.6	0.608191	3387	3408
hsa-miR-6511b-5p	SHC3	Miranda_RNAhybrid	-22.62	151	4334	4359	-33.1	0.40326	2589	2617
hsa-miR-6511b-5p	FGD3	Miranda_RNAhybrid	-28.93	162	442	465	-36.7	0.004568	438	466
hsa-miR-6511b-5p	PHF2	Miranda_RNAhybrid	-23.69	153	895	919	-30.2	0.300572	894	919
hsa-miR-6511b-5p	BARX1	Miranda_RNAhybrid	-33.74	180	286	311	-39.1	0.001077	287	311
hsa-miR-6511b-5p	FBP1	Miranda_RNAhybrid	-22.05	156	1	19	-30.7	0.014976	1	19
hsa-miR-6511b-5p	NUTM2G	Miranda_RNAhybrid	-28.71	169	1040	1063	-34.3	0.097705	1043	1063
hsa-miR-6511b-5p	TSTD2	Miranda_RNAhybrid	-21.98	153	805	828	-29.2	0.497377	1383	1408
hsa-miR-6511b-5p	STX17	Miranda_RNAhybrid	-28.3	169	3517	3542	-33.3	0.305639	3518	3542
hsa-miR-6511b-5p	TMEM246	Miranda_RNAhybrid	-26.68	151	61	84	-30.3	0.399504	64	85
hsa-miR-6511b-5p	SLC31A2	Miranda_RNAhybrid	-27.32	150	769	792	-32.5	0.073828	761	793
hsa-miR-6511b-5p	DAB2IP	Miranda_RNAhybrid	-26.19	154	2410	2432	-37.5	0.033149	1363	1394
hsa-miR-6511b-5p	TTLL11	Miranda_RNAhybrid	-37.54	173	269	295	-41	0.026367	273	296
hsa-miR-6511b-5p	PTGS1	Miranda_RNAhybrid	-23.16	156	544	570	-29	0.630724	904	939
hsa-miR-6511b-5p	NEK6	Miranda_RNAhybrid	-27.64	159	1276	1298	-32	0.116176	1263	1299
hsa-miR-6511b-5p	ZBTB43	Miranda_RNAhybrid	-25.64	150	3313	3335	-30.7	0.505918	3305	3336
hsa-miR-6511b-5p	RALGPS1	Miranda_RNAhybrid	-27.17	171	1003	1027	-34.6	0.150772	238	278
hsa-miR-6511b-5p	FAM102A	Miranda_RNAhybrid	-23.84	157	658	681	-32.8	0.164587	653	681
hsa-miR-6511b-5p	TBC1D13	Miranda_RNAhybrid	-24.94	151	2262	2284	-32.4	0.185793	461	486
hsa-miR-6511b-5p	SH3GLB2	Miranda_RNAhybrid	-31.35	171	207	231	-41.3	0.000995	182	205
hsa-miR-6511b-5p	FAM73B	Miranda_RNAhybrid	-29.13	164	931	954	-33.4	0.075194	934	955
hsa-miR-6511b-5p	NTMT1	Miranda_RNAhybrid	-23.54	156	533	556	-30.7	0.071327	213	233
hsa-miR-6511b-5p	TOR1A	Miranda_RNAhybrid	-31.71	164	150	172	-35.5	0.016536	147	173
hsa-miR-6511b-5p	ASS1	Miranda_RNAhybrid	-23.78	161	141	164	-32.3	0.006939	136	164
hsa-miR-6511b-5p	ABL1	Miranda_RNAhybrid	-33.62	170	447	467	-42.2	0.002773	18	46
hsa-miR-6511b-5p	AIF1L	Miranda_RNAhybrid	-20.79	157	2781	2804	-28.9	0.603974	637	665
hsa-miR-6511b-5p	RAPGEF1	Miranda_RNAhybrid	-25.94	155	1307	1332	-33.3	0.14381	1303	1333
hsa-miR-6511b-5p	MED27	Miranda_RNAhybrid	-24.91	152	534	559	-31.8	0.048029	542	559
hsa-miR-6511b-5p	MED22	Miranda_RNAhybrid	-29.32	155	1740	1764	-34.4	0.115249	1749	1765
hsa-miR-6511b-5p	DBH	Miranda_RNAhybrid	-20.32	154	259	282	-26.2	0.55504	152	181
hsa-miR-6511b-5p	BRD3	Miranda_RNAhybrid	-22.88	152	651	675	-33.3	0.17565	1507	1529
hsa-miR-6511b-5p	RXRA	Miranda_RNAhybrid	-26.73	151	1773	1795	-31.1	0.427524	3009	3040
hsa-miR-6511b-5p	COL5A1	Miranda_RNAhybrid	-33.47	162	1499	1522	-35.3	0.062078	1500	1523
hsa-miR-6511b-5p	C9orf62	Miranda_RNAhybrid	-33.38	168	1039	1062	-36.3	0.016941	1042	1063
hsa-miR-6511b-5p	SNAPC4	Miranda_RNAhybrid	-25.42	165	48	71	-31.3	0.009987	50	71
hsa-miR-6511b-5p	C9orf163	Miranda_RNAhybrid	-28.88	168	535	558	-35.7	0.014653	535	559
hsa-miR-6511b-5p	NOTCH1	Miranda_RNAhybrid	-29.03	168	930	956	-35.6	0.030727	929	956
hsa-miR-6511b-5p	UAP1L1	Miranda_RNAhybrid	-33.21	167	139	165	-38.4	0.011328	139	166
hsa-miR-6511b-5p	GRIN1	Miranda_RNAhybrid	-25.82	157	911	935	-34.8	0.029111	906	936
hsa-miR-6511b-5p	NDOR1	Miranda_RNAhybrid	-25.34	151	1721	1748	-33.4	0.148652	1881	1908
hsa-miR-6511b-5p	ENTPD8	Miranda_RNAhybrid	-29.27	172	286	310	-33.7	0.013553	267	310
hsa-miR-6511b-5p	PLEKHG4B	Miranda_RNAhybrid	-33.87	156	6758	6785	-36.9	0.121318	6758	6786
hsa-miR-6511b-5p	ANKH	Miranda_RNAhybrid	-34.54	173	3281	3305	-39.3	0.042718	3281	3305
hsa-miR-6511b-5p	MYO10	Miranda_RNAhybrid	-21.72	152	1996	2019	-35.7	0.111877	2087	2121
hsa-miR-6511b-5p	CCDC152	Miranda_RNAhybrid	-20.95	156	2041	2064	-28.5	0.638395	1184	1217
hsa-miR-6511b-5p	MOCS2	Miranda_RNAhybrid	-27.71	153	2108	2135	-31.8	0.262701	2109	2136
hsa-miR-6511b-5p	SKIV2L2	Miranda_RNAhybrid	-23.54	156	49	74	-29.5	0.153018	51	74
hsa-miR-6511b-5p	DEPDC1B	Miranda_RNAhybrid	-22.09	165	628	651	-28.5	0.24238	611	651
hsa-miR-6511b-5p	TRAPPC13	Miranda_RNAhybrid	-24.66	152	591	617	-30	0.256076	591	618
hsa-miR-6511b-5p	NLN	Miranda_RNAhybrid	-25.15	166	477	500	-32.2	0.449172	476	500
hsa-miR-6511b-5p	ARSB	Miranda_RNAhybrid	-22.38	153	551	578	-28.7	0.682949	537	578
hsa-miR-6511b-5p	MTX3	Miranda_RNAhybrid	-25.48	160	5996	6018	-29.8	0.791924	6001	6018
hsa-miR-6511b-5p	SERINC5	Miranda_RNAhybrid	-32.72	179	601	626	-36.6	0.083865	603	626
hsa-miR-6511b-5p	ERAP2	Miranda_RNAhybrid	-25.84	159	355	376	-31.1	0.241065	356	376
hsa-miR-6511b-5p	MCC	Miranda_RNAhybrid	-23.7	154	3119	3142	-28.9	0.81311	3106	3143
hsa-miR-6511b-5p	YTHDC2	Miranda_RNAhybrid	-22.97	154	924	947	-28.9	0.437226	748	770
hsa-miR-6511b-5p	SOWAHA	Miranda_RNAhybrid	-22.89	153	127	150	-30.1	0.248673	112	150
hsa-miR-6511b-5p	TCF7	Miranda_RNAhybrid	-26.2	162	525	548	-32.6	0.132201	125	168
hsa-miR-6511b-5p	SPOCK1	Miranda_RNAhybrid	-26.14	155	825	850	-36	0.066753	829	851
hsa-miR-6511b-5p	GFRA3	Miranda_RNAhybrid	-21.41	162	438	461	-26.4	0.360325	442	461
hsa-miR-6511b-5p	PFDN1	Miranda_RNAhybrid	-23.71	158	496	521	-31.2	0.089344	500	521
hsa-miR-6511b-5p	WDR55	Miranda_RNAhybrid	-31.94	168	114	138	-38.8	0.004496	108	139
hsa-miR-6511b-5p	RELL2	Miranda_RNAhybrid	-23.18	158	176	199	-36.4	0.002142	163	199
hsa-miR-6511b-5p	ARHGAP26	Miranda_RNAhybrid	-23.95	164	1430	1452	-29.1	0.853794	1431	1452
hsa-miR-6511b-5p	LOC102723997	Miranda_RNAhybrid	-25.96	162	127	154	-32.8	0.004994	127	154
hsa-miR-6511b-5p	KCTD16	Miranda_RNAhybrid	-24.08	152	2618	2640	-41.5	0.011821	3433	3460
hsa-miR-6511b-5p	ARHGEF37	Miranda_RNAhybrid	-25.96	169	307	330	-31.5	0.276715	307	330
hsa-miR-6511b-5p	PPARGC1B	Miranda_RNAhybrid	-34.41	174	3809	3832	-37.6	0.09294	3809	3833
hsa-miR-6511b-5p	SLC6A7	Miranda_RNAhybrid	-28.56	155	39	65	-33.3	0.067875	41	65
hsa-miR-6511b-5p	NDST1	Miranda_RNAhybrid	-22.32	158	3330	3353	-31.6	0.43462	175	199
hsa-miR-6511b-5p	GPX3	Miranda_RNAhybrid	-24.93	157	274	299	-30	0.134936	275	300
hsa-miR-6511b-5p	FAXDC2	Miranda_RNAhybrid	-23.44	159	1456	1482	-31.6	0.311636	2005	2049
hsa-miR-6511b-5p	NIPAL4	Miranda_RNAhybrid	-23.72	156	214	239	-32.8	0.104243	1699	1727
hsa-miR-6511b-5p	UBLCP1	Miranda_RNAhybrid	-22.86	158	931	954	-29.3	0.238247	598	620
hsa-miR-6511b-5p	FOXI1	Miranda_RNAhybrid	-27.76	157	202	225	-34.4	0.029756	665	687
hsa-miR-6511b-5p	RANBP17	Miranda_RNAhybrid	-25.51	165	653	676	-32.4	0.072722	636	677
hsa-miR-6511b-5p	SH3PXD2B	Miranda_RNAhybrid	-20.25	151	1900	1922	-32.9	0.294212	1010	1041
hsa-miR-6511b-5p	BNIP1	Miranda_RNAhybrid	-27.07	159	98	119	-32.7	0.016665	98	120
hsa-miR-6511b-5p	RNF44	Miranda_RNAhybrid	-28.38	170	94	117	-37.3	0.02527	91	117
hsa-miR-6511b-5p	UNC5A	Miranda_RNAhybrid	-29.21	163	441	465	-37.7	0.006167	436	466
hsa-miR-6511b-5p	NSD1	Miranda_RNAhybrid	-20.63	156	3870	3893	-26.3	0.983804	3858	3893
hsa-miR-6511b-5p	PRELID1	Miranda_RNAhybrid	-27.1	154	237	259	-32.7	0.012308	240	260
hsa-miR-6511b-5p	DBN1	Miranda_RNAhybrid	-26.35	154	61	82	-32.4	0.044802	47	82
hsa-miR-6511b-5p	DOK3	Miranda_RNAhybrid	-24.12	160	256	280	-32.8	0.06019	291	327
hsa-miR-6511b-5p	TBC1D9B	Miranda_RNAhybrid	-23.36	151	167	189	-28.6	0.377682	147	189
hsa-miR-6511b-5p	C1orf159	Miranda_RNAhybrid	-30.91	151	290	310	-34.7	0.024861	289	311
hsa-miR-6511b-5p	VWA1	Miranda_RNAhybrid	-24.31	153	963	987	-33.1	0.177159	1612	1632
hsa-miR-6511b-5p	PRDM16	Miranda_RNAhybrid	-28.05	153	2132	2155	-36.7	0.077583	2115	2156
hsa-miR-6511b-5p	DNAJC11	Miranda_RNAhybrid	-25.07	159	740	763	-32.7	0.090248	897	919
hsa-miR-6511b-5p	VAMP3	Miranda_RNAhybrid	-21.92	161	1111	1137	-29.7	0.334039	1678	1700
hsa-miR-6511b-5p	DFFA	Miranda_RNAhybrid	-26.45	157	1419	1442	-32.4	0.181934	1486	1512
hsa-miR-6511b-5p	TNFRSF1B	Miranda_RNAhybrid	-28.95	160	1133	1161	-37.1	0.025326	146	169
hsa-miR-6511b-5p	PADI1	Miranda_RNAhybrid	-21.29	157	1482	1507	-27.6	0.61319	1480	1507
hsa-miR-6511b-5p	PAX7	Miranda_RNAhybrid	-27.92	170	999	1024	-35.6	0.093334	992	1024
hsa-miR-6511b-5p	ALDH4A1	Miranda_RNAhybrid	-25.44	150	1140	1163	-34.6	0.038282	925	956
hsa-miR-6511b-5p	PLA2G2F	Miranda_RNAhybrid	-26.35	162	937	964	-33.3	0.099785	933	964
hsa-miR-6511b-5p	MUL1	Miranda_RNAhybrid	-23.15	155	560	583	-30.8	0.151865	838	865
hsa-miR-6511b-5p	ECE1	Miranda_RNAhybrid	-39.04	172	1578	1606	-42.8	0.003522	1580	1607
hsa-miR-6511b-5p	WNT4	Miranda_RNAhybrid	-25.39	150	1826	1849	-31.3	0.292611	1832	1850
hsa-miR-6511b-5p	E2F2	Miranda_RNAhybrid	-33.99	173	57	77	-39.7	0.016822	56	77
hsa-miR-6511b-5p	CNR2	Miranda_RNAhybrid	-32.03	168	262	287	-37	0.057005	262	287
hsa-miR-6511b-5p	NIPAL3	Miranda_RNAhybrid	-20.37	150	2111	2134	-33.2	0.210883	1219	1240
hsa-miR-6511b-5p	RUNX3	Miranda_RNAhybrid	-26.12	161	1319	1342	-31.6	0.251981	1319	1342
hsa-miR-6511b-5p	RHD	Miranda_RNAhybrid	-25.66	170	99	122	-30.2	0.247824	104	122
hsa-miR-6511b-5p	EXTL1	Miranda_RNAhybrid	-33.46	176	901	927	-39.2	0.003806	903	927
hsa-miR-6511b-5p	WDTC1	Miranda_RNAhybrid	-21.21	155	422	447	-29.3	0.461703	412	447
hsa-miR-6511b-5p	WASF2	Miranda_RNAhybrid	-22.16	154	1950	1974	-34.9	0.121098	1942	1974
hsa-miR-6511b-5p	KPNA6	Miranda_RNAhybrid	-25.72	154	628	649	-32.6	0.367136	4476	4498
hsa-miR-6511b-5p	TXLNA	Miranda_RNAhybrid	-23.06	156	693	716	-32.2	0.239605	2233	2273
hsa-miR-6511b-5p	TMEM234	Miranda_RNAhybrid	-29.74	153	2112	2133	-35.2	0.058945	2112	2134
hsa-miR-6511b-5p	FNDC5	Miranda_RNAhybrid	-24.71	151	1873	1895	-31.1	0.268956	865	887
hsa-miR-6511b-5p	GJB3	Miranda_RNAhybrid	-22.92	155	234	256	-29.4	0.15717	194	256
hsa-miR-6511b-5p	AGO4	Miranda_RNAhybrid	-21.17	151	3983	4005	-26.6	0.965334	1519	1544
hsa-miR-6511b-5p	STK40	Miranda_RNAhybrid	-22.09	150	911	934	-32	0.177519	1548	1570
hsa-miR-6511b-5p	GRIK3	Miranda_RNAhybrid	-29.86	166	5009	5032	-34.4	0.231148	5007	5033
hsa-miR-6511b-5p	SNIP1	Miranda_RNAhybrid	-25.36	153	203	222	-31.7	0.304125	195	223
hsa-miR-6511b-5p	CDCA8	Miranda_RNAhybrid	-31.03	166	310	331	-35.5	0.024713	311	332
hsa-miR-6511b-5p	MANEAL	Miranda_RNAhybrid	-26.41	158	376	402	-32.5	0.089423	378	402
hsa-miR-6511b-5p	MYCL	Miranda_RNAhybrid	-23.74	151	336	357	-31.3	0.207765	335	357
hsa-miR-6511b-5p	RIMS3	Miranda_RNAhybrid	-25.67	150	2348	2371	-36.8	0.094121	1234	1260
hsa-miR-6511b-5p	KCNQ4	Miranda_RNAhybrid	-25.91	158	1547	1569	-35	0.049237	1251	1278
hsa-miR-6511b-5p	HIVEP3	Miranda_RNAhybrid	-27.5	173	1823	1846	-34	0.172288	3135	3162
hsa-miR-6511b-5p	MKNK1	Miranda_RNAhybrid	-27.56	157	227	251	-34.5	0.030519	270	297
hsa-miR-6511b-5p	TRABD2B	Miranda_RNAhybrid	-28.64	154	935	964	-33.3	0.283117	934	965
hsa-miR-6511b-5p	ACOT11	Miranda_RNAhybrid	-28.27	153	1059	1082	-32.5	0.074785	1048	1083
hsa-miR-6511b-5p	TTC4	Miranda_RNAhybrid	-26.79	154	995	1020	-31.1	0.122074	1003	1021
hsa-miR-6511b-5p	DHCR24	Miranda_RNAhybrid	-24.23	150	665	688	-37	0.033056	652	689
hsa-miR-6511b-5p	RAVER2	Miranda_RNAhybrid	-27.62	161	721	744	-36.2	0.037289	714	744
hsa-miR-6511b-5p	TCTEX1D1	Miranda_RNAhybrid	-21.52	151	596	621	-32.2	0.117733	599	621
hsa-miR-6511b-5p	SLC35D1	Miranda_RNAhybrid	-22.44	153	3368	3391	-29.3	0.748523	3358	3391
hsa-miR-6511b-5p	HHLA3	Miranda_RNAhybrid	-20.81	160	357	379	-29	0.077488	322	379
hsa-miR-6511b-5p	LPHN2	Miranda_RNAhybrid	-22.98	160	346	373	-29.2	0.286752	345	373
hsa-miR-6511b-5p	LMO4	Miranda_RNAhybrid	-24.59	154	1476	1502	-29.9	0.601161	1471	1502
hsa-miR-6511b-5p	DBT	Miranda_RNAhybrid	-25.37	156	5819	5841	-30.7	0.766181	2485	2516
hsa-miR-6511b-5p	ATP5F1	Miranda_RNAhybrid	-20.73	156	638	660	-30.4	0.124619	634	660
hsa-miR-6511b-5p	PTGFRN	Miranda_RNAhybrid	-26.13	154	2958	2982	-34.9	0.101204	2936	2983
hsa-miR-6511b-5p	GDAP2	Miranda_RNAhybrid	-25.24	164	867	893	-28.7	0.907704	868	893
hsa-miR-6511b-5p	WARS2	Miranda_RNAhybrid	-25.16	165	253	278	-31.1	0.190434	235	279
hsa-miR-6511b-5p	REG4	Miranda_RNAhybrid	-25.51	164	385	411	-31.1	0.051385	386	411
hsa-miR-6511b-5p	LIX1L	Miranda_RNAhybrid	-24.53	159	793	814	-32.5	0.200879	780	815
hsa-miR-6511b-5p	TNFAIP8L2-SCNM1	Miranda_RNAhybrid	-22.76	164	106	133	-28.3	0.372529	1049	1073
hsa-miR-6511b-5p	SCNM1	Miranda_RNAhybrid	-22.76	164	106	133	-28.3	0.372529	1049	1073
hsa-miR-6511b-5p	POGZ	Miranda_RNAhybrid	-21.21	156	1973	1995	-32.6	0.137644	1969	1995
hsa-miR-6511b-5p	THEM5	Miranda_RNAhybrid	-26.86	156	1	18	-31	0.185067	1	19
hsa-miR-6511b-5p	LCE1A	Miranda_RNAhybrid	-24.79	154	63	86	-30.3	0.024233	65	86
hsa-miR-6511b-5p	S100A14	Miranda_RNAhybrid	-20.33	152	74	98	-27.2	0.286838	61	98
hsa-miR-6511b-5p	TPM3	Miranda_RNAhybrid	-23.58	154	462	484	-32.2	0.436458	3608	3639
hsa-miR-6511b-5p	ATP8B2	Miranda_RNAhybrid	-31.45	159	643	665	-35.2	0.05344	647	666
hsa-miR-6511b-5p	EFNA4	Miranda_RNAhybrid	-24.21	162	62	84	-31.5	0.039151	62	84
hsa-miR-6511b-5p	FCRL4	Miranda_RNAhybrid	-36.02	183	486	512	-42	0.002499	489	512
hsa-miR-6511b-5p	C1orf204	Miranda_RNAhybrid	-25.77	152	1021	1044	-32	0.136304	996	1045
hsa-miR-6511b-5p	CD84	Miranda_RNAhybrid	-29.81	160	3406	3428	-32.5	0.45121	3406	3429
hsa-miR-6511b-5p	FCER1G	Miranda_RNAhybrid	-26.8	174	57	80	-32.7	0.008018	57	80
hsa-miR-6511b-5p	POGK	Miranda_RNAhybrid	-28.25	152	798	820	-36	0.032199	786	821
hsa-miR-6511b-5p	POU2F1	Miranda_RNAhybrid	-30.69	158	11334	11357	-33.8	0.449468	6219	6245
hsa-miR-6511b-5p	GPR161	Miranda_RNAhybrid	-24.53	151	1507	1530	-33.7	0.274948	1511	1530
hsa-miR-6511b-5p	SUCO	Miranda_RNAhybrid	-20.11	152	894	919	-32.4	0.107265	886	919
hsa-miR-6511b-5p	KIAA0040	Miranda_RNAhybrid	-30.6	182	2686	2709	-35.2	0.10154	2672	2709
hsa-miR-6511b-5p	RASAL2	Miranda_RNAhybrid	-20.22	155	4811	4835	-29.2	0.835817	4793	4835
hsa-miR-6511b-5p	RGL1	Miranda_RNAhybrid	-27.34	168	620	645	-34.5	0.072496	621	645
hsa-miR-6511b-5p	C1orf21	Miranda_RNAhybrid	-31.85	182	1492	1515	-36.1	0.195041	1493	1516
hsa-miR-6511b-5p	DENND1B	Miranda_RNAhybrid	-22.01	154	2868	2891	-30	0.7027	1132	1160
hsa-miR-6511b-5p	IGFN1	Miranda_RNAhybrid	-26.68	152	290	311	-31.1	0.045578	281	312
hsa-miR-6511b-5p	PKP1	Miranda_RNAhybrid	-20.57	158	838	861	-32.8	0.187571	829	861
hsa-miR-6511b-5p	TNNT2	Miranda_RNAhybrid	-22.07	157	34	58	-29.8	0.015518	35	58
hsa-miR-6511b-5p	TNNI1	Miranda_RNAhybrid	-21.65	158	108	131	-35.7	0.129554	101	131
hsa-miR-6511b-5p	ELF3	Miranda_RNAhybrid	-25.85	152	26	51	-30.2	0.293584	30	51
hsa-miR-6511b-5p	SYT2	Miranda_RNAhybrid	-34.6	178	4474	4497	-40.5	0.026396	4473	4498
hsa-miR-6511b-5p	MYBPH	Miranda_RNAhybrid	-27.31	166	323	346	-34	0.016624	315	347
hsa-miR-6511b-5p	PRELP	Miranda_RNAhybrid	-22.35	156	4414	4436	-35.2	0.124168	592	618
hsa-miR-6511b-5p	CNTN2	Miranda_RNAhybrid	-31.13	170	911	934	-36.7	0.068587	902	935
hsa-miR-6511b-5p	NUCKS1	Miranda_RNAhybrid	-22.69	154	3387	3412	-28.6	0.859391	3395	3412
hsa-miR-6511b-5p	DIEXF	Miranda_RNAhybrid	-34.5	175	2426	2452	-39.2	0.042001	2428	2453
hsa-miR-6511b-5p	NSL1	Miranda_RNAhybrid	-20.13	150	1	23	-29.8	0.926518	7964	7988
hsa-miR-6511b-5p	VASH2	Miranda_RNAhybrid	-20.11	151	1211	1236	-32.2	0.232797	1199	1236
hsa-miR-6511b-5p	ANGEL2	Miranda_RNAhybrid	-20.08	157	570	594	-29.9	0.472862	566	594
hsa-miR-6511b-5p	FBXO28	Miranda_RNAhybrid	-21.52	158	3260	3285	-28.8	0.767075	2518	2542
hsa-miR-6511b-5p	C1orf95	Miranda_RNAhybrid	-21.28	162	2686	2708	-35	0.214244	2672	2708
hsa-miR-6511b-5p	ITPKB	Miranda_RNAhybrid	-24.63	154	884	905	-31.2	0.326094	884	905
hsa-miR-6511b-5p	RNF187	Miranda_RNAhybrid	-28.17	157	820	843	-31.1	0.264574	825	844
hsa-miR-6511b-5p	EDARADD	Miranda_RNAhybrid	-26.51	161	852	874	-32.7	0.131144	854	874
hsa-miR-6511b-5p	EXO1	Miranda_RNAhybrid	-25.02	165	8	31	-32	0.013616	7	31
hsa-miR-6511b-5p	ZNF496	Miranda_RNAhybrid	-25.62	158	414	436	-31.8	0.278163	417	436
hsa-miR-6511b-5p	ZNF672	Miranda_RNAhybrid	-22.85	150	563	586	-30.5	0.112746	559	586
hsa-miR-6511b-5p	ADARB2	Miranda_RNAhybrid	-25.73	158	4429	4451	-35.2	0.165255	3107	3141
hsa-miR-6511b-5p	PFKP	Miranda_RNAhybrid	-34.43	163	1	27	-37.6	0.000361	2	28
hsa-miR-6511b-5p	CALML3	Miranda_RNAhybrid	-23.92	151	469	492	-29.7	0.123132	454	493
hsa-miR-6511b-5p	PFKFB3	Miranda_RNAhybrid	-27.79	155	1043	1073	-33.1	0.14878	1044	1073
hsa-miR-6511b-5p	CELF2	Miranda_RNAhybrid	-24.25	161	6504	6529	-31	0.667216	6513	6529
hsa-miR-6511b-5p	CCDC3	Miranda_RNAhybrid	-21.61	152	253	278	-32.3	0.130044	244	279
hsa-miR-6511b-5p	UCMA	Miranda_RNAhybrid	-26.29	154	201	224	-32	0.01307	82	118
hsa-miR-6511b-5p	DCLRE1C	Miranda_RNAhybrid	-25.95	162	1263	1286	-31.5	0.366277	1267	1286
hsa-miR-6511b-5p	ARL5B	Miranda_RNAhybrid	-32.66	180	649	674	-37.5	0.081674	650	674
hsa-miR-6511b-5p	C10orf67	Miranda_RNAhybrid	-27.29	159	2160	2181	-32	0.193865	2069	2111
hsa-miR-6511b-5p	KIAA1462	Miranda_RNAhybrid	-26.31	150	391	414	-33.7	0.236529	381	415
hsa-miR-6511b-5p	BMS1	Miranda_RNAhybrid	-26.31	158	110	133	-31.9	0.326862	107	134
hsa-miR-6511b-5p	RET	Miranda_RNAhybrid	-24.18	153	875	897	-30.2	0.325895	868	898
hsa-miR-6511b-5p	ZNF488	Miranda_RNAhybrid	-32.66	166	444	468	-36.8	0.030504	446	469
hsa-miR-6511b-5p	MAPK8	Miranda_RNAhybrid	-23.29	150	3023	3046	-29.6	0.660771	3022	3046
hsa-miR-6511b-5p	VSTM4	Miranda_RNAhybrid	-24.31	150	4738	4761	-33.4	0.275721	4736	4761
hsa-miR-6511b-5p	C10orf128	Miranda_RNAhybrid	-21.81	155	521	544	-26	0.78354	525	545
hsa-miR-6511b-5p	ERCC6	Miranda_RNAhybrid	-23.42	160	2796	2818	-32	0.351661	91	119
hsa-miR-6511b-5p	SLC18A3	Miranda_RNAhybrid	-24.82	155	259	286	-31.1	0.025542	259	286
hsa-miR-6511b-5p	PCDH15	Miranda_RNAhybrid	-27.38	161	3363	3386	-31.2	0.4017	3360	3386
hsa-miR-6511b-5p	JMJD1C	Miranda_RNAhybrid	-23.34	163	409	433	-28	0.283497	395	433
hsa-miR-6511b-5p	HERC4	Miranda_RNAhybrid	-20.58	159	350	374	-27.2	0.460038	346	374
hsa-miR-6511b-5p	TET1	Miranda_RNAhybrid	-24.91	151	2089	2119	-31.1	0.304464	2090	2119
hsa-miR-6511b-5p	EIF4EBP2	Miranda_RNAhybrid	-23.43	163	3576	3601	-32.7	0.414453	5902	5930
hsa-miR-6511b-5p	SGPL1	Miranda_RNAhybrid	-28.5	161	948	971	-36.8	0.058387	3567	3593
hsa-miR-6511b-5p	C10orf105	Miranda_RNAhybrid	-25.37	157	3107	3128	-34.1	0.172644	3148	3186
hsa-miR-6511b-5p	C10orf54	Miranda_RNAhybrid	-22.66	153	596	619	-31.2	0.392173	1481	1501
hsa-miR-6511b-5p	PSAP	Miranda_RNAhybrid	-24.72	172	812	835	-36.1	0.014958	809	835
hsa-miR-6511b-5p	SPOCK2	Miranda_RNAhybrid	-23.82	159	1398	1423	-35.6	0.086667	474	522
hsa-miR-6511b-5p	VCL	Miranda_RNAhybrid	-26.58	156	869	893	-33.6	0.089119	863	894
hsa-miR-6511b-5p	ZMIZ1	Miranda_RNAhybrid	-27.56	165	1307	1328	-34.3	0.142409	1306	1328
hsa-miR-6511b-5p	CCSER2	Miranda_RNAhybrid	-25.45	151	812	836	-30.5	0.585624	810	836
hsa-miR-6511b-5p	PTEN	Miranda_RNAhybrid	-27.66	166	1021	1045	-34	0.205618	1020	1045
hsa-miR-6511b-5p	TLL2	Miranda_RNAhybrid	-21.08	152	2460	2479	-32.9	0.217319	2429	2479
hsa-miR-6511b-5p	PGAM1	Miranda_RNAhybrid	-21.77	162	148	171	-31.9	0.065778	363	407
hsa-miR-6511b-5p	MARVELD1	Miranda_RNAhybrid	-22.52	157	1670	1693	-35.3	0.062259	2015	2038
hsa-miR-6511b-5p	ZFYVE27	Miranda_RNAhybrid	-31.16	160	434	456	-35.8	0.027653	435	457
hsa-miR-6511b-5p	GOLGA7B	Miranda_RNAhybrid	-23.88	152	5430	5454	-30.5	0.644755	5429	5454
hsa-miR-6511b-5p	GOT1	Miranda_RNAhybrid	-24.15	153	39	63	-32.2	0.037523	43	63
hsa-miR-6511b-5p	HIF1AN	Miranda_RNAhybrid	-30.1	162	4444	4467	-37.2	0.080882	4434	4468
hsa-miR-6511b-5p	C10orf76	Miranda_RNAhybrid	-24.25	155	465	486	-31	0.229194	468	486
hsa-miR-6511b-5p	SUFU	Miranda_RNAhybrid	-31.21	163	247	269	-33.6	0.158722	247	270
hsa-miR-6511b-5p	WBP1L	Miranda_RNAhybrid	-23.04	163	982	1005	-32.3	0.222095	992	1026
hsa-miR-6511b-5p	OBFC1	Miranda_RNAhybrid	-22.21	150	4846	4869	-30.3	0.623725	2831	2859
hsa-miR-6511b-5p	GSTO2	Miranda_RNAhybrid	-23.12	158	989	1012	-31.6	0.463946	4236	4260
hsa-miR-6511b-5p	MXI1	Miranda_RNAhybrid	-20.11	161	1335	1359	-30.2	0.367352	804	830
hsa-miR-6511b-5p	RBM20	Miranda_RNAhybrid	-24.87	158	1030	1050	-31.3	0.362721	1031	1050
hsa-miR-6511b-5p	GPAM	Miranda_RNAhybrid	-24.51	157	173	196	-32.9	0.226706	167	197
hsa-miR-6511b-5p	NHLRC2	Miranda_RNAhybrid	-22.36	161	3122	3145	-28.9	0.727065	3123	3145
hsa-miR-6511b-5p	GFRA1	Miranda_RNAhybrid	-29.16	153	4787	4812	-31.2	0.633715	4787	4813
hsa-miR-6511b-5p	CCDC172	Miranda_RNAhybrid	-22.71	150	610	633	-33.1	0.02475	605	634
hsa-miR-6511b-5p	HSPA12A	Miranda_RNAhybrid	-25.56	156	1126	1150	-31.5	0.353504	1110	1150
hsa-miR-6511b-5p	VAX1	Miranda_RNAhybrid	-25.17	155	581	608	-36.2	0.069307	576	608
hsa-miR-6511b-5p	LOC102724724	Miranda_RNAhybrid	-30.55	160	90	110	-35.5	0.023152	91	110
hsa-miR-6511b-5p	BCCIP	Miranda_RNAhybrid	-22.37	152	539	561	-28.4	0.422616	528	561
hsa-miR-6511b-5p	FOXI2	Miranda_RNAhybrid	-28.5	159	1710	1732	-38.9	0.012668	1695	1733
hsa-miR-6511b-5p	PWWP2B	Miranda_RNAhybrid	-25.11	150	620	643	-35.5	0.011292	607	644
hsa-miR-6511b-5p	VENTX	Miranda_RNAhybrid	-25.77	156	1268	1294	-30.3	0.245847	1263	1295
hsa-miR-6511b-5p	CYS1	Miranda_RNAhybrid	-27.3	155	1154	1175	-35.9	0.037313	862	886
hsa-miR-6511b-5p	FAM84A	Miranda_RNAhybrid	-29.18	166	4987	5015	-34.6	0.178641	4987	5015
hsa-miR-552-5p	C9orf47	Miranda_RNAhybrid	-22.19	162	1822	1844	-26.2	0.743053	1822	1845
hsa-miR-552-5p	SLC44A1	Miranda_RNAhybrid	-23.23	155	941	961	-25.2	0.982185	943	962
hsa-miR-552-5p	POLK	Miranda_RNAhybrid	-21.12	161	2634	2657	-25.1	0.81078	2633	2658
hsa-miR-552-5p	LNPEP	Miranda_RNAhybrid	-21.69	177	657	679	-25.6	0.2539	655	680
hsa-miR-552-5p	UCK2	Miranda_RNAhybrid	-23.55	166	2868	2888	-26.9	0.595229	2869	2889
hsa-miR-552-5p	PAPPA2	Miranda_RNAhybrid	-22.05	154	1238	1266	-27.1	0.490156	1239	1267
hsa-miR-552-5p	CNTN2	Miranda_RNAhybrid	-23.52	158	3158	3182	-26.8	0.65806	3158	3183
hsa-miR-1183	PTPRD	Miranda_RNAhybrid	-22.47	154	710	742	-31.2	0.514033	2770	2816
hsa-miR-1183	BNC2	Miranda_RNAhybrid	-20.76	159	9329	9354	-30.1	0.922844	9308	9354
hsa-miR-1183	MTAP	Miranda_RNAhybrid	-24.1	159	854	880	-29.8	0.735571	1527	1554
hsa-miR-1183	LRRC19	Miranda_RNAhybrid	-20.63	161	624	650	-28.6	0.721578	619	650
hsa-miR-1183	DDX58	Miranda_RNAhybrid	-22.38	150	781	807	-31.2	0.297656	757	808
hsa-miR-1183	RPP25L	Miranda_RNAhybrid	-33.87	174	218	244	-35.8	0.003826	218	245
hsa-miR-1183	KIAA1045	Miranda_RNAhybrid	-23	161	3021	3047	-35.1	0.193786	3016	3047
hsa-miR-1183	VCP	Miranda_RNAhybrid	-25.9	176	109	137	-34.5	0.044899	97	137
hsa-miR-1183	DCAF10	Miranda_RNAhybrid	-22.64	150	5081	5107	-32.2	0.573353	1016	1055
hsa-miR-1183	RORB	Miranda_RNAhybrid	-20.9	152	124	146	-27	0.791481	106	146
hsa-miR-1183	OSTF1	Miranda_RNAhybrid	-22.15	165	979	1003	-29.5	0.398883	978	1004
hsa-miR-1183	RFK	Miranda_RNAhybrid	-24.98	163	1241	1270	-30.3	0.403256	1241	1270
hsa-miR-1183	GNAQ	Miranda_RNAhybrid	-25.58	170	1694	1719	-30.7	0.700579	3217	3251
hsa-miR-1183	TRIM14	Miranda_RNAhybrid	-36.51	169	116	150	-40.6	0.018272	114	151
hsa-miR-1183	TGFBR1	Miranda_RNAhybrid	-20.01	155	4276	4304	-30.9	0.663201	1567	1599
hsa-miR-1183	FKTN	Miranda_RNAhybrid	-23.02	165	3581	3605	-26.8	0.995998	5201	5234
hsa-miR-1183	PALM2-AKAP2	Miranda_RNAhybrid	-24.63	163	2624	2652	-30.4	0.659826	723	755
hsa-miR-1183	AKAP2	Miranda_RNAhybrid	-24.63	163	2624	2652	-30.4	0.659826	723	755
hsa-miR-1183	PTBP3	Miranda_RNAhybrid	-20.45	154	5750	5779	-29.3	0.906217	1840	1865
hsa-miR-1183	ALAD	Miranda_RNAhybrid	-29.25	171	1882	1908	-35	0.083491	1867	1909
hsa-miR-1183	ZNF618	Miranda_RNAhybrid	-20.61	160	1062	1086	-30.7	0.777773	1051	1086
hsa-miR-1183	RAB14	Miranda_RNAhybrid	-26.72	156	1179	1208	-30.8	0.532295	1957	1985
hsa-miR-1183	LHX6	Miranda_RNAhybrid	-22.33	150	451	481	-30.6	0.417097	444	482
hsa-miR-1183	HSPA5	Miranda_RNAhybrid	-27.7	161	1566	1592	-38	0.022314	1559	1593
hsa-miR-1183	GPR107	Miranda_RNAhybrid	-21.43	156	61	87	-36.7	0.129698	2244	2278
hsa-miR-1183	C5orf49	Miranda_RNAhybrid	-26.9	156	118	142	-32.4	0.155205	118	143
hsa-miR-1183	CCT5	Miranda_RNAhybrid	-24.22	171	49	76	-26	0.909017	44	76
hsa-miR-1183	MYO10	Miranda_RNAhybrid	-34.93	174	2996	3022	-36	0.155548	2995	3023
hsa-miR-1183	PDZD2	Miranda_RNAhybrid	-21.05	165	1831	1857	-26.1	0.979904	1759	1803
hsa-miR-1183	GOLPH3	Miranda_RNAhybrid	-21.35	161	353	381	-28.7	0.530865	348	381
hsa-miR-1183	ZFR	Miranda_RNAhybrid	-24.59	161	1267	1291	-29.3	0.427612	1047	1081
hsa-miR-1183	IL7R	Miranda_RNAhybrid	-22.14	154	2966	2992	-29.3	0.720426	2956	2993
hsa-miR-1183	SKP2	Miranda_RNAhybrid	-20.12	160	1012	1037	-38.3	0.024209	1261	1295
hsa-miR-1183	NIPBL	Miranda_RNAhybrid	-21.23	150	664	690	-28.6	0.616356	1067	1097
hsa-miR-1183	OSMR	Miranda_RNAhybrid	-22.8	159	641	666	-30.8	0.395292	634	667
hsa-miR-1183	GHR	Miranda_RNAhybrid	-23.75	151	612	643	-34	0.153234	1525	1558
hsa-miR-1183	SKIV2L2	Miranda_RNAhybrid	-26.01	155	545	570	-28	0.39146	527	571
hsa-miR-1183	ERCC8	Miranda_RNAhybrid	-20.89	151	219	247	-28.3	0.346652	219	247
hsa-miR-1183	SREK1IP1	Miranda_RNAhybrid	-21.08	162	4013	4039	-29.3	0.909277	790	816
hsa-miR-1183	PIK3R1	Miranda_RNAhybrid	-24.12	171	2476	2502	-28.7	0.878938	2515	2547
hsa-miR-1183	FAM169A	Miranda_RNAhybrid	-26.63	164	964	988	-28.6	0.869032	964	988
hsa-miR-1183	COL4A3BP	Miranda_RNAhybrid	-21.28	159	467	492	-30.6	0.540708	2519	2551
hsa-miR-1183	SCAMP1	Miranda_RNAhybrid	-21.51	161	4890	4918	-28.6	0.923889	1468	1492
hsa-miR-1183	DHFR	Miranda_RNAhybrid	-29.49	163	196	227	-34.3	0.162522	1644	1669
hsa-miR-1183	FAM172A	Miranda_RNAhybrid	-22.35	152	1176	1204	-29.8	0.668748	1171	1204
hsa-miR-1183	KIAA0825	Miranda_RNAhybrid	-25.53	165	1420	1444	-32.5	0.322415	2596	2632
hsa-miR-1183	ELL2	Miranda_RNAhybrid	-21.42	161	3383	3407	-27.9	0.922802	3377	3407
hsa-miR-1183	LIX1	Miranda_RNAhybrid	-26.84	160	504	533	-29.8	0.623288	502	534
hsa-miR-1183	SRP19	Miranda_RNAhybrid	-20.83	155	548	576	-25.8	0.907949	554	576
hsa-miR-1183	FEM1C	Miranda_RNAhybrid	-22.76	164	417	445	-28.1	0.88526	420	445
hsa-miR-1183	AP3S1	Miranda_RNAhybrid	-25.21	155	262	289	-30.9	0.090813	247	290
hsa-miR-1183	SMAD5	Miranda_RNAhybrid	-22.89	160	1063	1087	-28.4	0.942343	1064	1087
hsa-miR-1183	PCDHB6	Miranda_RNAhybrid	-30.41	176	387	414	-30.5	0.120603	385	415
hsa-miR-1183	ARHGAP26	Miranda_RNAhybrid	-30.31	168	5153	5180	-33.5	0.435667	5153	5180
hsa-miR-1183	JAKMIP2	Miranda_RNAhybrid	-21.05	163	5750	5776	-25.3	0.99995	2596	2640
hsa-miR-1183	GM2A	Miranda_RNAhybrid	-28.1	164	90	117	-36.8	0.068941	79	118
hsa-miR-1183	SGCD	Miranda_RNAhybrid	-28.97	172	701	729	-32.3	0.665595	695	729
hsa-miR-1183	GABRB2	Miranda_RNAhybrid	-21.73	163	3599	3630	-28.7	0.934704	3596	3630
hsa-miR-1183	FAF2	Miranda_RNAhybrid	-27.81	169	2027	2053	-27.8	0.895414	978	1043
hsa-miR-1183	DOK3	Miranda_RNAhybrid	-22.79	163	502	527	-29.8	0.301006	486	527
hsa-miR-1183	SLC35E2	Miranda_RNAhybrid	-32.37	159	1342	1369	-35.6	0.187816	1340	1370
hsa-miR-1183	RERE	Miranda_RNAhybrid	-25.27	173	2301	2329	-31.9	0.33617	2297	2329
hsa-miR-1183	PLEKHM2	Miranda_RNAhybrid	-22.53	156	74	100	-31.3	0.119477	56	100
hsa-miR-1183	MAN1C1	Miranda_RNAhybrid	-20.48	160	339	366	-31.3	0.368908	1449	1491
hsa-miR-1183	WASF2	Miranda_RNAhybrid	-23.9	159	2350	2373	-33.1	0.327178	3068	3092
hsa-miR-1183	EYA3	Miranda_RNAhybrid	-26.14	165	329	354	-32.6	0.391231	2880	2914
hsa-miR-1183	PTAFR	Miranda_RNAhybrid	-21.32	150	198	224	-35.5	0.105176	1781	1818
hsa-miR-1183	CLSPN	Miranda_RNAhybrid	-24.8	158	2084	2112	-31.2	0.585094	286	320
hsa-miR-1183	MYCBP	Miranda_RNAhybrid	-23.64	160	1185	1212	-28.6	0.689244	1178	1212
hsa-miR-1183	PPT1	Miranda_RNAhybrid	-21.95	161	547	571	-30.4	0.288739	167	193
hsa-miR-1183	COL9A2	Miranda_RNAhybrid	-26.15	153	365	390	-29.4	0.20335	365	390
hsa-miR-1183	EXO5	Miranda_RNAhybrid	-25.4	155	309	344	-28.1	0.417162	310	344
hsa-miR-1183	RIMS3	Miranda_RNAhybrid	-25.83	162	2474	2498	-34.3	0.315014	2935	2967
hsa-miR-1183	RIMKLA	Miranda_RNAhybrid	-22.12	162	3913	3940	-31.1	0.834943	2258	2292
hsa-miR-1183	ARTN	Miranda_RNAhybrid	-28.51	171	299	324	-29.6	0.117812	299	325
hsa-miR-1183	PIK3R3	Miranda_RNAhybrid	-21.55	161	22	48	-29	0.799319	2571	2596
hsa-miR-1183	EPS15	Miranda_RNAhybrid	-23.65	162	1496	1525	-28.6	0.729154	1483	1525
hsa-miR-1183	OSBPL9	Miranda_RNAhybrid	-23.35	169	1251	1277	-38.1	0.016213	1238	1277
hsa-miR-1183	ZYG11B	Miranda_RNAhybrid	-20.69	152	253	281	-31	0.703253	2555	2587
hsa-miR-1183	USP24	Miranda_RNAhybrid	-24.06	177	2394	2420	-29.7	0.61174	2069	2095
hsa-miR-1183	SGIP1	Miranda_RNAhybrid	-27.58	166	158	183	-29.8	0.918042	160	183
hsa-miR-1183	ST6GALNAC3	Miranda_RNAhybrid	-27.1	170	521	547	-33.2	0.435191	497	547
hsa-miR-1183	ST6GALNAC5	Miranda_RNAhybrid	-28	164	3610	3637	-30.4	0.687683	3472	3502
hsa-miR-1183	GBP6	Miranda_RNAhybrid	-29.29	168	2533	2562	-33.5	0.200586	2531	2562
hsa-miR-1183	FNBP1L	Miranda_RNAhybrid	-20.72	159	2191	2216	-31	0.535024	2304	2332
hsa-miR-1183	LPPR4	Miranda_RNAhybrid	-23.77	156	2061	2090	-29.2	0.665959	2062	2090
hsa-miR-1183	DBT	Miranda_RNAhybrid	-23.11	162	3753	3780	-32.7	0.650107	6918	6952
hsa-miR-1183	CLCC1	Miranda_RNAhybrid	-23.71	173	1163	1189	-31	0.481377	1507	1537
hsa-miR-1183	KCNA2	Miranda_RNAhybrid	-21.74	154	62	88	-31.4	0.005835	57	89
hsa-miR-1183	RSBN1	Miranda_RNAhybrid	-23.03	152	414	437	-27.4	0.964707	404	438
hsa-miR-1183	TRIM33	Miranda_RNAhybrid	-23.05	151	83	111	-29.8	0.796087	67	112
hsa-miR-1183	VANGL1	Miranda_RNAhybrid	-27.55	171	3088	3113	-32.7	0.541995	2312	2360
hsa-miR-1183	MAN1A2	Miranda_RNAhybrid	-22.05	151	80	106	-29.7	0.847391	66	107
hsa-miR-1183	FAM46C	Miranda_RNAhybrid	-25.51	150	145	169	-29.1	0.846444	177	208
hsa-miR-1183	GDAP2	Miranda_RNAhybrid	-25.64	175	1851	1879	-32.4	0.594253	3153	3197
hsa-miR-1183	SRGAP2D	Miranda_RNAhybrid	-31.83	170	102	129	-34.7	0.06598	102	129
hsa-miR-1183	SRGAP2B	Miranda_RNAhybrid	-31.83	170	102	129	-34.7	0.065588	102	129
hsa-miR-1183	RBM8A	Miranda_RNAhybrid	-22.29	155	4074	4104	-32.4	0.429275	3666	3700
hsa-miR-1183	ENSA	Miranda_RNAhybrid	-23.35	157	506	534	-30.9	0.407159	532	571
hsa-miR-1183	TUFT1	Miranda_RNAhybrid	-25.12	161	241	266	-33	0.163329	1254	1288
hsa-miR-1183	CELF3	Miranda_RNAhybrid	-24.75	160	3040	3063	-30.3	0.613972	3020	3064
hsa-miR-1183	S100A7A	Miranda_RNAhybrid	-24.5	167	1449	1475	-31.5	0.506017	1445	1475
hsa-miR-1183	IL6R	Miranda_RNAhybrid	-23.96	165	555	581	-31.6	0.506658	552	581
hsa-miR-1183	KCNN3	Miranda_RNAhybrid	-21.24	152	9268	9295	-32.6	0.701154	7181	7215
hsa-miR-1183	HDGF	Miranda_RNAhybrid	-24.42	162	1183	1212	-30.4	0.284899	1162	1212
hsa-miR-1183	CD1D	Miranda_RNAhybrid	-22.25	153	1480	1507	-29.5	0.576706	1459	1508
hsa-miR-1183	SLAMF8	Miranda_RNAhybrid	-31.18	179	1645	1672	-37.6	0.036898	1622	1672
hsa-miR-1183	KCNJ10	Miranda_RNAhybrid	-24.63	160	1778	1805	-32.4	0.398301	3660	3709
hsa-miR-1183	PEA15	Miranda_RNAhybrid	-23.97	167	1015	1040	-32.9	0.170257	996	1046
hsa-miR-1183	COPA	Miranda_RNAhybrid	-20.19	163	180	205	-29.1	0.493755	402	431
hsa-miR-1183	MAEL	Miranda_RNAhybrid	-26.49	163	37	62	-29.8	0.073325	37	62
hsa-miR-1183	ATP1B1	Miranda_RNAhybrid	-20.4	157	1033	1059	-29.3	0.366915	237	283
hsa-miR-1183	FMO2	Miranda_RNAhybrid	-23.7	157	2497	2524	-29.2	0.788175	2460	2504
hsa-miR-1183	KIAA0040	Miranda_RNAhybrid	-21.36	162	426	452	-27.2	0.96238	619	646
hsa-miR-1183	ABL2	Miranda_RNAhybrid	-28.22	164	2544	2571	-35	0.350483	2543	2572
hsa-miR-1183	MR1	Miranda_RNAhybrid	-26.35	165	5229	5254	-29.4	0.914162	5218	5255
hsa-miR-1183	GLUL	Miranda_RNAhybrid	-26.42	154	2642	2670	-31.5	0.37696	2629	2671
hsa-miR-1183	TEDDM1	Miranda_RNAhybrid	-24.83	169	1007	1036	-29.9	0.385289	1007	1036
hsa-miR-1183	LHX9	Miranda_RNAhybrid	-24.18	164	1543	1570	-35	0.157911	2295	2333
hsa-miR-1183	RABIF	Miranda_RNAhybrid	-20.77	158	457	483	-26.9	0.936051	459	483
hsa-miR-1183	PPFIA4	Miranda_RNAhybrid	-20.69	157	1101	1127	-38	0.033321	503	536
hsa-miR-1183	MYBPH	Miranda_RNAhybrid	-30.65	166	410	435	-35.2	0.017635	411	435
hsa-miR-1183	PLEKHA6	Miranda_RNAhybrid	-20.11	168	2069	2095	-32.6	0.377106	1152	1181
hsa-miR-1183	MDM4	Miranda_RNAhybrid	-20.31	158	6508	6537	-33.2	0.553704	516	546
hsa-miR-1183	C1orf116	Miranda_RNAhybrid	-28.5	159	453	478	-30	0.660138	456	479
hsa-miR-1183	YOD1	Miranda_RNAhybrid	-22.56	153	2220	2248	-28.6	0.927166	4042	4085
hsa-miR-1183	LPGAT1	Miranda_RNAhybrid	-21.87	164	5343	5370	-31.4	0.691995	1222	1256
hsa-miR-1183	ESRRG	Miranda_RNAhybrid	-22.74	158	1228	1253	-35.4	0.144215	1215	1254
hsa-miR-1183	CNIH4	Miranda_RNAhybrid	-21.46	151	15	41	-28.5	0.429282	688	727
hsa-miR-1183	IBA57	Miranda_RNAhybrid	-27.78	153	4918	4944	-31.2	0.732129	1359	1382
hsa-miR-1183	MAP10	Miranda_RNAhybrid	-22.1	156	243	271	-29	0.632357	424	451
hsa-miR-1183	ACTN2	Miranda_RNAhybrid	-21.24	163	1410	1436	-29.2	0.573708	1409	1436
hsa-miR-1183	DESI2	Miranda_RNAhybrid	-22.53	155	2236	2267	-28	0.883817	681	725
hsa-miR-1183	SFMBT2	Miranda_RNAhybrid	-29.73	168	1695	1723	-32.5	0.474431	1696	1724
hsa-miR-1183	UCMA	Miranda_RNAhybrid	-35.67	171	225	250	-35.9	0.003908	215	251
hsa-miR-1183	ENKUR	Miranda_RNAhybrid	-25.73	169	1537	1563	-30.6	0.453435	1521	1564
hsa-miR-1183	ANKRD26	Miranda_RNAhybrid	-26.25	167	989	1016	-30.7	0.286943	970	1016
hsa-miR-1183	ZNF37A	Miranda_RNAhybrid	-20.08	156	319	346	-26	0.997463	3252	3281
hsa-miR-1183	BMS1	Miranda_RNAhybrid	-21.55	150	3032	3058	-32.4	0.391444	2372	2400
hsa-miR-1183	VSTM4	Miranda_RNAhybrid	-25.61	156	1481	1510	-30.8	0.710478	1485	1510
hsa-miR-1183	ERCC6	Miranda_RNAhybrid	-21.74	165	678	703	-30.3	0.706367	1745	1785
hsa-miR-1183	PRKG1	Miranda_RNAhybrid	-24.28	164	116	143	-29.6	0.7974	108	144
hsa-miR-1183	IPMK	Miranda_RNAhybrid	-26	171	2726	2754	-27.8	0.956533	2727	2754
hsa-miR-1183	ANK3	Miranda_RNAhybrid	-25.73	162	1429	1461	-30.4	0.617	1427	1461
hsa-miR-1183	REEP3	Miranda_RNAhybrid	-30.66	159	3027	3060	-32.6	0.401058	1864	1897
hsa-miR-1183	RUFY2	Miranda_RNAhybrid	-24.63	156	576	602	-29.8	0.55003	574	603
hsa-miR-1183	EIF4EBP2	Miranda_RNAhybrid	-21.94	162	5542	5566	-32.9	0.522102	4546	4583
hsa-miR-1183	PTEN	Miranda_RNAhybrid	-20.28	167	576	604	-29.3	0.855236	2627	2654
hsa-miR-1183	BTAF1	Miranda_RNAhybrid	-29	167	809	835	-33.8	0.136166	806	836
hsa-miR-1183	LGI1	Miranda_RNAhybrid	-20.3	155	15	42	-28.6	0.122382	4	42
hsa-miR-1183	ITPRIP	Miranda_RNAhybrid	-27.45	152	124	150	-33.6	0.326959	122	151
hsa-miR-1183	SHOC2	Miranda_RNAhybrid	-20.25	167	915	940	-25.3	0.972989	376	407
hsa-miR-1183	C10orf118	Miranda_RNAhybrid	-26.44	164	2339	2366	-30.2	0.710446	888	932
hsa-miR-1183	KIAA1598	Miranda_RNAhybrid	-27.39	164	2003	2031	-30.5	0.538471	2004	2031
hsa-miR-1183	FAM204A	Miranda_RNAhybrid	-29.49	164	4766	4792	-33.7	0.331902	376	413
hsa-miR-1183	GPR26	Miranda_RNAhybrid	-25.75	157	3344	3369	-34.5	0.428945	5904	5955
hsa-miR-1183	EDRF1	Miranda_RNAhybrid	-26.18	161	406	431	-28.3	0.296669	410	432
hsa-miR-1183	ADAM12	Miranda_RNAhybrid	-24.39	163	2147	2171	-32.2	0.4944	4551	4589
hsa-miR-1183	GRHL1	Miranda_RNAhybrid	-26.95	162	330	358	-30.6	0.312141	336	359
hsa-miR-873-5p	CD274	Miranda_RNAhybrid	-22.21	151	341	358	-26.6	0.661518	342	359
hsa-miR-873-5p	PTPLAD2	Miranda_RNAhybrid	-21	162	2406	2426	-25.1	0.927543	2401	2426
hsa-miR-873-5p	SIGMAR1	Miranda_RNAhybrid	-21.3	160	316	335	-28.4	0.151902	301	336
hsa-miR-873-5p	RGP1	Miranda_RNAhybrid	-33.94	170	336	357	-38	0.017466	335	358
hsa-miR-873-5p	RNF38	Miranda_RNAhybrid	-21.61	159	1989	2009	-27.1	0.664833	1985	2009
hsa-miR-873-5p	PAX5	Miranda_RNAhybrid	-21.21	154	5256	5273	-27.7	0.839548	671	708
hsa-miR-873-5p	SPIN1	Miranda_RNAhybrid	-20.94	151	1209	1229	-26.6	0.750208	1212	1230
hsa-miR-873-5p	SEMA4D	Miranda_RNAhybrid	-22.61	154	261	282	-27	0.364179	254	282
hsa-miR-873-5p	CENPP	Miranda_RNAhybrid	-20.15	151	591	611	-30	0.156064	354	385
hsa-miR-873-5p	FANCC	Miranda_RNAhybrid	-20.05	151	1989	2009	-25.2	0.859048	1989	2009
hsa-miR-873-5p	ZNF510	Miranda_RNAhybrid	-20.4	163	1656	1676	-26.9	0.642376	1652	1677
hsa-miR-873-5p	SLC31A1	Miranda_RNAhybrid	-22.34	163	1263	1283	-26.6	0.803242	1261	1284
hsa-miR-873-5p	PTGS1	Miranda_RNAhybrid	-21.86	150	2222	2243	-25.2	0.902773	391	417
hsa-miR-873-5p	URM1	Miranda_RNAhybrid	-22.34	167	3564	3584	-25	0.961785	3569	3584
hsa-miR-873-5p	LRRC8A	Miranda_RNAhybrid	-21.82	151	898	918	-27.2	0.381829	322	345
hsa-miR-873-5p	FAM73B	Miranda_RNAhybrid	-23.11	153	153	172	-26.6	0.459736	153	172
hsa-miR-873-5p	CRAT	Miranda_RNAhybrid	-20.5	151	518	540	-26.7	0.149748	516	541
hsa-miR-873-5p	PPP2R4	Miranda_RNAhybrid	-22.53	158	23	41	-26.9	0.380821	25	42
hsa-miR-873-5p	IER5L	Miranda_RNAhybrid	-29.43	169	907	931	-32.6	0.027425	907	931
hsa-miR-873-5p	PTGES	Miranda_RNAhybrid	-20.34	154	844	864	-28.1	0.20315	841	865
hsa-miR-873-5p	INPP5E	Miranda_RNAhybrid	-21.02	156	295	319	-26.3	0.343625	293	319
hsa-miR-873-5p	C9orf163	Miranda_RNAhybrid	-22.08	150	217	237	-27.7	0.182366	219	238
hsa-miR-873-5p	ADCY2	Miranda_RNAhybrid	-23.73	169	1433	1453	-28.6	0.421725	1422	1453
hsa-miR-873-5p	CCT5	Miranda_RNAhybrid	-22.44	162	1481	1503	-25.5	0.633378	1482	1504
hsa-miR-873-5p	ANKRD33B	Miranda_RNAhybrid	-22.53	150	5481	5500	-28.2	0.793656	5485	5501
hsa-miR-873-5p	FAM105B	Miranda_RNAhybrid	-21.08	157	5883	5904	-27	0.893514	5881	5904
hsa-miR-873-5p	C5orf51	Miranda_RNAhybrid	-24.44	155	2125	2145	-26.3	0.862887	2125	2146
hsa-miR-873-5p	IL6ST	Miranda_RNAhybrid	-22.19	156	1	18	-26.8	0.888469	1	19
hsa-miR-873-5p	MRPS27	Miranda_RNAhybrid	-27.33	166	243	267	-31.6	0.053904	244	267
hsa-miR-873-5p	ZFYVE16	Miranda_RNAhybrid	-23.78	157	2233	2256	-28.5	0.349234	2232	2257
hsa-miR-873-5p	EFNA5	Miranda_RNAhybrid	-24.69	150	165	186	-28.7	0.518887	164	187
hsa-miR-873-5p	MCC	Miranda_RNAhybrid	-20.92	166	2562	2582	-27.7	0.734383	2566	2582
hsa-miR-873-5p	LYRM7	Miranda_RNAhybrid	-24.19	160	1800	1825	-27	0.860579	1802	1825
hsa-miR-873-5p	FSTL4	Miranda_RNAhybrid	-20.67	155	997	1017	-25.8	0.775955	994	1017
hsa-miR-873-5p	KLHL3	Miranda_RNAhybrid	-20.73	150	894	911	-26.3	0.877748	891	912
hsa-miR-873-5p	PCDHB9	Miranda_RNAhybrid	-23.28	162	1029	1050	-28.3	0.277429	1259	1287
hsa-miR-873-5p	FGF1	Miranda_RNAhybrid	-24.59	165	2414	2435	-28.4	0.438358	1005	1023
hsa-miR-873-5p	NDST1	Miranda_RNAhybrid	-23.27	157	4357	4379	-28.5	0.590385	1837	1866
hsa-miR-873-5p	MAPK9	Miranda_RNAhybrid	-23.12	158	873	894	-28.9	0.336754	874	895
hsa-miR-873-5p	C1orf159	Miranda_RNAhybrid	-20.47	154	804	825	-26.1	0.375906	802	825
hsa-miR-873-5p	MXRA8	Miranda_RNAhybrid	-23.24	150	400	422	-27.6	0.169488	400	422
hsa-miR-873-5p	KLHL21	Miranda_RNAhybrid	-22.59	157	1939	1958	-27.7	0.479052	1940	1959
hsa-miR-873-5p	ERRFI1	Miranda_RNAhybrid	-21.74	157	736	755	-25.5	0.602495	741	756
hsa-miR-873-5p	SLC2A5	Miranda_RNAhybrid	-24.7	157	521	541	-28.5	0.068844	524	542
hsa-miR-873-5p	PADI2	Miranda_RNAhybrid	-23.9	165	2091	2113	-28	0.383928	2095	2114
hsa-miR-873-5p	ZBTB40	Miranda_RNAhybrid	-20.77	155	1119	1139	-28.6	0.566093	666	683
hsa-miR-873-5p	WASF2	Miranda_RNAhybrid	-20.67	155	941	961	-26.6	0.798452	3242	3278
hsa-miR-873-5p	MATN1	Miranda_RNAhybrid	-26.25	166	888	909	-30.5	0.14914	889	910
hsa-miR-873-5p	KPNA6	Miranda_RNAhybrid	-25.41	174	604	624	-28.5	0.646477	607	624
hsa-miR-873-5p	BSDC1	Miranda_RNAhybrid	-25.07	162	1380	1401	-30.3	0.233073	1381	1402
hsa-miR-873-5p	SMAP2	Miranda_RNAhybrid	-23.12	161	1152	1171	-26	0.44018	1153	1171
hsa-miR-873-5p	RAB3B	Miranda_RNAhybrid	-21.4	158	976	996	-26.2	0.993779	982	997
hsa-miR-873-5p	ZYG11B	Miranda_RNAhybrid	-21.53	156	702	721	-27.9	0.737731	704	722
hsa-miR-873-5p	FNBP1L	Miranda_RNAhybrid	-24.14	164	1272	1291	-27.9	0.560077	1274	1291
hsa-miR-873-5p	CYB561D1	Miranda_RNAhybrid	-20.57	154	472	492	-26.9	0.809864	1464	1481
hsa-miR-873-5p	GNAI3	Miranda_RNAhybrid	-28.54	171	2444	2464	-31.2	0.181076	2445	2465
hsa-miR-873-5p	KCNC4	Miranda_RNAhybrid	-21.98	157	248	267	-26.1	0.566711	249	267
hsa-miR-873-5p	WDR77	Miranda_RNAhybrid	-20.53	156	151	170	-32	0.038382	145	171
hsa-miR-873-5p	VANGL1	Miranda_RNAhybrid	-20.7	153	6514	6535	-27.5	0.841371	291	321
hsa-miR-873-5p	S100A7A	Miranda_RNAhybrid	-20.78	153	2615	2638	-26	0.870256	457	492
hsa-miR-873-5p	FCRL5	Miranda_RNAhybrid	-21.56	159	401	420	-26.5	0.611558	387	421
hsa-miR-873-5p	KCNJ9	Miranda_RNAhybrid	-20.03	150	964	989	-25.9	0.775585	964	990
hsa-miR-873-5p	POU2F1	Miranda_RNAhybrid	-20.81	151	958	975	-27.3	0.960171	11188	11209
hsa-miR-873-5p	LAMC1	Miranda_RNAhybrid	-21.43	158	1182	1202	-25.9	0.78252	1186	1203
hsa-miR-873-5p	TPR	Miranda_RNAhybrid	-20.64	158	1747	1768	-30.1	0.176613	1743	1769
hsa-miR-873-5p	KCNT2	Miranda_RNAhybrid	-23.66	161	647	668	-27.3	0.50921	649	669
hsa-miR-873-5p	PPFIA4	Miranda_RNAhybrid	-21.23	155	523	541	-25.8	0.734103	524	542
hsa-miR-873-5p	NFASC	Miranda_RNAhybrid	-22.04	159	4260	4280	-28.6	0.668615	3456	3476
hsa-miR-873-5p	ESRRG	Miranda_RNAhybrid	-21.6	158	152	173	-25.1	0.940843	151	173
hsa-miR-873-5p	ITPKB	Miranda_RNAhybrid	-30.4	171	2450	2470	-35.2	0.028452	2448	2470
hsa-miR-873-5p	GJC2	Miranda_RNAhybrid	-27.21	161	648	667	-31.7	0.018252	643	668
hsa-miR-873-5p	TRIM11	Miranda_RNAhybrid	-21.51	156	349	368	-27	0.251666	340	369
hsa-miR-873-5p	DISC1	Miranda_RNAhybrid	-21.8	151	1963	1983	-25.1	0.965204	1963	1984
hsa-miR-873-5p	LARP4B	Miranda_RNAhybrid	-25.47	155	989	1007	-29	0.592745	989	1008
hsa-miR-873-5p	ADARB2	Miranda_RNAhybrid	-25.17	158	5080	5101	-28.3	0.689342	5079	5101
hsa-miR-873-5p	C10orf126	Miranda_RNAhybrid	-20.35	160	1047	1067	-25.4	0.6084	1042	1067
hsa-miR-873-5p	CCDC6	Miranda_RNAhybrid	-29.37	157	2525	2547	-32.3	0.142137	2525	2548
[truncated: 26,503 more rows]

## Sheet: Supplemental Table S4
PathwayID	PathwayTerm	DifGene	AllDifGene	GeneInPathway	AllGene	P-Value	FDR	Enrichment	(-log10P)
PATH:04360	Axon guidance	104	3302	131	6782	2.85056e-13	8.06709e-11	1.63058	12.5451
PATH:05200	Pathways in cancer	217	3302	330	6782	1.11805e-10	1.58204e-08	1.3506	9.95154
PATH:04010	MAPK signaling pathway	180	3302	275	6782	7.95e-09	7.4995e-07	1.34438	8.09963
PATH:04015	Rap1 signaling pathway	143	3302	213	6782	2.5844e-08	1.82846e-06	1.37891	7.58764
PATH:04144	Endocytosis	137	3302	204	6782	4.95008e-08	2.80175e-06	1.37934	7.30539
PATH:04921	Oxytocin signaling pathway	108	3302	158	6782	3.38063e-07	1.46305e-05	1.40394	6.471
PATH:04310	Wnt signaling pathway	105	3302	153	6782	3.61886e-07	1.46305e-05	1.40954	6.44143
PATH:04014	Ras signaling pathway	147	3302	227	6782	5.15217e-07	1.82258e-05	1.33006	6.28801
PATH:04022	cGMP-PKG signaling pathway	112	3302	167	6782	9.28159e-07	2.66737e-05	1.37747	6.03238
PATH:05205	Proteoglycans in cancer	145	3302	225	6782	9.42532e-07	2.66737e-05	1.32363	6.0257
PATH:05214	Glioma	50	3302	65	6782	2.72253e-06	7.00432e-05	1.57993	5.56503
PATH:04724	Glutamatergic synapse	89	3302	130	6782	3.30334e-06	7.79038e-05	1.40614	5.48105
PATH:04012	ErbB signaling pathway	63	3302	87	6782	5.19543e-06	0.0001131	1.48731	5.28438
PATH:04066	HIF-1 signaling pathway	74	3302	106	6782	7.37226e-06	0.000135107	1.43386	5.1324
PATH:04261	Adrenergic signaling in cardiomyocytes	99	3302	149	6782	7.423e-06	0.000135107	1.36468	5.12942
PATH:04916	Melanogenesis	71	3302	101	6782	7.63858e-06	0.000135107	1.44384	5.11699
PATH:04390	Hippo signaling pathway	101	3302	153	6782	9.25599e-06	0.000154085	1.35585	5.03358
PATH:04910	Insulin signaling pathway	94	3302	142	6782	1.58441e-05	0.000249105	1.35963	4.80013
PATH:04670	Leukocyte transendothelial migration	80	3302	118	6782	1.81491e-05	0.000270325	1.39248	4.74115
PATH:04510	Focal adhesion	130	3302	207	6782	2.34344e-05	0.000331596	1.28989	4.63015
PATH:04919	Thyroid hormone signaling pathway	79	3302	119	6782	6.41573e-05	0.000864595	1.36352	4.19275
PATH:04020	Calcium signaling pathway	116	3302	185	6782	7.06063e-05	0.000908254	1.28786	4.15116
PATH:04722	Neurotrophin signaling pathway	85	3302	130	6782	7.88644e-05	0.000970376	1.34294	4.10312
PATH:04912	GnRH signaling pathway	70	3302	104	6782	8.58344e-05	0.000997154	1.38244	4.06634
PATH:00564	Glycerophospholipid metabolism	63	3302	92	6782	8.80878e-05	0.000997154	1.40648	4.05508
PATH:04530	Tight junction	87	3302	134	6782	9.55167e-05	0.00103604	1.33351	4.01992
PATH:04725	Cholinergic synapse	75	3302	113	6782	9.88446e-05	0.00103604	1.36321	4.00505
PATH:05215	Prostate cancer	61	3302	89	6782	0.000109188	0.00110358	1.40773	3.96182
PATH:04723	Retrograde endocannabinoid signaling	69	3302	103	6782	0.000120628	0.00115884	1.37592	3.91855
PATH:04370	VEGF signaling pathway	55	3302	79	6782	0.000122845	0.00115884	1.42994	3.91064
PATH:04721	Synaptic vesicle cycle	46	3302	64	6782	0.000131893	0.00120406	1.47625	3.87978
PATH:04810	Regulation of actin cytoskeleton	133	3302	218	6782	0.000136345	0.0012058	1.25307	3.86536
PATH:05223	Non-small cell lung cancer	41	3302	56	6782	0.000156742	0.00134418	1.50375	3.80482
PATH:04664	Fc epsilon RI signaling pathway	57	3302	83	6782	0.000167805	0.00139673	1.41051	3.7752
PATH:04750	Inflammatory mediator regulation of TRP channels	66	3302	99	6782	0.000209639	0.00169508	1.36927	3.67853
PATH:04971	Gastric acid secretion	52	3302	75	6782	0.000221005	0.00173734	1.42404	3.6556
PATH:05211	Renal cell carcinoma	49	3302	70	6782	0.000231827	0.00177316	1.43773	3.63484
PATH:04960	Aldosterone-regulated sodium reabsorption	32	3302	42	6782	0.000245431	0.00182781	1.56488	3.61007
PATH:04068	FoxO signaling pathway	85	3302	133	6782	0.000255678	0.00185531	1.31265	3.59231
PATH:05032	Morphine addiction	62	3302	93	6782	0.0003237	0.00229018	1.36927	3.48986
PATH:04130	SNARE interactions in vesicular transport	28	3302	36	6782	0.000331964	0.00229136	1.59748	3.47891
PATH:04070	Phosphatidylinositol signaling system	55	3302	81	6782	0.000343219	0.00231264	1.39463	3.46443
PATH:04666	Fc gamma R-mediated phagocytosis	63	3302	95	6782	0.000362844	0.00238802	1.36206	3.44028
PATH:04728	Dopaminergic synapse	83	3302	131	6782	0.000454631	0.0029241	1.30133	3.34234
PATH:04911	Insulin secretion	58	3302	87	6782	0.000500354	0.00314667	1.36927	3.30072
PATH:04930	Type II diabetes mellitus	35	3302	48	6782	0.000540266	0.00332381	1.49764	3.26739
PATH:04720	Long-term potentiation	48	3302	70	6782	0.000572189	0.00337353	1.40839	3.24246
PATH:05212	Pancreatic cancer	48	3302	70	6782	0.000572189	0.00337353	1.40839	3.24246
PATH:05217	Basal cell carcinoma	39	3302	55	6782	0.000664779	0.00383944	1.45641	3.17732
PATH:05202	Transcriptional misregulation in cancer	109	3302	180	6782	0.000788796	0.00446458	1.24375	3.10304
PATH:04611	Platelet activation	82	3302	131	6782	0.000849985	0.00471658	1.28565	3.07059
PATH:04270	Vascular smooth muscle contraction	76	3302	121	6782	0.00112586	0.00612729	1.29006	2.94851
PATH:00051	Fructose and mannose metabolism	27	3302	36	6782	0.00115559	0.00617043	1.54043	2.9372
PATH:05100	Bacterial invasion of epithelial cells	51	3302	77	6782	0.00134471	0.006986	1.36038	2.87137
PATH:04915	Estrogen signaling pathway	64	3302	100	6782	0.0013577	0.006986	1.3145	2.8672
PATH:04713	Circadian entrainment	62	3302	97	6782	0.00168141	0.00849714	1.31281	2.77433
PATH:04727	GABAergic synapse	58	3302	90	6782	0.00176335	0.00875486	1.32363	2.75366
PATH:05166	HTLV-I infection	152	3302	264	6782	0.00194548	0.00949262	1.18255	2.71097
PATH:04150	mTOR signaling pathway	43	3302	64	6782	0.0020629	0.00984816	1.37997	2.68552
PATH:05218	Melanoma	47	3302	71	6782	0.00208795	0.00984816	1.35963	2.68028
PATH:04520	Adherens junction	48	3302	73	6782	0.00232307	0.0107775	1.35051	2.63394
PATH:04660	T cell receptor signaling pathway	68	3302	109	6782	0.00258366	0.0117932	1.28134	2.58776
PATH:04961	Endocrine and other factor-regulated calcium reabsorption	34	3302	49	6782	0.00263668	0.0118441	1.42516	2.57894
PATH:04917	Prolactin signaling pathway	47	3302	72	6782	0.00320114	0.014155	1.34074	2.4947
PATH:04151	PI3K-Akt signaling pathway	194	3302	347	6782	0.00338178	0.0145571	1.14829	2.47085
PATH:04210	Apoptosis	57	3302	90	6782	0.00344639	0.0145571	1.30081	2.46264
PATH:05414	Dilated cardiomyopathy	57	3302	90	6782	0.00344639	0.0145571	1.30081	2.46264
PATH:05410	Hypertrophic cardiomyopathy (HCM)	53	3302	83	6782	0.00366184	0.0152397	1.31153	2.4363
PATH:00514	Other types of O-glycan biosynthesis	34	3302	50	6782	0.00441578	0.0181111	1.39666	2.35499
PATH:05221	Acute myeloid leukemia	38	3302	57	6782	0.00453446	0.0183322	1.36927	2.34347
PATH:04730	Long-term depression	47	3302	73	6782	0.00478841	0.0190862	1.32238	2.31981
PATH:00601	Glycosphingolipid biosynthesis - lacto and neolacto series	19	3302	25	6782	0.00499723	0.0195014	1.56097	2.30127
PATH:05213	Endometrial cancer	35	3302	52	6782	0.0050304	0.0195014	1.38244	2.2984
PATH:04115	p53 signaling pathway	44	3302	68	6782	0.00546011	0.0208812	1.329	2.2628
PATH:00562	Inositol phosphate metabolism	40	3302	61	6782	0.00563117	0.0212483	1.34682	2.2494
PATH:04918	Thyroid hormone synthesis	46	3302	72	6782	0.00647222	0.0241005	1.31222	2.18895
PATH:05412	Arrhythmogenic right ventricular cardiomyopathy (ARVC)	47	3302	74	6782	0.00699783	0.0257193	1.30451	2.15504
PATH:00310	Lysine degradation	34	3302	51	6782	0.00710828	0.0257903	1.36927	2.14824
PATH:04142	Lysosome	73	3302	122	6782	0.00823049	0.0294075	1.22898	2.08457
PATH:05210	Colorectal cancer	40	3302	62	6782	0.00849119	0.0294075	1.3251	2.07103
PATH:05160	Hepatitis C	81	3302	137	6782	0.00852089	0.0294075	1.21435	2.06952
PATH:04120	Ubiquitin mediated proteolysis	81	3302	137	6782	0.00852089	0.0294075	1.21435	2.06952
PATH:05220	Chronic myeloid leukemia	46	3302	73	6782	0.00934091	0.0318491	1.29424	2.02961
PATH:04668	TNF signaling pathway	66	3302	110	6782	0.0107018	0.0359271	1.23234	1.97054
PATH:05120	Epithelial cell signaling in Helicobacter pylori infection	43	3302	68	6782	0.0107908	0.0359271	1.29879	1.96695
PATH:00360	Phenylalanine metabolism	14	3302	18	6782	0.0115395	0.0377591	1.59748	1.93781
PATH:04514	Cell adhesion molecules (CAMs)	83	3302	142	6782	0.0116079	0.0377591	1.20052	1.93525
PATH:04340	Hedgehog signaling pathway	36	3302	56	6782	0.0132426	0.042587	1.32037	1.87803
PATH:00604	Glycosphingolipid biosynthesis - ganglio series	12	3302	15	6782	0.0135567	0.0431072	1.64313	1.86785
PATH:04662	B cell receptor signaling pathway	47	3302	76	6782	0.0140045	0.0440364	1.27018	1.85373
PATH:04080	Neuroactive ligand-receptor interaction	152	3302	275	6782	0.0150311	0.0467451	1.13525	1.82301
PATH:05142	Chagas disease (American trypanosomiasis)	62	3302	104	6782	0.015736	0.0484054	1.22444	1.8031
PATH:04914	Progesterone-mediated oocyte maturation	52	3302	86	6782	0.0181242	0.0551522	1.2419	1.74174
PATH:05161	Hepatitis B	84	3302	146	6782	0.0187741	0.0565222	1.1817	1.72644
PATH:00532	Glycosaminoglycan biosynthesis - chondroitin sulfate / dermatan sulfate	16	3302	22	6782	0.0194441	0.0579228	1.49375	1.71121
PATH:00533	Glycosaminoglycan biosynthesis - keratan sulfate	11	3302	14	6782	0.022726	0.0669944	1.61378	1.64348
PATH:04962	Vasopressin-regulated water reabsorption	29	3302	45	6782	0.0239124	0.069765	1.32363	1.62138
PATH:04064	NF-kappa B signaling pathway	54	3302	91	6782	0.0259677	0.0749884	1.2188	1.58557
PATH:05219	Bladder cancer	27	3302	42	6782	0.0300676	0.0859507	1.32037	1.5219
PATH:05131	Shigellosis	38	3302	62	6782	0.0307234	0.0869472	1.25885	1.51253
PATH:00561	Glycerolipid metabolism	34	3302	55	6782	0.0340502	0.0954079	1.26969	1.46788
PATH:05031	Amphetamine addiction	42	3302	70	6782	0.0370893	0.101906	1.23234	1.43075
PATH:04920	Adipocytokine signaling pathway	42	3302	70	6782	0.0370893	0.101906	1.23234	1.43075
PATH:04976	Bile secretion	43	3302	72	6782	0.0386272	0.105111	1.22664	1.41311
PATH:04141	Protein processing in endoplasmic reticulum	93	3302	168	6782	0.0471208	0.127002	1.13698	1.32679
PATH:04726	Serotonergic synapse	71	3302	126	6782	0.049744	0.132807	1.15736	1.30326
PATH:05216	Thyroid cancer	19	3302	29	6782	0.0509261	0.134624	1.34566	1.29306
PATH:04970	Salivary secretion	52	3302	90	6782	0.0513761	0.134624	1.1867	1.28924
PATH:04630	Jak-STAT signaling pathway	87	3302	157	6782	0.0520263	0.135077	1.13815	1.28378
PATH:04380	Osteoclast differentiation	74	3302	133	6782	0.0626991	0.160379	1.14278	1.20274
PATH:05222	Small cell lung cancer	51	3302	89	6782	0.0629047	0.160379	1.17696	1.20132
PATH:04330	Notch signaling pathway	29	3302	48	6782	0.0683514	0.172709	1.2409	1.16525
PATH:00790	Folate biosynthesis	10	3302	14	6782	0.0745667	0.184523	1.46708	1.12746
PATH:00603	Glycosphingolipid biosynthesis - globo series	10	3302	14	6782	0.0745667	0.184523	1.46708	1.12746
PATH:04350	TGF-beta signaling pathway	49	3302	86	6782	0.0749829	0.184523	1.17025	1.12504
PATH:04710	Circadian rhythm	19	3302	30	6782	0.0766856	0.187086	1.30081	1.11529
PATH:01230	Biosynthesis of amino acids	42	3302	73	6782	0.0802744	0.194168	1.1817	1.09542
PATH:05169	Epstein-Barr virus infection	107	3302	201	6782	0.107978	0.258965	1.09337	0.966663
PATH:04640	Hematopoietic cell lineage	49	3302	88	6782	0.112371	0.267236	1.14365	0.949344
PATH:04540	Gap junction	50	3302	90	6782	0.113873	0.26855	1.14106	0.943581
PATH:05030	Cocaine addiction	29	3302	50	6782	0.118893	0.278072	1.19127	0.924844
PATH:04320	Dorso-ventral axis formation	15	3302	24	6782	0.124627	0.285174	1.28369	0.904387
PATH:05014	Amyotrophic lateral sclerosis (ALS)	31	3302	54	6782	0.124952	0.285174	1.17909	0.903255
PATH:05110	Vibrio cholerae infection	31	3302	54	6782	0.124952	0.285174	1.17909	0.903255
PATH:05152	Tuberculosis	95	3302	179	6782	0.132699	0.300431	1.09006	0.877131
PATH:00510	N-Glycan biosynthesis	28	3302	49	6782	0.148008	0.332432	1.17366	0.829713
PATH:00531	Glycosaminoglycan degradation	12	3302	19	6782	0.150624	0.333877	1.2972	0.822105
PATH:04122	Sulfur relay system	7	3302	10	6782	0.151012	0.333877	1.43773	0.82099
PATH:00250	Alanine, aspartate and glutamate metabolism	21	3302	36	6782	0.160182	0.348704	1.19811	0.795386
PATH:05340	Primary immunodeficiency	21	3302	36	6782	0.160182	0.348704	1.19811	0.795386
PATH:05033	Nicotine addiction	23	3302	40	6782	0.168622	0.364275	1.181	0.773085
PATH:00400	Phenylalanine, tyrosine and tryptophan biosynthesis	4	3302	5	6782	0.171435	0.367546	1.64313	0.765901
PATH:00592	alpha-Linolenic acid metabolism	15	3302	25	6782	0.175422	0.373267	1.23234	0.755915
PATH:04966	Collecting duct acid secretion	16	3302	27	6782	0.181943	0.384252	1.21713	0.740065
PATH:00512	Mucin type O-Glycan biosynthesis	18	3302	31	6782	0.193091	0.404775	1.19259	0.714238
PATH:00460	Cyanoamino acid metabolism	5	3302	7	6782	0.205479	0.427577	1.46708	0.687233
PATH:00600	Sphingolipid metabolism	26	3302	47	6782	0.221762	0.458093	1.1362	0.654112
PATH:00230	Purine metabolism	88	3302	170	6782	0.231064	0.473848	1.0632	0.636269
PATH:00534	Glycosaminoglycan biosynthesis - heparan sulfate / heparin	15	3302	26	6782	0.234707	0.477857	1.18495	0.629474
PATH:00410	beta-Alanine metabolism	17	3302	30	6782	0.24415	0.493531	1.16388	0.612344
PATH:05143	African trypanosomiasis	19	3302	34	6782	0.251645	0.505075	1.14777	0.599211
PATH:00280	Valine, leucine and isoleucine degradation	24	3302	44	6782	0.264781	0.527697	1.12031	0.577114
PATH:00480	Glutathione metabolism	28	3302	52	6782	0.271605	0.537512	1.10595	0.566062
PATH:01210	2-Oxocarboxylic acid metabolism	10	3302	17	6782	0.27641	0.543222	1.20818	0.558447
PATH:00590	Arachidonic acid metabolism	36	3302	68	6782	0.27975	0.545995	1.08736	0.55323
PATH:05132	Salmonella infection	45	3302	86	6782	0.284008	0.549682	1.07472	0.546669
PATH:01200	Carbon metabolism	55	3302	106	6782	0.285524	0.549682	1.06571	0.544357
PATH:00900	Terpenoid backbone biosynthesis	12	3302	21	6782	0.28861	0.551868	1.17366	0.539689
PATH:04964	Proximal tubule bicarbonate reclamation	13	3302	23	6782	0.293281	0.557038	1.1609	0.532716
PATH:04950	Maturity onset diabetes of the young	14	3302	25	6782	0.297255	0.560822	1.15019	0.52687
PATH:03020	RNA polymerase	17	3302	31	6782	0.30615	0.573778	1.12634	0.514066
PATH:05145	Toxoplasmosis	69	3302	135	6782	0.314757	0.586028	1.04977	0.502024
PATH:04913	Ovarian steroidogenesis	27	3302	51	6782	0.319262	0.586882	1.08736	0.495853
PATH:00750	Vitamin B6 metabolism	4	3302	6	6782	0.319402	0.586882	1.36927	0.495662
PATH:03015	mRNA surveillance pathway	47	3302	91	6782	0.321437	0.586882	1.06081	0.492904
PATH:04650	Natural killer cell mediated cytotoxicity	70	3302	138	6782	0.345292	0.626396	1.04184	0.461813
PATH:04062	Chemokine signaling pathway	96	3302	191	6782	0.356264	0.642182	1.03233	0.448229
PATH:00670	One carbon pool by folate	11	3302	20	6782	0.366168	0.655859	1.12965	0.436319
PATH:01212	Fatty acid metabolism	25	3302	48	6782	0.371434	0.658259	1.06974	0.430119
PATH:00565	Ether lipid metabolism	22	3302	42	6782	0.372161	0.658259	1.07586	0.42927
PATH:04512	ECM-receptor interaction	45	3302	89	6782	0.401305	0.705399	1.03849	0.396525
PATH:05162	Measles	67	3302	134	6782	0.412834	0.721184	1.02695	0.384225
PATH:04060	Cytokine-cytokine receptor interaction	131	3302	265	6782	0.426344	0.73582	1.01533	0.37024
PATH:04114	Oocyte meiosis	56	3302	112	6782	0.426412	0.73582	1.02695	0.370171
PATH:04973	Carbohydrate digestion and absorption	23	3302	45	6782	0.429498	0.736654	1.04977	0.367039
PATH:00260	Glycine, serine and threonine metabolism	20	3302	39	6782	0.434294	0.740393	1.05329	0.362216
PATH:00450	Selenoamino acid metabolism	18	3302	35	6782	0.437699	0.741729	1.05629	0.358825
PATH:04744	Phototransduction	15	3302	29	6782	0.443192	0.746567	1.06237	0.353408
PATH:04614	Renin-angiotensin system	9	3302	17	6782	0.456218	0.763963	1.08736	0.340827
PATH:03450	Non-homologous end-joining	7	3302	13	6782	0.461534	0.767124	1.10595	0.335796
PATH:00010	Glycolysis / Gluconeogenesis	33	3302	66	6782	0.463527	0.767124	1.02695	0.333925
PATH:05146	Amoebiasis	54	3302	109	6782	0.466567	0.767665	1.01753	0.331086
PATH:04972	Pancreatic secretion	50	3302	101	6782	0.473661	0.772328	1.01679	0.324532
PATH:00524	Butirosin and neomycin biosynthesis	3	3302	5	6782	0.475398	0.772328	1.23234	0.322942
PATH:00780	Biotin metabolism	2	3302	3	6782	0.480317	0.772328	1.36927	0.318472
PATH:00300	Lysine biosynthesis	2	3302	3	6782	0.480317	0.772328	1.36927	0.318472
PATH:00380	Tryptophan metabolism	21	3302	42	6782	0.493153	0.788487	1.02695	0.307018
PATH:05133	Pertussis	37	3302	75	6782	0.501062	0.79538	1.01326	0.300109
PATH:05020	Prion diseases	18	3302	36	6782	0.503085	0.79538	1.02695	0.298359
PATH:04620	Toll-like receptor signaling pathway	52	3302	106	6782	0.508175	0.798964	1.00758	0.293987
PATH:00650	Butanoate metabolism	15	3302	30	6782	0.514837	0.804966	1.02695	0.288331
PATH:00030	Pentose phosphate pathway	14	3302	28	6782	0.519302	0.807486	1.02695	0.28458
PATH:04978	Mineral absorption	25	3302	51	6782	0.536508	0.829682	1.00682	0.270424
PATH:05130	Pathogenic Escherichia coli infection	27	3302	56	6782	0.580821	0.888785	0.990276	0.235958
PATH:00052	Galactose metabolism	15	3302	31	6782	0.583775	0.888785	0.993826	0.233755
PATH:00240	Pyrimidine metabolism	50	3302	104	6782	0.588415	0.888785	0.987455	0.230316
PATH:05144	Malaria	25	3302	52	6782	0.589484	0.888785	0.987455	0.229528
PATH:00430	Taurine and hypotaurine metabolism	5	3302	10	6782	0.590429	0.888785	1.02695	0.228832
PATH:00053	Ascorbate and aldarate metabolism	13	3302	27	6782	0.597449	0.894593	0.988918	0.223699
PATH:00563	Glycosylphosphatidylinositol(GPI)-anchor biosynthesis	12	3302	25	6782	0.605202	0.896955	0.985875	0.2181
PATH:00071	Fatty acid metabolism	21	3302	44	6782	0.609285	0.896955	0.980274	0.215179
PATH:00910	Nitrogen metabolism	11	3302	23	6782	0.613721	0.896955	0.982303	0.212029
PATH:00062	Fatty acid elongation	11	3302	23	6782	0.613721	0.896955	0.982303	0.212029
PATH:00350	Tyrosine metabolism	20	3302	42	6782	0.614874	0.896955	0.978051	0.211214
PATH:00980	Metabolism of xenobiotics by cytochrome P450	39	3302	82	6782	0.62376	0.905251	0.976858	0.204983
PATH:04260	Cardiac muscle contraction	37	3302	78	6782	0.631266	0.905803	0.974289	0.199788
PATH:00061	Fatty acid biosynthesis	3	3302	6	6782	0.631395	0.905803	1.02695	0.199699
PATH:00920	Sulfur metabolism	9	3302	19	6782	0.633742	0.905803	0.972903	0.198088
PATH:00591	Linoleic acid metabolism	16	3302	34	6782	0.640716	0.91117	0.966544	0.193334
PATH:05323	Rheumatoid arthritis	43	3302	91	6782	0.648112	0.917079	0.970527	0.18835
PATH:00760	Nicotinate and nicotinamide metabolism	13	3302	28	6782	0.665176	0.930713	0.9536	0.177063
PATH:03440	Homologous recombination	13	3302	28	6782	0.665176	0.930713	0.9536	0.177063
PATH:00730	Thiamine metabolism	2	3302	4	6782	0.667614	0.930713	1.02695	0.175475
PATH:00140	Steroid hormone biosynthesis	27	3302	58	6782	0.676286	0.938181	0.956129	0.169869
PATH:00270	Cysteine and methionine metabolism	18	3302	39	6782	0.683049	0.94294	0.947957	0.165548
PATH:03320	PPAR signaling pathway	33	3302	71	6782	0.688801	0.946266	0.954633	0.161906
PATH:01100	Metabolic pathways	561	3302	1168	6782	0.700445	0.947364	0.986508	0.154626
PATH:04146	Peroxisome	38	3302	82	6782	0.704621	0.947364	0.95181	0.152045
PATH:00520	Amino sugar and nucleotide sugar metabolism	22	3302	48	6782	0.705532	0.947364	0.941374	0.151483
PATH:00100	Steroid biosynthesis	9	3302	20	6782	0.709285	0.947364	0.924258	0.149179
PATH:05164	Influenza A	82	3302	175	6782	0.714598	0.947364	0.962402	0.145938
PATH:00340	Histidine metabolism	14	3302	31	6782	0.716214	0.947364	0.927571	0.144957
PATH:02010	ABC transporters	20	3302	44	6782	0.719089	0.947364	0.933594	0.143217
PATH:00330	Arginine and proline metabolism	27	3302	59	6782	0.719368	0.947364	0.939923	0.143049
PATH:00072	Synthesis and degradation of ketone bodies	4	3302	9	6782	0.719729	0.947364	0.912847	0.142831
PATH:04974	Protein digestion and absorption	41	3302	89	6782	0.726959	0.95245	0.946182	0.13849
PATH:05416	Viral myocarditis	32	3302	70	6782	0.732171	0.954859	0.938929	0.135387
PATH:04110	Cell cycle	57	3302	124	6782	0.758545	0.984717	0.944135	0.120019
PATH:04622	RIG-I-like receptor signaling pathway	32	3302	71	6782	0.767757	0.992124	0.925704	0.114776
PATH:00020	Citrate cycle (TCA cycle)	13	3302	30	6782	0.779189	1	0.890026	0.108357
PATH:00982	Drug metabolism - cytochrome P450	33	3302	74	6782	0.795206	1	0.915931	0.0995205
PATH:00120	Primary bile acid biosynthesis	7	3302	17	6782	0.805462	1	0.845726	0.093955
PATH:00770	Pantothenate and CoA biosynthesis	7	3302	17	6782	0.805462	1	0.845726	0.093955
PATH:00130	Ubiquinone and other terpenoid-quinone biosynthesis	4	3302	10	6782	0.805929	1	0.821563	0.0937034
PATH:03460	Fanconi anemia pathway	23	3302	53	6782	0.818908	1	0.891318	0.0867649
PATH:00620	Pyruvate metabolism	18	3302	42	6782	0.81927	1	0.880246	0.0865728
PATH:00630	Glyoxylate and dicarboxylate metabolism	12	3302	29	6782	0.835195	1	0.849892	0.0782122
PATH:05204	Chemical carcinogenesis	36	3302	82	6782	0.83727	1	0.901715	0.0771346
PATH:00290	Valine, leucine and isoleucine biosynthesis	5	3302	13	6782	0.845106	1	0.789964	0.0730888
PATH:00040	Pentose and glucuronate interconversions	14	3302	34	6782	0.853317	1	0.845726	0.0688895
PATH:04140	Regulation of autophagy	16	3302	39	6782	0.868989	1	0.842628	0.0609857
PATH:04672	Intestinal immune network for IgA production	20	3302	48	6782	0.86914	1	0.855794	0.0609102
PATH:03018	RNA degradation	33	3302	77	6782	0.873851	1	0.880246	0.0585625
PATH:04975	Fat digestion and absorption	19	3302	46	6782	0.87582	1	0.848353	0.0575854
PATH:01040	Biosynthesis of unsaturated fatty acids	8	3302	21	6782	0.883728	1	0.782441	0.0536813
PATH:03022	Basal transcription factors	19	3302	47	6782	0.900754	1	0.830303	0.0453936
PATH:04977	Vitamin digestion and absorption	9	3302	24	6782	0.904447	1	0.770215	0.0436169
PATH:05203	Viral carcinogenesis	92	3302	207	6782	0.905221	1	0.912847	0.0432456
PATH:00830	Retinol metabolism	29	3302	70	6782	0.910475	1	0.850904	0.0407322
PATH:00860	Porphyrin and chlorophyll metabolism	17	3302	43	6782	0.913236	1	0.81201	0.0394171
PATH:00640	Propanoate metabolism	12	3302	32	6782	0.926779	1	0.770215	0.0330239
PATH:00232	Caffeine metabolism	2	3302	7	6782	0.928529	1	0.58683	0.0322045
PATH:00471	D-Glutamine and D-glutamate metabolism	1	3302	4	6782	0.930734	1	0.513477	0.0311745
PATH:05321	Inflammatory bowel disease (IBD)	26	3302	65	6782	0.937835	1	0.821563	0.0278733
PATH:04145	Phagosome	66	3302	154	6782	0.939181	1	0.880246	0.0272506
PATH:03060	Protein export	8	3302	23	6782	0.940124	1	0.714402	0.0268151
PATH:05140	Leishmaniasis	29	3302	72	6782	0.940363	1	0.827268	0.0267045
PATH:03410	Base excision repair	12	3302	33	6782	0.945541	1	0.746875	0.0243199
PATH:04621	NOD-like receptor signaling pathway	24	3302	62	6782	0.956667	1	0.795061	0.0192392
PATH:05168	Herpes simplex infection	78	3302	184	6782	0.964881	1	0.870678	0.0155263
PATH:00500	Starch and sucrose metabolism	21	3302	56	6782	0.96601	1	0.770215	0.0150183
PATH:03420	Nucleotide excision repair	17	3302	47	6782	0.970009	1	0.742902	0.0132244
PATH:00740	Riboflavin metabolism	3	3302	12	6782	0.976172	1	0.513477	0.0104737
PATH:05134	Legionellosis	20	3302	55	6782	0.976353	1	0.746875	0.0103931
PATH:04932	Non-alcoholic fatty liver disease (NAFLD)	62	3302	151	6782	0.976374	1	0.843326	0.0103839
PATH:05016	Huntington's disease	77	3302	185	6782	0.978762	1	0.854869	0.00932305
PATH:03008	Ribosome biogenesis in eukaryotes	33	3302	86	6782	0.979516	1	0.788127	0.00898846
PATH:00511	Other glycan degradation	5	3302	18	6782	0.97986	1	0.57053	0.00883615
PATH:03040	Spliceosome	52	3302	130	6782	0.981985	1	0.821563	0.00789505
PATH:05034	Alcoholism	74	3302	180	6782	0.983922	1	0.844384	0.00703938
PATH:05310	Asthma	9	3302	30	6782	0.98835	1	0.616172	0.00508908
PATH:03050	Proteasome	14	3302	44	6782	0.992374	1	0.653516	0.00332442
PATH:03430	Mismatch repair	6	3302	23	6782	0.99255	1	0.535802	0.00324757
PATH:00983	Drug metabolism - other enzymes	17	3302	52	6782	0.993479	1	0.67147	0.00284117
PATH:05010	Alzheimer's disease	67	3302	170	6782	0.994431	1	0.809481	0.0024255
PATH:05150	Staphylococcus aureus infection	18	3302	55	6782	0.994467	1	0.672188	0.00240947
PATH:04610	Complement and coagulation cascades	23	3302	69	6782	0.996669	1	0.684636	0.0014492
PATH:03030	DNA replication	10	3302	36	6782	0.996883	1	0.57053	0.00135598
PATH:04623	Cytosolic DNA-sensing pathway	20	3302	63	6782	0.997913	1	0.652034	0.000907193
PATH:03013	RNA transport	61	3302	167	6782	0.999488	1	0.750229	0.000222493
PATH:04612	Antigen processing and presentation	23	3302	76	6782	0.999659	1	0.621577	0.000148064
PATH:05332	Graft-versus-host disease	9	3302	40	6782	0.999835	1	0.462129	7.16072e-05
PATH:04940	Type I diabetes mellitus	10	3302	43	6782	0.999842	1	0.477653	6.84577e-05
PATH:05012	Parkinson's disease	49	3302	144	6782	0.999882	1	0.698899	5.13294e-05
PATH:04742	Taste transduction	13	3302	53	6782	0.999917	1	0.503788	3.59649e-05
PATH:00970	Aminoacyl-tRNA biosynthesis	16	3302	63	6782	0.999958	1	0.521627	1.80583e-05
PATH:05330	Allograft rejection	7	3302	37	6782	0.999962	1	0.388577	1.65388e-05
PATH:05206	MicroRNAs in cancer	105	3302	296	6782	0.999999	1	0.728582	4.46797e-07
PATH:05320	Autoimmune thyroid disease	9	3302	52	6782	1	1	0.355484	2.053e-07
PATH:00190	Oxidative phosphorylation	37	3302	133	6782	1	1	0.571388	9.84956e-08
PATH:03010	Ribosome	33	3302	135	6782	1	1	0.502066	6.73921e-10
PATH:05322	Systemic lupus erythematosus	33	3302	136	6782	1	1	0.498374	4.42782e-10
PATH:04740	Olfactory transduction	31	3302	405	6782	1	1	0.157213	5.20857e-12
